# Supplementary material
Source: publisher figshare collection journal article supplement (https://acs.figshare.com/ndownloader/files/22387257)
Supplement: Supplementary file 1 [file 22387257]

## Supporting Information

### Visible light-mediated enantioselective photoreactions of 3-alkylquinolones with 4-*O*-tethered alkenes and allenes

Xinyao Li,<sup>a</sup> Christian Jandl,<sup>a</sup> and Thorsten Bach<sup>\*a</sup>

<sup>a</sup> *Department Chemie and Catalysis Research Center (CRC), Technische Universität München, Lichtenbergstraße 4, 85747 Garching, Germany*

thorsten.bach@ch.tum.de

### Table of Contents

|                                                            |      |
|------------------------------------------------------------|------|
| 1. General Information .....                               | S2   |
| 2. Emission Spectrum of the Light Source .....             | S3   |
| 3. Optimization of Irradiation Conditions .....            | S4   |
| 4. Screening of Catalyst Loadings .....                    | S4   |
| 5. Emission Spectra and Triplet Energy of Quinolones ..... | S5   |
| 6. Synthetic Procedures and Analytical Data .....          | S9   |
| 7. X-ray Crystallographic Details .....                    | S45  |
| 8. NMR-Spectra of New Compounds .....                      | S48  |
| 9. HPLC Traces .....                                       | S100 |
| 10. Reference .....                                        | S111 |

## 1. General Information

All reactions sensitive to air or moisture were carried out in flame-dried glassware under argon pressure using standard Schlenk techniques. Dry tetrahydrofuran (THF) and dichloromethane ( $\text{CH}_2\text{Cl}_2$ ) were obtained from an *MBraun* MB-SPS 800 solvent purification system. Other dry solvents were obtained from *Merck* and *Acros* in the highest purity available and used without further purification. Technical solvents used for aqueous workup and for column chromatography [dichloromethane ( $\text{CH}_2\text{Cl}_2$ ), ethyl acetate (EtOAc), *n*-hexane (Hex), methanol (MeOH), *n*-pentane (Pn)] were distilled prior to use. Photochemical experiments were performed in Duran phototubes ( $\phi = 1.0$  cm for racemic and enantioselective reactions and  $\phi = 1.8$  cm for 0.5 mmol scale reactions) under argon atmosphere in a positive geometry setup [cylindrical array of 16 fluorescent light tubes,  $\lambda = 420$  nm (Luzchem LZC-420, 8 W)]. Reactions at  $-25$  °C were performed inside a Duran cool finger which was attached to a cryostat (Huber CC410). Solvents used in the photochemical reactions were degassed under a continuous argon flow in an ultrasonication bath for 15 minutes. Flash chromatography was performed on silica 60 (Merck, 230-400 mesh) with the indicated eluent mixtures. Thin layer chromatography (TLC) was performed on silica coated glass plates (silica 60 F254) with detection by UV ( $\lambda = 254$  and 366 nm) and/or by staining with a potassiumpermanganate solution ( $\text{KMnO}_4$ ) followed by heat treatment. High performance liquid chromatography (HPLC) analyses were performed using a chiral stationary phase [ChiralPak AD-H (250 x 4.6 mm), Chiralpak OD-H (250 x 4.6 mm), Chiralpak AS-H (250 x 4.6 mm), *Daicel Chemical Industries*] with UVD 340 Photodiode Array Detector, P580 Pump and an ASI-100 Automated Sample Injector at 20 °C. Preparative HPLC was conducted on a apparatus consisting of a HPG 3200BX pump (*Thermo Fisher*) and a MWD 3000-RS UV-detector (*Dionex*). For normal-phase HPLC a *Daicel* ChiralPak AD-H, ChiralPak OD-H, and a ChiralPak AS-H was used as stationary phase and a mixture of *n*-heptane/*i*-propanol was used as mobile phase. Analytical gaschromatography was performed at a HP 6890 Series GC (*Agilent*, achiral stationary phase: HP-5 column, poly-dimethyl/diphenyl-siloxane, 95/5) with a flame ionisation detector. IR spectra were recorded on a *JASCO* IR-4100 (ATR).  $^1\text{H}$ ,  $^{13}\text{C}$ , and  $^{19}\text{F}$ -NMR spectra were recorded at 303 K either on a Bruker AVHD300, AVHD400, or AVHD500 spectrometer. NMR spectra were calibrated to the respective residual solvent signals of  $\text{CDCl}_3$  [ $\delta$  ( $^1\text{H}$ ) = 7.26 ppm,  $\delta$  ( $^{13}\text{C}$ ) = 77.16 ppm]. Apparent multiplets which occur as a result of coupling constant equality between magnetically non-equivalent protons are marked as virtual (*virt.*). The following abbreviations for single multiplicities were used: *br*-broad, *s*-singlet, *d*-doublet, *t*-triplet, *q*-quartet, *quint*-quintet, *sext*-sextet. High resolution mass spectroscopy (HR-MS) was performed on a *Thermo Scientific* LTQ-FT Ultra (ESI) or a *Thermo Scientific* DFS-HRMS spectrometer (EI). Melting points were measured on a *Büchi* M-565 instrument and are not corrected. Specific rotations were determined with a ADP440+ polarimeter. Optical rotation was measured using a Perkin-Elmer 241 MC polarimeter in a 1.00 dm cuvette at 589 nm (Na D-Line) at room temperature. The specific rotation was calculated with the Drude equation.  $[\alpha]_D^T$  and is given in  $10^1$  grad  $\text{cm}^2$   $\text{g}^{-1}$ .

## 2. Emission Spectrum of the Light Source

Lehrstuhl OC 1 - TUM

200 nm 250 nm 300 nm 350 nm 400 nm 450 nm 500 nm 550 nm 600 nm 650 nm

### Datasheet FLT022

LZC-420

#### Basic Information

|                               |                        |
|-------------------------------|------------------------|
| Type                          | Fluorescent light tube |
| Description                   | Luzchem LZC-420        |
| Manufacturer / Supplier       | n/a / Luzchem          |
| Order number / Date of purch. | n/a / 07/2017          |
| Internal lot / serial number  | 2017-07 / FLT022       |

#### Specification Manufacturer

|                          |                               |
|--------------------------|-------------------------------|
| Type / size              | T5 tube, G5 socket            |
| Mechanical specification | 16 mm diameter, 288 mm length |
| Electrical specification | 8 W                           |
| Wavelength (range, typ.) | 400 - 440 nm                  |
| Spectral width (FWHM)    | ~ 30 nm                       |
| Datasheet                | LES-420-016                   |

#### Characterization

|                                      |                                                                                                                                                                                                        |                                        |
|--------------------------------------|--------------------------------------------------------------------------------------------------------------------------------------------------------------------------------------------------------|----------------------------------------|
| Description of measurement           | Measured with Ocean-optics USB4000 spectrometer using a calibrated setup (cosine corrector/fibre).<br>The cosine corrector was placed at 20 mm distance from a single fluorescent tube at half height. |                                        |
| Measured dominant wavelength / Int.  | 421 nm                                                                                                                                                                                                 | 121 $\mu\text{W}/\text{mm}^2\text{nm}$ |
| Measured spectral width (FWHM)       | 30 nm                                                                                                                                                                                                  |                                        |
| Integral Reference intensity / range | 4142 $\mu\text{W}/\text{cm}^2$                                                                                                                                                                         | 350-500 nm                             |

#### Spectrum

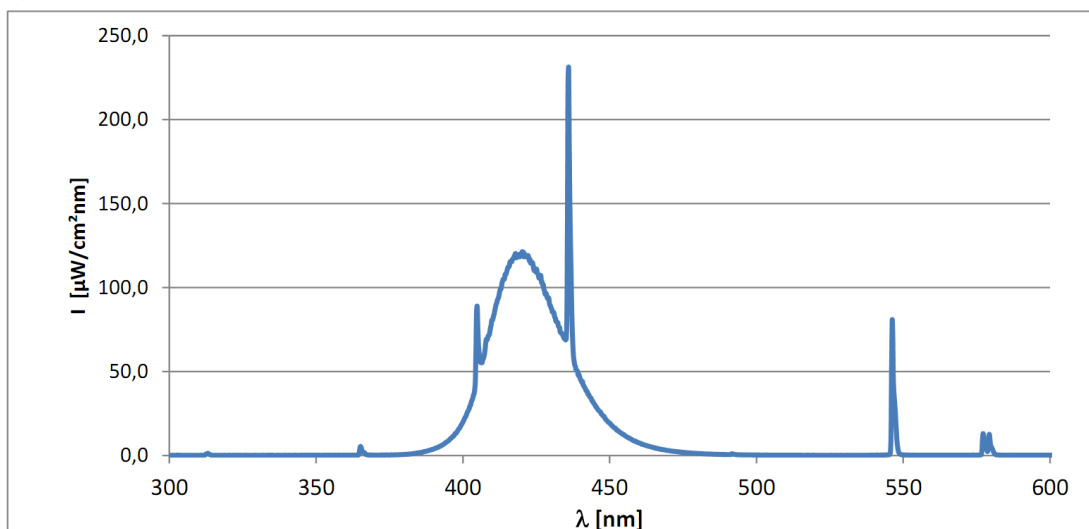

### 3. Optimization of Irradiation Conditions

**Table S1.** Optimization of the enantioselective [2 + 2] photocycloaddition of 4-alkenyloxyquinolones

$5a, R = H$   
 $5b, R = Me$

$6$  (x mol%)  
 $h\nu (\lambda = 420 \text{ nm})$   
 $PhCF_3 [c = 2.5 \text{ mM}]$   
 $Ar, T, t$

$7a$   
 $7b$

| Entry          | Sub.      | <b>6</b> (x mol%) | T [°C] | <i>t</i> [h] | Yield [%] | ee [%] |
|----------------|-----------|-------------------|--------|--------------|-----------|--------|
| 1              | <b>5a</b> | 10                | 25     | 1            | 0         | --     |
| 2              | <b>5b</b> | 10                | 25     | 1            | 98        | 72     |
| 3              | <b>5b</b> | 10                | -25    | 1            | 97        | 88     |
| 4              | <b>5b</b> | 5                 | -25    | 1.5          | 97        | 86     |
| 5              | <b>5b</b> | 2.5               | -25    | 2.5          | 97        | 86     |
| 6 <sup>a</sup> | <b>5b</b> | 1                 | -25    | 4            | 91        | 83     |
| 7 <sup>b</sup> | <b>5b</b> | 10                | -25    | 1            | 98        | 55     |

<sup>a</sup> The reaction was performed at a concentration of  $c = 5 \text{ mM}$ . <sup>b</sup> The reaction was performed in MeCN.

### 4. Screening of Catalyst Loadings

**Table S2.** [2+2] photocycloaddition of substrate **5n** to cyclobutane **7n**: Efficiency of sensitizer **6** at low catalyst loadings.

$5n$   
 $0.5 \text{ mmol (130.6 mg)}$

$6$  (x mol%)  
 $h\nu (\lambda = 420 \text{ nm})$   
 $PhCF_3 [c]$   
 $-25^\circ C, t$

$7n$

| Entry | <b>6</b> (x mol%) | <i>c</i> [mM] | <i>t</i> [h] | Yield [%] | ee [%] |
|-------|-------------------|---------------|--------------|-----------|--------|
| 1     | 10                | 2.5           | 1            | >99       | 99     |
| 2     | 1                 | 5             | 2.5          | >99       | 95     |
| 3     | 0.5               | 5             | 7            | 99        | 93     |



(**Entry 1**): **5n** (130.6 mg, 0.5 mmol) and **6** (21.6 mg, 0.05 mmol, 10 mol%) were dissolved in  $\alpha,\alpha,\alpha$ -trifluorotoluene (200 mL,  $c = 2.5$  mmol/L), cooled to  $-25$  °C and irradiated at  $\lambda = 420$  nm for 1 h. Following flash column chromatography (silica, pentane/ethyl acetate 4:1), compound **7n** was obtained as a colorless solid (130.5 mg, >99%, 99% *ee*).

(**Entry 2**): **5n** (130.6 mg, 0.5 mmol) and **6** (2.2 mg, 5  $\mu$ mol, 1 mol%) were dissolved in  $\alpha,\alpha,\alpha$ -trifluorotoluene (100 mL,  $c = 5$  mmol/L) and reacted for 2.5 h at  $-25$  °C. Following flash column chromatography, compound **7n** was obtained as a colorless solid (130.3 mg, >99%, 95% *ee*).

(**Entry 3**): **5n** (130.6 mg, 0.5 mmol) and **6** (1.1 mg, 2.5  $\mu$ mol, 0.5 mol%) were dissolved in  $\alpha,\alpha,\alpha$ -trifluorotoluene (100 mL,  $c = 5$  mmol/L) and reacted for 7 h at  $-25$  °C. Following flash column chromatography, compound **7n** was obtained as a colorless solid (129.5 mg, 99%, 93% *ee*).

**Scheme S1.** [2+2] photocycloaddition of substrate **5c** and **10b** to cyclobutane **7c** and **11b**: Efficiency of sensitizer **6** at low catalyst loadings.

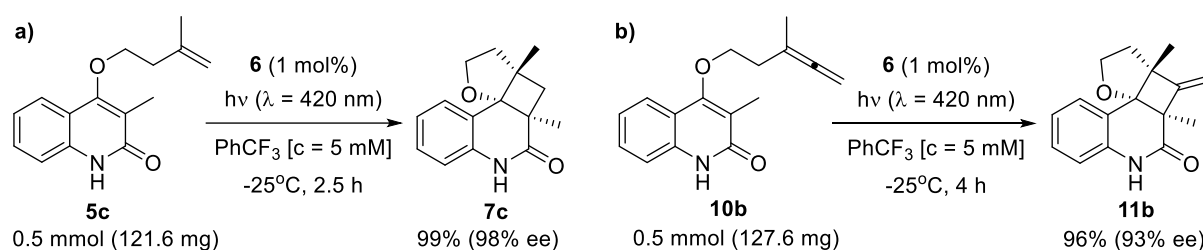

(**Scheme S1a**): **5c** (121.6 mg, 0.5 mmol) and **6** (2.2 mg, 5  $\mu$ mol, 1 mol%) were dissolved in  $\alpha,\alpha,\alpha$ -trifluorotoluene (100 mL,  $c = 5$  mmol/L), cooled to  $-25$  °C and irradiated at  $\lambda = 420$  nm for 2.5 h. Following flash column chromatography, compound **7c** was obtained as a colorless solid (120.5 mg, 99%, 98% *ee*).

(**Scheme S1b**): **10b** (127.6 mg, 0.5 mmol) and **6** (2.2 mg, 5  $\mu$ mol, 1 mol%) were dissolved in  $\alpha,\alpha,\alpha$ -trifluorotoluene (100 mL,  $c = 5$  mmol/L), cooled to  $-25$  °C and irradiated at  $\lambda = 420$  nm for 4 h. Following flash column chromatography, compound **11b** was obtained as a colorless solid (122.0 mg, 96%, 93% *ee*).

## 5. Emission Spectra and Triplet Energy of Quinolones

### General information

UV/Vis absorption spectra were measured on a Perkin Elmer Lambda 35 UV/Vis Spectrometer in quartz cuvettes. Emission spectra were recorded on a Horiba Scientific FluoroMax-4P Spectrofluorometer equipped with a continuous Xe source for steady state spectra and a Xe flashlight source for the observation of phosphorescence spectra. Spectra were recorded in quartz tubes (4 mm internal diameter) in a small quartz Dewar vessel which was filled with liquid nitrogen for recording spectra at cryogenic temperatures (77 K). Ethanol was filtered over silica and neutral aluminium oxide and subsequently distilled over a 20 cm vacuum insulated Vigreux column and was degassed prior to use. All solutions have been handled under dry nitrogen to exclude oxygen as triplet quencher.

## Quinolone characterization

Quinolone **5a** was dissolved in ethanol to give a 100  $\mu\text{M}$  solution. The absorption spectrum ( $d = 4$  mm) is shown in Figure S1a, normalized to the long-wavelength absorption maximum at  $\lambda = 315$  nm ( $\epsilon = 6625$   $\text{Lmol}^{-1}\text{cm}^{-1}$ ). Luminescence of a 100  $\mu\text{M}$  solution in ethanol after excitation at  $\lambda = 315$  nm was recorded in a quartz tube (4 mm internal diameter) and is shown normalized to the emission-maximum at  $\lambda = 360$  nm in Figure S1a. The emission is attributed to fluorescence and the crossing of the normalized spectra at  $\lambda = 336$  nm assigned to a  $S_1$  energy of 356 kJ/mol.

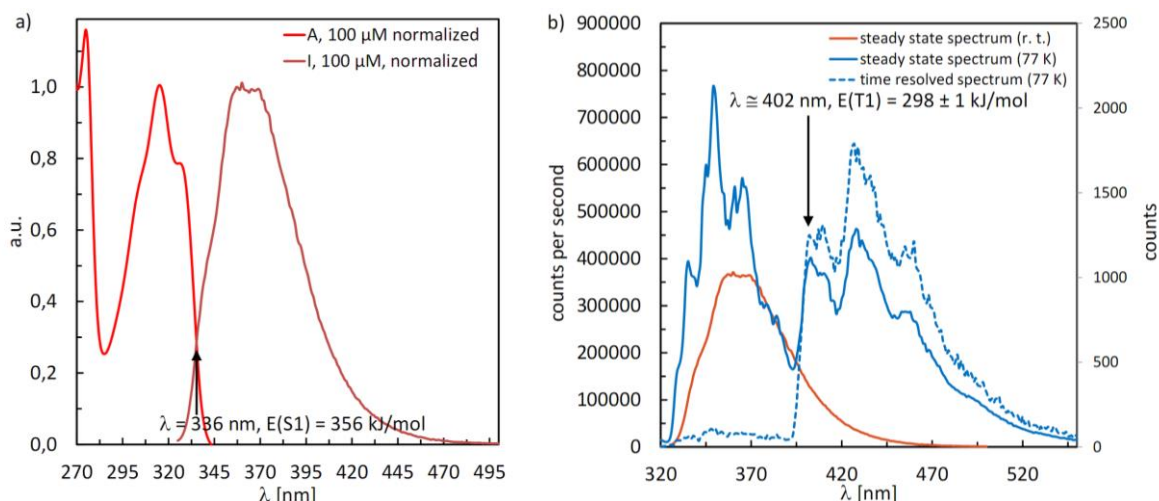

**Figure S1.** a) Recorded UV/Vis of **5a** in ethanol ( $c = 100$   $\mu\text{M}$ ) normalized to  $A_{315\text{ nm}}$ , recorded luminescence of **5a** in ethanol ( $c = 100$   $\mu\text{M}$ ) at ambient conditions, normalized to  $I_{360\text{ nm}}$ . b) Steady state spectra of **5a** in ethanol ( $c = 100$   $\mu\text{M}$ ) at ambient conditions and at 77 K given in counts per second (solid lines), time resolved spectrum of **5a** in ethanol ( $c = 100$   $\mu\text{M}$ ) after 250  $\mu\text{s}$  delay (counts, dashed line).

The solution of **5a** in ethanol was cooled to 77 K in a quartz tube to give an amorphous or microcrystalline solid (“snowy”). Excitation at  $\lambda = 312$  nm gave a spectrum, in which contributions from the previously recorded fluorescence spectrum can be qualitatively assigned together with a very broad and unstructured signature with a maximum at approx.  $\lambda = 430$  nm (Figure S1b). Introducing a delay between excitation and detection led to a complete bleach of signatures assigned to fluorescence and the resulting spectrum (Figure S1b, dashed line) was attributed to phosphorescence. Tentatively assigning the most blueshifted shoulder ( $\lambda_{\text{max}} \cong 402$  nm) to the  $0 \rightarrow 0$  transition of the phosphorescence allows to give an estimate for the triplet energy of  $298 \pm 1$  kJ/mol for **5a** in ethanol.

Excitation spectra were recorded under steady state at 77 K. The spectra match qualitatively the room temperature solution spectrum. The two major differences are a red shift of about 5 nm and an additional shoulder/feature at  $\sim 340$  nm. Figure S2 shows the excitation spectrum under steady state at 77 K and the room temperature solution spectra of **5a** in ethanol normalized to the respective local maxima.

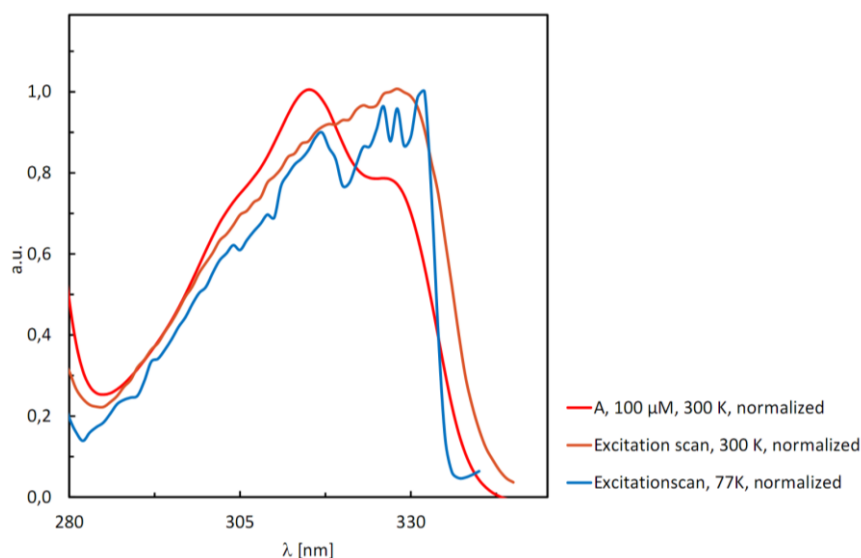

**Figure S2.** Recorded UV/Vis of **5a** in ethanol ( $c = 100 \mu\text{M}$ ) normalized to  $A_{315 \text{ nm}}$ , recorded steady state spectrum of **5a** in ethanol ( $c = 100 \mu\text{M}$ ) at 300 K and 77 K, normalized to the respective local maxima.

Quinolone **5b** was dissolved in ethanol to give a  $100 \mu\text{M}$  solution. The absorption spectrum ( $d = 4 \text{ mm}$ ) is shown in Figure S3a, normalized to the long-wavelength absorption maximum at  $\lambda = 322 \text{ nm}$  ( $\epsilon = 8847 \text{ Lmol}^{-1}\text{cm}^{-1}$ ). Luminescence of a  $100 \mu\text{M}$  solution in ethanol after excitation at  $\lambda = 322 \text{ nm}$  was recorded in a quartz tube (4 mm internal diameter) and is shown normalized to the emission-maximum at  $\lambda = 363 \text{ nm}$  in Figure S3a. The emission is attributed to fluorescence and the crossing of the normalized spectra at  $\lambda = 342 \text{ nm}$  assigned to a S1 energy of  $350 \text{ kJ/mol}$ .

The solution of **5b** in ethanol was cooled to 77 K in a quartz tube to give an amorphous or microcrystalline solid (“snowy”). Excitation at  $\lambda = 330 \text{ nm}$  gave a spectrum, in which contributions from the previously recorded fluorescence spectrum can be qualitatively assigned together with a very broad and unstructured signature with a maximum at approx.  $\lambda = 470 \text{ nm}$  (Figure S3b). Introducing a delay between excitation and detection led to a complete bleach of signatures assigned to fluorescence and the resulting spectrum (Figure S3b, dashed line) was attributed to phosphorescence. Tentatively assigning the most blueshifted shoulder ( $\lambda_{\text{max}} \cong 435\text{--}440 \text{ nm}$ ) to the  $0 \rightarrow 0$  transition of the phosphorescence allows to give an estimate for the triplet energy of  $273 \pm 2 \text{ kJ/mol}$  for **5b** in ethanol.

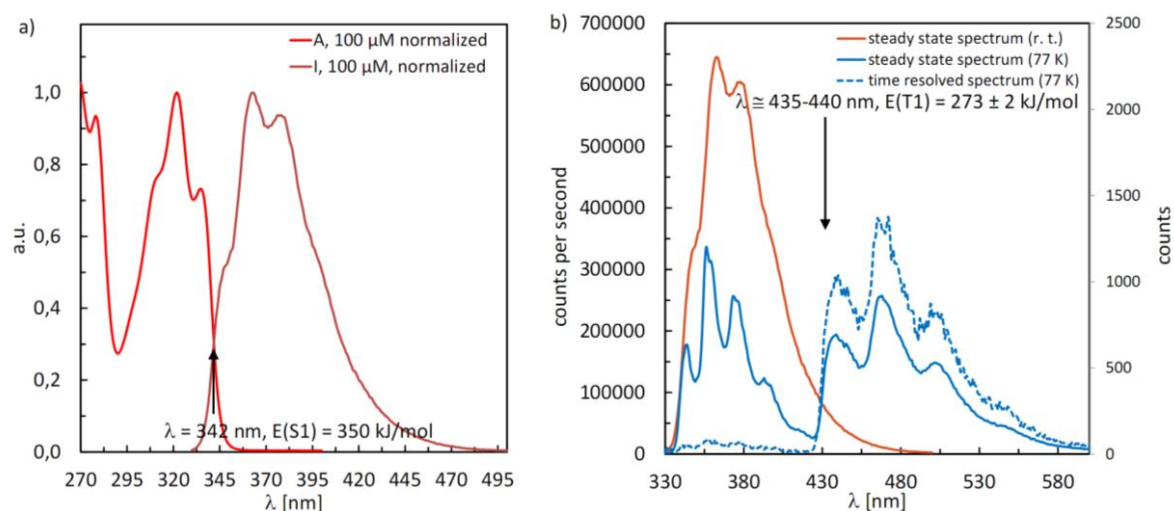

**Figure S3.** a) Recorded UV/Vis of **5b** in ethanol ( $c = 100 \mu\text{M}$ ) normalized to  $A_{322 \text{ nm}}$ , recorded luminescence of **5b** in ethanol ( $c = 100 \mu\text{M}$ ) at ambient conditions, normalized to  $I_{363 \text{ nm}}$ . b) Steady state spectra of **5b** in ethanol ( $c = 100 \mu\text{M}$ ) at ambient conditions and at 77 K given in counts per second (solid lines), time resolved spectrum of **5b** in ethanol ( $c = 100 \mu\text{M}$ ) after 250  $\mu\text{s}$  delay (counts, dashed line).

Excitation spectra were recorded under steady state at 77 K. The spectra match qualitatively the room temperature solution spectrum. The two major differences are a red shift of about 5 nm and an additional shoulder/feature at  $\sim 340 \text{ nm}$ . Figure S4 shows the excitation spectrum under steady state at 77 K and the room temperature solution spectra of **5b** in ethanol normalized to the respective local maxima.

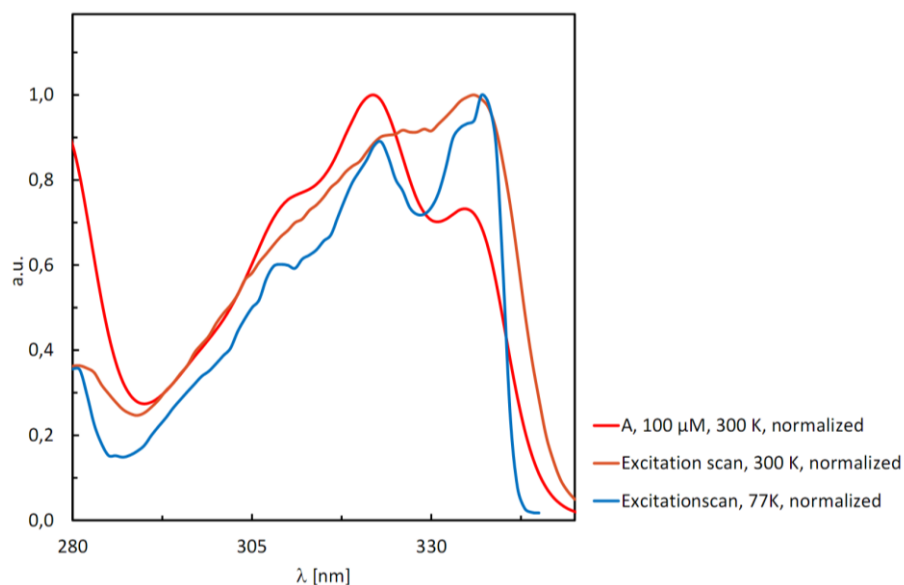

**Figure S4.** Recorded UV/Vis of **5b** in ethanol ( $c = 100 \mu\text{M}$ ) normalized to  $A_{322 \text{ nm}}$ , recorded steady state spectrum of **5b** in ethanol ( $c = 100 \mu\text{M}$ ) at 300 K and 77 K, normalized to the respective local maxima.

## 6. Synthetic Procedures and Analytical Data

The ether substrate **5a** was obtained following a literature procedure<sup>1</sup> starting from 4-chloroquinoline-*N*-oxide<sup>2</sup> and the commercially available alcohol. The substrates **5b** and **5c** for the photocycloaddition reaction was prepared as previously described<sup>1</sup> starting from 3-methylquinoline.

*General Procedure 1: Synthesis of ether substrates 5b and 5c by photochemical rearrangement of N-oxides*<sup>3</sup>

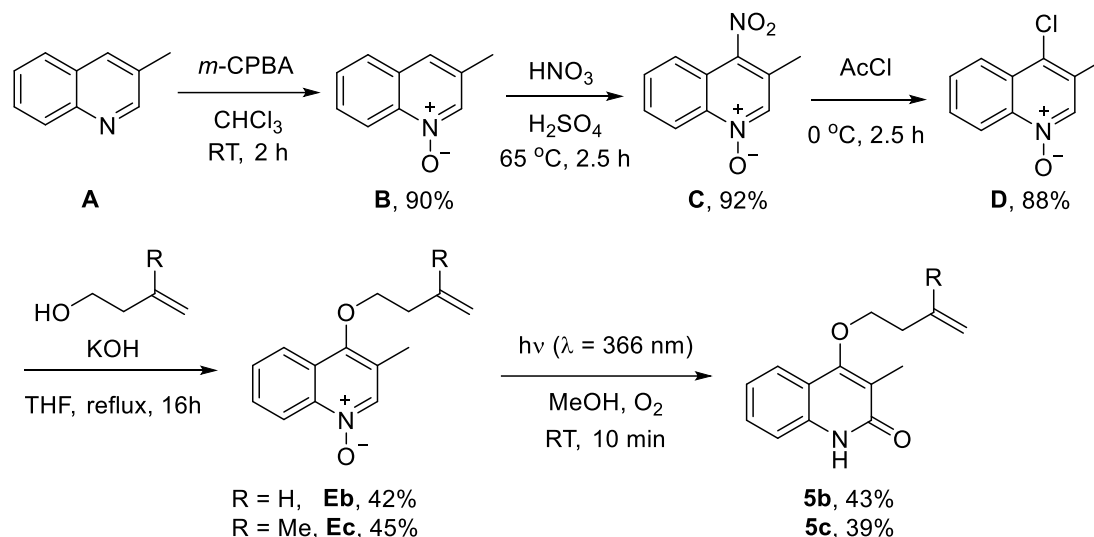

A solution of 3-methylquinoline (**A**) (2.86 g, 20 mmol) in 50 mL of chloroform was treated with *meta*-chloroperbenzoic acid (5.18 g, 30 mmol). The mixture was stirred for 2 h at room temperature. Subsequently, saturated NaHCO<sub>3</sub> (100 mL) and 2M NaOH (100 mL) were added and the mixture was extracted with dichloromethane. The combined organic layers were dried with Na<sub>2</sub>SO<sub>4</sub> and the solvent was removed at reduced pressure yielding the quinoline *N*-oxide **B** (2.87 g, 18 mmol, 90 %) as a bright yellow solid which was used in the following step without further purification.

To a solution of quinoline *N*-oxide **B** (2.87 g, 18 mmol) in 6.6 mL of concentrated sulfuric acid at 65 °C in an oil bath, 1.5 mL of 65% nitric acid solution was added dropwise over an hour. The reaction solution was stirred for another 2.5 hours at 65 °C and after cooling, carefully poured into 60 mL ice water. The solid precipitates were filtered off, washed with water until neutral and dried in a desiccator. The desired 4-nitroquinoline-*N*-oxide **C** (3.38 g, 16.6 mmol, 92%) was obtained as a yellow solid, which was used in the following step without further purification.

16.0 mL acetyl chloride (17.6 g, 224 mmol) was cooled to 0 °C and *N*-oxide **C** (2.37 g, 11.6 mmol) was added in portions over an hour, and the temperature must not rise above 10 °C. Then the solution stirred for another 2.5 hours in an ice bath and then added dropwise with ice water, until the highly exothermic hydrolysis of the excess acetyl chloride has ended. The reaction solution was mixed with potassium carbonate with vigorous stirring until the solution is basic and then extracted with dichloromethane (3 x 50 mL). The combined organic phases were washed with 50 mL saturated sodium chloride solution, dried over sodium sulfate, filtered and the solvent removed in vacuo. The crude product 4-chloro-3-methylquinoline 1-oxide (**D**) (1.97 g, 10.2 mmol, 88%) was obtained as a yellow solid, which can be further purified by recrystallization from acetone.

**4-chloro-3-methylquinoline 1-oxide (D):**

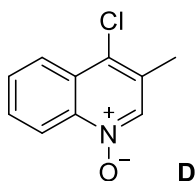

Chemical Formula: C<sub>10</sub>H<sub>8</sub>ClNO  
Exact Mass: 193.0294

**TLC:** R<sub>f</sub> = 0.51 (EtOAc:MeOH, 95:5) [UV].

**M.p.:** 164-166 °C.

**IR** (film)  $\nu_{\text{max}}/\text{cm}^{-1}$  3098, 3071, 1656, 1561, 1534, 1345, 1332, 1201, 1088, 1035, 919, 853, 770, 744, 658.

**<sup>1</sup>H NMR** (400 MHz, CDCl<sub>3</sub>)  $\delta$  8.72 (d, *J* = 8.3 Hz, 1H), 8.63 (s, 1H), 8.27 (d, *J* = 8.1 Hz, 1H), 7.82 (t, *J* = 7.6 Hz, 1H), 7.77 (t, *J* = 7.6 Hz, 1H), 2.55 (s, 3H).

**<sup>13</sup>C NMR** (101 MHz, CDCl<sub>3</sub>)  $\delta$  140.4, 137.4, 131.1, 130.6, 130.0, 129.6, 128.2, 124.9, 120.2, 18.0.

**GC-MS; EI** (70 eV): *t*<sub>R</sub> = 14.42 Min. [STDHT]; *m/z* (%) = 195 (34) [M+2+], 193 (100) [M+], 179 (17), 177 (52), 164 (14), 151 (34), 142 (37), 130 (29), 115 (34).

**HRMS (ESI)** *m/z*: [C<sub>10</sub>H<sub>8</sub>ClNO+H]<sup>+</sup> calcd.: 194.0367; found: 194.0367.

4-Chloroquinolin-*N*-oxide **D** (968 mg, 5 mmol) and powdered potassium hydroxide (560 mg, 10 mmol) were dissolved under argon in dry tetrahydrofuran (0.3 M). The appropriate alcohol (20 mmol) was added and the solution was heated to reflux in an oil bath until the reaction was complete. After cooling to room temperature the solvent was removed *in vacuo* and the residue was dissolved in dichloromethane (20 mL/mmol). The solution was washed with water (10 mL/mmol) and brine (10 mL/mmol), dried over Na<sub>2</sub>SO<sub>4</sub>, filtered and evaporated *in vacuo*. The crude product was purified by column chromatography.

**4-(but-3-en-1-yloxy)-3-methylquinoline 1-oxide (Eb):**

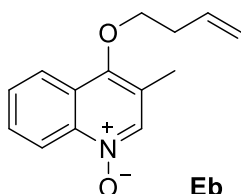

Chemical Formula: C<sub>14</sub>H<sub>15</sub>NO<sub>2</sub>  
Exact Mass: 229.1103

Following the general procedure, compound **Eb** was obtained as a light yellow oil (480 mg, 42%) by column chromatography (silica, DCM/MeOH 96:4).

**TLC:** R<sub>f</sub> = 0.37 (DCM:MeOH, 95:5) [UV].

**IR** (film)  $\nu_{\text{max}}/\text{cm}^{-1}$  3385, 3075, 2928, 1640, 1573, 1400, 1353, 1329, 1201, 1085, 968, 916, 872, 765, 733.

**<sup>1</sup>H NMR** (500 MHz, CDCl<sub>3</sub>)  $\delta$  8.66 (d, *J* = 8.7 Hz, 1H), 8.42 (s, 1H), 8.05 (d, *J* = 8.3 Hz, 1H), 7.71 (t, *J* = 7.7 Hz, 1H), 7.62 (t, *J* = 7.6 Hz, 1H), 5.96 (ddt, *J* = 17.1, 10.2, 6.8 Hz, 1H), 5.23 (dd, *J* = 17.2, 1.2 Hz, 1H), 5.18 (d, *J* = 10.2 Hz, 1H), 4.07 (t, *J* = 6.6 Hz, 2H), 2.65 (*virt. q*, *J* ≈ *J* = 6.6 Hz, 2H), 2.37 (s, 3H).

**<sup>13</sup>C NMR** (101 MHz, CDCl<sub>3</sub>)  $\delta$  152.2, 140.8, 138.6, 133.9, 129.9, 128.6, 125.6, 122.6, 120.2, 118.0, 74.1, 34.7, 13.9.

**GC-MS; EI** (70 eV): *t*<sub>R</sub> = 16.52 Min. [STDHT]; *m/z* (%) = 229 (21) [M+], 213 (74), 175 (37), 172 (38), 159 (93), 158 (39), 130 (57), 115 (24), 104 (22), 77 (32), 55 (100).

**HRMS (EI)** *m/z*: [C<sub>14</sub>H<sub>15</sub>NO<sub>2</sub>+H]<sup>+</sup> calcd.: 230.1176; found: 230.1176.

**3-methyl-4-((3-methylbut-3-en-1-yl)oxy)quinoline 1-oxide (Ec):**

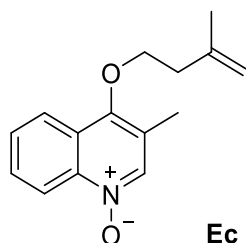

Chemical Formula: C<sub>15</sub>H<sub>17</sub>NO<sub>2</sub>  
Exact Mass: 243.1259

**Ec**

Following the general procedure, compound **Ec** was obtained as a light-yellow oil (545 mg, 45%) by column chromatography (silica, DCM/MeOH 96:4).

**TLC:** R<sub>f</sub> = 0.39 (DCM:MeOH, 95:5) [UV].

**IR** (film)  $\nu_{\text{max}}/\text{cm}^{-1}$  3385, 3075, 2933, 1650, 1573, 1450, 1400, 1353, 1329, 1262, 1200, 1085, 975, 890, 866, 765, 731.

**<sup>1</sup>H NMR** (400 MHz, CDCl<sub>3</sub>)  $\delta$  8.67 (d, *J* = 8.7 Hz, 1H), 8.45 (s, 1H), 8.06 (d, *J* = 8.2 Hz, 1H), 7.72 (ddd, *J* = 8.4, 7.2, 1.2 Hz, 1H), 7.63 (ddd, *J* = 8.2, 7.6, 1.2 Hz, 1H), 4.92 (s, 1H), 4.87 (s, 1H), 4.16 (t, *J* = 6.8 Hz, 2H), 2.62 (t, *J* = 6.8 Hz, 2H), 2.39 (s, 3H), 1.84 (s, 3H).

**<sup>13</sup>C NMR** (101 MHz, CDCl<sub>3</sub>)  $\delta$  152.8, 141.5, 140.8, 138.9, 130.1, 128.7, 125.7, 122.7, 122.6, 120.2, 113.0, 73.4, 38.4, 22.9, 14.0.

**GC-MS; EI** (70 eV): *t*<sub>R</sub> = 17.02 Min. [STDHT]; *m/z* (%) = 243 (1) [M<sup>+</sup>], 227 (23), 159 (100), 130 (22), 115 (10), 77 (10), 69 (28).

**HRMS (EI)** *m/z*: [C<sub>15</sub>H<sub>17</sub>NO<sub>2</sub>+H]<sup>+</sup> calcd.: 244.1332; found: 244.1333.

The 4-alkenyloxyquinolin-*N*-oxide **E** was dissolved in methanol (200 mL/mmol), saturated with oxygen and run through a double coiled tubular flow reactor (Duran tube 7 mm, coil outer diameter: 75 mm, height: 200 mm, internal volume: 150 mL) placed in the middle of a Rayonet (RPR-100) photoreactor equipped with 16 lamps of the given wavelength. After passing the reactor, the product solution was collected in a septum stoppered flask which was filled with inert gas and equipped with a balloon for pressure equalization. Reaction progress was monitored by UV/VIS-spectrometry (flow-cuvette, detection of the *N*-oxide absorption band at  $\lambda > 360$  nm). The collected product solution was evaporated *in vacuo*. The crude product was purified by flash column chromatography and recrystallisation.

**4-(but-3-en-1-yloxy)-3-methylquinolin-2(1H)-one (5b):**

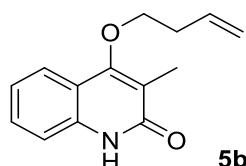

Chemical Formula: C<sub>14</sub>H<sub>15</sub>NO<sub>2</sub>  
Exact Mass: 229.1103

**5b**

Following the general procedure, compound **5b** was obtained as a colorless solid (148 mg, 43%) by column chromatography (silica, pentane/ethyl acetate 1.5:1).

**TLC:** R<sub>f</sub> = 0.44 (Pentane:EtOAc, 1:1) [UV].

**M.p.:** 152-153 °C.

**IR** (film)  $\nu_{\max}/\text{cm}^{-1}$  3065, 2944, 2876, 2852, 1638, 1613, 1569, 1497, 1433, 1373, 1353, 1271, 1157, 1144, 1107, 1015, 975, 915, 871, 755, 741, 697, 667.

**$^1\text{H}$  NMR** (400 MHz,  $\text{CDCl}_3$ )  $\delta$  11.86 (*br s*, 1H), 7.79 (dd,  $J = 8.0, 0.8$  Hz, 1H), 7.48 (ddd,  $J = 8.4, 7.0, 1.4$  Hz, 1H), 7.41 (dd,  $J = 8.2, 1.2$  Hz, 1H), 7.22 (ddd,  $J = 8.2, 7.1, 1.3$  Hz, 1H), 5.98 (ddt,  $J = 17.0, 10.2, 6.8$  Hz, 1H), 5.24 (*virt. dq*,  $J = 17.2$  Hz,  $J \approx J = 1.6$  Hz, 1H), 5.18 (*virt. dq*,  $J = 10.3$  Hz,  $J \approx J = 1.6$  Hz, 1H), 4.09 (t,  $J = 6.7$  Hz, 2H), 2.66 (*virt. qt*,  $J \approx J = 6.7$  Hz,  $J = 1.4$  Hz, 2H), 2.25 (s, 3H).

**$^{13}\text{C}$  NMR** (101 MHz,  $\text{CDCl}_3$ )  $\delta$  166.3, 161.5, 137.3, 134.2, 130.1, 122.9, 122.4, 118.8, 117.8, 117.7, 116.0, 73.2, 34.9, 10.4.

**GC-MS; EI** (70 eV):  $t_R = 15.90$  Min. [STDHT];  $m/z$  (%) = 229 (18) [ $\text{M}^+$ ], 214 (35), 175 (100), 146 (17), 130 (13), 120 (20), 55 (48).

**HRMS (ESI)**  $m/z$ : [ $\text{C}_{14}\text{H}_{15}\text{NO}_2 + \text{H}$ ] $^+$  calcd.: 230.1176; found: 230.1177.

**3-methyl-4-((3-methylbut-3-en-1-yl)oxy)quinolin-2(1H)-one (5c):**

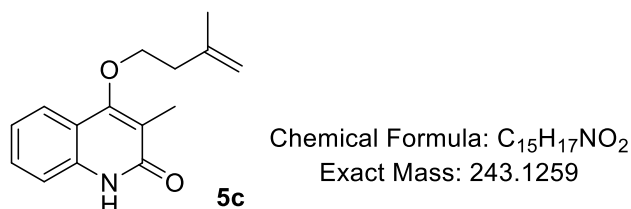

Following the general procedure, compound **5c** was obtained as a colorless solid (142 mg, 39%) by column chromatography (silica, pentane/ethyl acetate 1.5:1).

**TLC:**  $R_f = 0.36$  (Pentane:EtOAc, 1:1) [UV].

**M.p.:** 114–115 °C.

**IR** (film)  $\nu_{\max}/\text{cm}^{-1}$  3067, 2948, 2917, 2870, 1646, 1611, 1572, 1434, 1348, 1266, 1144, 1103, 1031, 979, 896, 837, 746, 698, 689.

**$^1\text{H}$  NMR** (500 MHz,  $\text{CDCl}_3$ )  $\delta$  12.16 (*br s*, 1H), 7.79 (d,  $J = 8.0$  Hz, 1H), 7.48 (t,  $J = 7.5$  Hz, 1H), 7.44 (d,  $J = 8.0$  Hz, 1H), 7.21 (t,  $J = 7.5$  Hz, 1H), 4.91 (s, 1H), 4.87 (s, 1H), 4.15 (t,  $J = 6.9$  Hz, 2H), 2.62 (t,  $J = 6.9$  Hz, 1H), 2.26 (s, 3H), 1.85 (s, 3H).

**$^{13}\text{C}$  NMR** (101 MHz,  $\text{CDCl}_3$ )  $\delta$  166.4, 161.6, 141.8, 137.3, 130.0, 122.8, 122.4, 118.7, 117.7, 116.1, 112.8, 72.3, 38.5, 22.9, 10.4.

**GC-MS; EI** (70 eV):  $t_R = 16.45$  Min. [STDHT];  $m/z$  (%) = 243 (20) [ $\text{M}^+$ ], 175 (100), 146 (10), 120 (12), 69 (25).

**HRMS (ESI)**  $m/z$ : [ $\text{C}_{15}\text{H}_{17}\text{NO}_2 + \text{H}$ ] $^+$  calcd.: 244.1332; found: 244.1334.

*General Procedure 2: Synthesis of ether substrates 5, 8, 10, 12, and 15 by Mitsunobu reactions* <sup>4</sup>



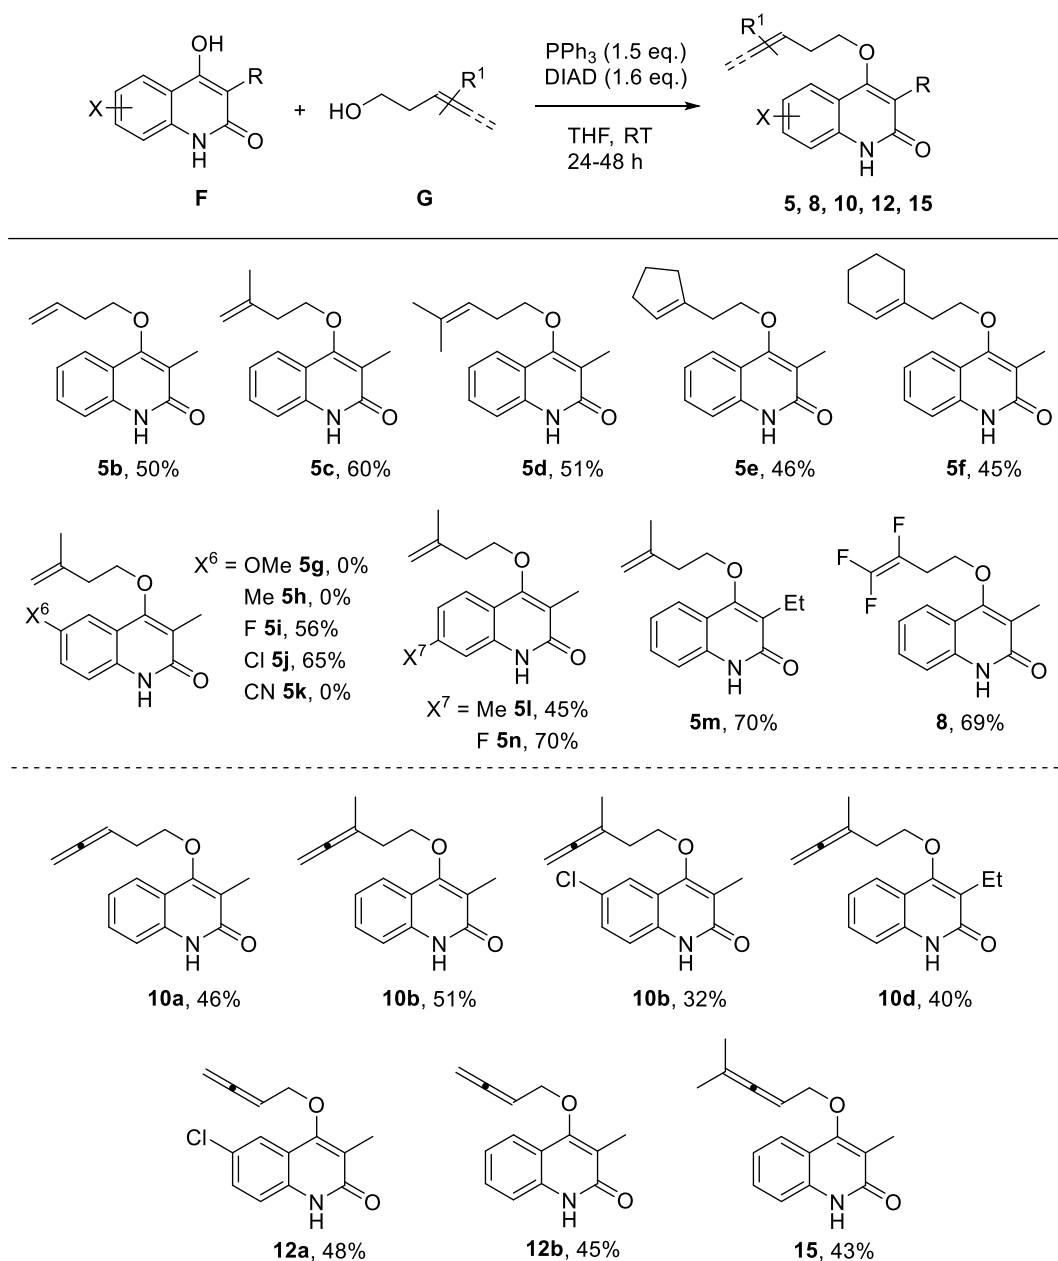

A flask was charged with 4-hydroxy-2-quinolone<sup>5</sup> **F** (2.0 mmol) and triphenylphosphine (3.0 mmol, 786 mg) under an inert atmosphere. After solvation in dry THF (4 mL) alcohol **G** (3.0 mmol) was added and the stirred solution was cooled by an external ice/water bath. Diisopropyl azodicarboxylate (3.2 mmol, 647 mg) was added dropwise and the solution was allowed to come to room temperature and stirred for additional 24-48 h. After evaporation of the solvent under reduced pressure, the residue was purified by silica gel flash chromatography.

*General Procedure 3: Synthesis of ether substrates **5g**, **5h**, and **5k** by nucleophilic substitution<sup>6</sup>*

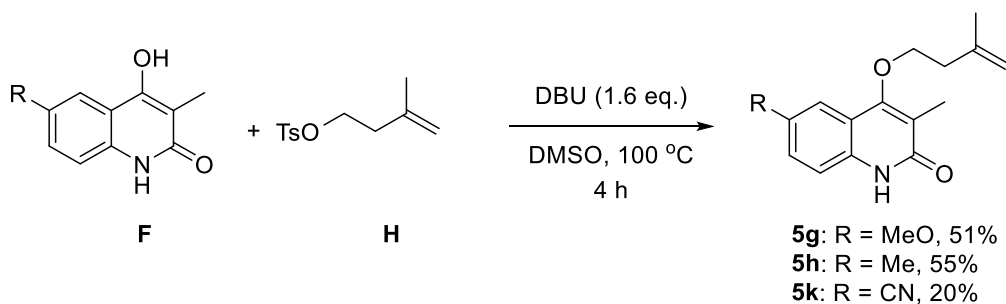

3-Methylbut-3-en-1-yl 4-methylbenzenesulfonate **H** (1.25 eq) was added dropwise to a solution of 4-hydroxy-2-methylquinolin-3(1H)-one<sup>5</sup> **F** (1 eq) and DBU (1.56 eq) in DMSO (0.25 mol/L) and the mixture was stirred at 100 °C in an oil bath for 4 h. The solvent was dissolved in dichloromethane, washed successively with 0.5 N NaOH, 0.1 N HCl and water, and dried over sodium sulfate. After removal of the solvent, the crude product was purified by flash column chromatography.

### 3-methyl-4-((4-methylpent-3-en-1-yl)oxy)quinolin-2(1H)-one (**5d**):

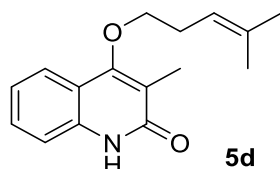

Chemical Formula: C<sub>16</sub>H<sub>19</sub>NO<sub>2</sub>  
Exact Mass: 257.1416

Following the *general procedure 2*, compound **5d** was obtained as a colorless solid (260 mg, 51%) by column chromatography (silica, pentane/diethyl ether 1:1.5).

**TLC**: R<sub>f</sub> = 0.54 (Pentane:EtOAc, 1:2) [UV].

**M.p.**: 109-110 °C.

**IR** (film)  $\nu_{\text{max}}/\text{cm}^{-1}$  3071, 2961, 2868, 1658, 1614, 1574, 1500, 1436, 1354, 1265, 1144, 1100, 1012, 975, 883, 836, 748, 737, 692, 666.

**<sup>1</sup>H NMR** (500 MHz, CDCl<sub>3</sub>)  $\delta$  12.10 (*br s*, 1H), 7.80 (*d*, *J* = 8.0 Hz, 1H), 7.47 (*t*, *J* = 7.5 Hz, 1H), 7.43 (*d*, *J* = 8.0 Hz, 1H), 7.21 (*t*, *J* = 7.5 Hz, 1H), 5.27 (*t*, *J* = 7.0 Hz, 1H), 4.01 (*t*, *J* = 7.0 Hz, 2H), 2.59 (*virt. q*, *J*  $\approx$  *J* = 7.0 Hz, 2H), 2.25 (*s*, 3H), 1.76 (*s*, 3H), 1.69 (*s*, 3H).

**<sup>13</sup>C NMR** (75 MHz, CDCl<sub>3</sub>)  $\delta$  161.7, 137.3, 135.1, 130.0, 122.9, 122.3, 119.5, 117.8, 116.1, 73.7, 29.4, 25.9, 18.1, 10.3.

**GC-MS; EI** (70 eV): *t<sub>R</sub>* = 17.08 Min. [STDHT]; *m/z* (%) = 257 (2) [M<sup>+</sup>], 242 (98), 175 (60), 83 (77), 55 (100).

**HRMS (ESI)** *m/z*: [C<sub>16</sub>H<sub>19</sub>NO<sub>2</sub>+H]<sup>+</sup> calcd.: 258.1489; found: 258.1490.

### 4-(2-(cyclopent-1-en-1-yl)ethoxy)-3-methylquinolin-2(1H)-one (**5e**):

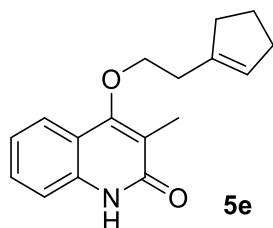

Chemical Formula: C<sub>17</sub>H<sub>19</sub>NO<sub>2</sub>  
Exact Mass: 269.1416

Following the *general procedure 2*, compound **5e** was obtained as a colorless solid (247 mg, 46%) by column chromatography (silica, pentane/diethyl ether 1:2).

**TLC:**  $R_f$  = 0.34 (Pentane:EtOAc, 1:1) [UV].

**M.p.:** 141-142 °C.

**IR** (film)  $\nu_{\max}/\text{cm}^{-1}$  3158, 3065, 2946, 2890, 2846, 1644, 1610, 1571, 1498, 1432, 1373, 1356, 1316, 1270, 1262, 1181, 1155, 1143, 1032, 970, 946, 898, 858, 751, 689, 659.

**$^1\text{H}$  NMR** (500 MHz,  $\text{CDCl}_3$ )  $\delta$  12.25 (*br s*, 1H), 7.78 (d,  $J$  = 7.7 Hz, 1H), 7.47 (ddd,  $J$  = 8.2, 6.6, 1.5 Hz, 1H), 7.45 (dd,  $J$  = 8.2, 1.5 Hz, 1H), 7.20 (ddd,  $J$  = 8.2, 6.6, 1.5 Hz, 1H), 5.58-5.49 (m, 1H), 4.16 (t,  $J$  = 6.9 Hz, 2H), 2.68 (t,  $J$  = 6.9 Hz, 2H), 2.41-2.29 (m, 4H), 2.26 (s, 3H), 1.90 (*virt. quint*,  $J \approx J$  = 7.5 Hz, 2H).

**$^{13}\text{C}$  NMR** (101 MHz,  $\text{CDCl}_3$ )  $\delta$  166.5, 161.6, 140.3, 137.3, 130.0, 126.3, 122.8, 122.3, 118.6, 117.7, 116.1, 72.5, 35.5, 32.7, 32.2, 23.5, 10.4.

**GC-MS; EI** (70 eV):  $t_R$  = 18.19 Min. [STDHT];  $m/z$  (%) = 269 (11) [ $\text{M}^+$ ], 176 (100), 175 (47), 146 (8), 130 (9), 95 (57), 79 (16), 67 (24).

**HRMS (ESI)**  $m/z$ : [ $\text{C}_{17}\text{H}_{19}\text{NO}_2 + \text{H}$ ] $^+$  calcd.: 270.1489; found: 270.1490.

#### 4-(2-(cyclohex-1-en-1-yl)ethoxy)-3-methylquinolin-2(1H)-one (**5f**):

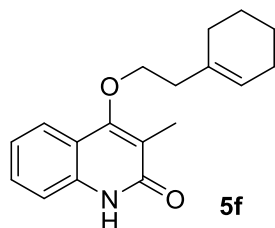

Chemical Formula:  $\text{C}_{18}\text{H}_{21}\text{NO}_2$   
Exact Mass: 283.1572

Following the *general procedure 2*, compound **5f** was obtained as a colorless solid (254 mg, 45%) by column chromatography (silica, pentane/diethyl ether 1:2).

**TLC:**  $R_f$  = 0.39 (Pentane:EtOAc, 1:1) [UV].

**M.p.:** 137-138 °C.

**IR** (film)  $\nu_{\max}/\text{cm}^{-1}$  3002, 2912, 2833, 1648, 1615, 1574, 1501, 1436, 1382, 1356, 1319, 1270, 1156, 1142, 1103, 1014, 986, 945, 910, 861, 748, 700, 655.

**$^1\text{H}$  NMR** (400 MHz,  $\text{CDCl}_3$ )  $\delta$  11.64 (*br s*, 1H), 7.80 (d,  $J$  = 7.9 Hz, 1H), 7.47 (t,  $J$  = 7.6 Hz, 1H), 7.38 (d,  $J$  = 8.0 Hz, 1H), 7.21 (t,  $J$  = 7.5 Hz, 1H), 5.60 (s, 1H), 4.10 (t,  $J$  = 6.9 Hz, 2H), 2.53 (t,  $J$  = 6.8 Hz, 2H), 2.25 (s, 3H), 2.03-2.02 (m, 4H), 1.69-1.62 (m, 2H), 1.62-1.54 (m, 2H).

**$^{13}\text{C}$  NMR** (101 MHz,  $\text{CDCl}_3$ )  $\delta$  166.2, 161.7, 137.2, 133.8, 130.0, 124.3, 123.0, 122.3, 118.6, 117.8, 115.9, 72.6, 38.9, 28.7, 25.5, 23.1, 22.5, 10.4.

**GC-MS; EI** (70 eV):  $t_R$  = 17.03 Min. [STDHT];  $m/z$  (%) = 283 (21) [ $\text{M}^+$ ], 176 (100), 175 (64), 109 (48), 67 (41).

**HRMS (ESI)**  $m/z$ : [ $\text{C}_{18}\text{H}_{21}\text{NO}_2 + \text{H}$ ] $^+$  calcd.: 284.1645; found: 284.1646.

#### 6-methoxy-3-methyl-4-((3-methylbut-3-en-1-yl)oxy)quinolin-2(1H)-one (**5g**):

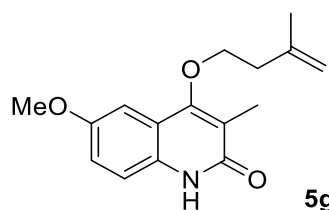

Chemical Formula: C<sub>16</sub>H<sub>19</sub>NO<sub>3</sub>  
Exact Mass: 273.1365

**5g**

Following the *general procedure 3*, compound **5g** was obtained as a colorless solid (254 mg, 51%) by column chromatography (silica, pentane/ethyl acetate 1:1).

**TLC:** R<sub>f</sub> = 0.43 (Pentane:EtOAc, 1:1.5) [UV].

**M.p.:** 145-146 °C.

**IR** (film)  $\nu_{\text{max}}/\text{cm}^{-1}$  2999, 2916, 2868, 2826, 1643, 1621, 1579, 1499, 1418, 1370, 1352, 1272, 1218, 1172, 1143, 1105, 1036, 902, 891, 841, 708.

**<sup>1</sup>H NMR** (500 MHz, CDCl<sub>3</sub>)  $\delta$  11.45 (*br s*, 1H), 7.30 (d, *J* = 8.9 Hz, 1H), 7.23 (d, *J* = 2.7 Hz, 1H), 7.11 (dd, *J* = 8.9, 2.7 Hz, 1H), 4.93 (s, 1H), 4.90 (s, 1H), 4.15 (t, *J* = 6.7 Hz, 2H), 3.86 (s, 3H), 2.61 (t, *J* = 6.7 Hz, 2H), 2.25 (s, 3H), 1.86 (s, 3H).

**<sup>13</sup>C NMR** (101 MHz, CDCl<sub>3</sub>)  $\delta$  165.6, 161.1, 155.3, 142.0, 131.8, 119.5, 119.0, 118.4, 117.3, 112.9, 104.3, 72.0, 55.8, 38.5, 22.9, 10.5.

**GC-MS; EI** (70 eV): *t*<sub>R</sub> = 16.11 Min. [STDHT]; *m/z* (%) = 273 (69) [M<sup>+</sup>], 258 (4), 228 (8), 205 (100), 190 (25), 176 (8), 69 (19).

**HRMS (ESI)** *m/z*: [C<sub>16</sub>H<sub>19</sub>NO<sub>3</sub>+H]<sup>+</sup> calcd.: 274.1438; found: 274.1439.

**3,6-dimethyl-4-((3-methylbut-3-en-1-yl)oxy)quinolin-2(1H)-one (5h):**

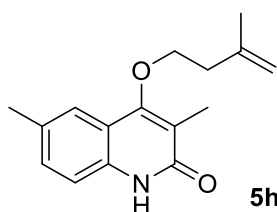

Chemical Formula: C<sub>16</sub>H<sub>19</sub>NO<sub>2</sub>  
Exact Mass: 257.1416

**5h**

Following the *general procedure 3*, compound **5h** was obtained as a colorless solid (282 mg, 55%) by column chromatography (silica, pentane/ethyl acetate 1:1).

**TLC:** R<sub>f</sub> = 0.48 (Pentane:EtOAc, 1:2) [UV].

**M.p.:** 155-156 °C.

**IR** (film)  $\nu_{\text{max}}/\text{cm}^{-1}$  2965, 2853, 1656, 1579, 1505, 1480, 1421, 1378, 1356, 1310, 1270, 1257, 1172, 1111, 1004, 917, 880, 810, 774, 711, 653.

**<sup>1</sup>H NMR** (400 MHz, CDCl<sub>3</sub>)  $\delta$  12.24 (*br s*, 1H), 7.56 (s, 1H), 7.35 (d, *J* = 8.3 Hz, 1H), 7.29 (dd, *J* = 8.3, 1.6 Hz, 1H), 4.92 (s, 1H), 4.89 (s, 1H), 4.13 (t, *J* = 6.9 Hz, 2H), 2.62 (t, *J* = 6.8 Hz, 2H), 2.42 (s, 3H), 2.25 (s, 3H), 1.86 (s, 3H).

**<sup>13</sup>C NMR** (101 MHz, CDCl<sub>3</sub>)  $\delta$  166.3, 161.4, 141.9, 135.4, 131.8, 131.4, 122.3, 118.6, 117.6, 116.1, 112.9, 72.1, 38.5, 22.9, 21.3, 10.4.

**GC-MS; EI** (70 eV): *t*<sub>R</sub> = 16.88 Min. [STDHT]; *m/z* (%) = 257 (26) [M<sup>+</sup>], 212 (6), 189 (100), 160 (11), 134 (9), 69 (18).

**HRMS (ESI)** *m/z*: [C<sub>16</sub>H<sub>19</sub>NO<sub>2</sub>+H]<sup>+</sup> calcd.: 258.1489; found: 258.1489.

**6-fluoro-3-methyl-4-((3-methylbut-3-en-1-yl)oxy)quinolin-2(1H)-one (5i):**

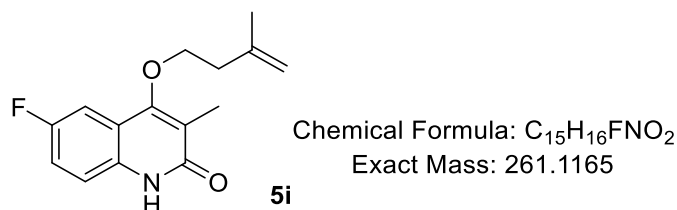

Following the *general procedure 2*, compound **5i** was obtained as a colorless solid (292 mg, 56%) by column chromatography (silica, pentane/diethyl ether 1:2).

**TLC:** R<sub>f</sub> = 0.28 (Pentane:EtOAc, 1:1) [UV].

**M.p.:** 148-149 °C.

**IR** (film)  $\nu_{\text{max}}/\text{cm}^{-1}$  2929, 2881, 2828, 1651, 1631, 1502, 1428, 1353, 1308, 1251, 1188, 1168, 1135, 1097, 1031, 940, 908, 893, 876, 843, 813, 790, 712.

**<sup>1</sup>H NMR** (400 MHz, CDCl<sub>3</sub>)  $\delta$  12.82 (*br s*, 1H), 7.52-7.35 (m, 2H), 7.21 (td, *J* = 8.5, 2.8 Hz, 1H), 4.93 (s, 1H), 4.88 (s, 1H), 4.13 (t, *J* = 6.8 Hz, 2H), 2.60 (t, *J* = 6.8 Hz, 2H), 2.24 (s, 3H), 1.85 (s, 3H).

**<sup>19</sup>F NMR** (376 MHz, CDCl<sub>3</sub>)  $\delta$  -119.8.

**<sup>13</sup>C NMR** (101 MHz, CDCl<sub>3</sub>)  $\delta$  166.4, 160.9 (d, *J* = 3.3 Hz), 158.4 (d, *J* = 240.9 Hz), 141.6, 133.8, 119.6, 118.6 (d, *J* = 8.4 Hz), 118.3 (d, *J* = 24.8 Hz), 117.9 (d, *J* = 8.1 Hz), 113.0, 108.0 (d, *J* = 24.2 Hz), 72.3, 38.4, 22.8, 10.5.

**GC-MS; EI** (70 eV): *t*<sub>R</sub> = 16.36 Min. [STDHT]; *m/z* (%) = 261 (28) [M<sup>+</sup>], 246 (4), 216 (5), 193 (100), 164 (12), 138 (9), 69 (40).

**HRMS (ESI)** *m/z*: [C<sub>15</sub>H<sub>16</sub>FNO<sub>2</sub>+H]<sup>+</sup> calcd.: 262.1238; found: 262.1238.

**6-chloro-3-methyl-4-((3-methylbut-3-en-1-yl)oxy)quinolin-2(1H)-one (5j):**

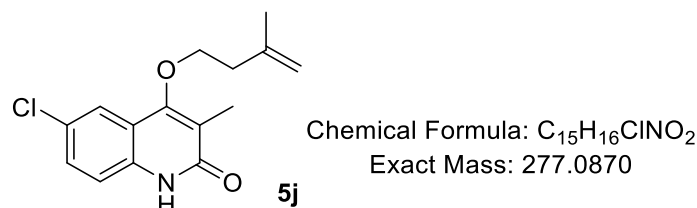

Following the *general procedure 2*, compound **5j** was obtained as a colorless solid (360 mg, 65%) by column chromatography (silica, pentane/diethyl ether 1:2).

**TLC:** R<sub>f</sub> = 0.35 (Pentane:EtOAc, 1:1) [UV].

**M.p.:** 172-174 °C.

**IR** (film)  $\nu_{\text{max}}/\text{cm}^{-1}$  2985, 2966, 2922, 2884, 2852, 2737, 1656, 1608, 1573, 1479, 1445, 1416, 1375, 1351, 1307, 1263, 1235, 1179, 1146, 1116, 1077, 978, 967, 881, 810, 701.

**<sup>1</sup>H NMR** (400 MHz, CDCl<sub>3</sub>)  $\delta$  12.45 (*br s*, 1H), 7.76 (d, *J* = 2.0 Hz, 1H), 7.42 (dd, *J* = 8.7, 2.1 Hz, 1H), 7.38 (d, *J* = 8.7 Hz, 1H), 4.94 (s, 1H), 4.89 (s, 1H), 4.14 (t, *J* = 6.8 Hz, 2H), 2.61 (t, *J* = 6.7 Hz, 2H), 2.24 (s, 3H), 1.86 (s, 3H).

**<sup>13</sup>C NMR** (101 MHz, CDCl<sub>3</sub>)  $\delta$  166.4, 160.6, 141.6, 135.7, 130.3, 128.0, 122.3, 119.6, 118.9, 117.6, 113.2, 72.4, 38.5, 22.8, 10.5.

**GC-MS; EI** (70 eV):  $t_R$  = 17.34 Min. [STDHT];  $m/z$  (%) = 279 (8) [M+2+], 277 (26) [M+], 211 (33), 209 (100), 180 (9), 154 (9), 69 (60).

**HRMS (ESI)**  $m/z$ : [C<sub>15</sub>H<sub>16</sub>ClNO<sub>2</sub>+H]<sup>+</sup> calcd.: 278.0942; found: 278.0944.

**3-methyl-4-((3-methylbut-3-en-1-yl)oxy)-2-oxo-1,2-dihydroquinoline-6-carbonitrile (5k):**

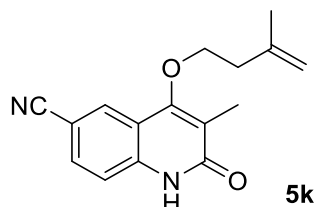

Chemical Formula: C<sub>16</sub>H<sub>16</sub>N<sub>2</sub>O<sub>2</sub>  
Exact Mass: 268.1212

**5k**

Following the *general procedure 3*, compound **5k** was obtained as a colorless solid (108 mg, 20%) by column chromatography (silica, pentane/ethyl acetate 1:1).

**TLC:**  $R_f$  = 0.27 (Pentane:EtOAc, 1:1) [UV].

**M.p.:** 232-235 °C.

**IR** (film)  $\nu_{max}/cm^{-1}$  3152, 2977, 2920, 2851, 2228, 1652, 1624, 1578, 1478, 1423, 1377, 1351, 1319, 1274, 1261, 1168, 1111, 972, 890, 821, 763, 715, 652.

**<sup>1</sup>H NMR** (400 MHz, CDCl<sub>3</sub>)  $\delta$  12.25 (*br s*, 1H), 8.15 (d,  $J$  = 1.5 Hz, 1H), 7.70 (dd,  $J$  = 8.5, 1.7 Hz, 1H), 7.47 (d,  $J$  = 8.5 Hz, 1H), 4.96 (s, 1H), 4.89 (s, 1H), 4.19 (t,  $J$  = 6.8 Hz, 2H), 2.62 (t,  $J$  = 6.7 Hz, 2H), 2.26 (s, 3H), 1.86 (s, 3H).

**<sup>13</sup>C NMR** (101 MHz, CDCl<sub>3</sub>)  $\delta$  166.5, 160.6, 141.4, 139.5, 132.5, 128.5, 120.2, 119.0, 118.1, 116.9, 113.4, 106.0, 72.7, 38.4, 22.8, 10.1.

**HRMS (ESI)**  $m/z$ : [C<sub>16</sub>H<sub>16</sub>N<sub>2</sub>O<sub>2</sub>+H]<sup>+</sup> calcd.: 269.1285; found: 269.1287.

**3,7-dimethyl-4-((3-methylbut-3-en-1-yl)oxy)quinolin-2(1H)-one (5l):**

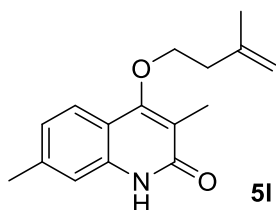

Chemical Formula: C<sub>16</sub>H<sub>19</sub>NO<sub>2</sub>  
Exact Mass: 257.1416

**5l**

Following the *general procedure 2*, compound **5l** was obtained as a colorless solid (231 mg, 45%) by column chromatography (silica, pentane/diethyl ether 1:1.5).

**TLC:**  $R_f$  = 0.47 (Pentane:EtOAc, 1:1) [UV].

**M.p.:** 168-170 °C.

**IR** (film)  $\nu_{max}/cm^{-1}$  2944, 2892, 2853, 1641, 1611, 1566, 1513, 1480, 1439, 1394, 1375, 1358, 1316, 1256, 1190, 1176, 1148, 1111, 1080, 1038, 999, 981, 901, 849, 815, 786, 767, 741, 702, 669.

**<sup>1</sup>H NMR** (400 MHz, CDCl<sub>3</sub>)  $\delta$  11.90 (*br s*, 1H), 7.67 (d,  $J$  = 8.2 Hz, 1H), 7.23 (s, 1H), 7.04 (d,  $J$  = 8.2 Hz, 1H), 4.90 (s, 1H), 4.86 (s, 1H), 4.14 (t,  $J$  = 6.9 Hz, 2H), 2.61 (t,  $J$  = 6.9 Hz, 2H), 2.46 (s, 3H), 2.25 (s, 3H), 1.84 (s, 3H).

**<sup>13</sup>C NMR** (101 MHz, CDCl<sub>3</sub>)  $\delta$  166.3, 162.1, 141.8, 140.9, 137.3, 124.2, 122.7, 117.2, 116.1, 115.6, 112.8, 72.3, 38.5, 22.9, 21.8, 10.3.

**GC-MS; EI** (70 eV):  $t_R$  = 17.04 Min. [STDHT];  $m/z$  (%) = 257 (14) [M<sup>+</sup>], 207 (12), 189 (100), 160 (11), 134 (13), 69 (20).

**HRMS (ESI)**  $m/z$ : [C<sub>16</sub>H<sub>19</sub>NO<sub>2</sub>+H]<sup>+</sup> calcd.: 258.1489; found: 258.1489.

**3-ethyl-4-((3-methylbut-3-en-1-yl)oxy)quinolin-2(1H)-one (5m):**

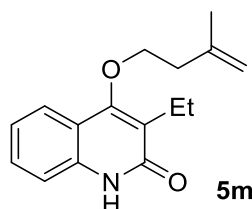

Chemical Formula: C<sub>16</sub>H<sub>19</sub>NO<sub>2</sub>  
Exact Mass: 257.1416

Following the *general procedure 2*, compound **5m** was obtained as a colorless solid (360 mg, 70%) by column chromatography (silica, pentane/diethyl ether 1:1.5).

**TLC:**  $R_f$  = 0.60 (Pentane:EtOAc, 1:1) [UV].

**M.p.:** 130-131 °C.

**IR** (film)  $\nu_{max}/cm^{-1}$  2957, 2930, 2868, 1651, 1612, 1571, 1499, 1433, 1396, 1374, 1355, 1321, 1259, 1144, 1106, 1065, 1049, 1031, 983, 959, 891, 864, 758, 687, 665.

**<sup>1</sup>H NMR** (500 MHz, CDCl<sub>3</sub>)  $\delta$  11.67 (*br s*, 1H), 7.76 (d,  $J$  = 7.5 Hz, 1H), 7.47 (td,  $J$  = 7.5, 1.0 Hz, 1H), 7.37 (d,  $J$  = 8.2 Hz, 1H), 7.21 (t,  $J$  = 7.5 Hz, 1H), 4.92 (s, 1H), 4.88 (s, 1H), 4.15 (t,  $J$  = 6.9 Hz, 2H), 2.76 (q,  $J$  = 7.4 Hz, 2H), 2.64 (t,  $J$  = 6.9 Hz, 2H), 1.86 (s, 3H), 1.27 (t,  $J$  = 7.4 Hz, 3H).

**<sup>13</sup>C NMR** (101 MHz, CDCl<sub>3</sub>)  $\delta$  165.9, 161.2, 141.8, 137.5, 130.0, 125.0, 123.0, 122.3, 117.7, 116.0, 112.8, 73.2, 38.5, 22.9, 18.2, 13.6.

**GC-MS; EI** (70 eV):  $t_R$  = 16.57 Min. [STDHT];  $m/z$  (%) = 257 (27) [M<sup>+</sup>], 212 (24), 189 (94), 188 (78), 174 (100), 161 (21), 69 (41).

**HRMS (ESI)**  $m/z$ : [C<sub>16</sub>H<sub>19</sub>NO<sub>2</sub>+H]<sup>+</sup> calcd.: 258.1489; found: 258.1489.

**7-fluoro-3-methyl-4-((3-methylbut-3-en-1-yl)oxy)quinolin-2(1H)-one (5n):**

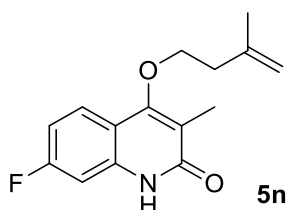

Chemical Formula: C<sub>15</sub>H<sub>16</sub>FNO<sub>2</sub>  
Exact Mass: 261.1165

Following the *general procedure 2*, compound **5n** was obtained as a colorless solid (365 mg, 70%) by column chromatography (silica, pentane/diethyl ether 1:1.5).

**TLC:**  $R_f$  = 0.67 (Pentane:EtOAc, 1:1.5) [UV].

**M.p.:** 138-139 °C.

**IR** (film)  $\nu_{max}/cm^{-1}$  3066, 2919, 2863, 1645, 1612, 1577, 1511, 1396, 1373, 1355, 1312, 1249, 1194, 1139, 1104, 1027, 895, 847, 811, 795, 761, 667.

**<sup>1</sup>H NMR** (400 MHz, CDCl<sub>3</sub>)  $\delta$  12.47 (*br s*, 1H), 7.77 (dd,  $J$  = 8.9, 5.9 Hz, 1H), 7.15 (dd,  $J$  = 9.4, 2.1 Hz, 1H), 6.94 (td,  $J$  = 8.7, 2.3 Hz, 1H), 4.92 (s, 1H), 4.87 (s, 1H), 4.15 (t,  $J$  = 6.9 Hz, 2H), 2.60 (t,  $J$  = 6.8 Hz, 2H), 2.23 (s, 3H), 1.84 (s, 3H).

**<sup>19</sup>F NMR** (376 MHz, CDCl<sub>3</sub>) δ -109.2.

**<sup>13</sup>C NMR** (101 MHz, CDCl<sub>3</sub>) δ 167.0, 163.8 (d, *J* = 249.5 Hz), 161.5, 141.7, 138.7 (d, *J* = 12.0 Hz), 125.1 (d, *J* = 10.1 Hz), 117.4, 114.5, 112.9, 110.9 (d, *J* = 23.3 Hz), 102.3 (d, *J* = 25.3 Hz), 72.4, 38.5, 22.9, 10.3.

**GC-MS; EI** (70 eV): *t*<sub>R</sub> = 16.17 Min. [STDHT]; *m/z* (%) = 261 (19) [M<sup>+</sup>], 246 (4), 216 (5), 193 (100), 164 (11), 138 (14), 69 (39).

**HRMS (ESI)** *m/z*: [C<sub>15</sub>H<sub>16</sub>FNO<sub>2</sub>+H]<sup>+</sup> calcd.: 262.1238; found: 262.1239.

**3-methyl-4-((3,4,4-trifluorobut-3-en-1-yl)oxy)quinolin-2(1H)-one (8):**

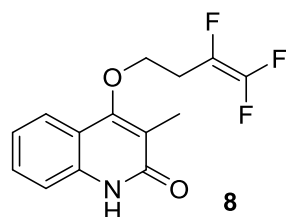

Chemical Formula: C<sub>14</sub>H<sub>12</sub>F<sub>3</sub>NO<sub>2</sub>  
Exact Mass: 283.0820

Following the *general procedure 2*, compound **8** was obtained as a colorless solid (390 mg, 69%) by column chromatography (silica, pentane/diethyl ether 1:2).

**TLC:** *R*<sub>f</sub> = 0.44 (Pentane:EtOAc, 1:1.5) [UV].

**M.p.:** 125-126 °C.

**IR** (film) *v*<sub>max</sub>/cm<sup>-1</sup> 3151, 3103, 3013, 2955, 2895, 1803, 1642, 1611, 1573, 1498, 1481, 1429, 1373, 1359, 1303, 1259, 1246, 1211, 1145, 1118, 1104, 1034, 1010, 991, 870, 850, 829, 783, 760, 694.

**<sup>1</sup>H NMR** (400 MHz, CDCl<sub>3</sub>) δ 12.24 (*br s*, 1H), 7.73 (d, *J* = 7.9 Hz, 1H), 7.55-7.43 (m, 2H), 7.24 (ddd, *J* = 8.2, 6.6, 1.6 Hz, 1H), 4.20 (t, *J* = 6.3 Hz, 2H), 2.90 (tdd, *J* = 6.4, 4.0, 2.7 Hz, 1H), 2.85 (tdd, *J* = 6.3, 4.0, 2.7 Hz, 1H), 2.25 (s, 3H).

**<sup>19</sup>F NMR** (376 MHz, CDCl<sub>3</sub>) δ -102.7 (dd, *J* = 84.4, 32.9 Hz), -122.9 (dd, *J* = 114.4, 84.4 Hz), -175.7 (dd, *J* = 114.4, 32.9 Hz).

**<sup>13</sup>C NMR** (101 MHz, CDCl<sub>3</sub>) δ 166.2, 161.1, 154.0 (ddd, *J* = 287.0, 274.2, 46.1 Hz), 137.2, 130.4, 126.1 (ddd, *J* = 234.5, 53.5, 17.0 Hz), 122.8, 122.4, 118.7, 117.4, 116.4, 68.4, 27.4 (dd, *J* = 21.9, 2.4 Hz), 10.1.

**GC-MS; EI** (70 eV): *t*<sub>R</sub> = 15.54 Min. [STDHT]; *m/z* (%) = 283 (7) [M<sup>+</sup>], 269 (15), 268 (100), 175 (23), 174 (29), 146 (11), 130 (18), 120 (15), 109 (7), 89 (16).

**HRMS (ESI)** *m/z*: [C<sub>14</sub>H<sub>12</sub>F<sub>3</sub>NO<sub>2</sub>+H]<sup>+</sup> calcd.: 284.0893; found: 284.0894.

**4-((4λ<sup>5</sup>-penta-3,4-dien-1-yl)oxy)-3-methylquinolin-2(1H)-one (10a):**

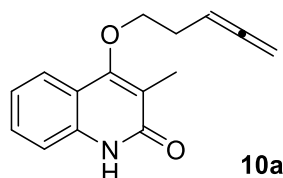

Chemical Formula: C<sub>15</sub>H<sub>15</sub>NO<sub>2</sub>  
Exact Mass: 241.1103

Following the *general procedure 2*, compound **10a** was obtained as a colorless solid (222 mg, 46%) by column chromatography (silica, pentane/diethyl ether 1:2).

**TLC:** *R*<sub>f</sub> = 0.22 (Pentane:EtOAc, 1:1) [UV].

**M.p.:** 104-105 °C.



**IR** (film)  $\nu_{\max}/\text{cm}^{-1}$  3162, 3110, 2955, 2886, 2859, 2751, 1952, 1730, 1655, 1615, 1572, 1499, 1434, 1376, 1361, 1318, 1269, 1145, 1104, 1012, 979, 862, 750, 695.

**$^1\text{H}$  NMR** (400 MHz,  $\text{CDCl}_3$ )  $\delta$  12.14 (*br s*, 1H), 7.81 (d,  $J = 7.8$  Hz, 1H), 7.48 (td,  $J = 7.6, 1.2$  Hz, 1H), 7.44 (d,  $J = 7.3$  Hz, 1H), 7.22 (td,  $J = 7.6, 1.2$  Hz, 1H), 5.28 (*virt. quint*,  $J \approx J = 6.8$  Hz, 1H), 4.75 (dt,  $J = 6.4, 3.2$  Hz, 2H), 4.12 (t,  $J = 6.6$  Hz, 2H), 2.60 (dt,  $J = 6.8, 6.6, 3.2$  Hz, 2H), 2.26 (s, 3H).

**$^{13}\text{C}$  NMR** (101 MHz,  $\text{CDCl}_3$ )  $\delta$  209.3, 166.4, 161.5, 137.3, 130.0, 122.8, 122.4, 118.7, 117.7, 116.1, 86.2, 75.8, 73.1, 29.5, 10.4.

**GC-MS; EI** (70 eV):  $t_{\text{R}} = 16.83$  Min. [STDHT];  $m/z$  (%) = 241 (15) [ $\text{M}^+$ ], 240 (22), 226 (100), 175 (95), 146 (23), 120 (27), 92 (16), 77 (12), 67 (30), 65 (25).

**HRMS (ESI)**  $m/z$ : [ $\text{C}_{15}\text{H}_{15}\text{NO}_2 + \text{H}$ ] $^+$  calcd.: 242.1176; found: 242.1179.

**3-methyl-4-((3-methyl-4 $\lambda^5$ -penta-3,4-dien-1-yl)oxy)quinolin-2(1H)-one (10b):**

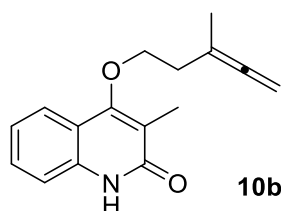

Chemical Formula:  $\text{C}_{16}\text{H}_{17}\text{NO}_2$

Exact Mass: 255.1259

Following the *general procedure 2*, compound **10b** was obtained as a colorless solid (260 mg, 51%) by column chromatography (silica, pentane/diethyl ether 1:2).

**TLC:**  $R_f = 0.16$  (Pentane:EtOAc, 2:1) [UV].

**M.p.:** 134-135 °C.

**IR** (film)  $\nu_{\max}/\text{cm}^{-1}$  3150, 3107, 3073, 3051, 2993, 2936, 2916, 2899, 2848, 1960, 1655, 1640, 1615, 1600, 1572, 1497, 1479, 1426, 1374, 1356, 1269, 1253, 1142, 1104, 1009, 975, 891, 874, 749, 694.

**$^1\text{H}$  NMR** (500 MHz,  $\text{CDCl}_3$ )  $\delta$  11.90 (*br s*, 1H), 7.81 (dd,  $J = 8.0, 1.0$  Hz, 1H), 7.48 (td,  $J = 7.5, 1.0$  Hz, 1H), 7.41 (d,  $J = 8.0$  Hz, 1H), 7.21 (td,  $J = 7.5, 1.0$  Hz, 1H), 4.66 (*virt. sext*,  $J \approx J = 3.1$  Hz, 2H), 4.15 (t,  $J = 6.5$  Hz, 2H), 2.53 (tt,  $J = 6.5, 3.1$  Hz, 2H), 2.26 (s, 3H), 1.80 (t,  $J = 3.1$  Hz, 3H).

**$^{13}\text{C}$  NMR** (101 MHz,  $\text{CDCl}_3$ )  $\delta$  206.4, 166.5, 161.6, 137.3, 130.0, 122.9, 122.3, 118.6, 117.8, 116.1, 94.9, 75.3, 72.1, 34.1, 19.3, 10.4.

**GC-MS; EI** (70 eV):  $t_{\text{R}} = 17.15$  Min. [STDHT];  $m/z$  (%) = 255 (1) [ $\text{M}^+$ ], 241 (17), 240 (100), 175 (42), 146 (9), 120 (10), 79 (26).

**HRMS (ESI)**  $m/z$ : [ $\text{C}_{16}\text{H}_{17}\text{NO}_2 + \text{H}$ ] $^+$  calcd.: 256.1332; found: 256.1333.

**6-chloro-3-methyl-4-((3-methyl-4 $\lambda^5$ -penta-3,4-dien-1-yl)oxy)quinolin-2(1H)-one (10c):**

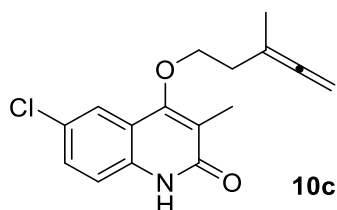

Chemical Formula:  $\text{C}_{16}\text{H}_{16}\text{ClNO}_2$

Exact Mass: 289.0870

Following the *general procedure 2*, compound **10c** was obtained as a colorless solid (186 mg, 32%) by column chromatography (silica, pentane/diethyl ether 1:2).

**TLC:**  $R_f$  = 0.38 (Pentane:EtOAc, 1:1) [UV].

**M.p.:** 126-127 °C.

**IR** (film)  $\nu_{\max}/\text{cm}^{-1}$  3147, 3050, 2984, 2939, 2913, 2890, 2852, 1960, 1661, 1608, 1486, 1414, 1373, 1351, 1305, 1255, 1148, 1119, 973, 881, 816, 699.

**$^1\text{H}$  NMR** (500 MHz,  $\text{CDCl}_3$ )  $\delta$  12.28 (*br s*, 1H), 7.80 (d,  $J$  = 2.2 Hz, 1H), 7.42 (dd,  $J$  = 8.7, 2.3 Hz, 1H), 7.36 (d,  $J$  = 8.7 Hz, 1H), 4.70 (*virt. sext*,  $J \approx J$  = 3.2 Hz, 2H), 4.16 (t,  $J$  = 6.7 Hz, 2H), 2.52 (tt,  $J$  = 6.5, 3.1 Hz, 2H), 2.25 (s, 3H), 1.81 (t,  $J$  = 3.2 Hz, 3H).

**$^{13}\text{C}$  NMR** (101 MHz,  $\text{CDCl}_3$ )  $\delta$  206.4, 166.3, 160.7, 135.7, 130.3, 127.9, 122.5, 119.5, 119.0, 117.5, 94.9, 75.5, 72.1, 34.2, 19.3, 10.6.

**GC-MS; EI** (70 eV):  $t_R$  = 16.18 Min. [STDHT];  $m/z$  (%) = 289 (1) [ $\text{M}^+$ ], 276 (33), 275 (16), 274 (100), 209 (14), 79 (11).

**HRMS (ESI)**  $m/z$ : [ $\text{C}_{16}\text{H}_{16}\text{ClNO}_2 + \text{H}$ ] $^+$  calcd.: 290.0942; found: 290.0944.

**3-ethyl-4-((3-methyl-4 $\lambda^5$ -penta-3,4-dien-1-yl)oxy)quinolin-2(1H)-one (10d):**

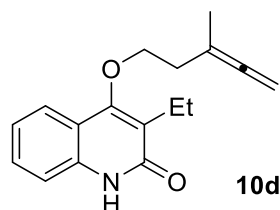

Chemical Formula:  $\text{C}_{17}\text{H}_{19}\text{NO}_2$   
Exact Mass: 269.1416

Following the *general procedure 2*, compound **10d** was obtained as a colorless solid (215 mg, 40%) by column chromatography (silica, pentane/diethyl ether 1:1.5).

**TLC:**  $R_f$  = 0.48 (Pentane:EtOAc, 1:1) [UV].

**M.p.:** 113-114 °C.

**IR** (film)  $\nu_{\max}/\text{cm}^{-1}$  3110, 3009, 2979, 2963, 2930, 2887, 2851, 1960, 1655, 1613, 1571, 1499, 1428, 1358, 1266, 1141, 1104, 1043, 993, 873, 854, 747, 680.

**$^1\text{H}$  NMR** (500 MHz,  $\text{CDCl}_3$ )  $\delta$  10.85 (*br s*, 1H), 7.79 (d,  $J$  = 7.3 Hz, 1H), 7.46 (td,  $J$  = 7.6, 1.0 Hz, 1H), 7.29 (d,  $J$  = 8.0 Hz, 1H), 7.21 (t,  $J$  = 7.6 Hz, 1H), 4.67 (*virt. sext*,  $J \approx J$  = 3.1 Hz, 2H), 4.14 (t,  $J$  = 7.0 Hz, 2H), 2.75 (q,  $J$  = 7.4 Hz, 2H), 2.55 (tt,  $J$  = 7.0, 3.1 Hz, 2H), 1.81 (t,  $J$  = 3.1 Hz, 3H), 1.25 (t,  $J$  = 7.5 Hz, 3H).

**$^{13}\text{C}$  NMR** (101 MHz,  $\text{CDCl}_3$ )  $\delta$  206.4, 166.0, 161.2, 137.5, 130.0, 124.9, 123.0, 122.2, 117.8, 116.0, 95.0, 75.3, 72.9, 34.2, 19.3, 18.2, 13.6.

**GC-MS; EI** (70 eV):  $t_R$  = 17.22 Min. [STDHT];  $m/z$  (%) = 269 (1) [ $\text{M}^+$ ], 241 (17), 240 (100), 189 (19), 188 (22), 174 (39), 79 (22).

**HRMS (ESI)**  $m/z$ : [ $\text{C}_{17}\text{H}_{19}\text{NO}_2 + \text{H}$ ] $^+$  calcd.: 270.1489; found: 270.1489.

**4-((3 $\lambda^5$ -buta-2,3-dien-1-yl)oxy)-6-chloro-3-methylquinolin-2(1H)-one (12a):**

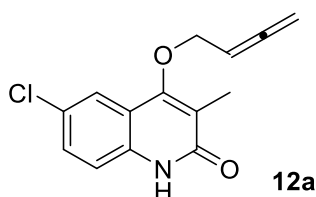

Chemical Formula:  $\text{C}_{14}\text{H}_{12}\text{ClNO}_2$   
Exact Mass: 261.0557

Following the *general procedure 2*, compound **12a** was obtained as a colorless solid (251 mg, 48%) by column chromatography (silica, pentane/diethyl ether 1:2).

**TLC:**  $R_f$  = 0.14 (Pentane:EtOAc, 2:1) [UV].

**M.p.:** 174-176 °C.

**IR** (film)  $\nu_{\max}/\text{cm}^{-1}$  3156, 2995, 2882, 2828, 2744, 1955, 1665, 1609, 1486, 1412, 1351, 1305, 1263, 1143, 1114, 954, 940, 880, 843, 814, 769, 702.

**$^1\text{H}$  NMR** (500 MHz,  $\text{CDCl}_3$ )  $\delta$  12.35 (*br s*, 1H), 7.78 (d,  $J$  = 2.0 Hz, 1H), 7.43 (dd,  $J$  = 8.7, 2.0 Hz, 1H), 7.37 (d,  $J$  = 8.7 Hz, 1H), 5.48 (*virt. quint*,  $J \approx J$  = 7.0 Hz, 1H), 4.90 (dt,  $J$  = 7.0, 2.0 Hz, 2H), 4.60 (dt,  $J$  = 7.0, 2.0 Hz, 2H), 2.26 (s, 3H).

**$^{13}\text{C}$  NMR** (101 MHz,  $\text{CDCl}_3$ )  $\delta$  210.1, 166.2, 160.1, 135.7, 130.3, 128.0, 122.5, 120.2, 118.9, 117.6, 87.0, 77.0, 71.8, 10.7.

**GC-MS; EI** (70 eV):  $t_R$  = 15.77 Min. [STDHT];  $m/z$  (%) = 263 (2) [ $\text{M}+2$ ], 261 (6) [ $\text{M}+$ ], 248 (34), 246 (100), 232 (20), 218 (10), 204 (6), 180 (7), 153 (11), 126 (10), 79 (20).

**HRMS (ESI)**  $m/z$ : [ $\text{C}_{14}\text{H}_{12}\text{ClNO}_2+\text{H}$ ] $^+$  calcd.: 262.0629; found: 262.0630.

**4-((3 $\lambda^5$ -buta-2,3-dien-1-yl)oxy)-3-methylquinolin-2(1H)-one (12b):**

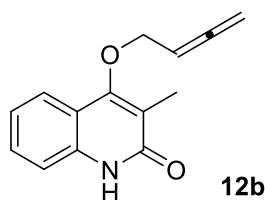

Chemical Formula:  $\text{C}_{14}\text{H}_{13}\text{NO}_2$   
Exact Mass: 227.0946

Following the *general procedure 2*, compound **12b** was obtained as a colorless solid (205 mg, 45%) by column chromatography (silica, pentane/diethyl ether 1:2).

**TLC:**  $R_f$  = 0.40 (Pentane:EtOAc, 1:1) [UV].

**M.p.:** 145-146 °C.

**IR** (film)  $\nu_{\max}/\text{cm}^{-1}$  3162, 3107, 3057, 3006, 2980, 2953, 2923, 2880, 2856, 1961, 1659, 1615, 1573, 1499, 1434, 1351, 1311, 1267, 1137, 1098, 1007, 969, 941, 876, 864, 856, 845, 748, 737, 697, 687, 666.

**$^1\text{H}$  NMR** (500 MHz,  $\text{CDCl}_3$ )  $\delta$  11.84 (*br s*, 1H), 7.81 (dd,  $J$  = 8.0, 0.9 Hz, 1H), 7.48 (ddd,  $J$  = 8.0, 7.0, 1.0 Hz, 1H), 7.41 (d,  $J$  = 8.1 Hz, 1H), 7.22 (ddd,  $J$  = 8.0, 7.0, 1.0 Hz, 1H), 5.49 (*virt. quint*,  $J \approx J$  = 6.9 Hz, 1H), 4.87 (dt,  $J$  = 6.6, 2.3 Hz, 2H), 4.61 (dt,  $J$  = 7.1, 2.3 Hz, 2H), 2.27 (s, 3H).

**$^{13}\text{C}$  NMR** (101 MHz,  $\text{CDCl}_3$ )  $\delta$  210.0, 166.2, 161.0, 137.2, 130.1, 123.0, 122.4, 119.2, 117.7, 116.0, 87.1, 76.8, 71.7, 10.6.

**GC-MS; EI** (70 eV):  $t_R$  = 14.60 Min. [STDHT];  $m/z$  (%) = 227 (5) [ $\text{M}+$ ], 226 (13), 212 (100), 198 (24), 184 (12), 170 (10), 119 (11), 92 (16), 79 (14).

**HRMS (ESI)**  $m/z$ : [ $\text{C}_{14}\text{H}_{13}\text{NO}_2+\text{H}$ ] $^+$  calcd.: 228.1019; found: 228.1020.

**3-methyl-4-((4-methyl-3 $\lambda^5$ -penta-2,3-dien-1-yl)oxy)quinolin-2(1H)-one (15):**

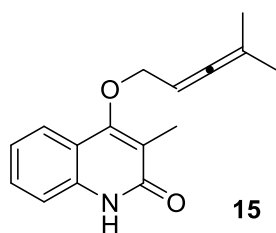

Chemical Formula: C<sub>16</sub>H<sub>17</sub>NO<sub>2</sub>  
Exact Mass: 255.1259

**15**

Following the *general procedure 2*, compound **15** was obtained as a colorless solid (220 mg, 43%) by column chromatography (silica, pentane/diethyl ether 1:1.5).

**TLC:** R<sub>f</sub> = 0.47 (Pentane:EtOAc, 1:1) [UV].

**M.p.:** 110-111 °C.

**IR** (film)  $\nu_{\text{max}}/\text{cm}^{-1}$  3109, 3073, 2946, 2855, 1971, 1653, 1614, 1573, 1436, 1360, 1269, 1185, 1138, 1098, 986, 967, 881, 750, 736, 690, 666.

**<sup>1</sup>H NMR** (400 MHz, CDCl<sub>3</sub>)  $\delta$  12.07 (*br s*, 1H), 7.83 (d, *J* = 7.9 Hz, 1H), 7.48 (td, *J* = 7.6, 1.2 Hz, 1H), 7.42 (d, *J* = 7.4 Hz, 1H), 7.21 (td, *J* = 7.6, 1.2 Hz, 1H), 5.35-5.26 (m, 1H), 4.56 (d, *J* = 7.1 Hz, 2H), 2.27 (s, 3H), 1.64 (s, 3H), 1.64 (s, 3H).

**<sup>13</sup>C NMR** (101 MHz, CDCl<sub>3</sub>)  $\delta$  204.0, 166.4, 161.3, 137.2, 130.0, 123.3, 122.3, 119.1, 118.0, 116.0, 97.2, 85.5, 73.0, 20.3, 10.6.

**GC-MS; EI** (70 eV): *t*<sub>R</sub> = 15.56 Min. [STDHT]; *m/z* (%) = 255 (1) [M<sup>+</sup>], 240 (100), 227 (10), 212 (11), 198 (7), 120 (15), 93 (14), 91 (14), 77 (9).

**HRMS (ESI)** *m/z*: [C<sub>16</sub>H<sub>17</sub>NO<sub>2</sub>+H]<sup>+</sup> calcd.: 256.1332; found: 256.1333.

#### *General Procedure 4: Non-catalyzed [2+2] Photocycloaddition*

The corresponding quinolone (*c* = 10.0 mmol/L) was dissolved in 10 mL of acetonitrile and irradiated at  $\lambda$  = 300 nm at room temperature until full conversion was achieved. The solvent was removed under reduced pressure. The crude product was purified by flash column chromatography.

#### *General Procedure 5: TXT-Catalyzed [2+2] Photocycloaddition*

The corresponding quinolone (*c* = 10.0 mmol/L, 1.0 eq.) and thioxanthenone (TXT) (4.2 mg, 20 mol%) were dissolved in 10 mL of acetonitrile and irradiated at  $\lambda$  = 420 nm at room temperature until full conversion. The solvent was evaporated *in vacuo*. The crude product was purified by flash column chromatography.

#### *General Procedure 6: (+)-TXT-Catalyzed [2+2] Photocycloaddition*

The corresponding quinolone (*c* = 2.50 mmol/L, 1.0 eq.) and enantiomerically (+)-TXT **6** (1.1 mg, 10 mol%) were dissolved in 10 mL of  $\alpha,\alpha,\alpha$ -trifluorotoluene, cooled to -25 °C and irradiated at  $\lambda$  = 420 nm until full conversion. The solvent was evaporated *in vacuo*. The crude product was purified by flash column chromatography.

**(3a*S*,4a*R*,10b*S*)-4a-methyl-3,3a,4,4a-tetrahydro-2*H*-furo[2',3':2,3]cyclobuta[1,2-*c*]quinolin-5(6*H*)-one (7b):**

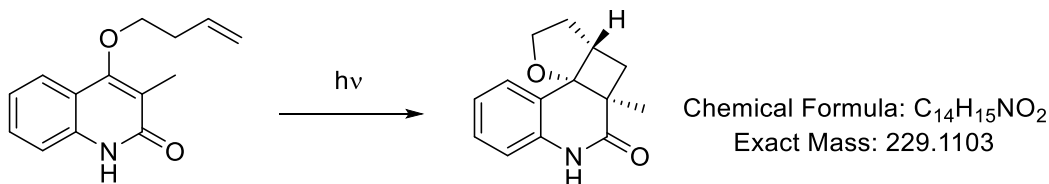

#### Non-catalyzed [2+2] Photocycloaddition

4-(but-3-en-1-yloxy)-3-methylquinolin-2(1*H*)-one (**5b**) (22.9 mg, 0.1 mmol) was dissolved in acetonitrile (10 mL, *c* = 10 mmol/L) and reacted for 1 h, as described in *General Procedure 4*. Following flash column chromatography (silica, pentane/ethyl acetate 2:1), the racemic compound *rac*-**7b** was obtained as a colorless solid (22.7 mg, 99 μmol, 99%).

#### TXT-Catalyzed [2+2] Photocycloaddition

4-(but-3-en-1-yloxy)-3-methylquinolin-2(1*H*)-one (**5b**) (22.9 mg, 0.1 mmol, 1.0 eq.) and thioxanthenone (TXT) (4.2 mg, 20 mol%) were dissolved in acetonitrile (10 mL, *c* = 10 mmol/L) and reacted for 1 h, as described in *General Procedure 5*. Following flash column chromatography (silica, pentane/ethyl acetate 2:1), the racemic compound *rac*-**7b** was obtained as a colorless solid (22.7 mg, 99 μmol, 99%).

#### Enantioselective [2+2] Photocycloaddition

4-(but-3-en-1-yloxy)-3-methylquinolin-2(1*H*)-one (**5b**) (5.8 mg, 25 μmol, 1.0 eq.) and **6** (1.1 mg, 2.5 μmol, 10 mol%) were dissolved in α,α,α-trifluorotoluene (10 mL, *c* = 2.5 mmol/L) and reacted for 1 h at -25 °C, as described in *General Procedure 6*. Following flash column chromatography (silica, pentane/ethyl acetate 2:1), the title compound **7b** was obtained as a colorless solid (5.6 mg, 24.4 μmol, 97%, 88% *ee*).

**TLC:** *R*<sub>f</sub> = 0.60 (Pentane:EtOAc, 1:1) [UV].

**M.p.:** 221–224 °C.

**IR** (film)  $\nu_{\text{max}}/\text{cm}^{-1}$  3187, 3057, 2978, 2926, 1666, 1594, 1491, 1484, 1376, 1362, 1254, 1063, 1026, 936, 881, 859, 764, 684.

**<sup>1</sup>H NMR** (400 MHz, CDCl<sub>3</sub>)  $\delta$  9.39 (*br s*, 1H), 7.28 (*dd*, *J* = 7.6, 1.6 Hz, 1H), 7.18 (*td*, *J* = 7.6, 1.5 Hz, 1H), 7.01 (*td*, *J* = 7.5, 1.2 Hz, 1H), 6.81 (*dd*, *J* = 7.9, 1.2 Hz, 1H), 4.54 (*t*, *J* = 8.1 Hz, 1H), 4.22 (*ddd*, *J* = 11.1, 8.7, 5.6 Hz, 1H), 2.99 (*virt. q*, *J* ≈ *J* = 7.6 Hz, 1H), 2.73 (*dd*, *J* = 12.8, 9.1 Hz, 1H), 1.96 (*dddd*, *J* = 12.6, 11.2, 8.2, 6.6 Hz, 1H), 1.85 (*dd*, *J* = 12.8, 7.9 Hz, 1H), 1.76 (*dd*, *J* = 12.6, 5.5 Hz, 1H), 1.39 (*s*, 3H).

**<sup>13</sup>C NMR** (101 MHz, CDCl<sub>3</sub>)  $\delta$  177.3, 135.5, 129.0, 125.7, 124.9, 123.7, 115.3, 86.8, 70.5, 46.7, 43.8, 35.9, 30.5, 18.0.

**GC-MS; EI** (70 eV): *t*<sub>R</sub> = 14.85 Min. [STDHT]; *m/z* (%) = 229 (26) [M<sup>+</sup>], 214 (45), 175 (100), 146 (17), 130 (11), 120 (13), 55 (25).

**HRMS (ESI)** *m/z*: [C<sub>14</sub>H<sub>15</sub>NO<sub>2</sub>+H]<sup>+</sup> calcd.: 230.1176; found: 230.1177.

**Optical Rotation:** [ $\alpha$ ]<sub>D</sub><sup>26</sup>: −60.0 (*c* = 2.0, CHCl<sub>3</sub>) [88% *ee*].

**Chiral HPLC:** 88% *ee* [Daicel Chiralpak AD-H, 250×4.6, *i*-PrOH/*n*-heptane = 10/90, 1 mL/min, 210 nm, *t*<sub>R</sub> = 12.77 min (minor), 13.60 min (major)].

**(3*aS*,4*aR*,10*bS*)-3*a*,4*a*-dimethyl-3,3*a*,4,4*a*-tetrahydro-2*H*-furo[2',3':2,3]cyclobuta[1,2-*c*]quinolin-5(6*H*)-one (**7c**):**

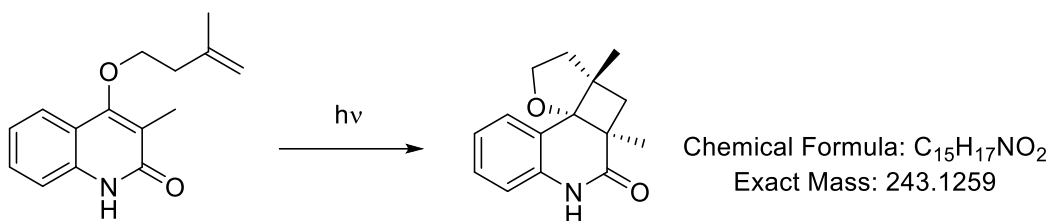

#### Non-catalyzed [2+2] Photocycloaddition

3-methyl-4-((3-methylbut-3-en-1-yl)oxy)quinolin-2(1*H*)-one (**5c**) (24.3 mg, 0.1 mmol) was dissolved in acetonitrile (10 mL, *c* = 10 mmol/L) and reacted for 1 h, as described in *general procedure 4*. Following flash column chromatography (silica, pentane/ethyl acetate 2:1), the racemic compound *rac*-**7c** was obtained as a colorless solid (23.5 mg, 97 μmol, 97%).

#### TXT-Catalyzed [2+2] Photocycloaddition

3-methyl-4-((3-methylbut-3-en-1-yl)oxy)quinolin-2(1*H*)-one (**5c**) (24.3 mg, 0.1 mmol, 1.0 eq.) and thioxanthenone (TXT) (4.2 mg, 20 mol%) were dissolved in acetonitrile (10 mL, *c* = 10 mmol/L) and reacted for 1 h, as described in *general procedure 5*. Following flash column chromatography (silica, pentane/ethyl acetate 2:1), the racemic compound *rac*-**7c** was obtained as a colorless solid (24.3 mg, 100 μmol, >99%).

#### Enantioselective [2+2] Photocycloaddition

3-methyl-4-((3-methylbut-3-en-1-yl)oxy)quinolin-2(1*H*)-one (**5c**) (6.1 mg, 25 μmol, 1.0 eq.) and **6** (1.1 mg, 2.5 μmol, 10 mol%) were dissolved in α,α,α-trifluorotoluene (10 mL, *c* = 2.5 mmol/L) and reacted for 1 h at -25 °C, as described in *general procedure 6*. Following flash column chromatography (silica, pentane/ethyl acetate 2:1), the title compound **7c** was obtained as a colorless solid (6.1 mg, 25 μmol, >99%, 99% *ee*).

**TLC:** *R*<sub>f</sub> = 0.60 (Pentane:EtOAc, 1:1) [UV].

**M.p.:** 164-165 °C.

**IR** (film)  $\nu_{\text{max}}/\text{cm}^{-1}$  3179, 3059, 2953, 2923, 2871, 1662, 1596, 1490, 1440, 1377, 1254, 1060, 1017, 893, 873, 859, 757, 733, 685, 660.

**<sup>1</sup>H NMR** (400 MHz, CDCl<sub>3</sub>)  $\delta$  9.11 (*br s*, 1H), 7.24 (*dd*, *J* = 7.6, 1.4 Hz, 1H), 7.18 (*td*, *J* = 7.6, 1.5 Hz, 1H), 7.02 (*td*, *J* = 7.5, 1.1 Hz, 1H), 6.79 (*dd*, *J* = 7.9, 0.7 Hz, 1H), 4.43 (*ddd*, *J* = 9.0, 8.0, 1.1 Hz, 1H), 4.13 (*ddd*, *J* = 11.2, 9.0, 5.6 Hz, 1H), 2.41 (*d*, *J* = 12.8 Hz, 1H), 2.06 (*d*, *J* = 12.8 Hz, 1H), 1.77 (*dd*, *J* = 12.3, 5.1 Hz, 1H), 1.69 (*td*, *J* = 11.8, 8.0 Hz, 1H), 1.40 (*s*, 3H), 0.98 (*s*, 3H).

**<sup>13</sup>C NMR** (101 MHz, CDCl<sub>3</sub>)  $\delta$  177.5, 136.1, 129.1, 126.8, 123.7, 122.4, 115.2, 88.0, 69.3, 48.7, 44.6, 42.5, 38.6, 21.6, 18.2.

**GC-MS; EI** (70 eV): *t*<sub>R</sub> = 14.74 Min. [STDHT]; *m/z* (%) = 243 (33) [*M*<sup>+</sup>], 228 (7), 198 (10), 175 (100), 146 (13), 120 (10), 69 (22).

**HRMS (ESI)** *m/z*: [C<sub>15</sub>H<sub>17</sub>NO<sub>2</sub>+H]<sup>+</sup>calcd.: 244.1332; found: 244.1333.

**Optical Rotation:** [ $\alpha$ ]<sub>D</sub><sup>26</sup>: -57.0 (*c* = 2.0, CHCl<sub>3</sub>) [99% *ee*].

**Chiral HPLC:** 99% *ee* [Daicel Chiralpak OD-H, 250×4.6, *i*-PrOH/*n*-heptane = 10/90, 1 mL/min, 210 nm, *t*<sub>R</sub> = 12.13 min (major), 14.74 min (minor)].

**(3*aR*,4*aR*,10*bS*)-4,4,4a-trimethyl-3,3*a*,4,4*a*-tetrahydro-2*H*-furo[2',3':2,3]cyclobuta[1,2-*c*]quinolin-5(6*H*)-one (7d):**

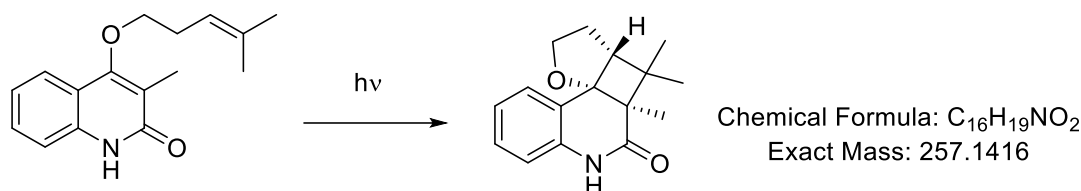

#### *Non-catalyzed [2+2] Photocycloaddition*

3-methyl-4-((4-methylpent-3-en-1-yl)oxy)quinolin-2(1*H*)-one (**5d**) (25.7 mg, 0.1 mmol, 1.0 eq.) was dissolved in acetonitrile (10 mL, *c* = 10 mmol/L) and reacted for 1 h, as described in *general procedure 4*. Following flash column chromatography (silica, pentane/ethyl acetate 2:1), the racemic compound *rac*-**7d** was obtained as a colorless solid (23.9 mg, 93 μmol, 93%).

#### *TXT-Catalyzed [2+2] Photocycloaddition*

3-methyl-4-((4-methylpent-3-en-1-yl)oxy)quinolin-2(1*H*)-one (**5d**) (25.7 mg, 0.1 mmol, 1.0 eq.) and thioxanthenone (TXT) (4.2 mg, 20 mol%) were dissolved in acetonitrile (10 mL, *c* = 10 mmol/L) and reacted for 1 h, as described in *general procedure 5*. Following flash column chromatography (silica, pentane/ethyl acetate 2:1), the racemic compound *rac*-**7d** was obtained as a colorless solid (24.1 mg, 94 μmol, 94%).

#### *Enantioselective [2+2] Photocycloaddition*

3-methyl-4-((4-methylpent-3-en-1-yl)oxy)quinolin-2(1*H*)-one (**5d**) (6.4 mg, 25 μmol, 1.0 eq.) and **6** (1.1 mg, 2.5 μmol, 10 mol%) were dissolved in α,α,α-trifluorotoluene (10 mL, *c* = 2.5 mmol/L) and reacted for 1 h at -25 °C, as described in *general procedure 6*. Following flash column chromatography (silica, pentane/ethyl acetate 2:1), the title compound **7d** was obtained as a colorless solid (6.3 mg, 24.5 μmol, 98%, 96% *ee*).

**TLC:** R<sub>f</sub> = 0.72 (Pentane:EtOAc, 1:2) [UV].

**M.p.:** 176-178 °C.

**IR** (film) ν<sub>max</sub>/cm<sup>-1</sup> 3188, 3058, 2967, 2932, 2880, 1663, 1596, 1490, 1372, 1253, 1057, 991, 856, 758.

**<sup>1</sup>H NMR** (500 MHz, CDCl<sub>3</sub>) δ 7.94 (*br s*, 1H), 7.23 (*d*, *J* = 7.7 Hz, 1H), 7.18 (*t*, *J* = 7.6 Hz, 1H), 7.02 (*t*, *J* = 7.5 Hz, 1H), 6.67 (*d*, *J* = 7.9 Hz, 1H), 4.46 (*td*, *J* = 8.3, 5.3 Hz, 1H), 4.26 (*virt. q*, *J* ≈ *J* = 8.4 Hz, 1H), 2.58 (*dd*, *J* = 7.2, 4.0 Hz, 1H), 2.10 (*q*, *J* = 7.9 Hz, 2H), 1.34 (*s*, 3H), 1.21 (*s*, 3H), 1.08 (*s*, 3H).

**<sup>13</sup>C NMR** (75 MHz, CDCl<sub>3</sub>) δ 173.9, 135.2, 128.8, 126.3, 126.0, 123.7, 115.2, 84.1, 73.0, 58.5, 51.9, 38.7, 29.2, 27.4, 19.4, 14.6.

**GC-MS; EI** (70 eV): *t*<sub>R</sub> = 15.79 Min. [STDHT]; *m/z* (%) = 257 (5) [M<sup>+</sup>], 242 (100), 175 (45), 97 (35), 83 (46), 55 (40).

**HRMS (ESI)** *m/z*: [C<sub>16</sub>H<sub>19</sub>NO<sub>2</sub>+H]<sup>+</sup>+calcd.: 258.1489; found: 258.1489.

**Optical Rotation:** [α]<sub>D</sub><sup>26</sup>: +102.0 (*c* = 2.0, CHCl<sub>3</sub>) [96% *ee*].

**Chiral HPLC:** 96% *ee* [Daicel Chiralpak AD-H, 250×4.6, *i*-PrOH/*n*-heptane = 10/90, 1 mL/min, 210 nm, *t*<sub>R</sub> = 9.50 min (minor), 11.63 min (major)].

**(6*aR*,6*bR*,9*aR*,12*aS*)-6a-methyl-6*b*,7,8,9,10,11-hexahydro-5*H*-cyclopenta[3,4]furo[2',3':2,3]cyclobuta-[1,2-*c*]quinolin-6(6*aH*)-one (7e):**

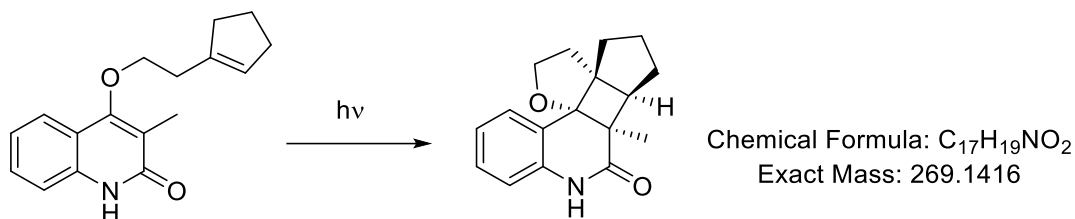

#### *TXT-Catalyzed [2+2] Photocycloaddition*

4-(2-(cyclopent-1-en-1-yl)ethoxy)-3-methylquinolin-2(1*H*)-one (**5e**) (26.9 mg, 0.1 mmol, 1.0 eq.) and thioxanthenone (TXT) (4.2 mg, 20 mol%) were dissolved in acetonitrile (10 mL, *c* = 10 mmol/L) and reacted for 1 h, as described in *general procedure 5*. Following flash column chromatography (silica, pentane/ethyl acetate 4:1), the racemic compound *rac*-**7e** was obtained as a colorless solid (26.9 mg, 100 μmol, >99%).

#### *Enantioselective [2+2] Photocycloaddition*

4-(2-(cyclopent-1-en-1-yl)ethoxy)-3-methylquinolin-2(1*H*)-one (**5e**) (6.7 mg, 25 μmol, 1.0 eq.) and **6** (1.1 mg, 2.5 μmol, 10 mol%) were dissolved in α,α,α-trifluorotoluene (10 mL, *c* = 2.5 mmol/L) and reacted for 1 h at -25 °C, as described in *general procedure 6*. Following flash column chromatography (silica, pentane/ethyl acetate 4:1), the title compound **7e** was obtained as a colorless solid (6.7 mg, 25 μmol, >99%, 98% *ee*).

**TLC:** *R*<sub>f</sub> = 0.40 (Pentane:EtOAc, 2:1) [UV].

**M.p.:** 193-195 °C.

**IR** (film)  $\nu_{\text{max}}$ /cm<sup>-1</sup> 3186, 3052, 2982, 2922, 2862, 1666, 1597, 1494, 1433, 1375, 1249, 1164, 1046, 999, 908, 873, 856, 752, 730, 692, 669.

**<sup>1</sup>H NMR** (500 MHz, CDCl<sub>3</sub>)  $\delta$  9.08 (*br s*, 1H), 7.19 (*d*, *J* = 7.2 Hz, 1H), 7.16 (*dd*, *J* = 7.7, 1.4 Hz, 1H), 7.02 (*td*, *J* = 7.5, 0.8 Hz, 1H), 6.75 (*d*, *J* = 7.8 Hz, 1H), 4.41 (*t*, *J* = 8.5 Hz, 1H), 4.12 (*ddd*, *J* = 11.5, 9.0, 5.6 Hz, 1H), 2.36 (*d*, *J* = 7.2 Hz, 1H), 2.12 (*dd*, *J* = 12.9, 4.7 Hz, 1H), 2.03 (*td*, *J* = 12.1, 8.4 Hz, 1H), 1.87 (*dd*, *J* = 12.7, 5.4 Hz, 1H), 1.59 (*ddd*, *J* = 15.8, 11.1, 6.0 Hz, 2H), 1.51-1.42 (*m*, 5H), 1.30-1.23 (*m*, 1H).

**<sup>13</sup>C NMR** (101 MHz, CDCl<sub>3</sub>)  $\delta$  174.7, 136.1, 129.1, 128.0, 123.5, 121.7, 115.2, 86.0, 69.6, 61.8, 53.2, 47.3, 36.5, 32.3, 29.6, 26.4, 20.0.

**GC-MS; EI** (70 eV): *t*<sub>R</sub> = 16.34 Min. [STDHT]; *m/z* (%) = 269 (17) [M<sup>+</sup>], 177 (12), 176 (100), 175 (41), 146 (7), 130 (7), 120 (7), 95 (36), 79 (10), 67 (14).

**HRMS (ESI)** *m/z*: [C<sub>17</sub>H<sub>19</sub>NO<sub>2</sub>+H]<sup>+</sup> calcd.: 270.1489; found: 270.1490.

**Optical Rotation:** [ $\alpha$ ]<sub>D</sub><sup>26</sup>: -15.0 (*c* = 2.0, CHCl<sub>3</sub>) [98% *ee*].

**Chiral HPLC:** 98% *ee* [Daicel Chiralpak AD-H, 250×4.6, *i*-PrOH/*n*-heptane = 10/90, 1 mL/min, 210 nm, *t*<sub>R</sub> = 9.64 min (major), 10.60 min (minor)].

**(6a*R*,6b*R*,10a*R*,13a*S*)-6a-methyl-6a,6b,7,8,9,10,11,12-octahydrobenzo[3,4]furo[2',3':2,3]cyclobuta-[1,2-*c*]quinolin-6(5*H*)-one (7f):**



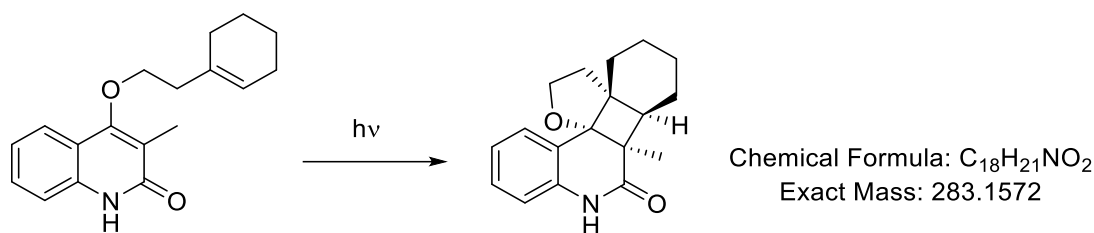

#### TXT-Catalyzed [2+2] Photocycloaddition

4-(2-(cyclohex-1-en-1-yl)ethoxy)-3-methylquinolin-2(1H)-one (**5f**) (28.3 mg, 0.1 mmol, 1.0 eq.) and thioxanthenone (TXT) (4.2 mg, 20 mol%) were dissolved in acetonitrile (10 mL,  $c = 10$  mmol/L) and reacted for 1 h, as described in *general procedure 5*. Following flash column chromatography (silica, pentane/ethyl acetate 4:1), the racemic compound *rac*-**7f** was obtained as a colorless solid (25.5 mg, 90  $\mu$ mol, 90%).

#### Enantioselective [2+2] Photocycloaddition

4-(2-(cyclohex-1-en-1-yl)ethoxy)-3-methylquinolin-2(1H)-one (**5f**) (7.1 mg, 25  $\mu$ mol, 1.0 eq.) and **6** (1.1 mg, 2.5  $\mu$ mol, 10 mol%) were dissolved in  $\alpha,\alpha,\alpha$ -trifluorotoluene (10 mL,  $c = 2.5$  mmol/L) and reacted for 1 h at  $-25$   $^{\circ}C$ , as described in *general procedure 6*. Following flash column chromatography (silica, pentane/ethyl acetate 4:1), the title compound **7f** was obtained as a colorless solid (6.6 mg, 23.3  $\mu$ mol, 93%, 96% *ee*).

**TLC:**  $R_f = 0.68$  (Pentane:EtOAc, 1:1) [UV].

**M.p.:** 164-165  $^{\circ}C$ .

**IR** (film)  $\nu_{max}/cm^{-1}$  3186, 3060, 2940, 2866, 1660, 1595, 1489, 1436, 1348, 1222, 1119, 1064, 1046, 993, 940, 871, 852, 785, 758, 735, 694, 678, 664.

**$^1H$  NMR** (500 MHz,  $CDCl_3$ )  $\delta$  8.35 (*br s*, 1H), 7.25 (*d*,  $J = 7.7$  Hz, 1H), 7.18 (*t*,  $J = 7.6$  Hz, 1H), 7.01 (*t*,  $J = 7.5$  Hz, 1H), 6.73 (*d*,  $J = 7.9$  Hz, 1H), 4.50 (*t*,  $J = 8.6$  Hz, 1H), 4.20 (*ddd*,  $J = 11.1, 9.1, 5.8$  Hz, 1H), 2.20 (*dd*,  $J = 7.6, 5.8$  Hz, 1H), 2.01 (*dd*,  $J = 12.4, 5.6$  Hz, 1H), 1.91 (*dt*,  $J = 19.7, 5.6$  Hz, 1H), 1.63-1.50 (*m*, 3H), 1.41-1.34 (*m*, 6H), 1.15 (*ddd*,  $J = 18.0, 10.6, 4.3$  Hz, 1H), 1.03 (*dt*,  $J = 13.8, 2.8$  Hz, 1H).

**$^{13}C$  NMR** (101 MHz,  $CDCl_3$ )  $\delta$  174.5, 136.2, 128.9, 126.7, 123.4, 122.8, 115.0, 87.7, 70.0, 51.9, 48.4, 45.7, 38.2, 27.8, 21.9, 20.9, 20.7, 19.4.

**GC-MS; EI** (70 eV):  $t_R = 17.03$  Min. [STDHT];  $m/z$  (%) = 283 (21) [ $M^+$ ], 176 (100), 175 (64), 109 (48), 67 (41).

**HRMS (ESI)**  $m/z$ : [ $C_{18}H_{21}NO_2 + H$ ] $^+$  calcd.: 284.1645; found: 284.1645.

**Optical Rotation:**  $[\alpha]_D^{26}$ :  $-87.0$  ( $c = 2.0$ ,  $CHCl_3$ ) [96% *ee*].

**Chiral HPLC:** 96% *ee* [Daicel Chiralpak AD-H, 250 $\times$ 4.6, *i*-PrOH/*n*-heptane = 10/90, 1 mL/min, 210 nm,  $t_R = 8.28$  min (major), 9.81 min (minor)].

#### (3*aS*,4*aR*,10*bS*)-9-methoxy-3*a*,4*a*-dimethyl-3,3*a*,4,4*a*-tetrahydro-2*H*-furo[2',3':2,3]cyclobuta[1,2-*c*]quinolin-5(6*H*)-one (**7g**):

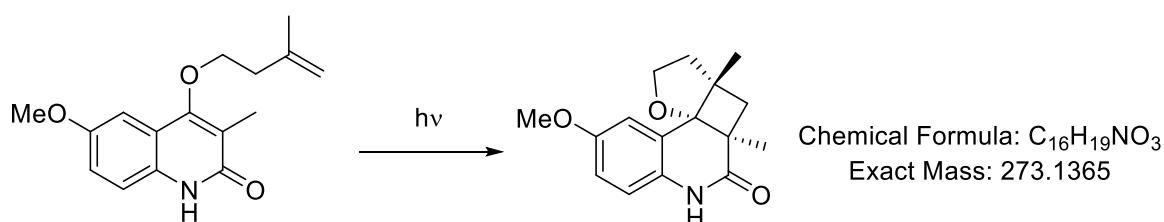

#### *TXT-Catalyzed [2+2] Photocycloaddition*

6-methoxy-3-methyl-4-((3-methylbut-3-en-1-yl)oxy)quinolin-2(1*H*)-one (**5g**) (27.3 mg, 0.1 mmol, 1.0 eq.) and thioxanthenone (TXT) (4.2 mg, 20 mol%) were dissolved in acetonitrile (10 mL, *c* = 10 mmol/L) and reacted for 1 h, as described in *general procedure 5*. Following flash column chromatography (silica, pentane/ethyl acetate 2:1), the racemic compound *rac*-**7g** was obtained as a colorless solid (27.3 mg, 100  $\mu$ mol, >99%).

#### *Enantioselective [2+2] Photocycloaddition*

6-methoxy-3-methyl-4-((3-methylbut-3-en-1-yl)oxy)quinolin-2(1*H*)-one (**5g**) (6.8 mg, 25  $\mu$ mol, 1.0 eq.) and **6** (1.1 mg, 2.5  $\mu$ mol, 10 mol%) were dissolved in  $\alpha,\alpha,\alpha$ -trifluorotoluene (10 mL, *c* = 2.5 mmol/L) and reacted for 1 h at -25 °C, as described in *general procedure 6*. Following flash column chromatography (silica, pentane/ethyl acetate 2:1), the title compound **7g** was obtained as a colorless solid (6.8 mg, 25  $\mu$ mol, >99%, 93% *ee*).

**TLC:**  $R_f$  = 0.66 (Pentane:EtOAc, 1:1.5) [UV].

**M.p.:** 172-174 °C.

**IR** (film)  $\nu_{\max}/\text{cm}^{-1}$  3185, 3046, 2968, 2926, 2872, 1660, 1505, 1458, 1444, 1415, 1388, 1378, 1284, 1226, 1195, 1174, 1151, 1109, 1056, 1041, 995, 930, 869, 853, 811, 798, 696, 666.

**<sup>1</sup>H NMR** (400 MHz, CDCl<sub>3</sub>)  $\delta$  9.03 (*br s*, 1H), 6.80 (*s*, 1H), 6.73 (*d*, *J* = 1.4 Hz, 2H), 4.43 (*t*, *J* = 8.3 Hz, 1H), 4.12 (*ddd*, *J* = 11.4, 9.0, 5.6 Hz, 1H), 3.77 (*s*, 3H), 2.40 (*d*, *J* = 12.8 Hz, 1H), 2.04 (*d*, *J* = 12.8 Hz, 1H), 1.77 (*dd*, *J* = 12.3, 5.2 Hz, 1H), 1.68 (*td*, *J* = 11.8, 8.0 Hz, 1H), 1.38 (*s*, 3H), 0.99 (*s*, 3H).

**<sup>13</sup>C NMR** (101 MHz, CDCl<sub>3</sub>)  $\delta$  176.9, 156.2, 129.8, 123.7, 116.2, 114.5, 111.9, 88.1, 69.4, 55.8, 48.7, 44.3, 42.4, 38.6, 21.5, 18.1.

**GC-MS; EI** (70 eV):  $t_R$  = 16.21 Min. [STDHT];  $m/z$  (%) = 273 (86) [M<sup>+</sup>], 228 (11), 205 (100), 204 (31), 190 (33), 176 (12), 69 (20).

**HRMS (ESI)**  $m/z$ : [C<sub>16</sub>H<sub>19</sub>NO<sub>3</sub>+H]<sup>+</sup> calcd.: 274.1438; found: 274.1439.

**Optical Rotation:**  $[\alpha]_D^{26}$ : -37.0 (*c* = 2.0, CHCl<sub>3</sub>) [93% *ee*].

**Chiral HPLC:** 93% *ee* [Daicel Chiralpak AD-H, 250×4.6, *i*-PrOH/*n*-heptane = 10/90, 1 mL/min, 210 nm,  $t_R$  = 12.44 min (minor), 14.92 min (major)].

#### **(3*aS*,4*aR*,10*bS*)-3*a*,4*a*,9-trimethyl-3,3*a*,4,4*a*-tetrahydro-2*H*-furo[2',3':2,3]cyclobuta[1,2-*c*]quinolin-5(6*H*)-one (7h):**

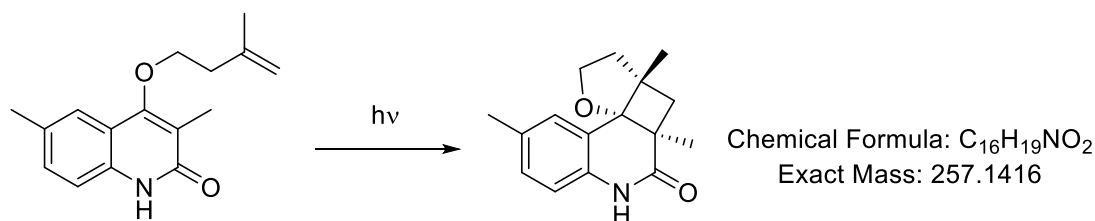

#### *TXT-Catalyzed [2+2] Photocycloaddition*

3,6-dimethyl-4-((3-methylbut-3-en-1-yl)oxy)quinolin-2(1*H*)-one (**5h**) (25.7 mg, 0.1 mmol, 1.0 eq.) and thioxanthenone (TXT) (4.2 mg, 20 mol%) were dissolved in acetonitrile (10 mL, *c* = 10 mmol/L) and reacted

for 1 h, as described in *general procedure 5*. Following flash column chromatography (silica, pentane/ethyl acetate 3:1), the racemic compound *rac*-**7h** was obtained as a colorless solid (25.4 mg, 99  $\mu$ mol, 99%).

#### *Enantioselective [2+2] Photocycloaddition*

3,6-dimethyl-4-((3-methylbut-3-en-1-yl)oxy)quinolin-2(1*H*)-one (**5h**) (6.4 mg, 25  $\mu$ mol, 1.0 eq.) and **6** (1.1 mg, 2.5  $\mu$ mol, 10 mol%) were dissolved in  $\alpha,\alpha,\alpha$ -trifluorotoluene (10 mL,  $c = 2.5$  mmol/L) and reacted for 1 h at -25  $^{\circ}$ C, as described in *general procedure 6*. Following flash column chromatography (silica, pentane/ethyl acetate 3:1), the title compound **7h** was obtained as a colorless solid (6.0 mg, 23.3  $\mu$ mol, 94%, 98% *ee*).

**TLC:**  $R_f = 0.68$  (Pentane:EtOAc, 1:1.5) [UV].

**M.p.:** 176-178  $^{\circ}$ C.

**IR** (film)  $\nu_{\max}/\text{cm}^{-1}$  3177, 3043, 2960, 2924, 2863, 1655, 1602, 1504, 1442, 1387, 1375, 1246, 1151, 1054, 885, 870, 807, 725, 696, 667.

**$^1\text{H}$  NMR** (400 MHz,  $\text{CDCl}_3$ )  $\delta$  8.97 (*br s*, 1H), 7.04 (*s*, 1H), 6.98 (*dd*,  $J = 8.0, 1.3$  Hz, 1H), 6.68 (*d*,  $J = 8.0$  Hz, 1H), 4.44 (*t*,  $J = 8.1$  Hz, 1H), 4.12 (*ddd*,  $J = 11.1, 9.0, 5.7$  Hz, 1H), 2.40 (*d*,  $J = 12.8$  Hz, 1H), 2.28 (*s*, 3H), 2.05 (*d*,  $J = 12.8$  Hz, 1H), 1.77 (*dd*,  $J = 12.2, 5.4$  Hz, 1H), 1.69 (*td*,  $J = 12.0, 8.0$  Hz, 1H), 1.39 (*s*, 3H), 0.99 (*s*, 3H).

**$^{13}\text{C}$  NMR** (101 MHz,  $\text{CDCl}_3$ )  $\delta$  177.1, 133.6, 133.0, 129.5, 126.9, 122.1, 115.0, 88.0, 69.2, 48.5, 44.4, 42.3, 38.5, 21.4, 20.9, 18.0.

**GC-MS; EI** (70 eV):  $t_R = 15.31$  Min. [STDHT];  $m/z$  (%) = 257 (50) [ $\text{M}^+$ ], 242 (8), 212 (13), 189 (100), 160 (15), 69 (19).

**HRMS (ESI)**  $m/z$ : [ $\text{C}_{16}\text{H}_{19}\text{NO}_2 + \text{H}$ ] $^+$  calcd.: 258.1489; found: 258.1490.

**Optical Rotation:**  $[\alpha]_D^{26}$ : -49.0 ( $c = 2.0$ ,  $\text{CHCl}_3$ ) [98% *ee*].

**Chiral HPLC:** 98% *ee* [Daicel Chiralpak AD-H, 250 $\times$ 4.6, *i*-PrOH/*n*-heptane = 10/90, 1 mL/min, 210 nm,  $t_R = 8.74$  min (minor), 10.31 min (major)].

#### (3*aS*,4*aR*,10*bS*)-9-fluoro-3*a*,4*a*-dimethyl-3,3*a*,4,4*a*-tetrahydro-2*H*-furo[2',3':2,3]cyclobuta[1,2-*c*]quinolin-5(6*H*)-one (**7i**):

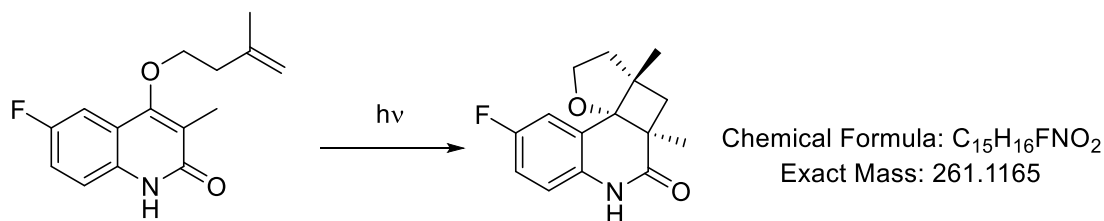

#### *TXT-Catalyzed [2+2] Photocycloaddition*

6-fluoro-3-methyl-4-((3-methylbut-3-en-1-yl)oxy)quinolin-2(1*H*)-one (**5i**) (26.1 mg, 0.1 mmol, 1.0 eq.) and thioxanthone (TXT) (4.2 mg, 20 mol%) were dissolved in acetonitrile (10 mL,  $c = 10$  mmol/L) and reacted for 1 h, as described in *general procedure 5*. Following flash column chromatography (silica, pentane/ethyl acetate 3:1), the racemic compound *rac*-**7i** was obtained as a colorless solid (25.8 mg, 99  $\mu$ mol, 99%).

#### *Enantioselective [2+2] Photocycloaddition*

6-fluoro-3-methyl-4-((3-methylbut-3-en-1-yl)oxy)quinolin-2(1*H*)-one (**5i**) (6.5 mg, 25  $\mu$ mol, 1.0 eq.) and **6** (1.1 mg, 2.5  $\mu$ mol, 10 mol%) were dissolved in  $\alpha,\alpha,\alpha$ -trifluorotoluene (10 mL,  $c = 2.5$  mmol/L) and reacted for 1 h at -25  $^{\circ}$ C, as described in *general procedure 6*. Following flash column chromatography (silica, pentane/ethyl acetate 3:1), the title compound **7i** was obtained as a colorless solid (6.4 mg, 24.5  $\mu$ mol, 98%, 94% *ee*).

**TLC:**  $R_f = 0.60$  (Pentane:EtOAc, 1:1) [UV].

**M.p.:** 163-164  $^{\circ}$ C.

**IR** (film)  $\nu_{\max}/\text{cm}^{-1}$  3193, 3104, 3066, 2963, 2929, 2896, 1659, 1491, 1446, 1416, 1376, 1364, 1251, 1199, 1168, 1148, 1053, 1034, 928, 885, 870, 851, 805, 750, 698, 669.

**$^1\text{H}$  NMR** (400 MHz,  $\text{CDCl}_3$ )  $\delta$  9.64 (*br s*, 1H), 6.96 (dd,  $J = 9.1, 2.8$  Hz, 1H), 6.88 (td,  $J = 8.3, 2.9$  Hz, 1H), 6.80 (dd,  $J = 8.6, 4.7$  Hz, 1H), 4.43 (t,  $J = 8.3$  Hz, 1H), 4.13 (ddd,  $J = 11.4, 9.0, 5.5$  Hz, 1H), 2.40 (d,  $J = 12.9$  Hz, 1H), 2.06 (d,  $J = 12.9$  Hz, 1H), 1.78 (dd,  $J = 12.4, 5.3$  Hz, 1H), 1.68 (td,  $J = 11.8, 7.9$  Hz, 1H), 1.39 (s, 3H), 1.01 (s, 3H).

**$^{19}\text{F}$  NMR** (376 MHz,  $\text{CDCl}_3$ )  $\delta$  -119.3.

**$^{13}\text{C}$  NMR** (101 MHz,  $\text{CDCl}_3$ )  $\delta$  177.5, 159.3 (d,  $J = 241.9$  Hz), 132.3 (d,  $J = 2.4$  Hz), 124.4 (d,  $J = 6.7$  Hz), 116.6 (d,  $J = 7.9$  Hz), 115.7 (d,  $J = 23.2$  Hz), 113.4 (d,  $J = 23.8$  Hz), 87.8, 69.5, 48.9, 44.1, 42.4, 38.5, 21.5, 18.1.

**GC-MS; EI** (70 eV):  $t_R = 14.81$  Min. [STDHT];  $m/z$  (%) = 261 (42) [ $\text{M}^+$ ], 246 (8), 216 (9), 193 (100), 164 (14), 69 (38).

**HRMS (ESI)**  $m/z$ :  $[\text{C}_{15}\text{H}_{16}\text{FNO}_2 + \text{H}]^+$  calcd.: 262.1238; found: 262.1238.

**Optical Rotation:**  $[\alpha]_D^{26}$ : -103.0 ( $c = 2.0$ ,  $\text{CHCl}_3$ ) [94% *ee*].

**Chiral HPLC:** 94% *ee* [Daicel Chiralpak AD-H, 250 $\times$ 4.6, *i*-PrOH/*n*-heptane = 10/90, 1 mL/min, 210 nm,  $t_R = 10.3$  min ((major), 11.7 min (minor)].

**(3*aS*,4*aR*,10*bS*)-9-chloro-3*a*,4*a*-dimethyl-3,3*a*,4,4*a*-tetrahydro-2*H*-furo[2',3':2,3]cyclobuta[1,2-*c*]quinolin-5(6*H*)-one (**7j**):**

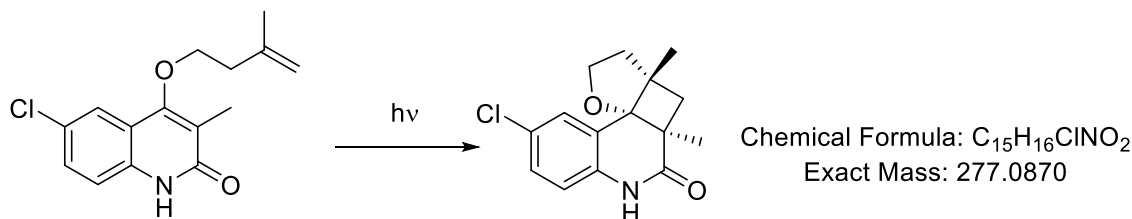

*TXT-Catalyzed [2+2] Photocycloaddition*

6-chloro-3-methyl-4-((3-methylbut-3-en-1-yl)oxy)quinolin-2(1*H*)-one (**5j**) (27.8 mg, 0.1 mmol, 1.0 eq.) and thioxanthenone (TXT) (4.2 mg, 20 mol%) were dissolved in acetonitrile (10 mL,  $c = 10$  mmol/L) and reacted for 1 h, as described in *general procedure 5*. Following flash column chromatography (silica, pentane/ethyl acetate 3:1), the racemic compound *rac*-**7j** was obtained as a colorless solid (26.4 mg, 95  $\mu$ mol, 95%).

*Enantioselective [2+2] Photocycloaddition*

6-chloro-3-methyl-4-((3-methylbut-3-en-1-yl)oxy)quinolin-2(1*H*)-one (**5j**) (6.9 mg, 25  $\mu$ mol, 1.0 eq.) and **6** (1.1 mg, 2.5  $\mu$ mol, 10 mol%) were dissolved in  $\alpha,\alpha,\alpha$ -trifluorotoluene (10 mL,  $c = 2.5$  mmol/L) and reacted

for 1 h at -25 °C, as described in *general procedure 6*. Following flash column chromatography (silica, pentane/ethyl acetate 3:1), the title compound **7j** was obtained as a colorless solid (6.9 mg, 25 μmol, >99%, 93% *ee*).

**TLC:**  $R_f$  = 0.57 (Pentane:EtOAc, 1:1) [UV].

**M.p.:** 183-185 °C.

**IR** (film)  $\nu_{\max}/\text{cm}^{-1}$  3183, 3051, 2961, 2925, 2889, 1662, 1588, 1487, 1445, 1405, 1374, 1363, 1252, 1192, 1091, 1054, 1029, 990, 877, 810, 720, 686, 668.

**<sup>1</sup>H NMR** (500 MHz, CDCl<sub>3</sub>)  $\delta$  9.28 (*br s*, 1H), 7.23 (d,  $J$  = 2.3 Hz, 1H), 7.15 (dd,  $J$  = 8.4, 2.4 Hz, 1H), 6.75 (d,  $J$  = 8.4 Hz, 1H), 4.44 (t,  $J$  = 8.4 Hz, 1H), 4.13 (ddd,  $J$  = 11.4, 9.1, 5.5 Hz, 1H), 2.40 (d,  $J$  = 12.9 Hz, 1H), 2.06 (d,  $J$  = 12.9 Hz, 1H), 1.78 (dd,  $J$  = 12.4, 5.4 Hz, 1H), 1.70 (td,  $J$  = 12.0, 8.0 Hz, 1H), 1.38 (s, 3H), 1.01 (s, 3H).

**<sup>13</sup>C NMR** (101 MHz, CDCl<sub>3</sub>)  $\delta$  177.7, 134.8, 129.0, 128.7, 126.7, 124.2, 116.7, 87.7, 69.5, 49.0, 44.3, 42.4, 38.5, 21.5, 18.1.

**GC-MS; EI** (70 eV):  $t_R$  = 16.02 Min. [STDHT];  $m/z$  (%) = 279 (13) [M+2+], 277 (37) [M+], 211 (38), 209 (100), 180 (11), 69 (44).

**HRMS (ESI)**  $m/z$ : [C<sub>15</sub>H<sub>16</sub>ClNO<sub>2</sub>+H]<sup>+</sup> calcd.: 278.0942; found: 278.0942.

**Optical Rotation:**  $[\alpha]_D^{26}$ : -25.0 ( $c$  = 2.0, CHCl<sub>3</sub>) [93% *ee*].

**Chiral HPLC:** 93% *ee* [Daicel Chiralpak AD-H, 250×4.6, *i*-PrOH/*n*-heptane = 10/90, 1 mL/min, 210 nm,  $t_R$  = 9.89 min (major), 10.98 min (minor)].

**(3*aS*,4*aR*,10*bS*)-3*a*,4*a*-dimethyl-5-oxo-3,3*a*,4,4*a*,5,6-hexahydro-2*H*-furo[2',3':2,3]cyclobuta[1,2-*c*]quinoline-9-carbonitrile (**7k**):**

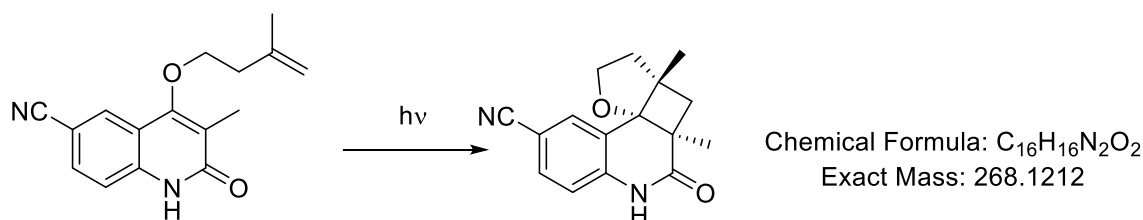

*TXT-Catalyzed [2+2] Photocycloaddition*

3-methyl-4-((3-methylbut-3-en-1-yl)oxy)-2-oxo-1,2-dihydroquinoline-6-carbonitrile (**5k**) (26.8 mg, 0.1 mmol, 1.0 eq.) and thioxanthenone (TXT) (4.2 mg, 20 mol%) were dissolved in acetonitrile (10 mL,  $c$  = 10 mmol/L) and reacted for 1 h, as described in *general procedure 5*. Following flash column chromatography (silica, pentane/ethyl acetate 2:1), the racemic compound *rac*-**7k** was obtained as a colorless solid (26.5 mg, 99 μmol, 99%).

*Enantioselective [2+2] Photocycloaddition*

3-methyl-4-((3-methylbut-3-en-1-yl)oxy)-2-oxo-1,2-dihydroquinoline-6-carbonitrile (**5k**) (6.7 mg, 25 μmol, 1.0 eq.) and **6** (1.1 mg, 2.5 μmol, 10 mol%) were dissolved in  $\alpha,\alpha,\alpha$ -trifluorotoluene (17 mL,  $c$  = 1.5 mmol/L) and reacted for 1.5 h at -25 °C, as modified in *general procedure 6*. Following flash column chromatography (silica, pentane/ethyl acetate 2:1), the title compound **7k** was obtained as a colorless solid (6.3 mg, 23.5 μmol, 94%, 96% *ee*).

**TLC:**  $R_f$  = 0.54 (Pentane:EtOAc, 1:1) [UV].

**M.p.:** 210-213 °C.

**IR** (film)  $\nu_{\max}/\text{cm}^{-1}$  3185, 3054, 2955, 2888, 2227, 1665, 1606, 1596, 1499, 1443, 1353, 1307, 1255, 1195, 1140, 1056, 1039, 902, 887, 822, 731, 700.

**$^1\text{H}$  NMR** (400 MHz,  $\text{CDCl}_3$ )  $\delta$  9.52 (*br s*, 1H), 7.57 (d,  $J$  = 1.7 Hz, 1H), 7.49 (dd,  $J$  = 8.2, 1.9 Hz, 1H), 6.89 (d,  $J$  = 8.2 Hz, 1H), 4.48 (t,  $J$  = 8.4 Hz, 1H), 4.14 (ddd,  $J$  = 11.4, 9.2, 5.6 Hz, 1H), 2.42 (d,  $J$  = 13.0 Hz, 1H), 2.10 (d,  $J$  = 13.0 Hz, 1H), 1.82 (dd,  $J$  = 12.6, 5.3 Hz, 1H), 1.71 (td,  $J$  = 11.9, 8.0 Hz, 1H), 1.40 (s, 3H), 1.01 (s, 3H).

**$^{13}\text{C}$  NMR** (101 MHz,  $\text{CDCl}_3$ )  $\delta$  177.8, 139.9, 133.2, 131.3, 123.9, 119.0, 115.9, 107.0, 87.2, 69.7, 49.3, 44.6, 42.4, 38.5, 21.5, 18.2.

**GC-MS; EI** (70 eV):  $t_R$  = 15.42 Min. [STDHT];  $m/z$  (%) = 268 (58) [ $\text{M}^+$ ], 253 (10), 223 (9), 200 (100), 171 (18), 145 (13), 69 (97).

**HRMS (ESI)**  $m/z$ : [ $\text{C}_{16}\text{H}_{16}\text{N}_2\text{O}_2 + \text{H}$ ] $^+$  calcd.: 269.1285; found: 269.1285.

**Optical Rotation:**  $[\alpha]_D^{26}$ : +30.5 ( $c$  = 1.0,  $\text{CHCl}_3$ ) [96% *ee*].

**Chiral HPLC:** 96% *ee* [Daicel Chiralpak AD-H, 250×4.6, *i*-PrOH/*n*-heptane = 10/90, 1 mL/min, 210 nm,  $t_R$  = 15.02 min (major), 16.73 min (minor)].

**(3a*S*,4a*R*,10b*S*)-3a,4a,8-trimethyl-3,3a,4,4a-tetrahydro-2*H*-furo[2',3':2,3]cyclobuta[1,2-*c*]quinolin-5(6*H*)-one (71):**

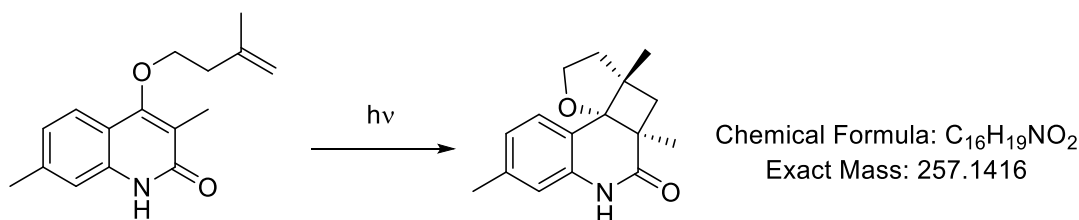

**TXT-Catalyzed [2+2] Photocycloaddition**

3,7-dimethyl-4-((3-methylbut-3-en-1-yl)oxy)quinolin-2(1*H*)-one (**5I**) (25.7 mg, 0.1 mmol, 1.0 eq.) and thioxanthenone (TXT) (4.2 mg, 20 mol%) were dissolved in acetonitrile (10 mL,  $c$  = 10 mmol/L) and reacted for 1 h, as described in *general procedure 5*. Following flash column chromatography (silica, pentane/ethyl acetate 3:1), the racemic compound *rac*-**71** was obtained as a colorless solid (25.5 mg, 99  $\mu\text{mol}$ , 99%).

**Enantioselective [2+2] Photocycloaddition**

3,7-dimethyl-4-((3-methylbut-3-en-1-yl)oxy)quinolin-2(1*H*)-one (**5I**) (6.4 mg, 25  $\mu\text{mol}$ , 1.0 eq.) and **6** (1.1 mg, 2.5  $\mu\text{mol}$ , 10 mol%) were dissolved in  $\alpha,\alpha,\alpha$ -trifluorotoluene (10 mL,  $c$  = 2.5 mmol/L) and reacted for 1 h at -25 °C, as described in *general procedure 6*. Following flash column chromatography (silica, pentane/ethyl acetate 3:1), the title compound **71** was obtained as a colorless solid (6.4 mg, 25  $\mu\text{mol}$ , >99%, 98% *ee*).

**TLC:**  $R_f$  = 0.61 (Pentane:EtOAc, 1:1) [UV].

**M.p.:** 178-180 °C.

**IR** (film)  $\nu_{\max}/\text{cm}^{-1}$  3194, 3083, 3043, 2996, 2963, 2920, 2878, 1659, 1630, 1588, 1487, 1441, 1396, 1372, 1363, 1265, 1194, 1056, 1020, 903, 873, 853, 831, 801, 667, 654.

**<sup>1</sup>H NMR** (500 MHz, CDCl<sub>3</sub>) δ 8.27 (*br s*, 1H), 7.13 (*d*, *J* = 7.8 Hz, 1H), 6.84 (*d*, *J* = 7.8 Hz, 1H), 6.53 (*s*, 1H), 4.42 (*t*, *J* = 8.4 Hz, 1H), 4.11 (*ddd*, *J* = 11.4, 9.0, 5.6 Hz, 1H), 2.38 (*d*, *J* = 12.8 Hz, 1H), 2.29 (*s*, 3H), 2.04 (*d*, *J* = 12.8 Hz, 1H), 1.76 (*dd*, *J* = 11.0, 6.3 Hz, 1H), 1.67 (*td*, *J* = 11.8, 8.0 Hz, 1H), 1.38 (*s*, 3H), 0.97 (*s*, 3H).

**<sup>13</sup>C NMR** (101 MHz, CDCl<sub>3</sub>) δ 177.7, 139.1, 136.0, 126.7, 124.5, 119.5, 115.8, 88.0, 69.2, 48.5, 44.6, 42.4, 38.6, 21.6, 21.3, 18.2.

**GC-MS; EI** (70 eV): *t<sub>R</sub>* = 15.42 Min. [STDHT]; *m/z* (%) = 257 (46) [M<sup>+</sup>], 242 (9), 212 (14), 189 (100), 160 (18), 134 (15), 69 (19).

**HRMS (ESI)** *m/z*: [C<sub>16</sub>H<sub>19</sub>NO<sub>2</sub>+H]<sup>+</sup> calcd.: 258.1489; found: 258.1490.

**Optical Rotation:** [α]<sub>D</sub><sup>26</sup>: −66.0 (*c* = 2.0, CHCl<sub>3</sub>) [98% *ee*].

**Chiral HPLC:** 98% *ee* [Daicel Chiralpak AD-H, 250×4.6, *i*-PrOH/*n*-heptane = 10/90, 1 mL/min, 210 nm, *t<sub>R</sub>* = 11.74 min ((major), 13.05 min (minor)].

**(3*aS*,4*aR*,10*bS*)-4*a*-ethyl-3*a*-methyl-3,3*a*,4,4*a*-tetrahydro-2*H*-furo[2',3':2,3]cyclobuta[1,2-*c*]quinolin-5(6*H*)-one (7*m*):**

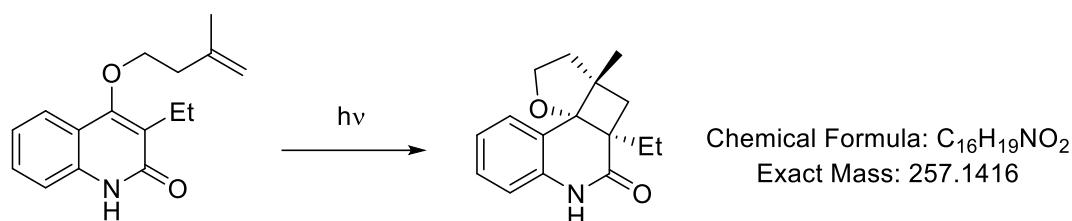

*TXT*-Catalyzed [2+2] Photocycloaddition

3-ethyl-4-((3-methylbut-3-en-1-yl)oxy)quinolin-2(1*H*)-one (**5m**) (25.7 mg, 0.1 mmol, 1.0 eq.) and thioxanthenone (TXT) (4.2 mg, 20 mol%) were dissolved in acetonitrile (10 mL, *c* = 10 mmol/L) and reacted for 1 h, as described in *general procedure 5*. Following flash column chromatography (silica, pentane/ethyl acetate 3:1), the racemic compound *rac*-**7m** was obtained as a colorless solid (25.5 mg, 99 μmol, 99%).

*Enantioselective* [2+2] Photocycloaddition

3-ethyl-4-((3-methylbut-3-en-1-yl)oxy)quinolin-2(1*H*)-one (**5m**) (6.4 mg, 25 μmol, 1.0 eq.) and **6** (1.1 mg, 2.5 μmol, 10 mol%) were dissolved in α,α,α-trifluorotoluene (10 mL, *c* = 2.5 mmol/L) and reacted for 1 h at −25 °C, as described in *general procedure 6*. Following flash column chromatography (silica, pentane/ethyl acetate 3:1), the title compound **7m** was obtained as a colorless solid (6.2 mg, 24.5 μmol, 97%, 93% *ee*).

**TLC:** *R<sub>f</sub>* = 0.72 (Pentane:EtOAc, 1:1) [UV].

**M.p.:** 157–158 °C.

**IR** (film) *ν*<sub>max</sub>/cm<sup>−1</sup> 3216, 3064, 2964, 2928, 2864, 1657, 1613, 1594, 1486, 1440, 1372, 1249, 1061, 1046, 1019, 949, 905, 895, 769, 744, 729, 672.

**<sup>1</sup>H NMR** (400 MHz, CDCl<sub>3</sub>) δ 9.09 (*br s*, 1H), 7.23 (*dd*, *J* = 7.6, 1.2 Hz, 1H), 7.17 (*td*, *J* = 7.7, 1.5 Hz, 1H), 7.01 (*td*, *J* = 7.5, 1.1 Hz, 1H), 6.78 (*dd*, *J* = 7.8, 0.9 Hz, 1H), 4.45 (*t*, *J* = 8.0 Hz, 1H), 4.14 (*ddd*, *J* = 11.2, 8.9, 5.7 Hz, 1H), 2.34 (*d*, *J* = 12.8 Hz, 1H), 2.03 (*d*, *J* = 12.8 Hz, 1H), 1.89 (*q*, *J* = 7.4 Hz, 2H), 1.75 (*dd*, *J* = 12.3, 5.3 Hz, 1H), 1.68 (*td*, *J* = 12.0, 8.0 Hz, 1H), 0.97 (*s*, 3H), 0.81 (*t*, *J* = 7.4 Hz, 3H).

**<sup>13</sup>C NMR** (101 MHz, CDCl<sub>3</sub>) δ 176.8, 136.0, 128.9, 126.1, 123.6, 115.2, 87.6, 69.7, 49.3, 48.3, 41.4, 38.5, 26.9, 21.6, 9.8.

**GC-MS; EI** (70 eV): *t<sub>R</sub>* = 15.04 Min. [STDHT]; *m/z* (%) = 257 (47) [M<sup>+</sup>], 212 (36), 189 (100), 174 (89), 161 (25), 146 (14), 69 (27).

**HRMS (ESI)** *m/z*: [C<sub>16</sub>H<sub>19</sub>NO<sub>2</sub>+H]<sup>+</sup> calcd.: 258.1489; found: 258.1489.

**Optical Rotation:** [α]<sub>D</sub><sup>26</sup>: −101.0 (*c* = 2.0, CHCl<sub>3</sub>) [93% *ee*].

**Chiral HPLC:** 93% *ee* [Daicel Chiralpak AD-H, 250×4.6, *i*-PrOH/*n*-heptane = 10/90, 1 mL/min, 210 nm, *t<sub>R</sub>* = 8.7 min (minor), 9.8 min (major)].

**(3*aS*,4*aR*,10*bS*)-8-fluoro-3*a*,4*a*-dimethyl-3,3*a*,4,4*a*-tetrahydro-2*H*-furo[2',3':2,3]cyclobuta[1,2-*c*]quinolin-5(6*H*)-one (7*n*):**

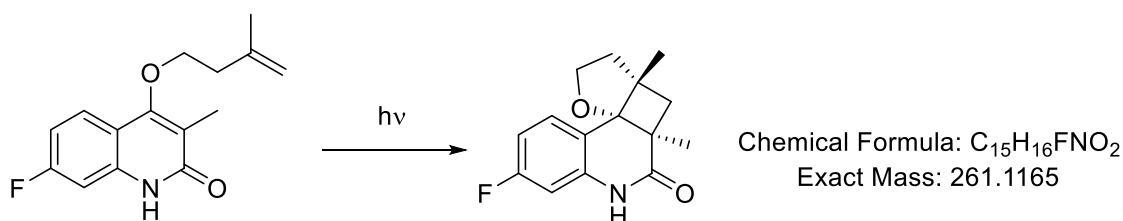

*TXT-Catalyzed [2+2] Photocycloaddition*

7-fluoro-3-methyl-4-((3-methylbut-3-en-1-yl)oxy)quinolin-2(1*H*)-one (**5n**) (26.1 mg, 0.1 mmol, 1.0 eq.) and thioxanthenone (TXT) (4.2 mg, 20 mol%) were dissolved in acetonitrile (10 mL, *c* = 10 mmol/L) and reacted for 1 h, as described in *general procedure 5*. Following flash column chromatography (silica, pentane/ethyl acetate 4:1), the racemic compound *rac*-**7n** was obtained as a colorless solid (25.9 mg, 99 μmol, 99%).

*Enantioselective [2+2] Photocycloaddition*

7-fluoro-3-methyl-4-((3-methylbut-3-en-1-yl)oxy)quinolin-2(1*H*)-one (**5n**) (6.5 mg, 25 μmol, 1.0 eq.) and **6** (1.1 mg, 2.5 μmol, 10 mol%) were dissolved in α,α,α-trifluorotoluene (10 mL, *c* = 2.5 mmol/L) and reacted for 1 h at −25 °C, as described in *general procedure 6*. Following flash column chromatography (silica, pentane/ethyl acetate 4:1), the title compound **7n** was obtained as a colorless solid (6.5 mg, 25 μmol, >99%, 99% *ee*).

**TLC:** *R<sub>f</sub>* = 0.69 (Pentane:EtOAc, 1:1) [UV].

**M.p.:** 167–168 °C.

**IR** (film) *ν*<sub>max</sub>/cm<sup>−1</sup> 3196, 3095, 3051, 2962, 2925, 2887, 1663, 1607, 1490, 1443, 1404, 1375, 1366, 1271, 1194, 1152, 1108, 1054, 1019, 987, 904, 846, 810, 755, 685, 667.

**<sup>1</sup>H NMR** (400 MHz, CDCl<sub>3</sub>) δ 9.17 (*br s*, 1H), 7.21 (*dd*, *J* = 8.5, 6.2 Hz, 1H), 6.71 (*td*, *J* = 8.5, 2.4 Hz, 1H), 6.55 (*dd*, *J* = 9.4, 2.4 Hz, 1H), 4.42 (*t*, *J* = 8.4 Hz, 1H), 4.12 (*ddd*, *J* = 11.3, 9.1, 5.5 Hz, 1H), 2.39 (*d*, *J* = 12.9 Hz, 1H), 2.06 (*d*, *J* = 12.9 Hz, 1H), 1.78 (*dd*, *J* = 12.4, 5.4 Hz, 1H), 1.68 (*td*, *J* = 12.0, 8.0 Hz, 1H), 1.39 (*s*, 3H), 0.99 (*s*, 3H).

**<sup>19</sup>F NMR** (376 MHz, CDCl<sub>3</sub>) δ −112.7.

**<sup>13</sup>C NMR** (101 MHz, CDCl<sub>3</sub>) δ 177.8, 163.1 (*d*, *J* = 246.1 Hz), 137.5 (*d*, *J* = 10.7 Hz), 128.6 (*d*, *J* = 9.4 Hz), 118.2 (*d*, *J* = 3.0 Hz), 110.3 (*d*, *J* = 21.3 Hz), 102.6 (*d*, *J* = 25.7 Hz), 87.7, 69.3, 48.6, 44.6, 42.4, 38.5, 21.6, 18.2.



**GC-MS; EI** (70 eV):  $t_R$  = 14.66 Min. [STDHT];  $m/z$  (%) = 261 (5) [ $M^+$ ], 246 (7), 216 (9), 193 (100), 164 (15), 138 (14), 69 (36).

**HRMS (ESI)**  $m/z$ :  $[C_{15}H_{16}FNO_2+H]^+$  calcd.: 262.1238; found: 262.1238.

**Optical Rotation:**  $[\alpha]_D^{26}$ : -57.0 ( $c$  = 2.0,  $CHCl_3$ ) [99% *ee*].

**Chiral HPLC:** 99% *ee* [Daicel Chiralpak AD-H, 250×4.6, *i*-PrOH/*n*-heptane = 10/90, 1 mL/min, 210 nm,  $t_R$  = 10.65 min (minor), 11.95 min (major)].

**(3a*R*,4a*R*,10b*S*)-3a,4,4-trifluoro-4a-methyl-3,3a,4,4a-tetrahydro-2*H*-furo[2',3':2,3]cyclobuta[1,2-*c*]quinolin-5(6*H*)-one (9):**

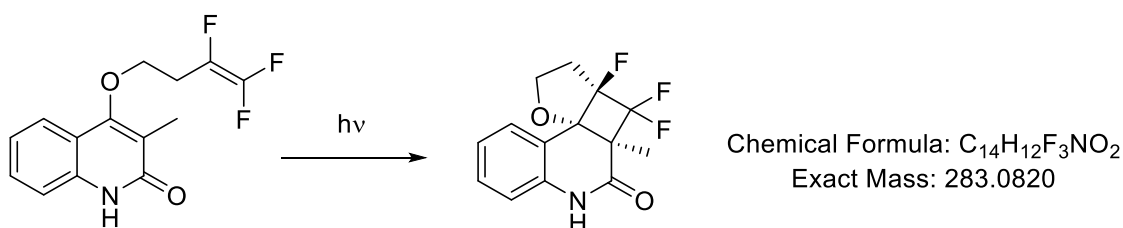

*TXT-Catalyzed [2+2] Photocycloaddition*

3-methyl-4-((3,4,4-trifluorobut-3-en-1-yl)oxy)quinolin-2(1*H*)-one (**8**) (28.3 mg, 0.1 mmol, 1.0 eq.) and thioxanthenone (TXT) (4.2 mg, 20 mol%) were dissolved in acetonitrile (10 mL,  $c$  = 10 mmol/L) and reacted for 1 h, as described in *general procedure 5*. Following flash column chromatography (silica, pentane/ethyl acetate 3:1), the racemic compound *rac*-**9** was obtained as a colorless solid (27.4 mg, 97  $\mu$ mol, 97%).

*Enantioselective [2+2] Photocycloaddition*

3-methyl-4-((3,4,4-trifluorobut-3-en-1-yl)oxy)quinolin-2(1*H*)-one (**8**) (7.1 mg, 25  $\mu$ mol, 1.0 eq.) and **6** (1.1 mg, 2.5  $\mu$ mol, 10 mol%) were dissolved in  $\alpha,\alpha,\alpha$ -trifluorotoluene (10 mL,  $c$  = 2.5 mmol/L) and reacted for 2 h at -65 °C, as modified in *general procedure 6*. Following flash column chromatography (silica, pentane/ethyl acetate 3:1), the title compound **9** was obtained as a colorless solid (5.1 mg, 18.0  $\mu$ mol, 72%, 81% *ee*).

**TLC:**  $R_f$  = 0.32 (Pentane:EtOAc, 4:1) [UV].

**M.p.:** 162-163 °C.

**IR** (film)  $\nu_{max}/cm^{-1}$  3195, 3120, 3064, 2988, 2954, 2921, 2888, 1669, 1595, 1495, 1449, 1438, 1389, 1381, 1324, 1301, 1250, 1234, 1213, 1155, 1145, 1127, 1106, 1083, 1049, 989, 871, 848, 815, 804, 752, 691.

**$^1H$  NMR** (500 MHz,  $CDCl_3$ )  $\delta$  9.08 (*br s*, 1H), 7.34-7.30 (m, 2H), 7.12 (t,  $J$  = 7.6 Hz, 1H), 6.85 (d,  $J$  = 7.9 Hz, 1H), 4.56 (*virt. td*,  $J \approx J$  = 8.5 Hz,  $J$  = 7.5 Hz, 1H), 4.32 (*virt. td*,  $J \approx J$  = 8.5 Hz,  $J$  = 7.5 Hz, 1H), 2.80 (*virt. tt*,  $J \approx J$  = 14.5 Hz,  $J \approx J$  = 7.5 Hz, 1H), 2.54 (*virt. ttd*,  $J \approx J$  = 14.5 Hz,  $J \approx J$  = 7.5 Hz,  $J$  = 7.0 Hz, 1H), 1.55 (s, 3H).

**$^{19}F$  NMR** (376 MHz,  $CDCl_3$ )  $\delta$  -109.8 (dd,  $J$  = 208.8, 9.1 Hz), -119.5 (dd,  $J$  = 208.8, 9.2 Hz), -168.4 (t,  $J$  = 9.1 Hz).

**$^{13}C$  NMR** (101 MHz,  $CDCl_3$ )  $\delta$  166.2, 135.6, 130.7, 129.0, 124.0, 116.3, 116.2 (d,  $J$  = 2.5 Hz), 116.1 (ddd,  $J$  = 298.0, 284.8, 24.4 Hz), 106.6 (ddd,  $J$  = 245.9, 29.3, 20.4 Hz), 83.8 (ddd,  $J$  = 21.4, 14.0, 4.5 Hz), 70.3 (d,  $J$  = 4.2 Hz), 55.2 (ddd,  $J$  = 23.5, 20.5, 6.8 Hz), 32.1 (d,  $J$  = 21.7 Hz), 12.4 (d,  $J$  = 4.6 Hz).

**GC-MS; EI** (70 eV):  $t_R$  = 14.82 Min. [STDHT];  $m/z$  (%) = 283 (22) [ $M^+$ ], 269 (16), 268 (100), 175 (24), 174 (25), 159 (9), 146 (10), 130 (11), 120 (8), 105 (10).

**HRMS (ESI)**  $m/z$ : [ $C_{14}H_{12}F_3NO_2+H$ ] $^+$  calcd.: 284.0893; found: 284.0893.

**Optical Rotation**:  $[\alpha]_D^{26}$ : -50.0 ( $c$  = 2.0,  $CHCl_3$ ) [81% *ee*].

**Chiral HPLC**: 81% *ee* [Daicel Chiralpak AD-H, 250×4.6, *i*-PrOH/*n*-heptane = 10/90, 1 mL/min, 210 nm,  $t_R$  = 22.59 min (major), 25.65 min (minor)].

**(3a*R*,4a*R*,10b*S*)-4a-methyl-4-methylene-3,3a,4,4a-tetrahydro-2*H*-furo[2',3':2,3]cyclobuta[1,2-*c*]quinolin-5(6*H*)-one (11a):**

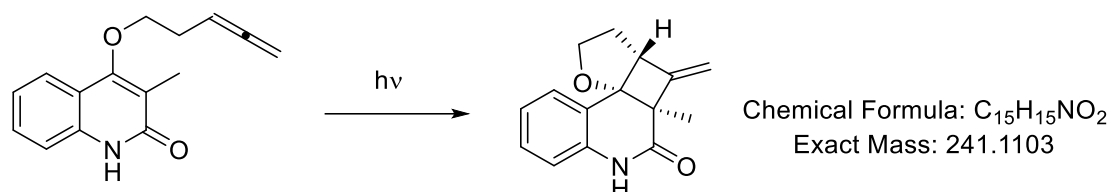

*TXT-Catalyzed [2+2] Photocycloaddition*

4-((4λ<sup>5</sup>-penta-3,4-dien-1-yl)oxy)-3-methylquinolin-2(1*H*)-one (**10a**) (24.1 mg, 0.1 mmol, 1.0 eq.) and thioxanthenone (TXT) (4.2 mg, 20 mol%) were dissolved in acetonitrile (10 mL,  $c$  = 10 mmol/L) and reacted for 1.5 h, as described in *general procedure 5*. Following flash column chromatography (silica, pentane/ethyl acetate 4:1), the racemic compound *rac*-**11a** was obtained as a colorless solid (21.7 mg, 90 μmol, 90%).

*Enantioselective [2+2] Photocycloaddition*

4-((4λ<sup>5</sup>-penta-3,4-dien-1-yl)oxy)-3-methylquinolin-2(1*H*)-one (**10a**) (6.0 mg, 25 μmol, 1.0 eq.) and **6** (1.1 mg, 2.5 μmol, 10 mol%) were dissolved in α,α,α-trifluorotoluene (10 mL,  $c$  = 2.5 mmol/L) and reacted for 1.5 h at -25 °C, as described in *general procedure 6*. Following flash column chromatography (silica, pentane/ethyl acetate 4:1), the title compound **11a** was obtained as a colorless solid (5.1 mg, 21.1 μmol, 85%, 91% *ee*).

**TLC**:  $R_f$  = 0.41 (Pentane:EtOAc, 2:1) [UV].

**M.p.**: 181-183 °C.

**IR** (film)  $\nu_{max}/cm^{-1}$  3189, 3061, 2975, 2929, 2892, 1667, 1594, 1492, 1478, 1441, 1368, 1353, 1253, 1212, 1104, 1053, 995, 967, 939, 906, 872, 854, 769, 747, 681.

**<sup>1</sup>H NMR** (500 MHz,  $CDCl_3$ )  $\delta$  8.90 (*br s*, 1H), 7.37 (dd,  $J$  = 7.7, 1.3 Hz, 1H), 7.21 (td,  $J$  = 7.7, 1.5 Hz, 1H), 7.04 (td,  $J$  = 7.6, 1.1 Hz, 1H), 6.80 (d,  $J$  = 7.9 Hz, 1H), 5.44 (dd,  $J$  = 2.6, 0.9 Hz, 1H), 5.09 (dd,  $J$  = 2.2, 1.0 Hz, 1H), 4.46 (td,  $J$  = 8.0, 0.5 Hz, 1H), 4.13 (ddd,  $J$  = 11.0, 8.6, 5.9 Hz, 1H), 3.65-3.47 (m, 1H), 2.07-1.95 (m, 2H), 1.45 (s, 3H).

**<sup>13</sup>C NMR** (101 MHz,  $CDCl_3$ )  $\delta$  173.0, 152.2, 135.4, 129.0, 125.9, 124.3, 123.6, 115.4, 109.7, 85.4, 70.7, 56.3, 55.3, 31.0, 16.5.

**GC-MS; EI** (70 eV):  $t_R$  = 16.16 Min. [STDHT];  $m/z$  (%) = 241 (27) [ $M^+$ ], 240 (39), 226 (100), 212 (20), 198 (15), 186(26), 175 (11), 120 (8), 77 (9).

**HRMS (ESI)**  $m/z$ : [ $C_{15}H_{15}NO_2+H$ ] $^+$  calcd.: 242.1176; found: 242.1177.

**Optical Rotation**:  $[\alpha]_D^{26}$ : +105.0 ( $c$  = 2.0,  $CHCl_3$ ) [91% *ee*].

**Chiral HPLC:** 91% *ee* [Daicel Chiralpak AD-H, 250×4.6, *i*-PrOH/*n*-heptane = 10/90, 1 mL/min, 210 nm, *t<sub>R</sub>* = 11.57 min (major), 20.73 min (minor)].

**(3*aR*,4*aR*,10*bS*)-3*a*,4*a*-dimethyl-4-methylene-3,3*a*,4,4*a*-tetrahydro-2*H*-furo[2',3':2,3]cyclobuta[1,2-*c*]quinolin-5(6*H*)-one (11*b*):**

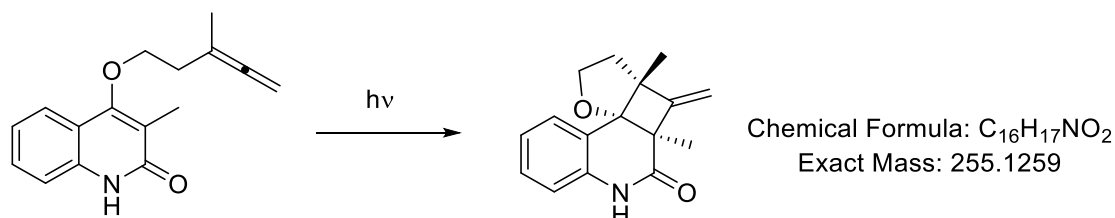

#### *TXT-Catalyzed [2+2] Photocycloaddition*

3-methyl-4-((3-methyl-4λ<sup>5</sup>-penta-3,4-dien-1-yl)oxy)quinolin-2(1*H*)-one (**10b**) (25.5 mg, 0.1 mmol, 1.0 eq.) and thioxanthenone (TXT) (4.2 mg, 20 mol%) were dissolved in acetonitrile (10 mL, *c* = 10 mmol/L) and reacted for 1.5 h, as described in *general procedure 5*. Following flash column chromatography (silica, pentane/ethyl acetate 4:1), the racemic compound *rac*-**11b** was obtained as a colorless solid (23.7 mg, 93 μmol, 93%).

#### *Enantioselective [2+2] Photocycloaddition*

3-methyl-4-((3-methyl-4λ<sup>5</sup>-penta-3,4-dien-1-yl)oxy)quinolin-2(1*H*)-one (**10b**) (6.4 mg, 25 μmol, 1.0 eq.) and **6** (1.1 mg, 2.5 μmol, 10 mol%) were dissolved in α,α,α-trifluorotoluene (10 mL, *c* = 2.5 mmol/L) and reacted for 1.5 h at -25 °C, as described in *general procedure 6*. Following flash column chromatography (silica, pentane/ethyl acetate 4:1), the title compound **11b** was obtained as a colorless solid (6.3 mg, 24.8 μmol, 98%, 96% *ee*).

**TLC:** *R<sub>f</sub>* = 0.54 (Pentane:EtOAc, 2:1) [UV].

**M.p.:** 174-175 °C.

**IR** (film)  $\nu_{\text{max}}$ /cm<sup>-1</sup> 3196, 3061, 2976, 2925, 2873, 1659, 1594, 1489, 1435, 1366, 1354, 1309, 1245, 1054, 898, 851, 759, 675.

**<sup>1</sup>H NMR** (400 MHz, CDCl<sub>3</sub>)  $\delta$  9.00 (*br s*, 1H), 7.33 (*d*, *J* = 7.6 Hz, 1H), 7.21 (*td*, *J* = 7.7, 1.5 Hz, 1H), 7.05 (*td*, *J* = 7.6, 1.0 Hz, 1H), 6.81 (*dd*, *J* = 7.6, 0.4 Hz, 1H), 5.42 (*d*, *J* = 1.0 Hz, 1H), 5.10 (*d*, *J* = 1.0 Hz, 1H), 4.35 (*t*, *J* = 8.2 Hz, 1H), 4.07 (*ddd*, *J* = 11.6, 8.8, 5.3 Hz, 1H), 2.02 (*dd*, *J* = 12.2, 5.1 Hz, 1H), 1.78 (*td*, *J* = 11.9, 7.9 Hz, 1H), 1.48 (*s*, 3H), 1.00 (*s*, 3H).

**<sup>13</sup>C NMR** (101 MHz, CDCl<sub>3</sub>)  $\delta$  173.3, 157.7, 135.9, 129.1, 126.9, 123.6, 121.8, 115.4, 108.1, 87.5, 69.4, 60.8, 53.6, 38.9, 20.5, 16.8.

**GC-MS; EI** (70 eV): *t<sub>R</sub>* = 15.03 Min. [STDHT]; *m/z* (%) = 255 (1) [*M*<sup>+</sup>], 241 (23), 240 (100), 175 (23), 146 (6), 120 (6), 79 (10).

**HRMS (ESI)** *m/z*: [C<sub>16</sub>H<sub>17</sub>NO<sub>2</sub>+H]<sup>+</sup> *calcd.*: 256.1332; *found*: 256.1334.

**Optical Rotation:** [ $\alpha$ ]<sub>D</sub><sup>26</sup>: +95.0 (*c* = 2.0, CHCl<sub>3</sub>) [96% *ee*].

**Chiral HPLC:** 96% *ee* [Daicel Chiralpak AD-H, 250×4.6, *i*-PrOH/*n*-heptane = 10/90, 1 mL/min, 210 nm, *t<sub>R</sub>* = 9.13 min (major), 12.56 min (minor)].

**(3a*R*,4a*R*,10b*S*)-9-chloro-3a,4a-dimethyl-4-methylene-3,3a,4,4a-tetrahydro-2*H*-furo[2',3':2,3]-cyclobuta[1,2-*c*]quinolin-5(6*H*)-one (11c):**

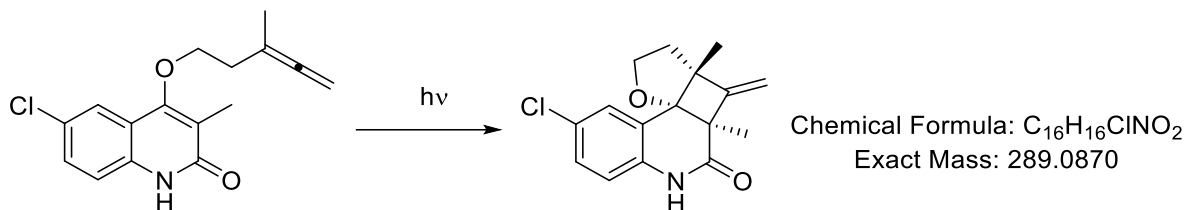

*TXT-Catalyzed [2+2] Photocycloaddition*

6-chloro-3-methyl-4-((3-methyl-4λ<sup>5</sup>-penta-3,4-dien-1-yl)oxy)quinolin-2(1*H*)-one (**10c**) (29.0 mg, 0.1 mmol, 1.0 eq.) and thioxanthenone (TXT) (4.2 mg, 20 mol%) were dissolved in acetonitrile (20 mL, *c* = 5 mmol/L) and reacted for 1.5 h, as described in *general procedure 5*. Following flash column chromatography (silica, pentane/ethyl acetate 5:1), the racemic compound *rac*-**11c** was obtained as a colorless solid (28.0 mg, 97 μmol, 97%).

*Enantioselective [2+2] Photocycloaddition*

6-chloro-3-methyl-4-((3-methyl-4λ<sup>5</sup>-penta-3,4-dien-1-yl)oxy)quinolin-2(1*H*)-one (**10c**) (7.2 mg, 25 μmol, 1.0 eq.) and **6** (1.1 mg, 2.5 μmol, 10 mol%) were dissolved in α,α,α-trifluorotoluene (16.7 mL, *c* = 1.5 mmol/L) and reacted for 2.5 h at -25 °C, as described in *general procedure 6*. Following flash column chromatography (silica, pentane/ethyl acetate 5:1), the title compound **11c** was obtained as a colorless solid (7.0 mg, 24.2 μmol, 97%, 91% *ee*).

**TLC:** R<sub>f</sub> = 0.70 (Pentane:EtOAc, 2:1) [UV].

**M.p.:** 172-173 °C.

**IR** (film) ν<sub>max</sub>/cm<sup>-1</sup> 3193, 3068, 2970, 2881, 1675, 1592, 1491, 1410, 1367, 1356, 1250, 1094, 1056, 898, 846, 688.

**<sup>1</sup>H NMR** (500 MHz, CDCl<sub>3</sub>) δ 9.50 (*br s*, 1H), 7.31 (*d*, *J* = 2.4 Hz, 1H), 7.17 (*dd*, *J* = 8.4, 2.4 Hz, 1H), 6.80 (*d*, *J* = 8.4 Hz, 1H), 5.42 (*d*, *J* = 1.2 Hz, 1H), 5.11 (*d*, *J* = 1.2 Hz, 1H), 4.36 (*t*, *J* = 8.2 Hz, 1H), 4.06 (*ddd*, *J* = 11.6, 8.8, 5.3 Hz, 1H), 2.02 (*dd*, *J* = 12.3, 5.1 Hz, 1H), 1.78 (*dt*, *J* = 12.0, 7.8 Hz, 1H), 1.46 (*s*, 3H), 1.02 (*s*, 3H).

**<sup>13</sup>C NMR** (101 MHz, CDCl<sub>3</sub>) δ 173.5, 157.2, 134.6, 129.1, 128.8, 126.8, 123.6, 116.8, 108.5, 87.2, 69.6, 61.1, 53.3, 38.8, 20.4, 16.7.

**GC-MS; EI** (70 eV): *t*<sub>R</sub> = 16.32 Min. [STDHT]; *m/z* (%) = 289 (2) [M<sup>+</sup>], 277 (8), 276 (45), 275 (23), 274 (100), 209 (19), 79 (13).

**HRMS (ESI)** *m/z*: [C<sub>16</sub>H<sub>16</sub>ClNO<sub>2</sub>+H]<sup>+</sup> calcd.: 290.0942; found: 290.0943.

**Optical Rotation:** [α]<sub>D</sub><sup>24</sup>: +134.5 (*c* = 1.0, CHCl<sub>3</sub>) [91% *ee*].

**Chiral HPLC:** 91% *ee* [Daicel Chiralpak AD-H, 250×4.6, *i*-PrOH/*n*-heptane = 10/90, 1 mL/min, 210 nm, *t*<sub>R</sub> = 8.64 min (major), 11.15 min (minor)].

**(3a*R*,4a*R*,10b*S*)-4a-ethyl-3a-methyl-4-methylene-3,3a,4,4a-tetrahydro-2*H*-furo[2',3':2,3]cyclobuta[1,2-*c*]quinolin-5(6*H*)-one (11d):**

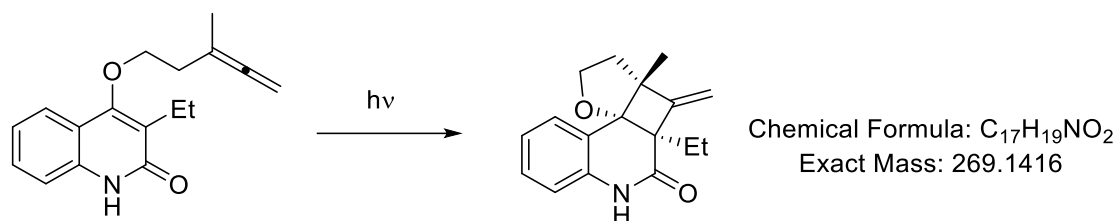

#### *TXT-Catalyzed [2+2] Photocycloaddition*

3-ethyl-4-((3-methyl-4λ<sup>5</sup>-penta-3,4-dien-1-yl)oxy)quinolin-2(1*H*)-one (**10d**) (26.9 mg, 0.1 mmol, 1.0 eq.) and thioxanthenone (TXT) (4.2 mg, 20 mol%) were dissolved in acetonitrile (10 mL, *c* = 10 mmol/L) and reacted for 1.5 h, as described in *general procedure 5*. Following flash column chromatography (silica, pentane/ethyl acetate 6:1), the racemic compound *rac*-**11d** was obtained as a colorless solid (25.0 mg, 93 μmol, 93%).

#### *Enantioselective [2+2] Photocycloaddition*

3-ethyl-4-((3-methyl-4λ<sup>5</sup>-penta-3,4-dien-1-yl)oxy)quinolin-2(1*H*)-one (**10d**) (6.7 mg, 25 μmol, 1.0 eq.) and **6** (1.1 mg, 2.5 μmol, 10 mol%) were dissolved in α,α,α-trifluorotoluene (10 mL, *c* = 2.5 mmol/L) and reacted for 2 h at -25 °C, as described in *general procedure 6*. Following flash column chromatography (silica, pentane/ethyl acetate 6:1), the title compound **11d** was obtained as a colorless solid (6.0 mg, 22.3 μmol, 90%, 92% *ee*).

**TLC:** R<sub>f</sub> = 0.59 (Pentane:EtOAc, 2:1) [UV].

**M.p.:** 166-167 °C.

**IR** (film)  $\nu_{\text{max}}$ /cm<sup>-1</sup> 3190, 3066, 2974, 2934, 2877, 1659, 1595, 1490, 1435, 1352, 1310, 1193, 1057, 1046, 1013, 893, 871, 845, 757, 671.

**<sup>1</sup>H NMR** (500 MHz, CDCl<sub>3</sub>)  $\delta$  8.93 (*br s*, 1H), 7.32 (*dd*, *J* = 7.6, 1.1 Hz, 1H), 7.20 (*td*, *J* = 7.7, 1.5 Hz, 1H), 7.04 (*td*, *J* = 7.6, 1.0 Hz, 1H), 6.80 (*dd*, *J* = 7.9, 0.7 Hz, 1H), 5.38 (*d*, *J* = 0.9 Hz, 1H), 5.08 (*d*, *J* = 0.9 Hz, 1H), 4.37 (*t*, *J* = 8.2 Hz, 1H), 4.09 (*ddd*, *J* = 11.6, 8.7, 5.3 Hz, 1H), 2.12 (*dq*, *J* = 14.8, 7.4 Hz, 1H), 2.00 (*dd*, *J* = 12.2, 5.2 Hz, 1H), 1.90 (*dq*, *J* = 14.5, 7.3 Hz, 1H), 1.77 (*td*, *J* = 11.8, 7.9 Hz, 1H), 0.99 (*s*, 3H), 0.82 (*t*, *J* = 7.4 Hz, 3H).

**<sup>13</sup>C NMR** (101 MHz, CDCl<sub>3</sub>)  $\delta$  172.6, 157.0, 135.7, 128.9, 126.3, 123.6, 123.0, 115.4, 108.1, 87.3, 69.9, 60.4, 58.4, 38.6, 25.5, 20.6, 9.7.

**GC-MS; EI** (70 eV): *t*<sub>R</sub> = 15.23 Min. [STDHT]; *m/z* (%) = 269 (1) [M<sup>+</sup>], 241 (24), 240 (100), 189 (7), 174 (18), 146 (5), 79 (6).

**HRMS (ESI)** *m/z*: [C<sub>17</sub>H<sub>20</sub>NO<sub>2</sub>+H]<sup>+</sup> calcd.: 270.1489; found: 270.1489.

**Optical Rotation:** [ $\alpha$ ]<sub>D</sub><sup>24</sup>: +88.5 (*c* = 1.0, CHCl<sub>3</sub>) [92% *ee*].

**Chiral HPLC:** 92% *ee* [Daicel Chiralpak AD-H, 250×4.6, *i*-PrOH/*n*-heptane = 10/90, 1 mL/min, 210 nm, *t*<sub>R</sub> = 7.57 min (major), 10.34 min (minor)].

**(4*aR*,10*bS*)-9-chloro-4*a*-methyl-4,4*a*-dihydro-2*H*-furo[2',3':2,3]cyclobuta[1,2-*c*]quinolin-5(6*H*)-one (13a):**

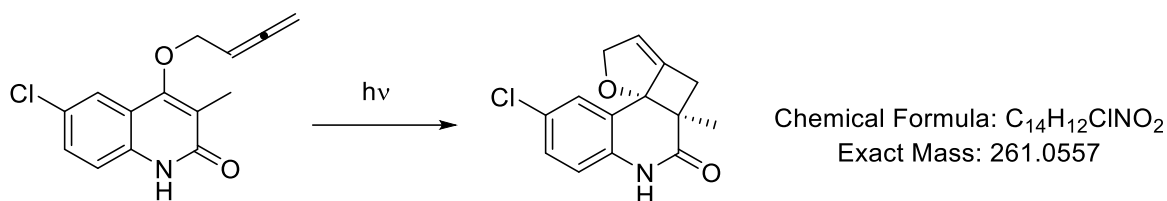

#### TXT-Catalyzed [2+2] Photocycloaddition

4-((3λ<sup>5</sup>-buta-2,3-dien-1-yl)oxy)-6-chloro-3-methylquinolin-2(1*H*)-one (**12a**) (26.2 mg, 0.1 mmol, 1.0 eq.) and thioxanthenone (TXT) (4.2 mg, 20 mol%) were dissolved in acetonitrile (20 mL, *c* = 5 mmol/L) and reacted for 1 h, as described in *general procedure 5*. Following flash column chromatography (silica, pentane/ethyl acetate 3.5:1), the racemic compound *rac*-**13a** was obtained as a colorless solid (22.0 mg, 84 μmol, 84%).

#### Enantioselective [2+2] Photocycloaddition

4-((3λ<sup>5</sup>-buta-2,3-dien-1-yl)oxy)-6-chloro-3-methylquinolin-2(1*H*)-one (**12a**) (6.5 mg, 25 μmol, 1.0 eq.) and **6** (1.1 mg, 2.5 μmol, 10 mol%) were dissolved in α,α,α-trifluorotoluene (16.7 mL, *c* = 1.5 mmol/L) and reacted for 1.5 h at -25 °C, as modified in *general procedure 6*. Following flash column chromatography (silica, pentane/ethyl acetate 3.5:1), the title compound **13a** was obtained as a colorless solid (5.5 mg, 21.0 μmol, 85%, 88% *ee*).

**TLC:** R<sub>f</sub> = 0.36 (Pentane:EtOAc, 2:1) [UV].

**M.p.:** 210-212 °C.

**IR** (film)  $\nu_{\text{max}}$ /cm<sup>-1</sup> 3204, 3086, 2990, 2940, 2863, 1670, 1589, 1488, 1390, 1368, 1248, 1140, 1071, 1029, 1005, 959, 834, 779, 757, 679.

**<sup>1</sup>H NMR** (500 MHz, CDCl<sub>3</sub>) δ 7.98 (*br s*, 1H), 7.36 (*d*, *J* = 2.3 Hz, 1H), 7.22 (*dd*, *J* = 8.5, 2.3 Hz, 1H), 6.68 (*d*, *J* = 8.5 Hz, 1H), 5.74 (*tt*, *J* = 2.5, 1.2 Hz, 1H), 5.33 (*ddt*, *J* = 13.0, 3.0, 1.5 Hz, 1H), 4.84 (*ddd*, *J* = 12.5, 2.8, 1.1 Hz, 1H), 2.93 (*ddt*, *J* = 12.5, 2.5, 1.2 Hz, 1H), 2.53 (*d*, *J* = 12.3 Hz, 1H), 1.44 (*s*, 3H).

**<sup>13</sup>C NMR** (101 MHz, DMSO-*d*<sub>6</sub>) δ 168.7, 142.3, 135.3, 129.4, 128.5, 126.1, 124.2, 117.6, 117.3, 92.4, 80.4, 48.5, 40.0, 13.3.

**GC-MS; EI** (70 eV): *t*<sub>R</sub> = 15.79 Min. [STDHT]; *m/z* (%) = 263 (2) [*M*+2<sup>+</sup>], 262 (4) [*M*+1<sup>+</sup>], 261 (6) [*M*+], 260 (11), 248 (34), 246 (100), 234 (8), 232 (21), 218 (10), 126 (11), 79 (21).

**HRMS (ESI)** *m/z*: [C<sub>14</sub>H<sub>12</sub>ClNO<sub>2</sub>+H]<sup>+</sup> calcd.: 262.0629; found: 262.0630.

**Optical Rotation:** [α]<sub>D</sub><sup>24</sup>: -142.0 (*c* = 1.0, CHCl<sub>3</sub>) [88% *ee*].

**Chiral HPLC:** 88% *ee* [Daicel Chiralpak AS-H, 250×4.6, *i*-PrOH/*n*-heptane = 30/70, 1 mL/min, 210 nm, *t*<sub>R</sub> = 9.03 min (minor), 12.59 min (major)].

#### 5-methyl-4,7-dihydrobenzo[*b*]furo[2,3-*d*]azocin-6(5*H*)-one (*rac*-**14b**):

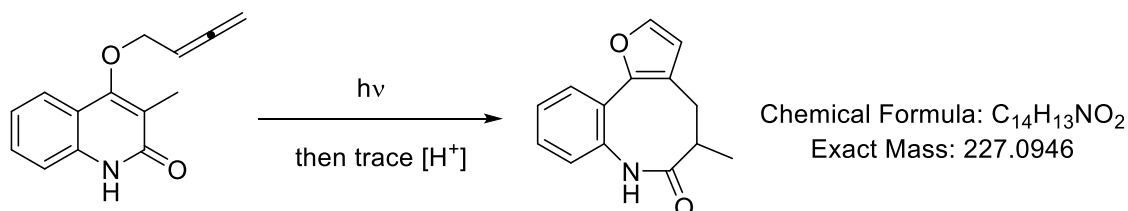

4-((3 $\lambda^5$ -buta-2,3-dien-1-yl)oxy)-3-methylquinolin-2(1*H*)-one (**12b**) (22.7 mg, 0.1 mmol, 1.0 eq.) and thioxanthenone (TXT) (4.2 mg, 20 mol%) were dissolved in acetonitrile (10 mL, *c* = 10 mmol/L) and reacted at 0 °C for 1 h, as described in *general procedure 5*, then with traces of acid such as H<sub>2</sub>SO<sub>4</sub> (0.5 mol%) for 0.5 h. Following flash column chromatography (silica, pentane/ethyl acetate 3.5:1), the racemic compound *rac*-**14b** was obtained as a colorless solid (21.7 mg, 96  $\mu$ mol, 96%).

**TLC:** *R*<sub>f</sub> = 0.35 (Pentane:EtOAc, 2:1) [UV].

**M.p.:** 175-176 °C.

**IR** (film)  $\nu_{\text{max}}$ /cm<sup>-1</sup> 3184, 3058, 2939, 2903, 1659, 1576, 1491, 1419, 1400, 1290, 1156, 1056, 1047, 892, 809, 757, 714, 675.

**<sup>1</sup>H NMR** (400 MHz, CDCl<sub>3</sub>)  $\delta$  8.34 (*br s*, 1H), 7.62-7.56 (m, 1H), 7.41 (d, *J* = 1.8 Hz, 1H), 7.38-7.31 (m, 2H), 7.21-7.14 (m, 1H), 6.27 (d, *J* = 1.8 Hz, 1H), 3.04 (dq, *J* = 12.0, 6.4, 4.8 Hz, 1H), 2.86 (dd, *J* = 16.6, 12.0 Hz, 1H), 2.79 (dd, *J* = 16.6, 4.8 Hz, 1H), 1.15 (d, *J* = 6.4 Hz, 3H).

**<sup>13</sup>C NMR** (101 MHz, CDCl<sub>3</sub>)  $\delta$  178.0, 145.4, 142.7, 134.1, 130.5, 129.4, 129.0, 126.9, 125.6, 121.0, 113.3, 33.0, 32.4, 17.4.

**GC-MS; EI** (70 eV): *t*<sub>R</sub> = 15.05 Min. [STDHT]; *m/z* (%) = 228 (16) [*M*+1+], 227 (100) [*M*+], 210 (20), 199 (55), 198 (39), 184 (86), 170 (90), 115 (30).

**HRMS (ESI)** *m/z*: [C<sub>14</sub>H<sub>13</sub>NO<sub>2</sub>+H]<sup>+</sup> calcd.: 228.1019; found: 228.1020.

**(4a*R*,10b*S*)-4,4,4a-trimethyl-4,4a-dihydro-2*H*-furo[2',3':2,3]cyclobuta[1,2-*c*]quinolin-5(6*H*)-one (16) and (2*S*,3'*S*)-3'-methyl-3-(prop-1-en-2-yl)-1'*H*,5*H*-spiro[furan-2,4'-quinolin]-2'(3'*H*)-one (18):**

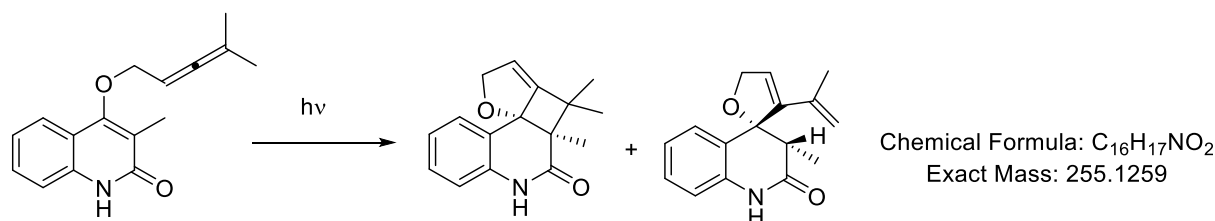

#### *TXT-Catalyzed [2+2] Photocycloaddition*

3-methyl-4-((4-methyl-3 $\lambda^5$ -penta-2,3-dien-1-yl)oxy)quinolin-2(1*H*)-one (**15**) (25.5 mg, 0.1 mmol, 1.0 eq.) and thioxanthenone (TXT) (4.2 mg, 20 mol%) were dissolved in acetonitrile (10 mL, *c* = 10 mmol/L) and reacted for 1 h, as described in *general procedure 5*. Following flash column chromatography (silica, pentane/diethylether 1:1), the racemic compound *rac*-**16** was obtained as a colorless solid (11.2 mg, 44  $\mu$ mol, 44%), along with *rac*-**18** as a colorless solid (14.0 mg, 55  $\mu$ mol, 55%).

#### *Enantioselective [2+2] Photocycloaddition*

3-methyl-4-((4-methyl-3 $\lambda^5$ -penta-2,3-dien-1-yl)oxy)quinolin-2(1*H*)-one (**15**) (6.4 mg, 25  $\mu$ mol, 1.0 eq.) and **6** (1.1 mg, 2.5  $\mu$ mol, 10 mol%) were dissolved in  $\alpha,\alpha,\alpha$ -trifluorotoluene (10 mL, *c* = 2.5 mmol/L) and reacted for 1 h at -25 °C, as modified in *general procedure 6*. Following flash column chromatography (silica, pentane/diethylether 1:1), the title compound **16** was obtained as a colorless solid (3.2 mg, 12.5  $\mu$ mol, 50%, 98% *ee*), along with title compound **18** as a colorless solid (3.0 mg, 11.8  $\mu$ mol, 47%, 92% *ee*).

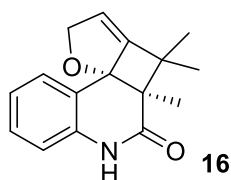

**TLC:**  $R_f$  = 0.48 (Pentane:Et<sub>2</sub>O, 1:3) [UV].

**M.p.:** 175-176 °C.

**IR** (film)  $\nu_{\max}/\text{cm}^{-1}$  3209, 3063, 2925, 2855, 1665, 1597, 1491, 1375, 1237, 1028, 1008, 754.

**<sup>1</sup>H NMR** (400 MHz, CDCl<sub>3</sub>)  $\delta$  8.50 (*br s*, 1H), 7.39 (d,  $J$  = 7.1 Hz, 1H), 7.22 (td,  $J$  = 7.9, 1.4 Hz, 1H), 7.06 (td,  $J$  = 7.6, 1.0 Hz, 1H), 6.71 (dd,  $J$  = 8.0, 0.7 Hz, 1H), 5.73 (dd,  $J$  = 3.3, 1.5 Hz, 1H), 5.27 (dd,  $J$  = 12.5, 1.5 Hz, 1H), 4.72 (dd,  $J$  = 12.5, 3.3 Hz, 1H), 1.29 (s, 3H), 1.22 (s, 3H), 1.14 (s, 3H).

**<sup>13</sup>C NMR** (101 MHz, CDCl<sub>3</sub>)  $\delta$  170.9, 152.0, 136.1, 129.6, 124.9, 123.8, 117.3, 115.5, 91.9, 79.5, 54.7, 52.6, 23.5, 21.4, 12.3.

**GC-MS; EI** (70 eV):  $t_R$  = 15.56 Min. [STDHT];  $m/z$  (%) = 255 (1) [M<sup>+</sup>], 241 (17), 240 (100), 212 (11), 120 (13), 79 (8).

**HRMS (ESI)**  $m/z$ : [C<sub>16</sub>H<sub>17</sub>NO<sub>2</sub>+H]<sup>+</sup> calcd.: 256.1332; found: 256.1333.

**Optical Rotation:**  $[\alpha]_D^{24}$ : -153.5 (c = 1.0, CHCl<sub>3</sub>) [98% *ee*].

**Chiral HPLC:** 98% *ee* [Daicel Chiralpak AD-H, 250×4.6, *i*-PrOH/*n*-heptane = 10/90, 1 mL/min, 210 nm,  $t_R$  = 8.87 min (major), 15.18 min (minor)].

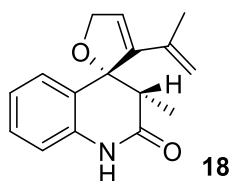

**TLC:**  $R_f$  = 0.40 (Pentane:Et<sub>2</sub>O, 1:3) [UV].

**M.p.:** 160-161 °C.

**IR** (film)  $\nu_{\max}/\text{cm}^{-1}$  3237, 2924, 2852, 1665, 1595, 1488, 1458, 1366, 1260, 1241, 1059, 1015, 923, 890, 757, 732, 654.

**<sup>1</sup>H NMR** (400 MHz, CDCl<sub>3</sub>)  $\delta$  8.41 (*br s*, 1H), 7.24 (td,  $J$  = 7.6, 1.2 Hz, 1H), 7.09 (d,  $J$  = 7.3 Hz, 1H), 6.96 (td,  $J$  = 7.6, 0.9 Hz, 1H), 6.84 (d,  $J$  = 7.9 Hz, 1H), 6.29 (s, 1H), 5.03 (s, 1H), 4.693 (d,  $J$  = 13.6 Hz, 1H), 4.686 (s, 1H), 4.61 (d,  $J$  = 14.4 Hz, 1H), 3.29 (q,  $J$  = 6.8 Hz, 1H), 2.06 (s, 3H), 1.20 (d,  $J$  = 6.8 Hz, 3H).

**<sup>13</sup>C NMR** (101 MHz, CDCl<sub>3</sub>)  $\delta$  172.2, 139.7, 136.6, 135.4, 129.6, 128.9, 127.6, 125.9, 122.9, 116.7, 116.0, 91.7, 74.3, 43.0, 22.6, 8.1.

**GC-MS; EI** (70 eV):  $t_R$  = 16.05 Min. [STDHT];  $m/z$  (%) = 255 (32) [M<sup>+</sup>], 240 (30), 212 (24), 198 (16), 185 (93), 184 (100), 130 (13), 79 (26).

**HRMS (ESI)**  $m/z$ : [C<sub>16</sub>H<sub>17</sub>NO<sub>2</sub>+H]<sup>+</sup> calcd.: 256.1332; found: 256.1334.

**Optical Rotation:**  $[\alpha]_D^{24}$ : +139.5 (c = 1.0, CHCl<sub>3</sub>) [92% *ee*].

**Chiral HPLC:** 92% *ee* [Daicel Chiralpak AD-H, 250×4.6, *i*-PrOH/*n*-heptane = 30/70, 1 mL/min, 210 nm,  $t_R$  = 10.51 min (minor), 23.82 min (major)].



## 7. X-ray Crystallographic Detail

Data were collected on a single crystal x-ray diffractometer equipped with a CMOS detector (Bruker APEX III,  $\kappa$ -CMOS), an IMS micro source with MoK $\alpha$  radiation ( $\lambda = 0.71073$  Å) and a Helios optic using the APEX3 software package.<sup>7</sup> Measurements were performed on single crystals coated with perfluorinated ether. The crystals were fixed on top of a kapton micro sampler and frozen under a stream of cold nitrogen. A matrix scan was used to determine the initial lattice parameters. Reflections were corrected for Lorentz and polarisation effects, scan speed, and background using SAINT.<sup>8</sup> Absorption correction, including odd and even ordered spherical harmonics was performed using SADABS.<sup>8</sup> Space group assignments were based upon systematic absences, E statistics, and successful refinement of the structures. The structures were solved using SHELXT with the aid of successive difference Fourier maps, and were refined against all data using SHELXL in conjunction with SHELXLE.<sup>9-11</sup> Hydrogen atoms (except on heteroatoms) were calculated in ideal positions as follows: Methyl hydrogen atoms were refined as part of rigid rotating groups, with a C–H distance of 0.98 Å and  $U_{\text{iso(H)}} = 1.5 \cdot U_{\text{eq(C)}}$ . Other H atoms were placed in calculated positions and refined using a riding model, with methylene and aromatic C–H distances of 0.99 Å and 0.95 Å, respectively, other C–H distances of 1.00 Å, all with  $U_{\text{iso(H)}} = 1.2 \cdot U_{\text{eq(C)}}$ . Non-hydrogen atoms were refined with anisotropic displacement parameters. Full-matrix least-squares refinements were carried out by minimizing  $\sum w(F_o^2 - F_c^2)^2$  with the SHELXL weighting scheme.<sup>9</sup> Neutral atom scattering factors for all atoms and anomalous dispersion corrections for the non-hydrogen atoms were taken from *International Tables for Crystallography*.<sup>12</sup> Images of the crystal structures were generated with Mercury (main article)<sup>13</sup> and PLATON (SI).<sup>14</sup>

### Stereochemistry determination **7j** via X-ray crystallographic analysis

Product **7j** was crystallized as a colorless crystal via slow vaporization of EtOH solution at room temperature, and its absolute configuration was determined by x-ray structure analysis. The CCDC number was 1988524. The supplementary crystallographic data that could be obtained free of charge from The Cambridge Crystallographic Data Centre via [www.ccdc.cam.ac.uk/data\\_request/cif](http://www.ccdc.cam.ac.uk/data_request/cif)

**Compound 7j (CCDC 1988524)**

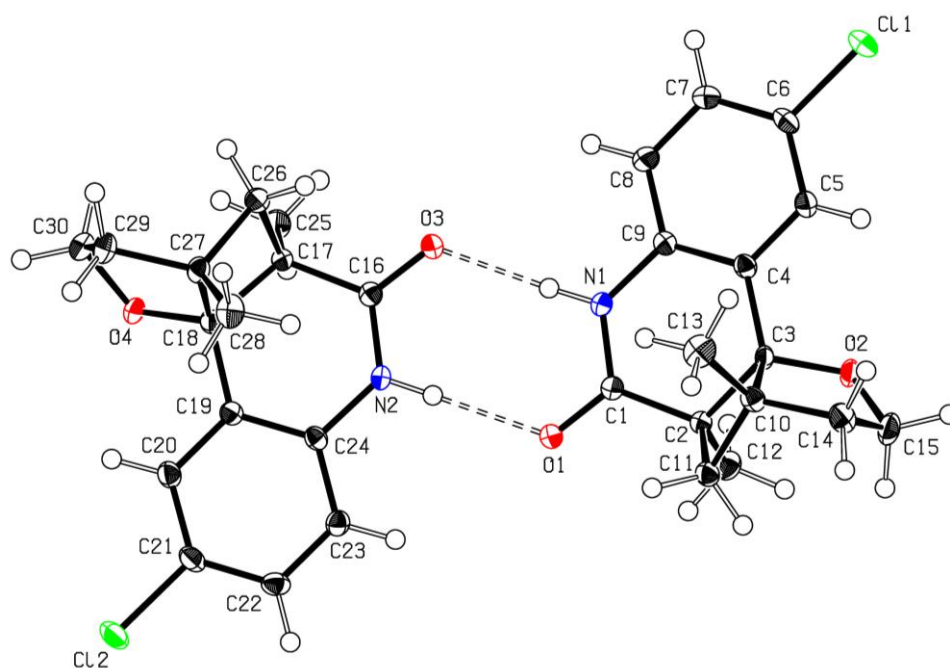

Diffraction operator C. Jandl  
scanspeed 2-10 s per frame  
dx 37 mm  
3405 frames measured in 13 data sets  
phi-scans with  $\Delta\phi = 0.5$   
omega-scans with  $\Delta\omega = 0.5$   
shutterless mode

*Crystal data*

$C_{15}H_{16}ClNO_2 \cdot H_2O$

$M_r = 295.75$

Monoclinic,  $P2_1$

Hall symbol:  $P\ 2_1yb$

$a = 10.1162\ (9)\ \text{\AA}$

$b = 13.1872\ (13)\ \text{\AA}$

$c = 11.1569\ (12)\ \text{\AA}$

$\beta = 94.081\ (4)^\circ$

$V = 1484.6\ (3)\ \text{\AA}^3$

$Z = 4$

$F(000) = 624$

$D_x = 1.323\ \text{Mg m}^{-3}$

Melting point: 458 K

Mo  $K\alpha$  radiation,  $\lambda = 0.71073\ \text{\AA}$

Cell parameters from 9992 reflections

$\theta = 2.5\text{--}27.1^\circ$

$\mu = 0.26\ \text{mm}^{-1}$

$T = 100\ \text{K}$

Fragment, colourless

$0.46 \times 0.23 \times 0.17\ \text{mm}$

### Data collection

Bruker Photon CMOS  
diffractometer 6269 independent reflections

Radiation source: IMS microsource 6217 reflections with  $I > 2\sigma(I)$

Helios optic monochromator  $R_{\text{int}} = \underline{0.030}$

Detector resolution: 16 pixels  $\text{mm}^{-1}$   $\theta_{\text{max}} = \underline{26.7}^\circ$ ,  $\theta_{\text{min}} = \underline{2.0}^\circ$

phi- and omega-rotation scans  $h = \underline{-12}$  12

Absorption correction: multi-scan  
SADABS 2016/2, Bruker  $k = \underline{-16}$  16

$T_{\text{min}} = \underline{0.730}$ ,  $T_{\text{max}} = \underline{0.746}$   $l = \underline{-14}$  14

90432 measured reflections

### Refinement

Refinement on  $F^2$  Hydrogen site location: mixed

Least-squares matrix: full H atoms treated by a mixture of independent and constrained refinement

$R[F^2 > 2\sigma(F^2)] = \underline{0.022}$   $W = 1/[\Sigma^2(FO^2) + (0.0321P)^2 + 0.3053P]$   
WHERE  $P = (FO^2 + 2FC^2)/3$

$wR(F^2) = \underline{0.058}$   $(\Delta/\sigma)_{\text{max}} = \underline{0.001}$

$S = \underline{1.06}$   $\Delta\rho_{\text{max}} = \underline{0.24} \text{ e } \text{\AA}^{-3}$

6269 reflections  $\Delta\rho_{\text{min}} = \underline{-0.26} \text{ e } \text{\AA}^{-3}$

389 parameters Extinction correction: none

1 restraint Extinction coefficient: -

0 constraints Absolute structure: Flack<sup>9,10</sup>

Primary atom site location: intrinsic phasing Absolute structure parameter: 0.004 (6)

Secondary atom site location: difference

Fourier map

## 8. NMR-Spectra of New Compounds

### 4-chloro-3-methylquinoline 1-oxide (D):

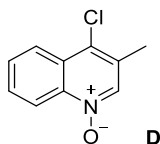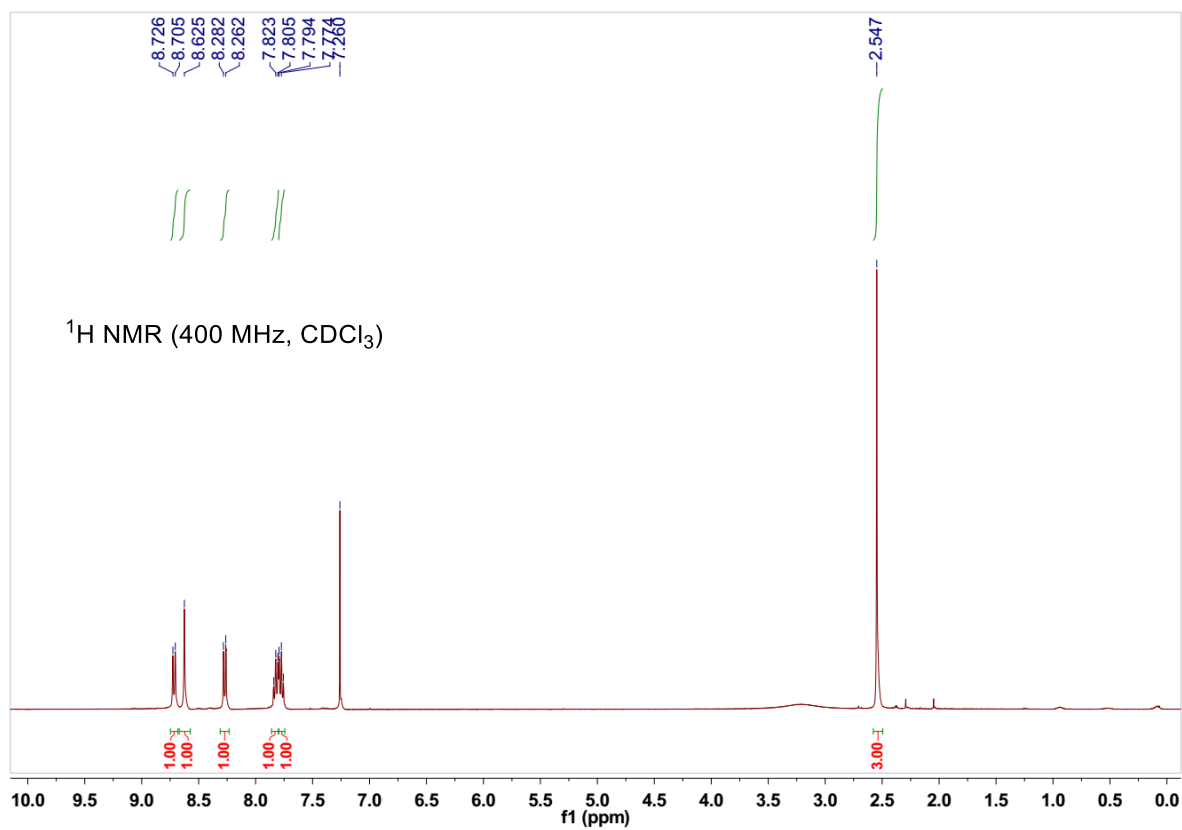

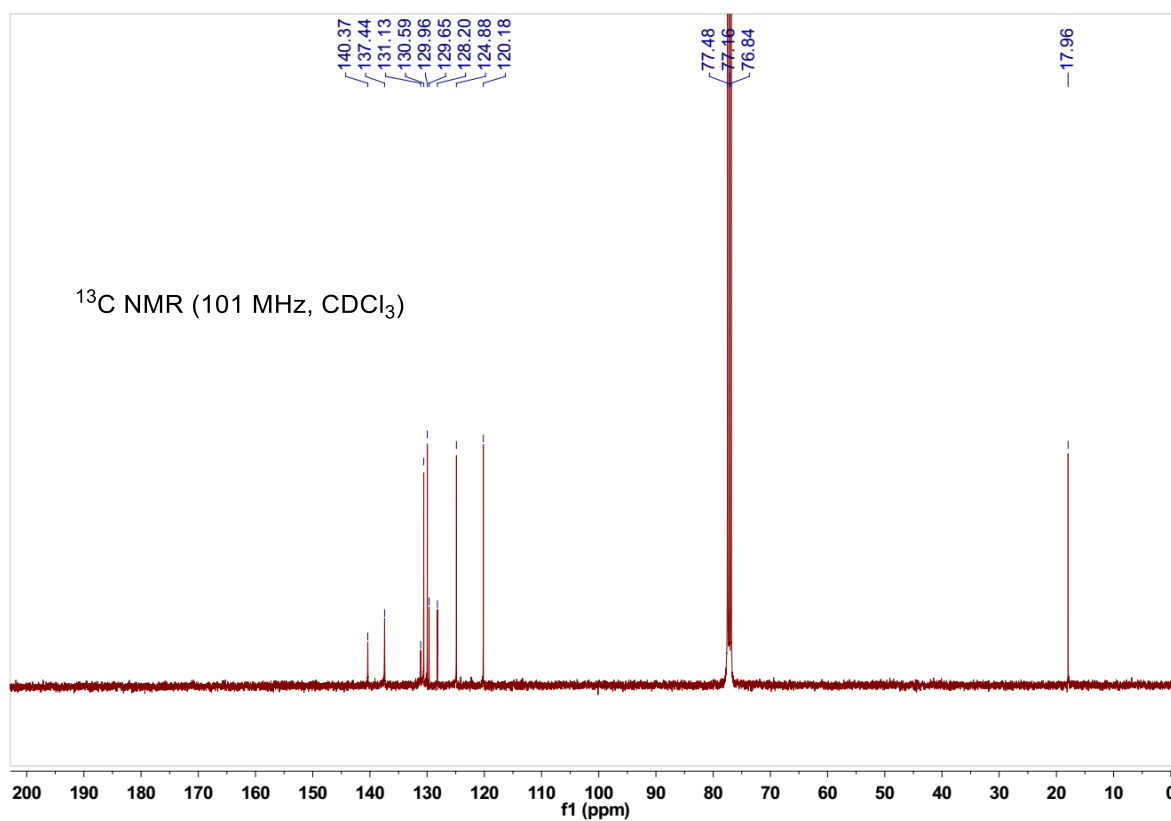

**4-(but-3-en-1-yloxy)-3-methylquinoline 1-oxide (Eb):**

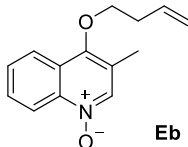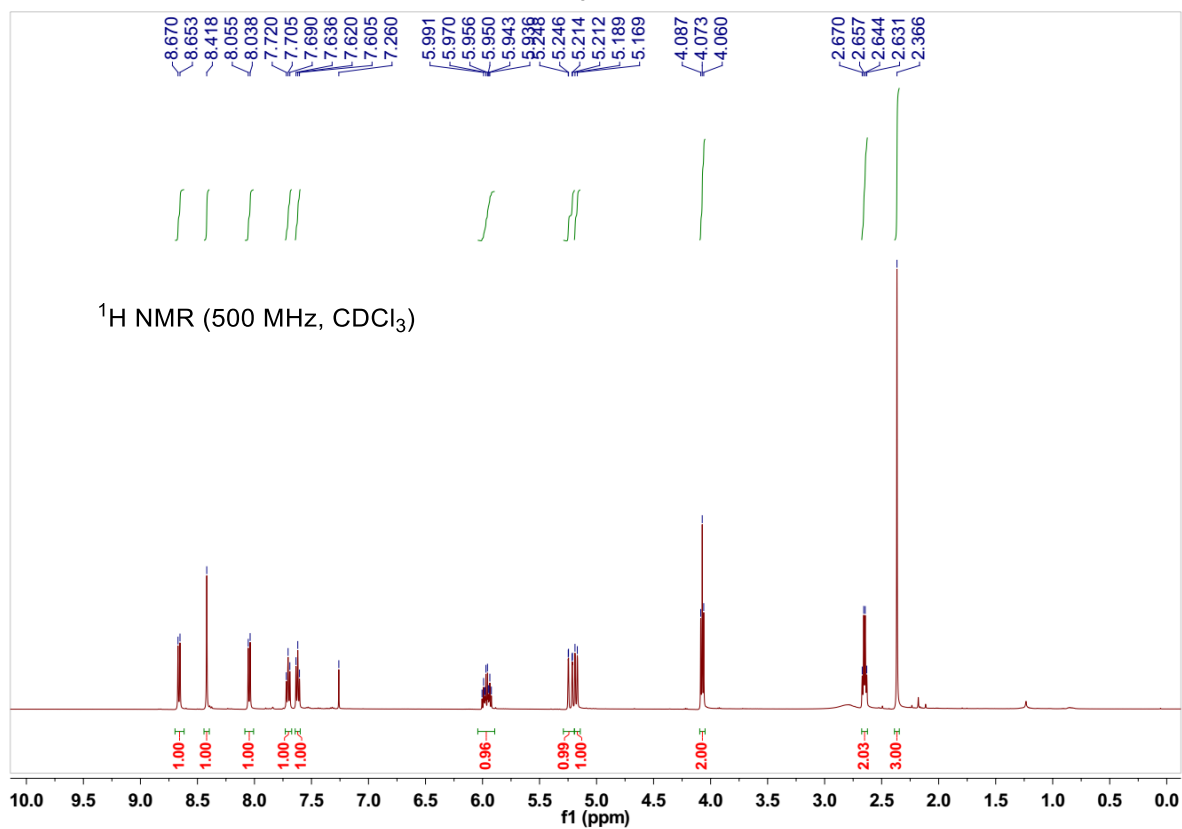

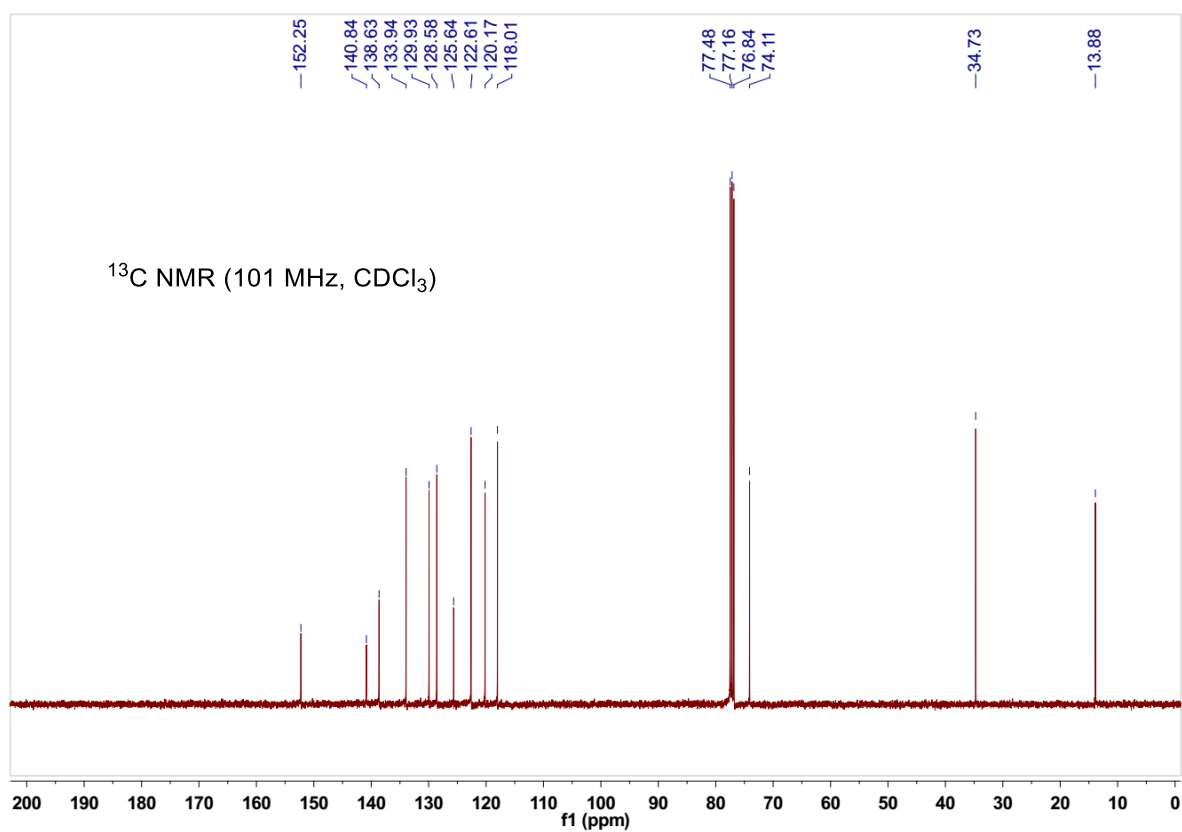

**3-methyl-4-((3-methylbut-3-en-1-yl)oxy)quinoline 1-oxide (Ec):**

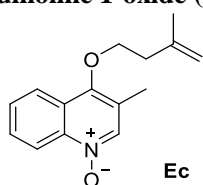

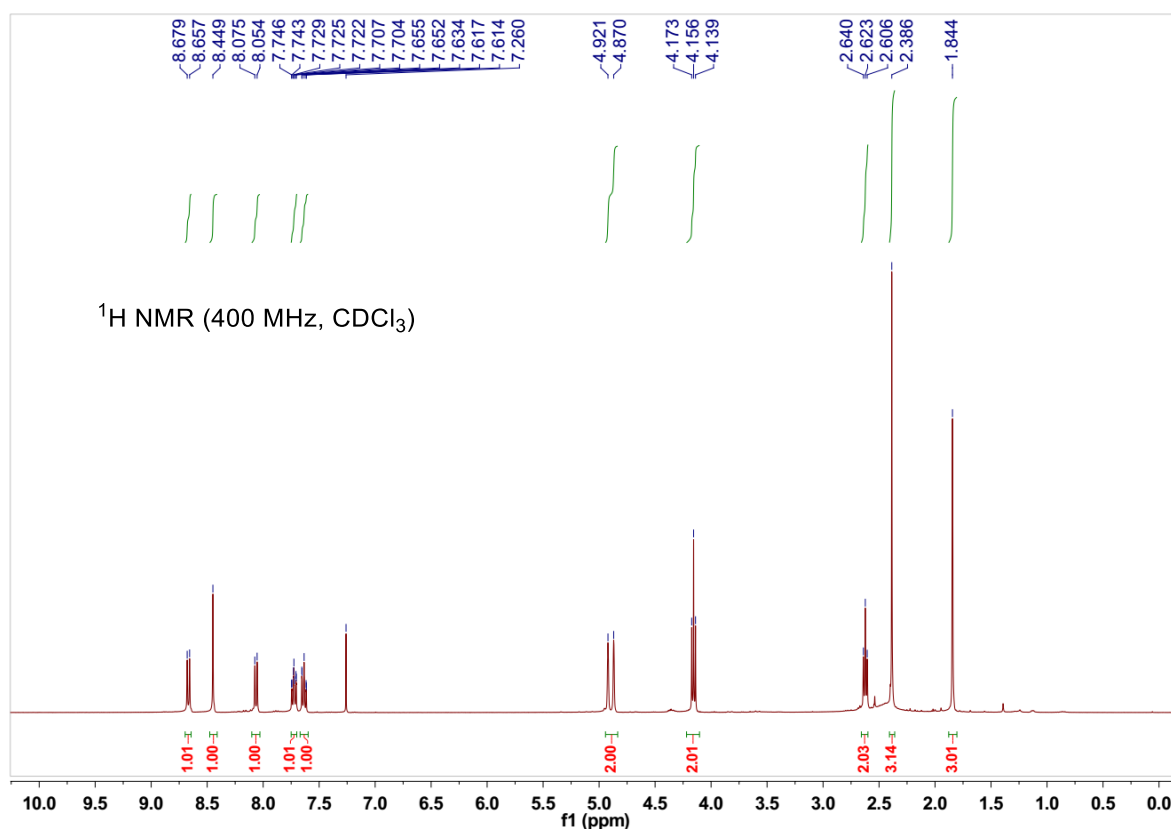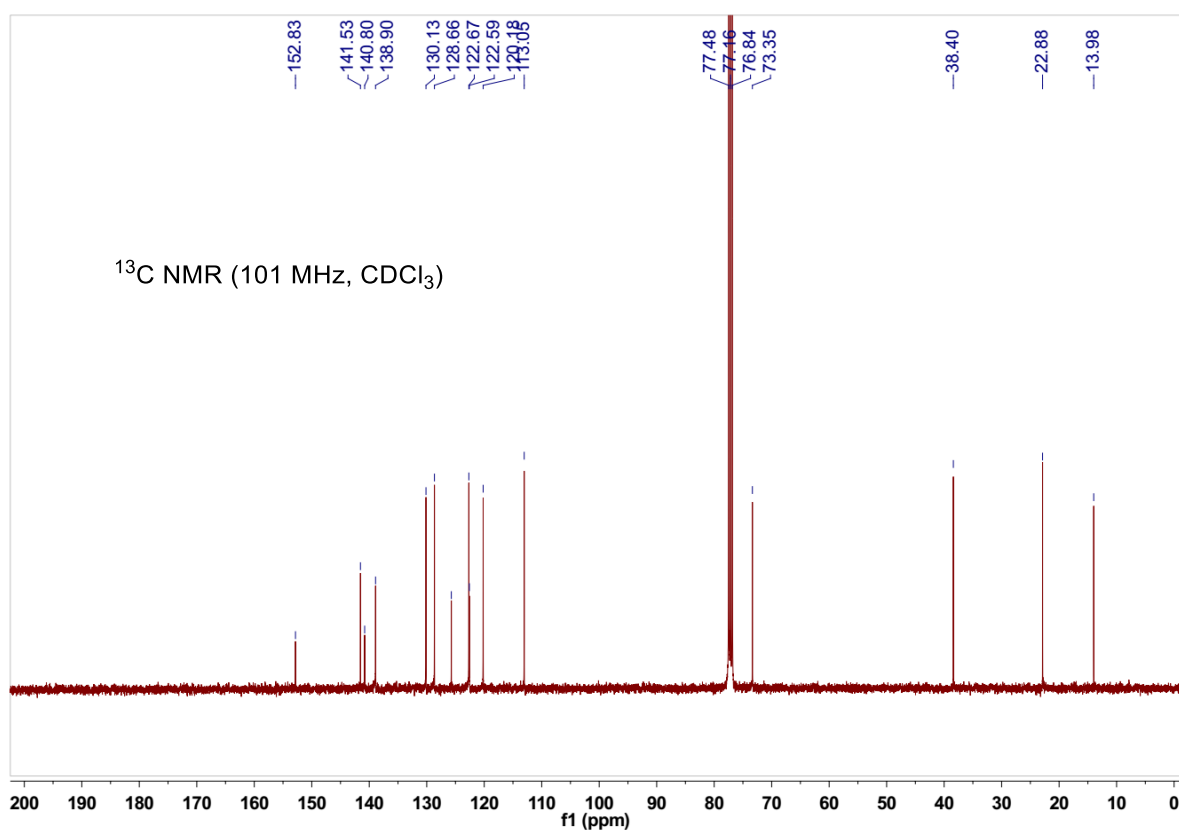

4-(but-3-en-1-yloxy)-3-methylquinolin-2(1H)-one (**5b**):

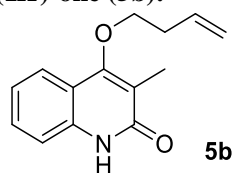

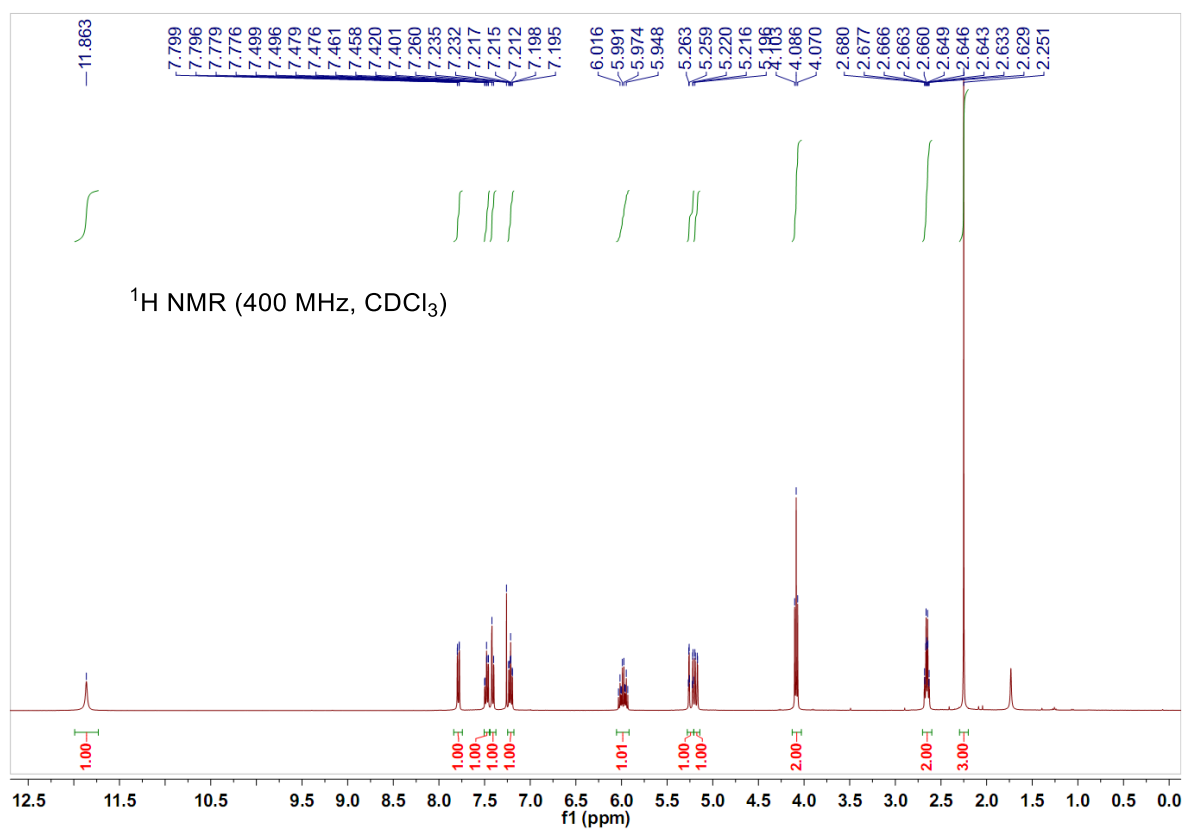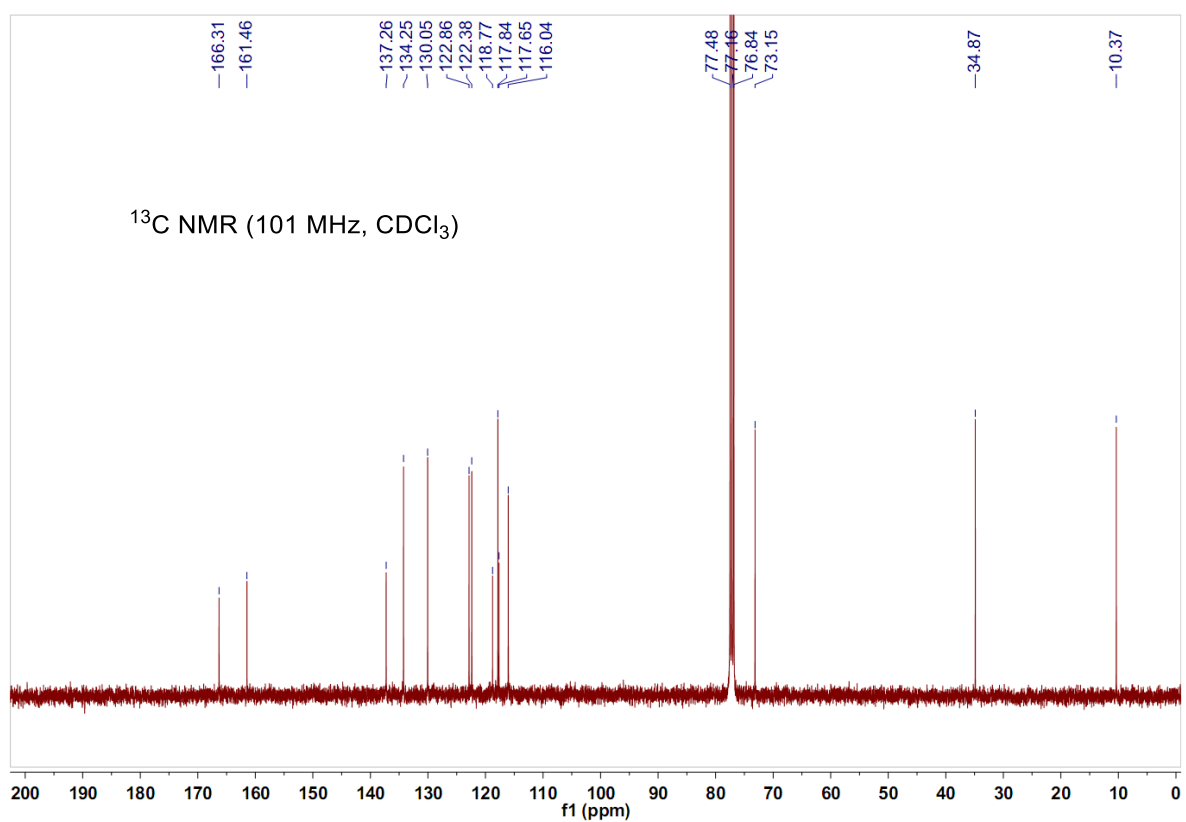

**3-methyl-4-((3-methylbut-3-en-1-yl)oxy)quinolin-2(1H)-one (5c):**



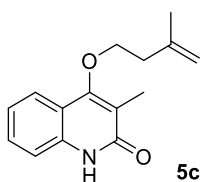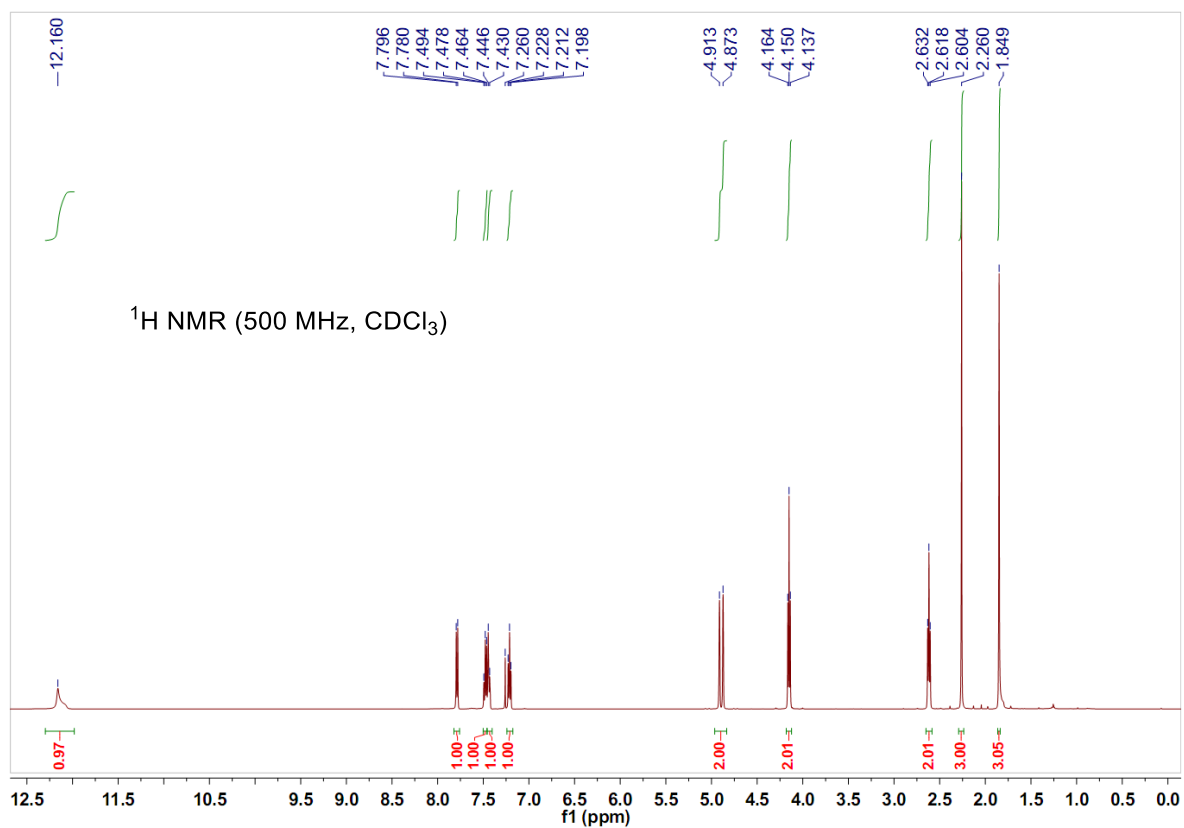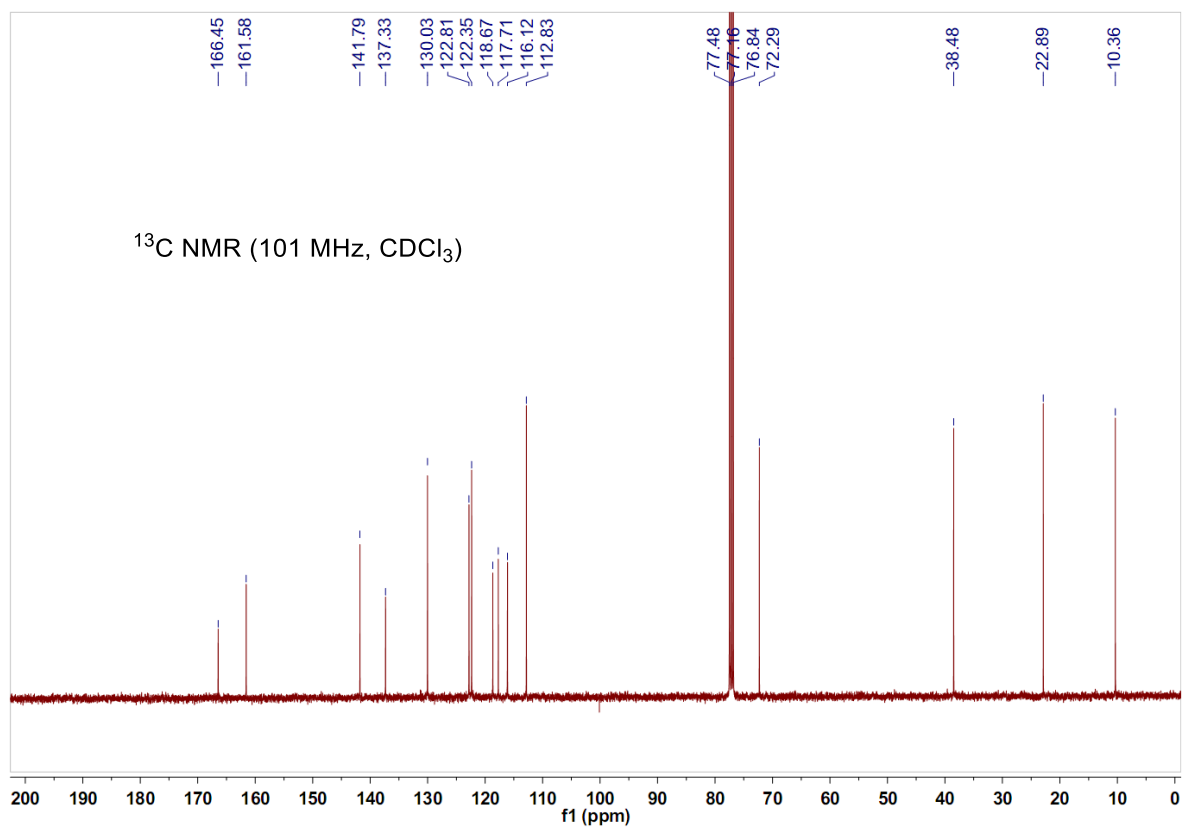

**3-methyl-4-((4-methylpent-3-en-1-yl)oxy)quinolin-2(1H)-one (5d):**

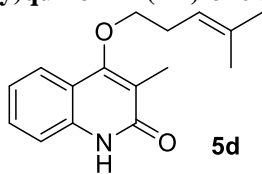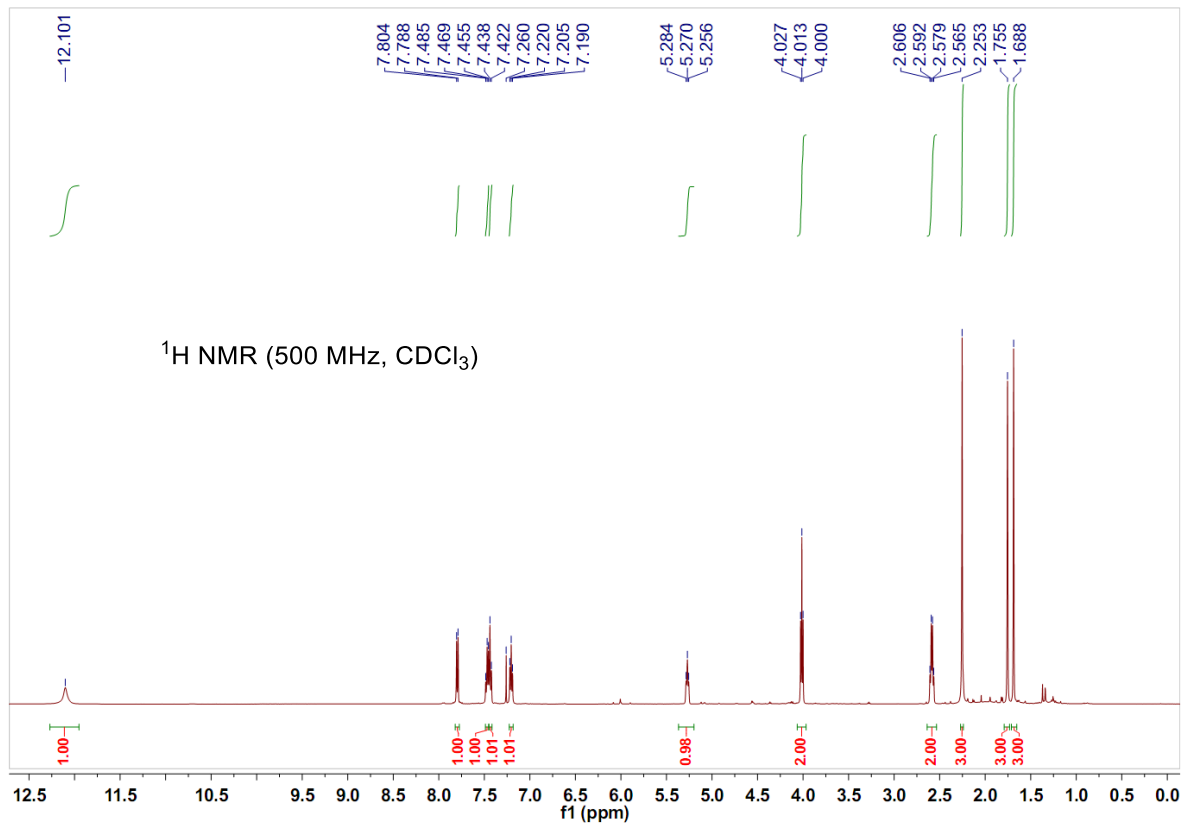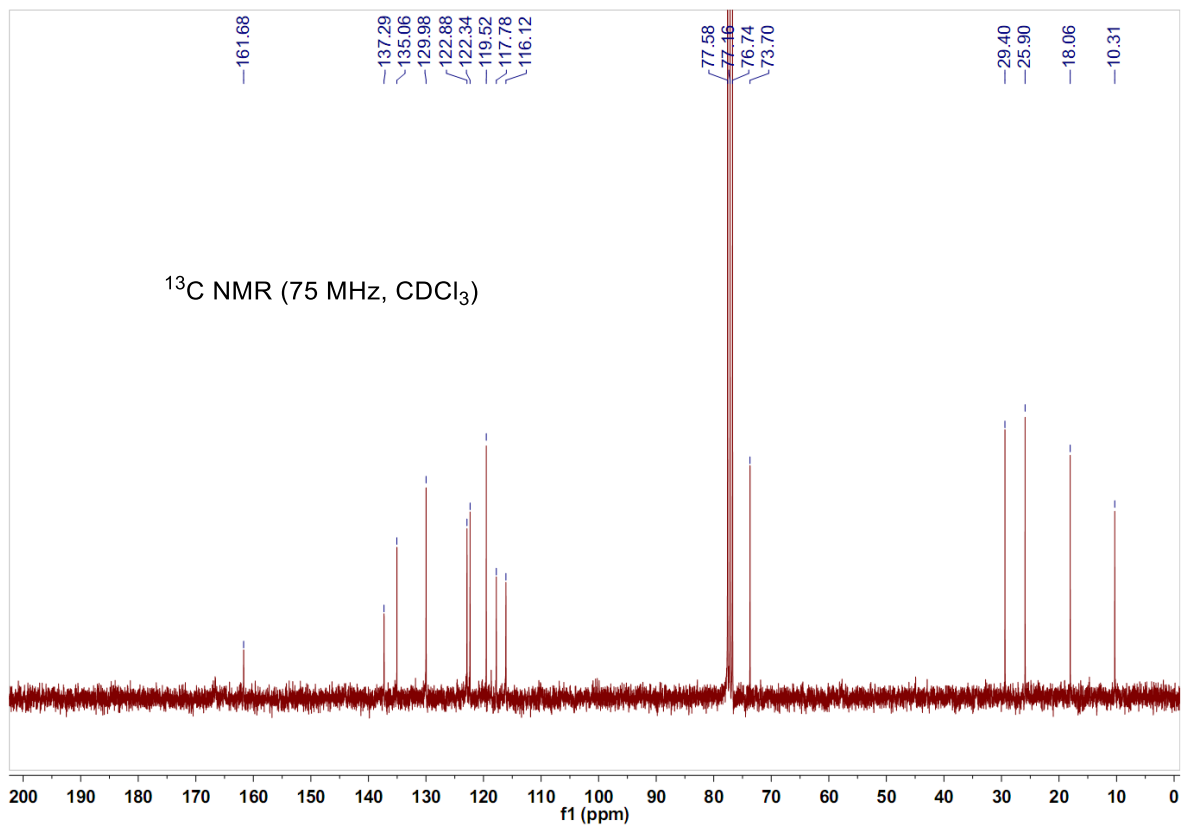

**4-(2-(cyclopent-1-en-1-yl)ethoxy)-3-methylquinolin-2(1H)-one (5e):**

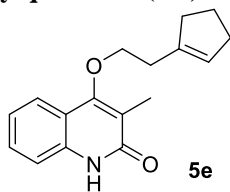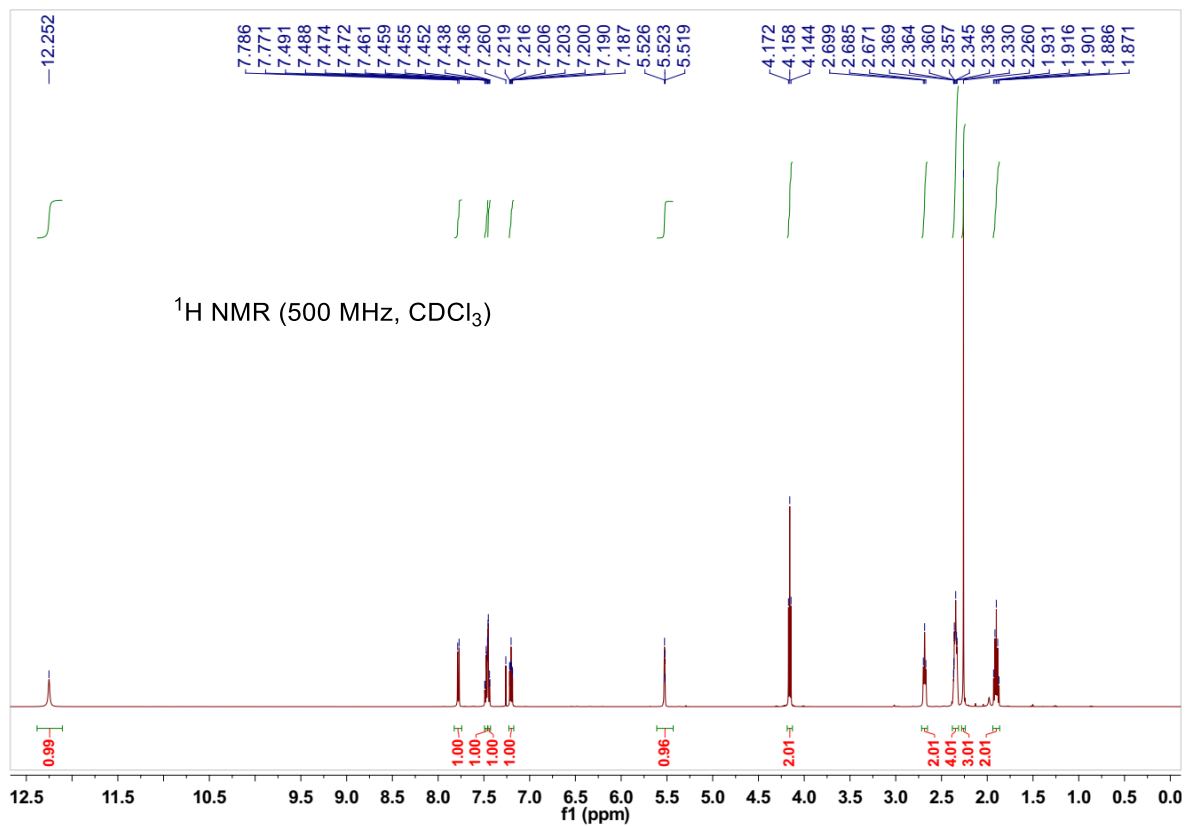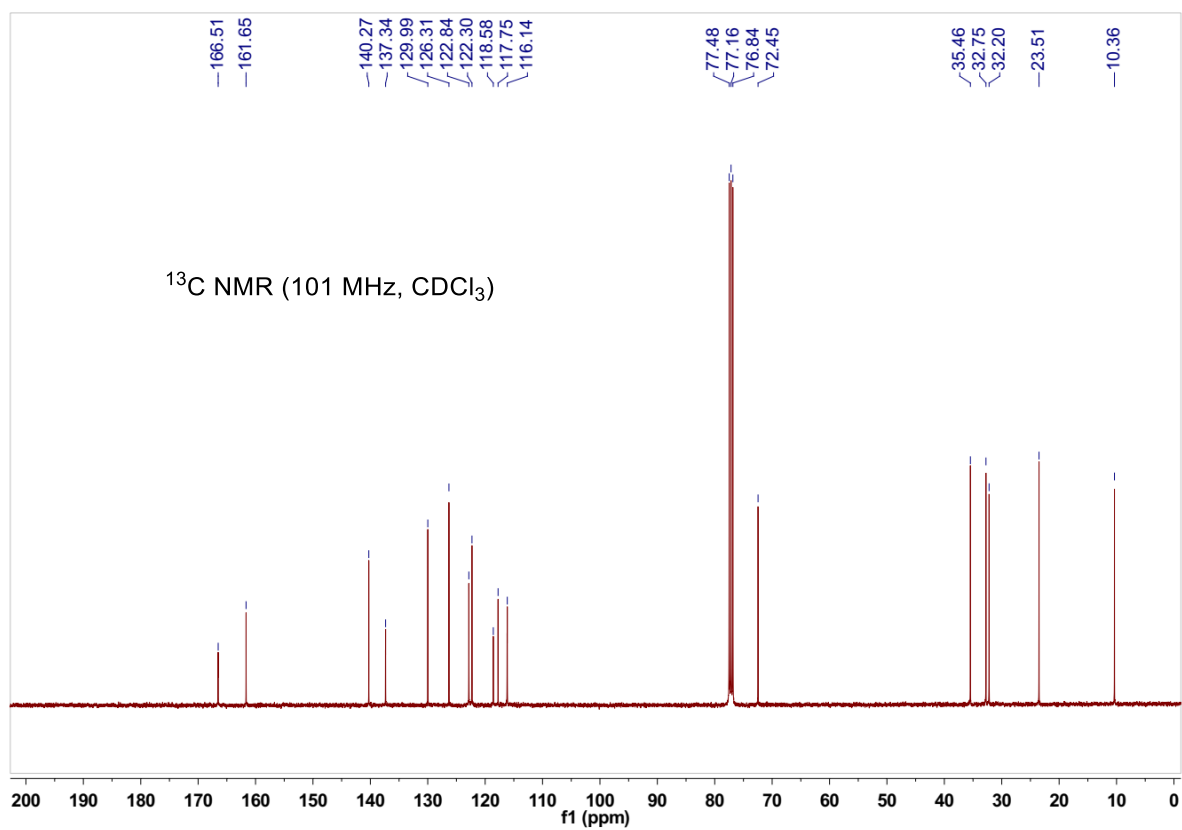

**4-(2-(cyclohex-1-en-1-yl)ethoxy)-3-methylquinolin-2(1H)-one (5f):**

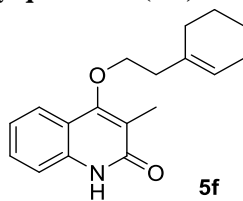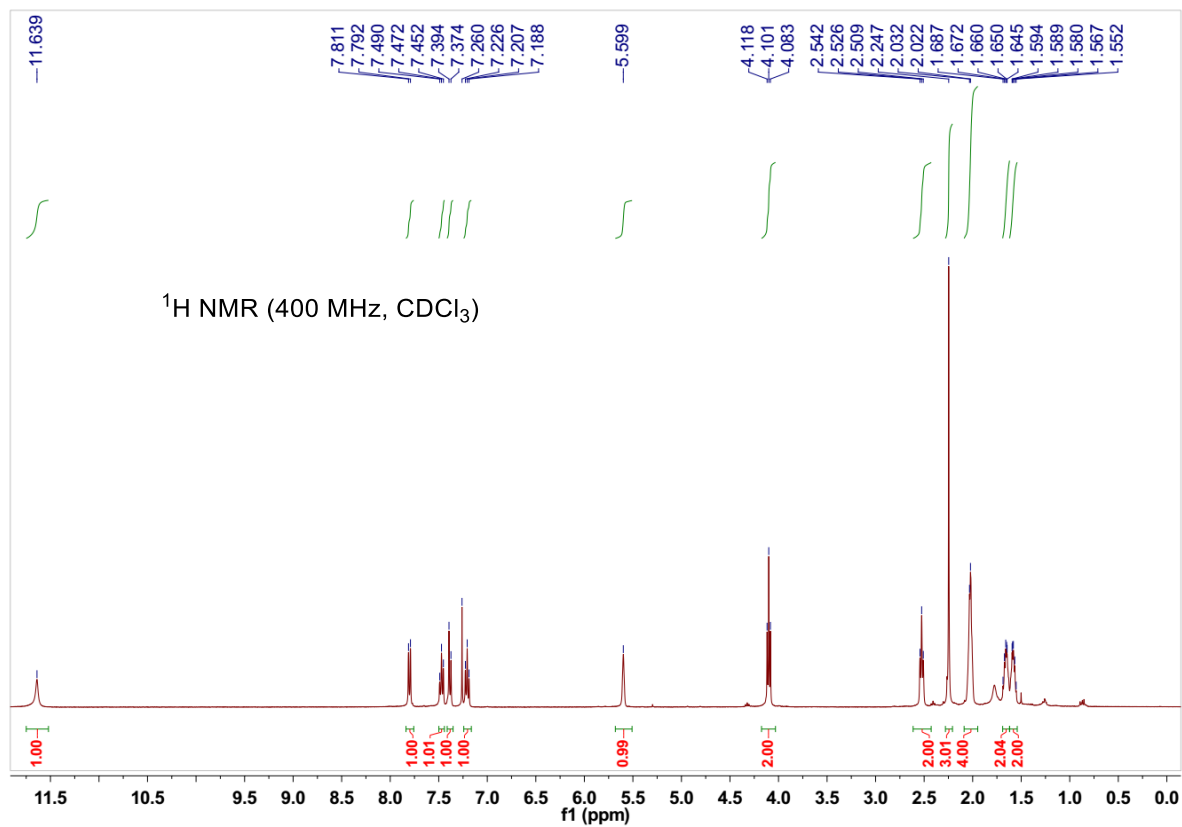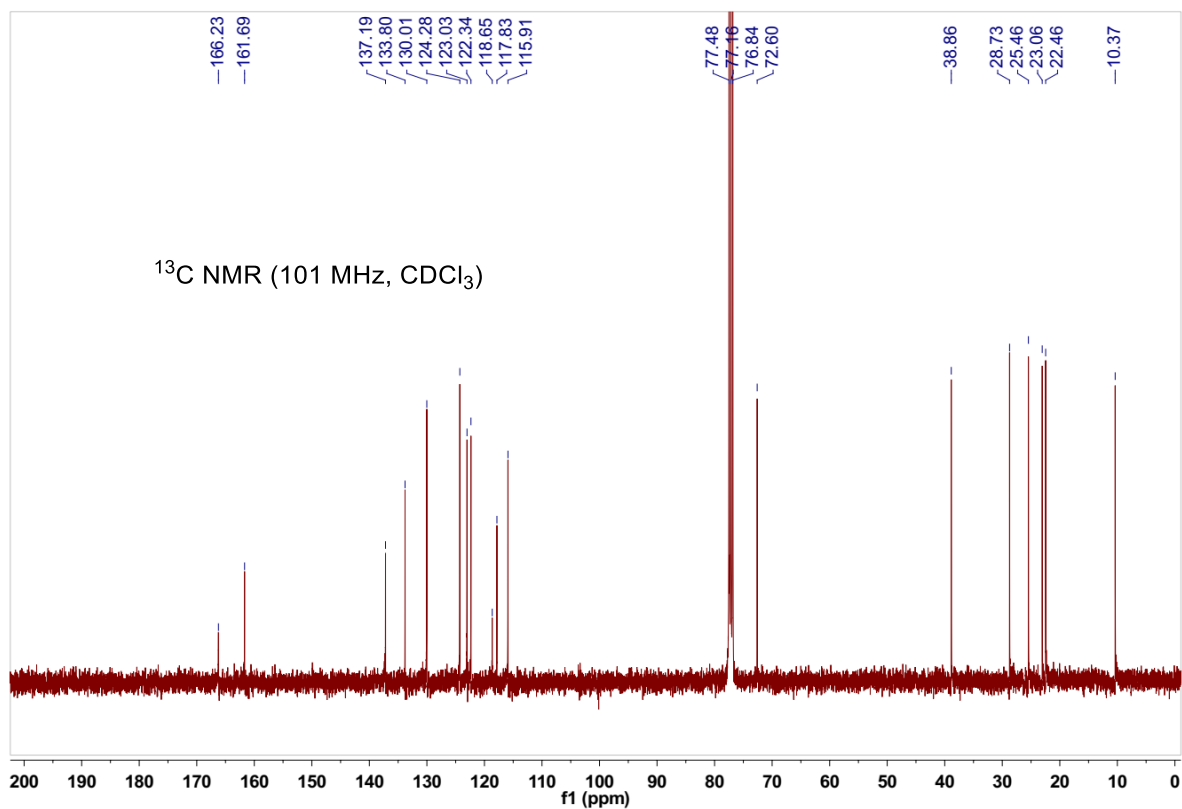

**6-methoxy-3-methyl-4-((3-methylbut-3-en-1-yl)oxy)quinolin-2(1H)-one (5g):**

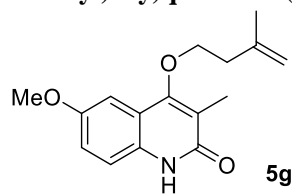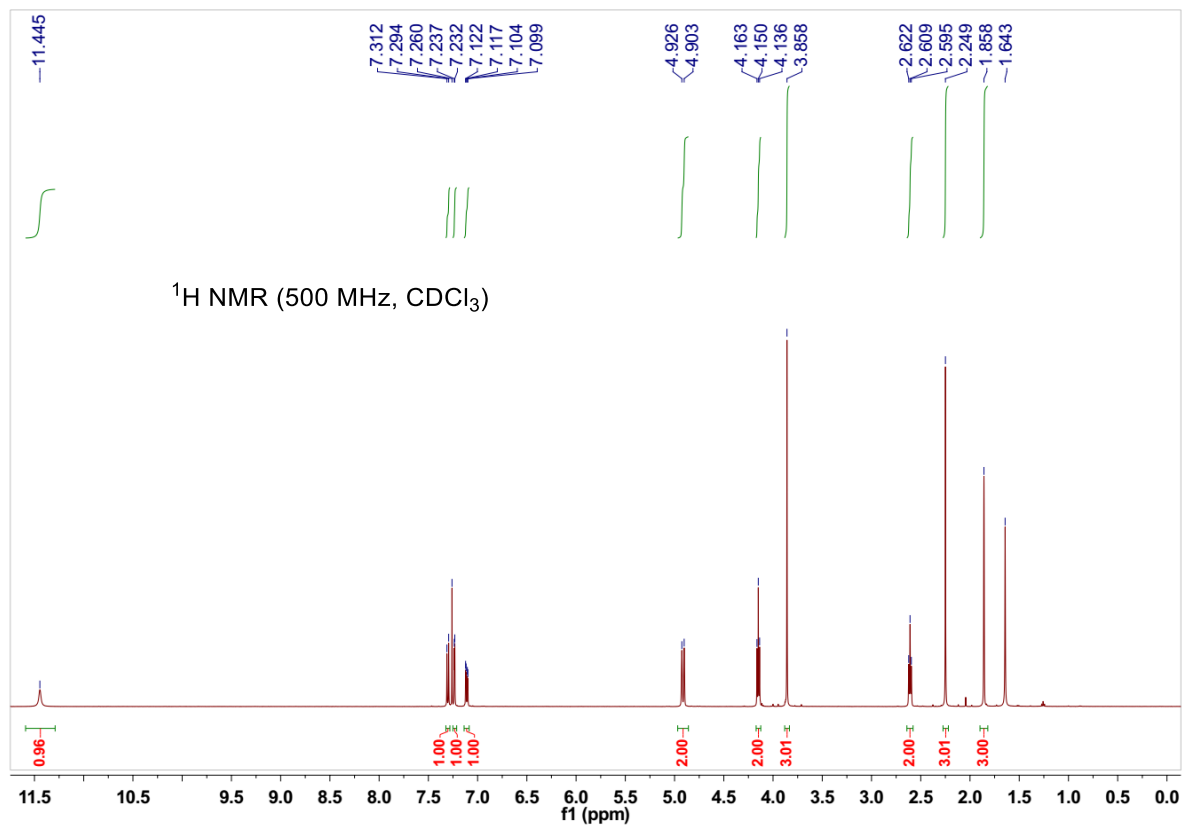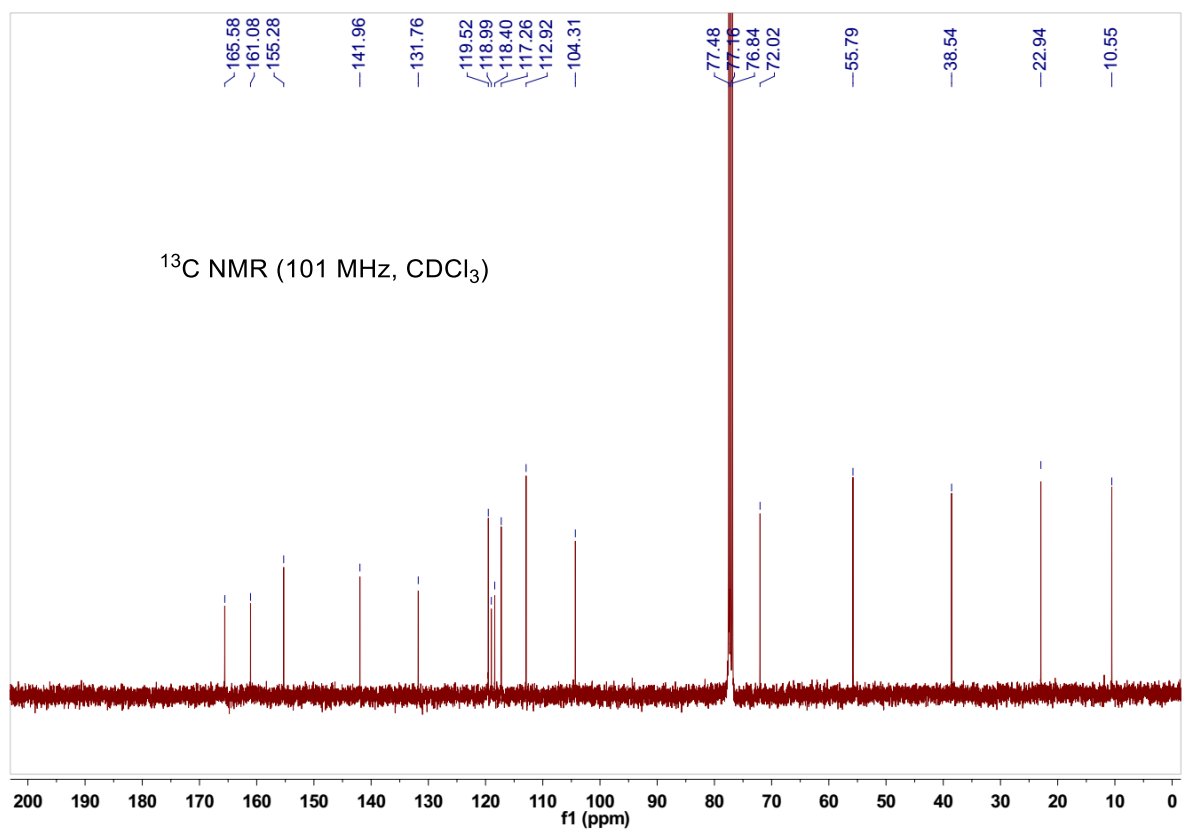

**3,6-dimethyl-4-((3-methylbut-3-en-1-yl)oxy)quinolin-2(1H)-one (5h):**

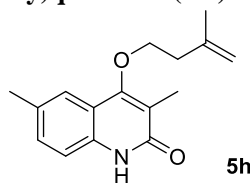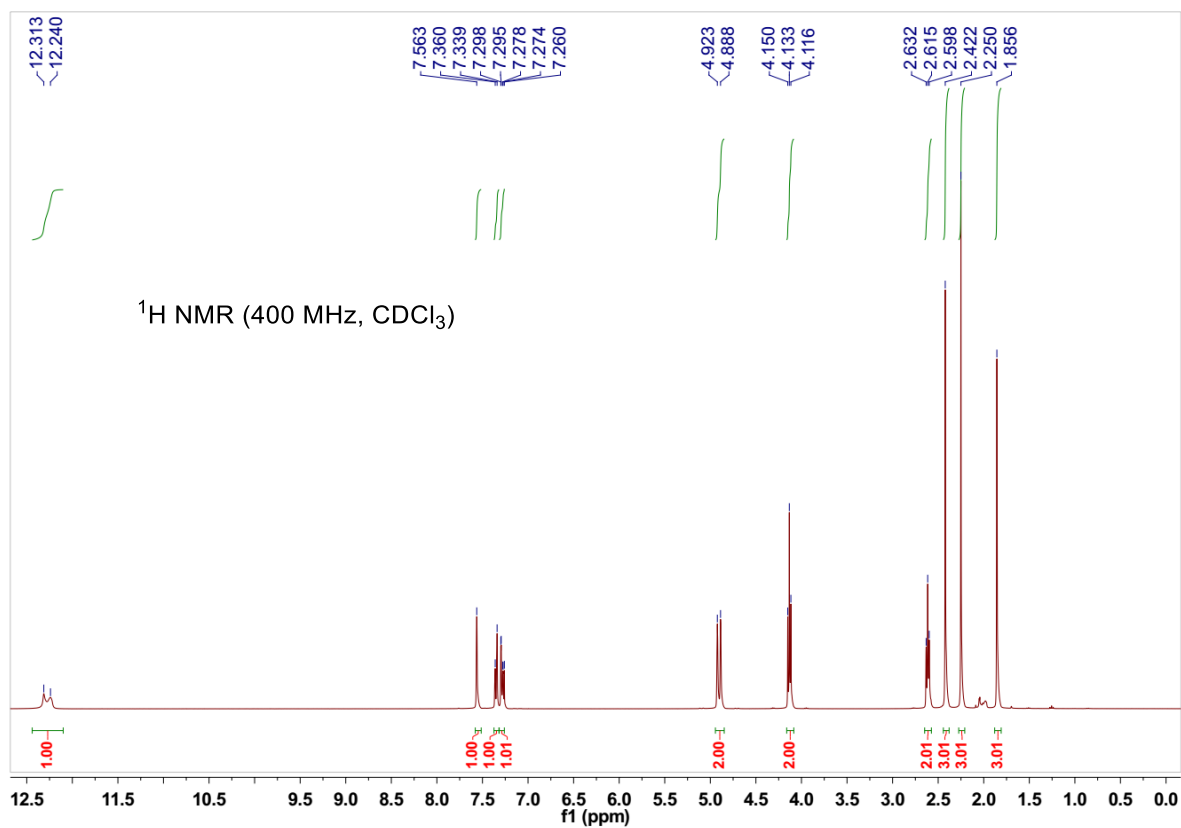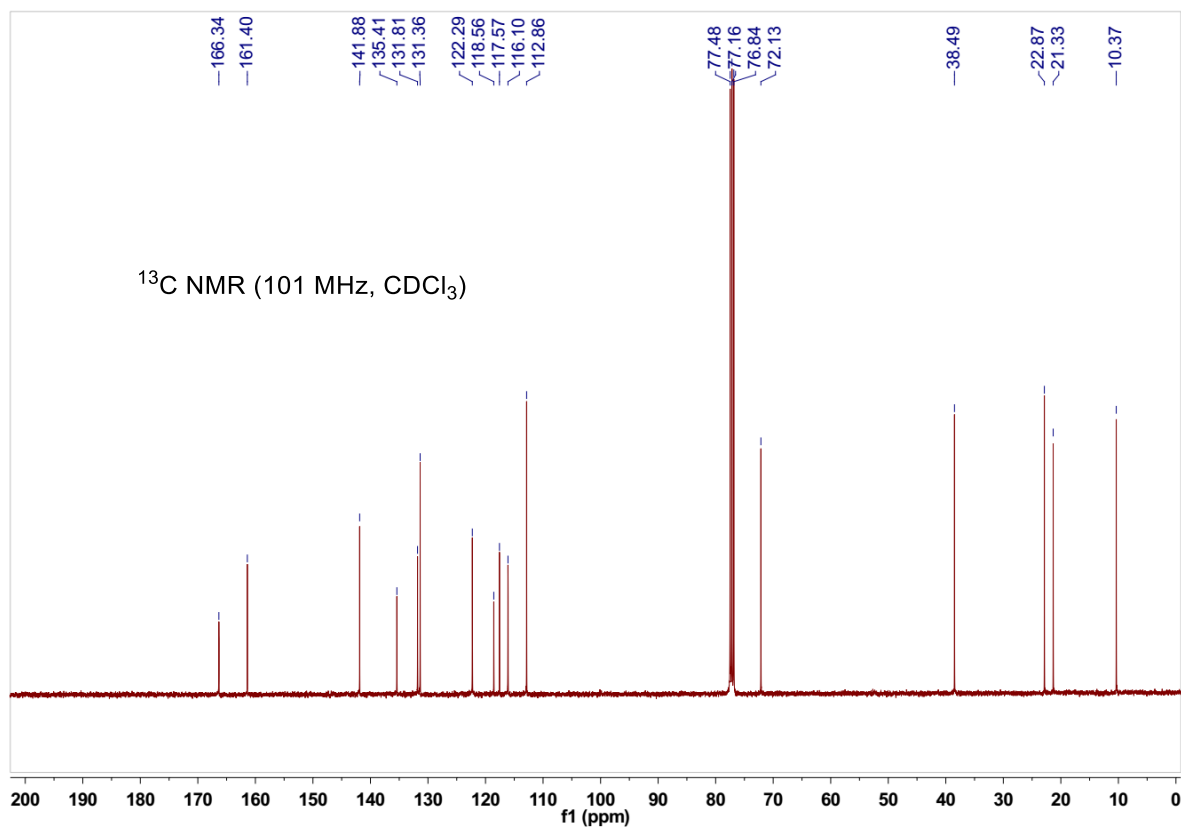

**6-fluoro-3-methyl-4-((3-methylbut-3-en-1-yl)oxy)quinolin-2(1H)-one (5i):**

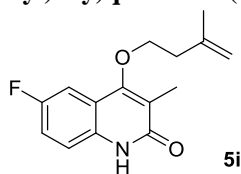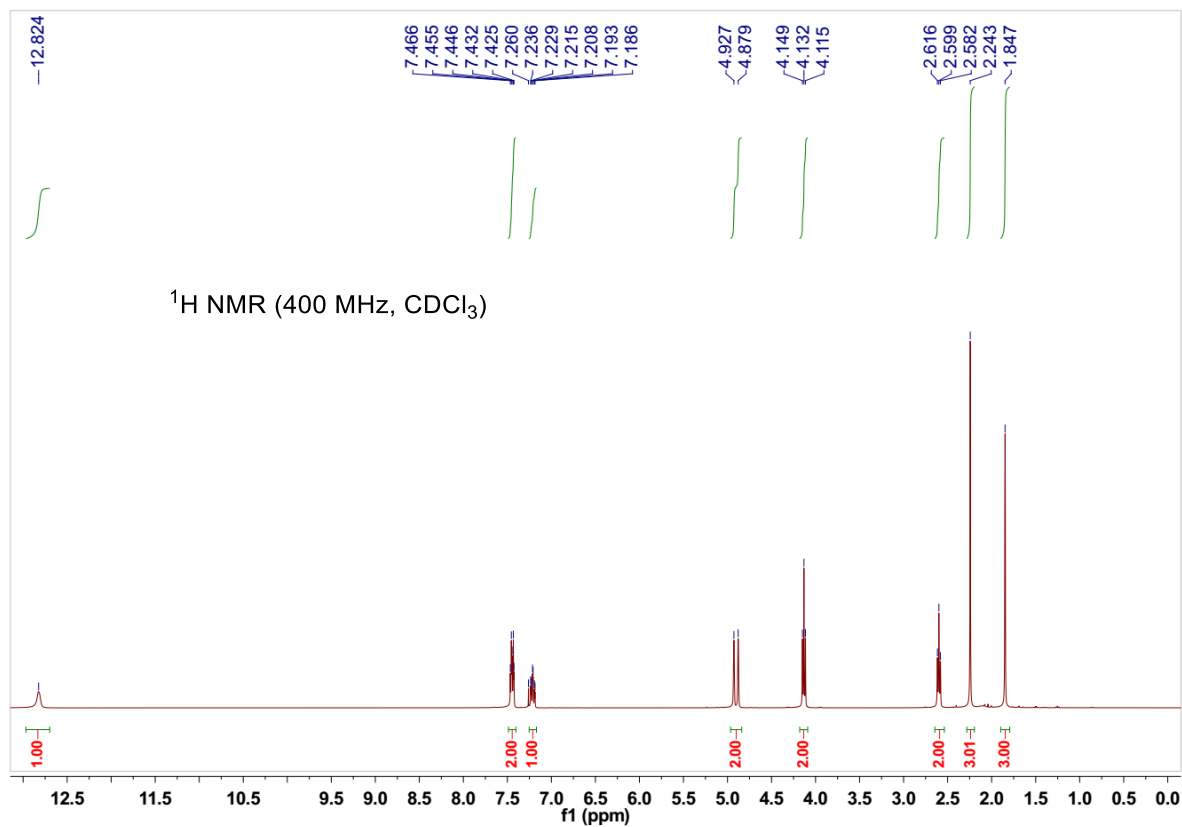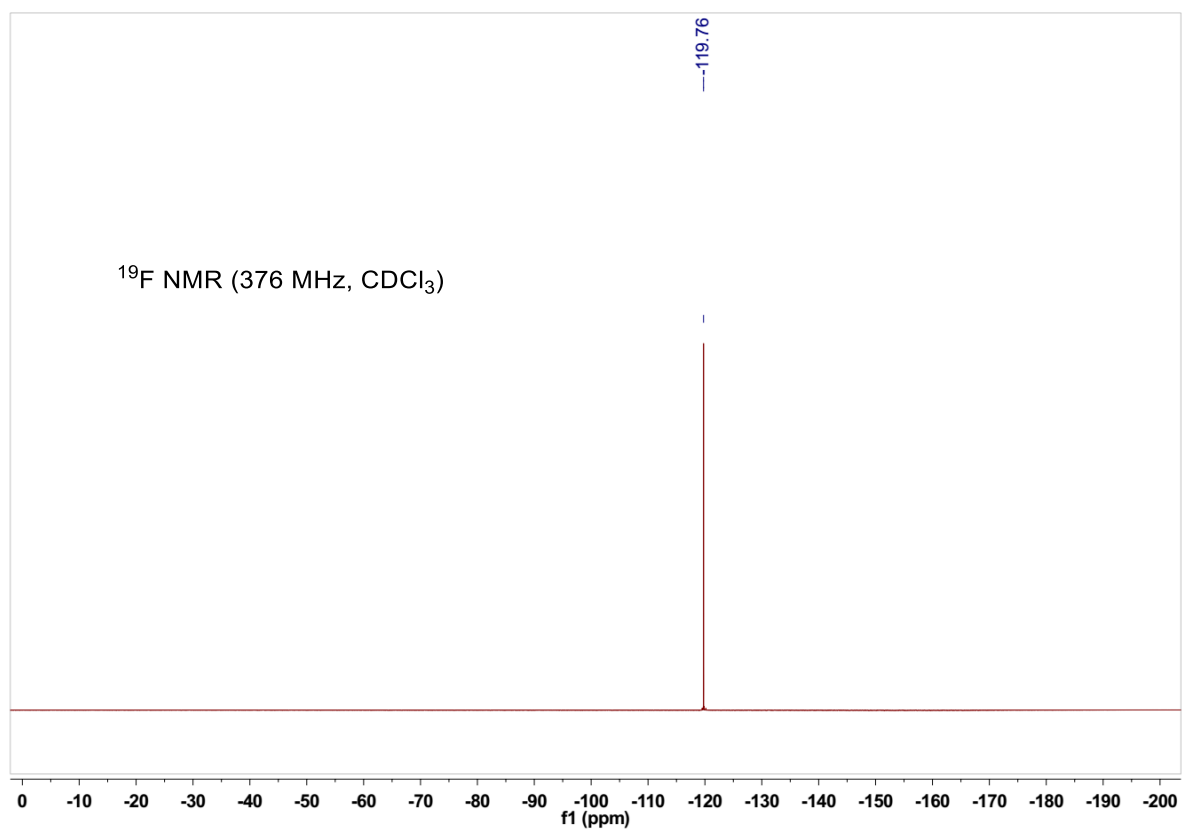

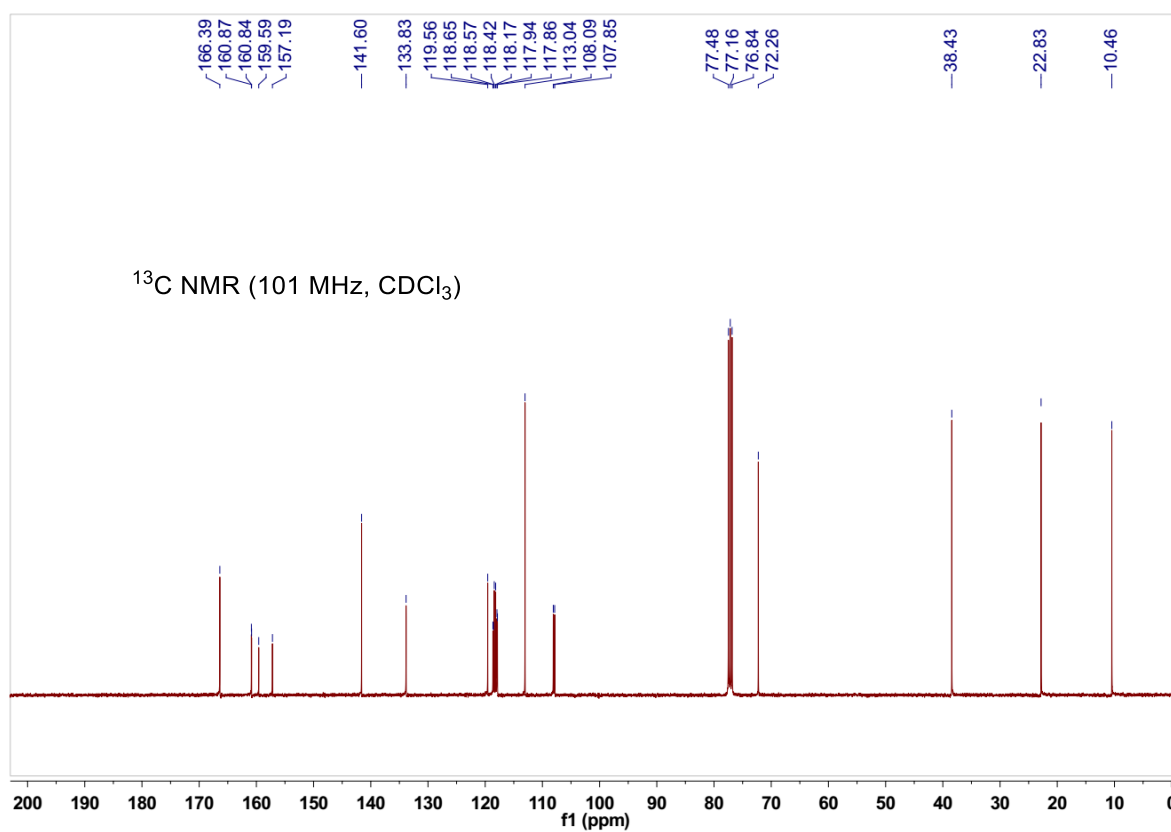



**6-chloro-3-methyl-4-((3-methylbut-3-en-1-yl)oxy)quinolin-2(1H)-one (5j):**

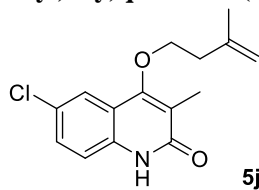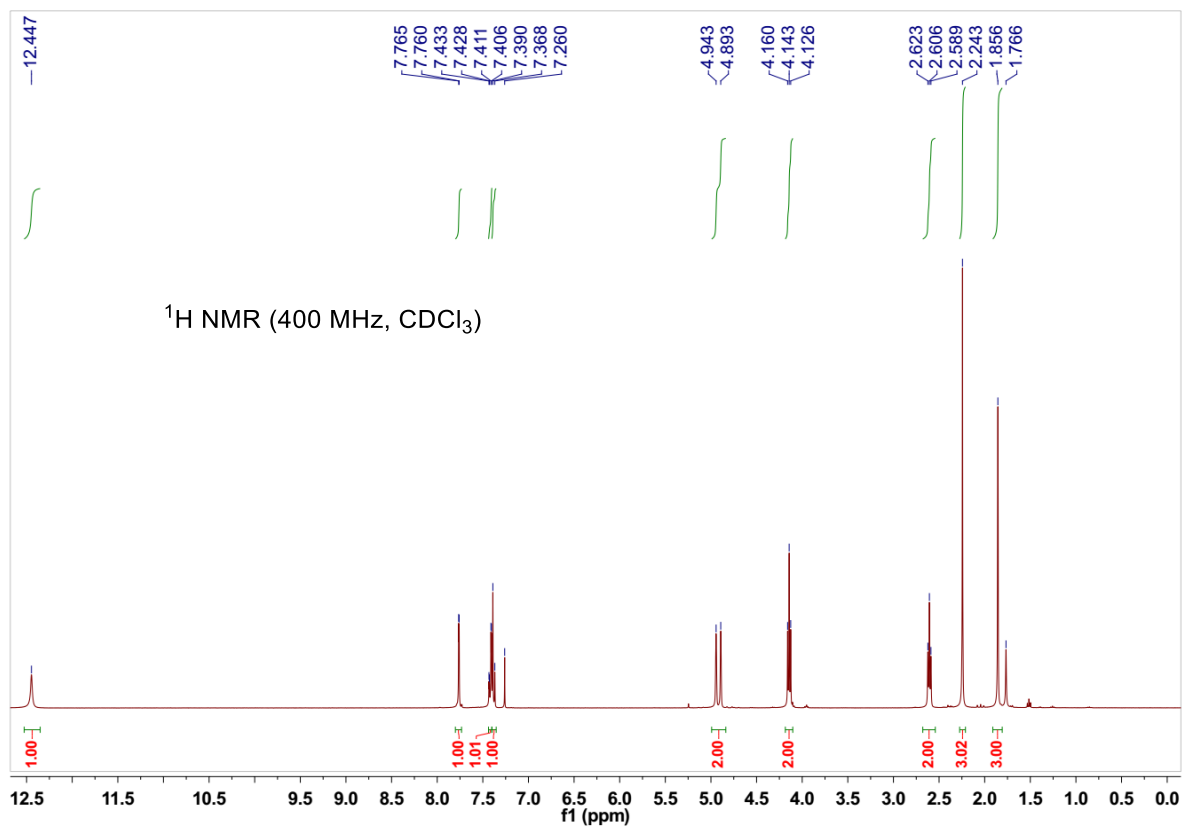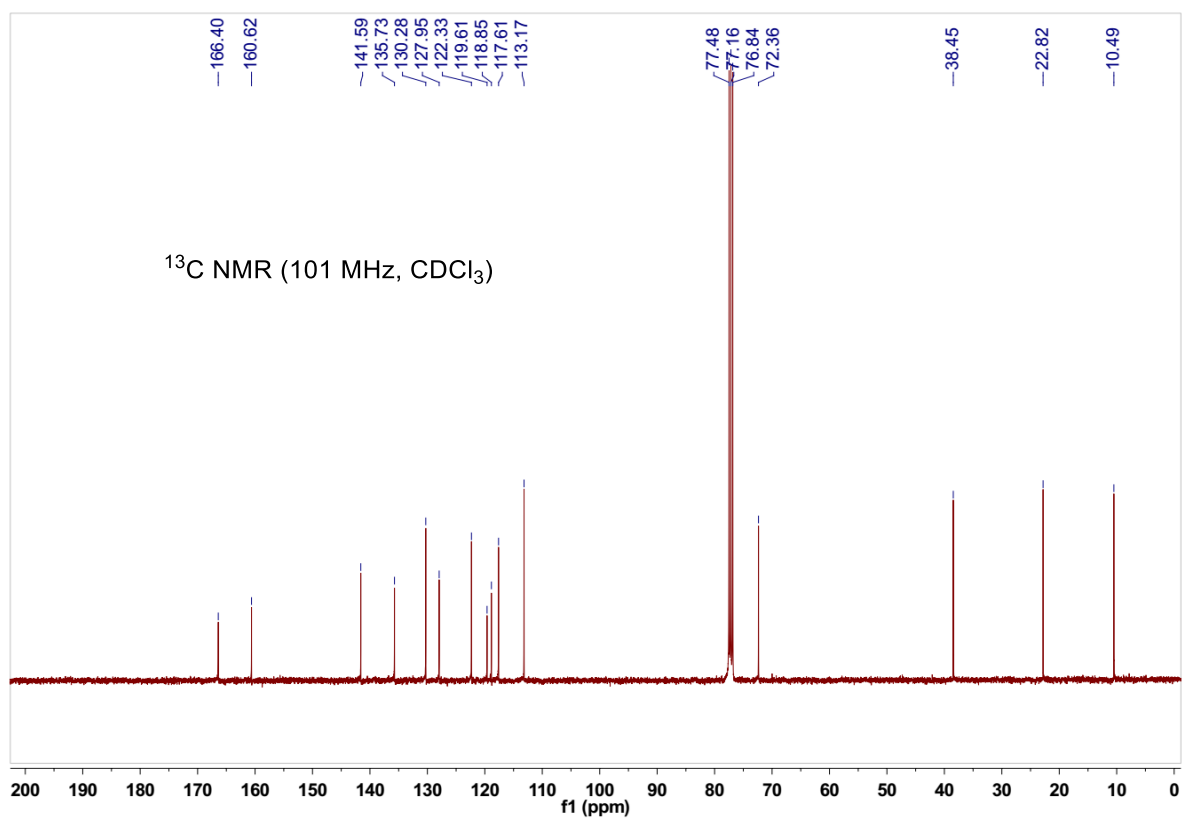

**3-methyl-4-((3-methylbut-3-en-1-yl)oxy)-2-oxo-1,2-dihydroquinoline-6-carbonitrile (5k):**

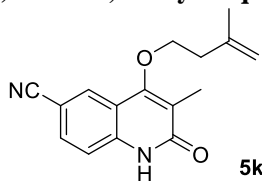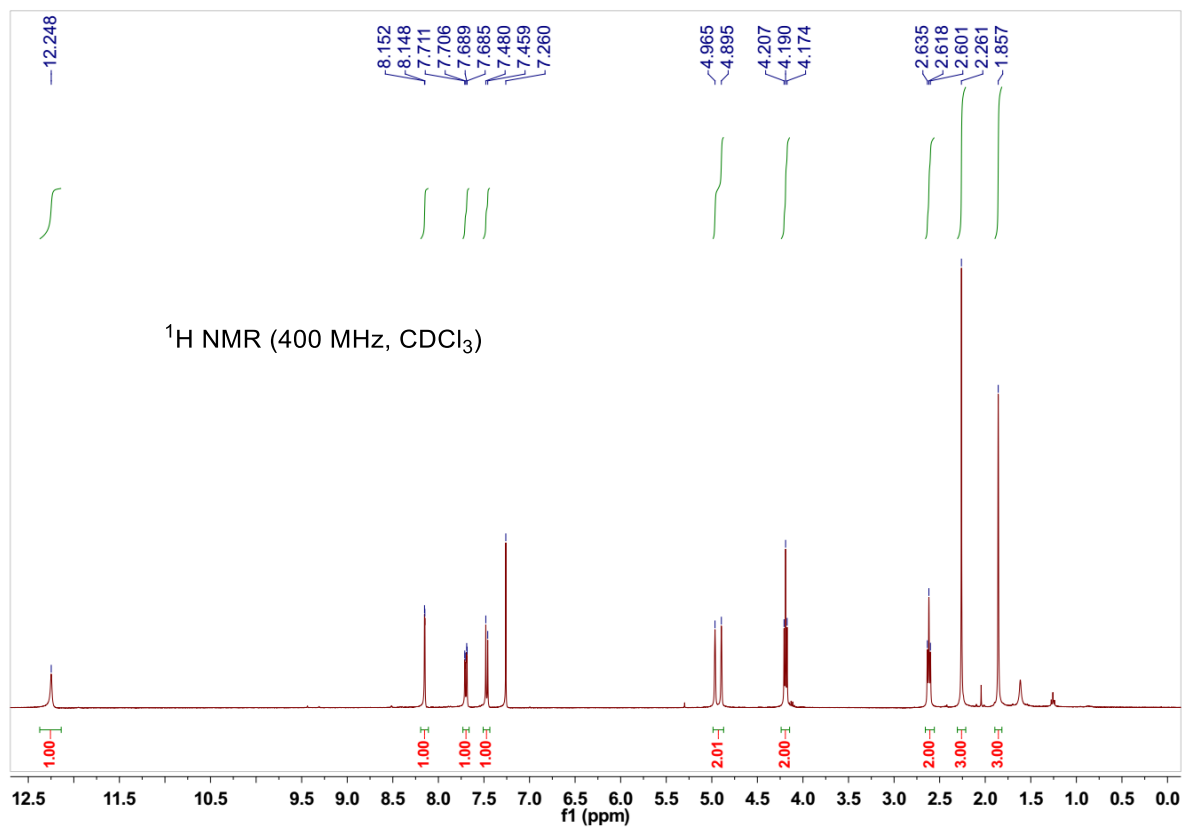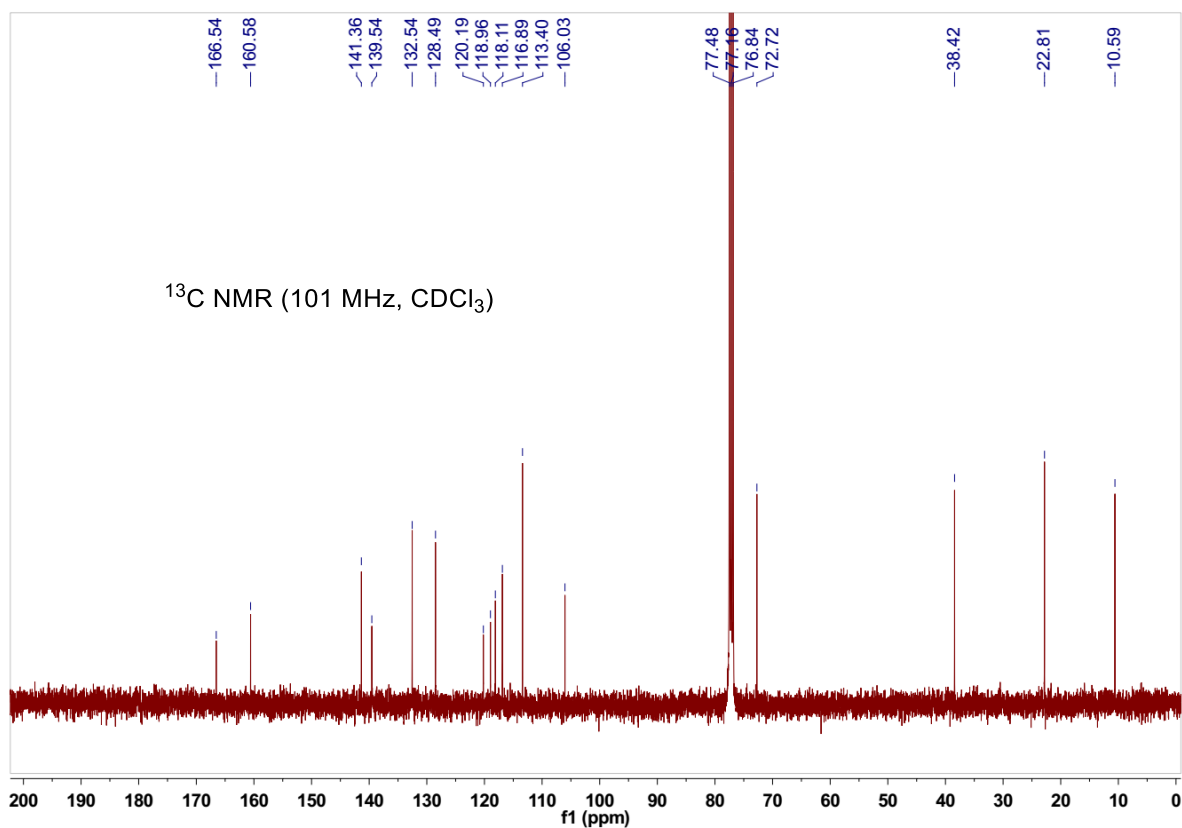

**3,7-dimethyl-4-((3-methylbut-3-en-1-yl)oxy)quinolin-2(1H)-one (5I):**

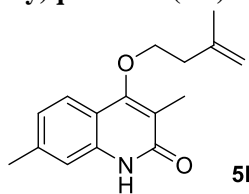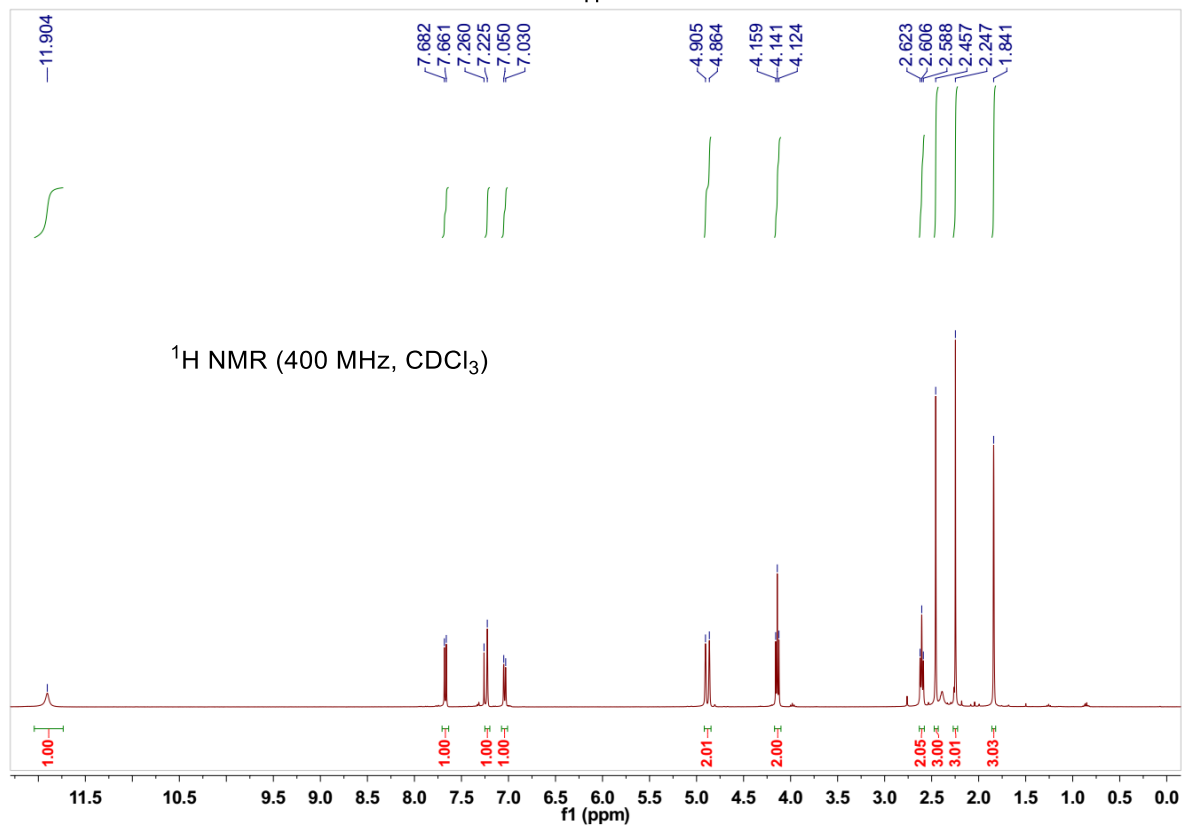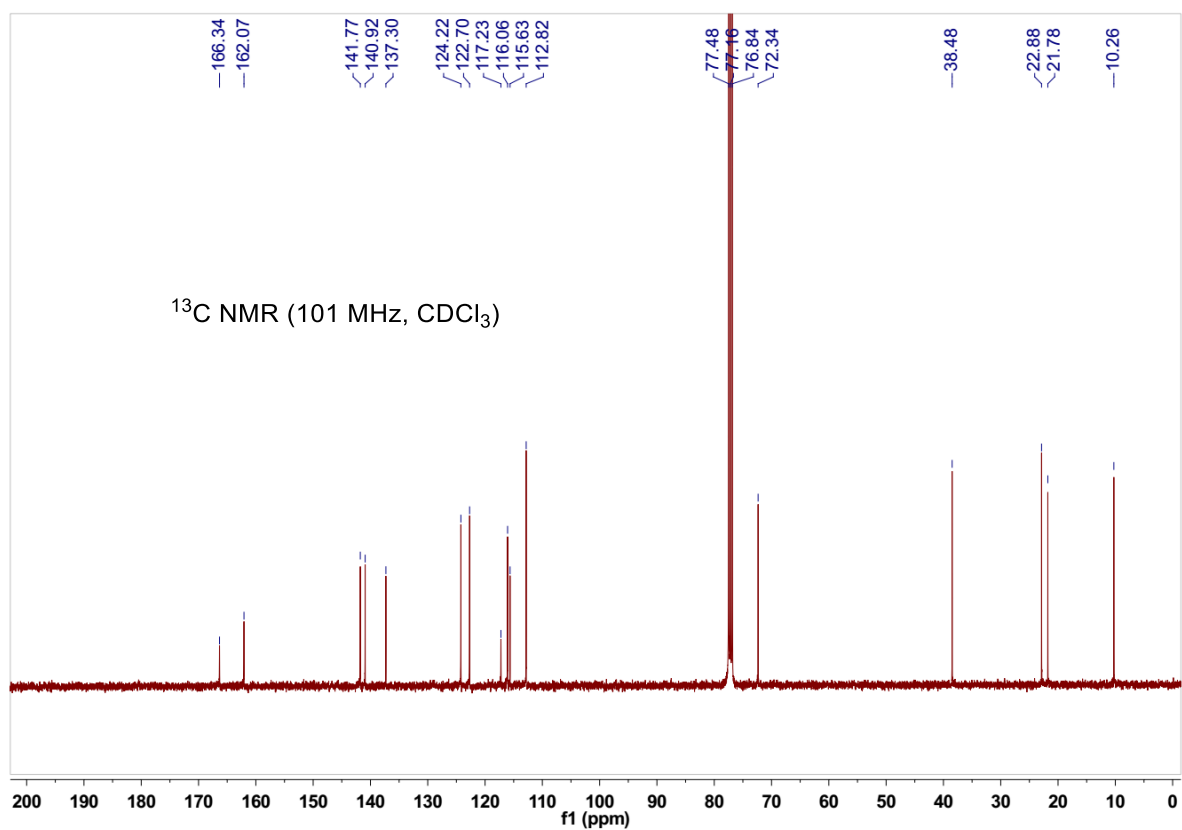

**3-ethyl-4-((3-methylbut-3-en-1-yl)oxy)quinolin-2(1H)-one (5m):**

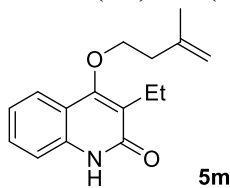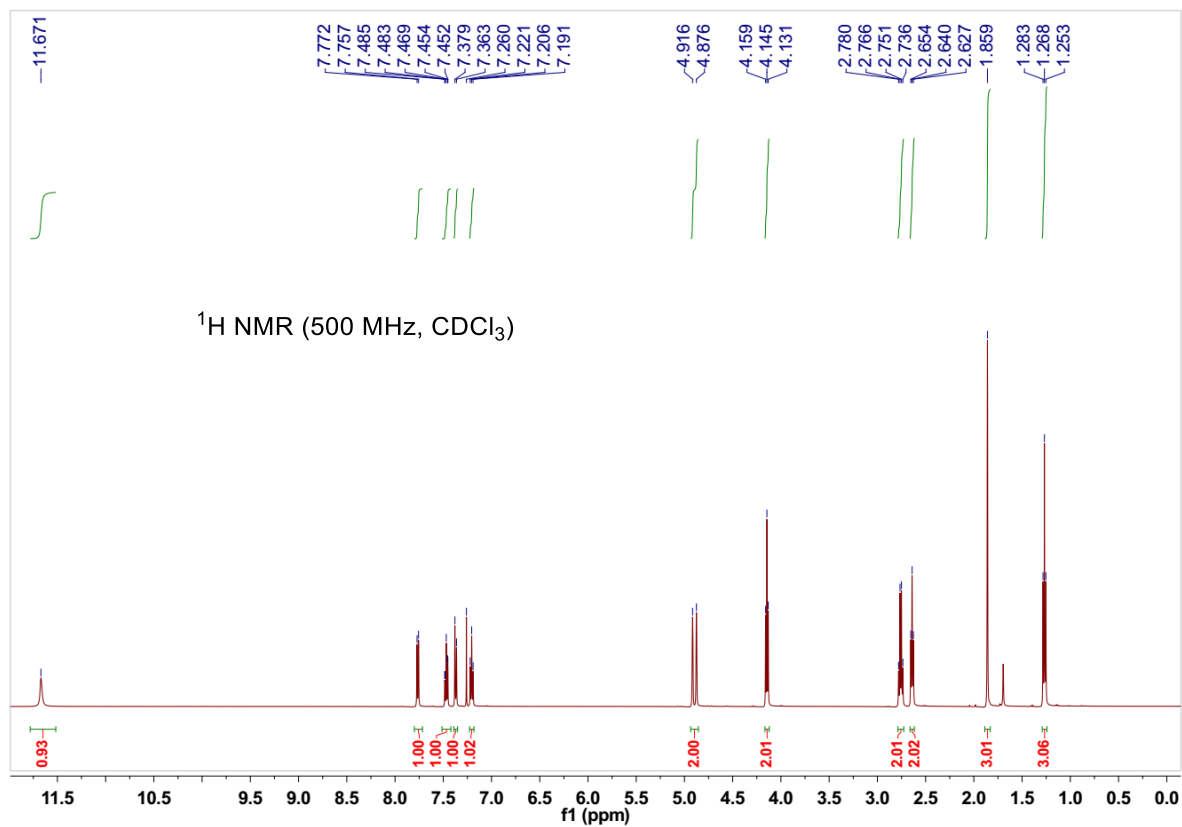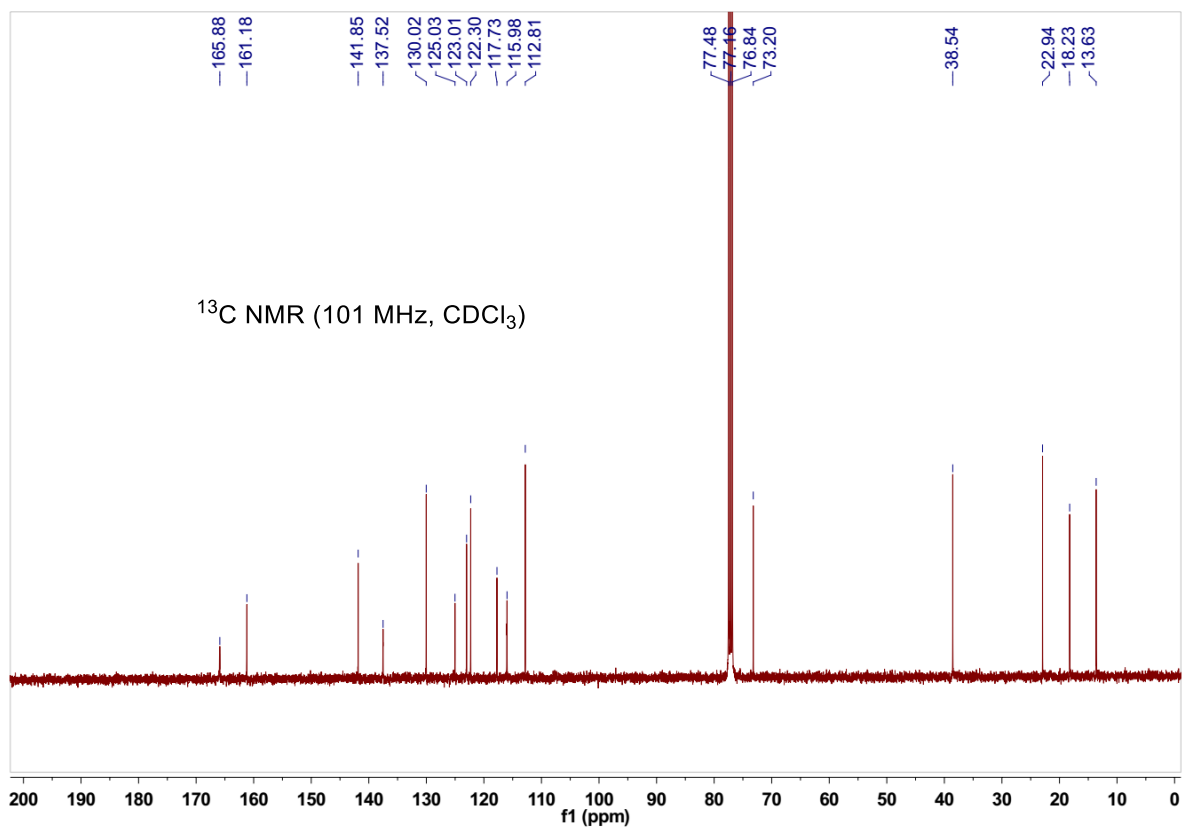

**7-fluoro-3-methyl-4-((3-methylbut-3-en-1-yl)oxy)quinolin-2(1H)-one (5n):**

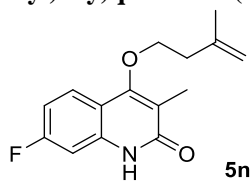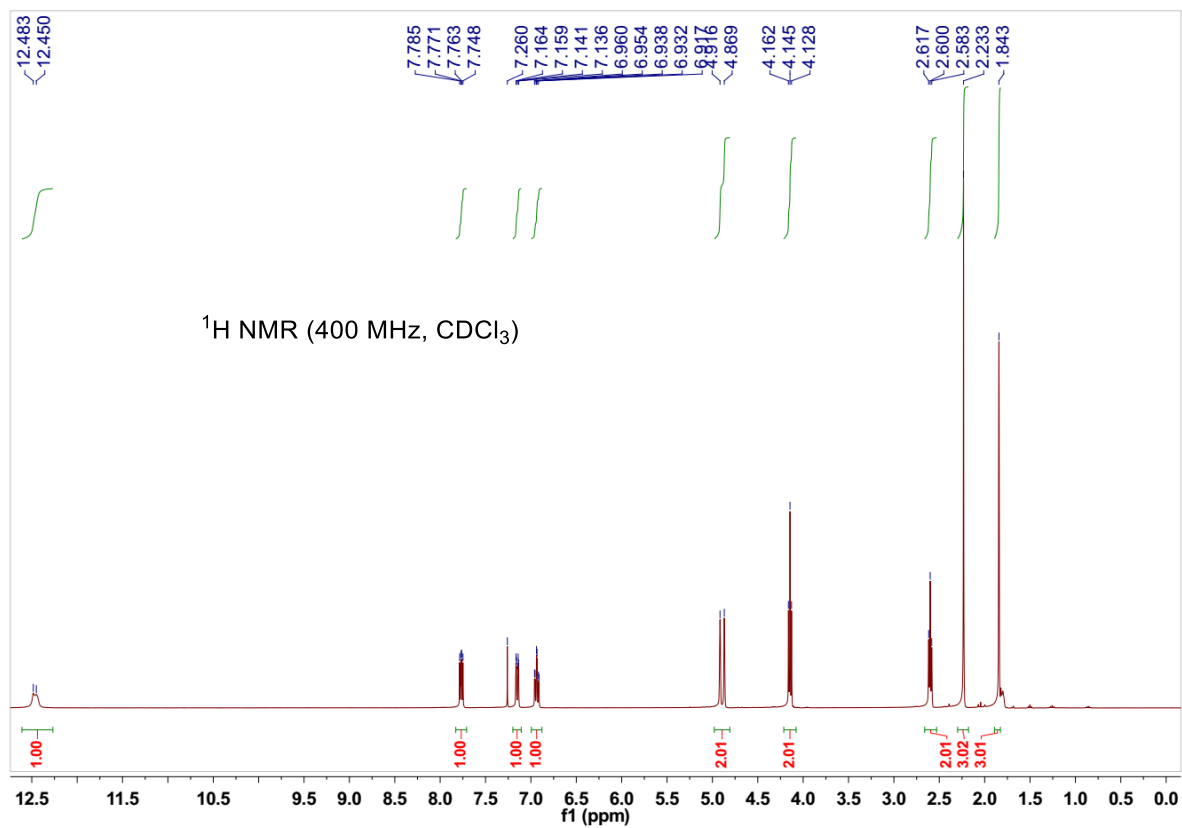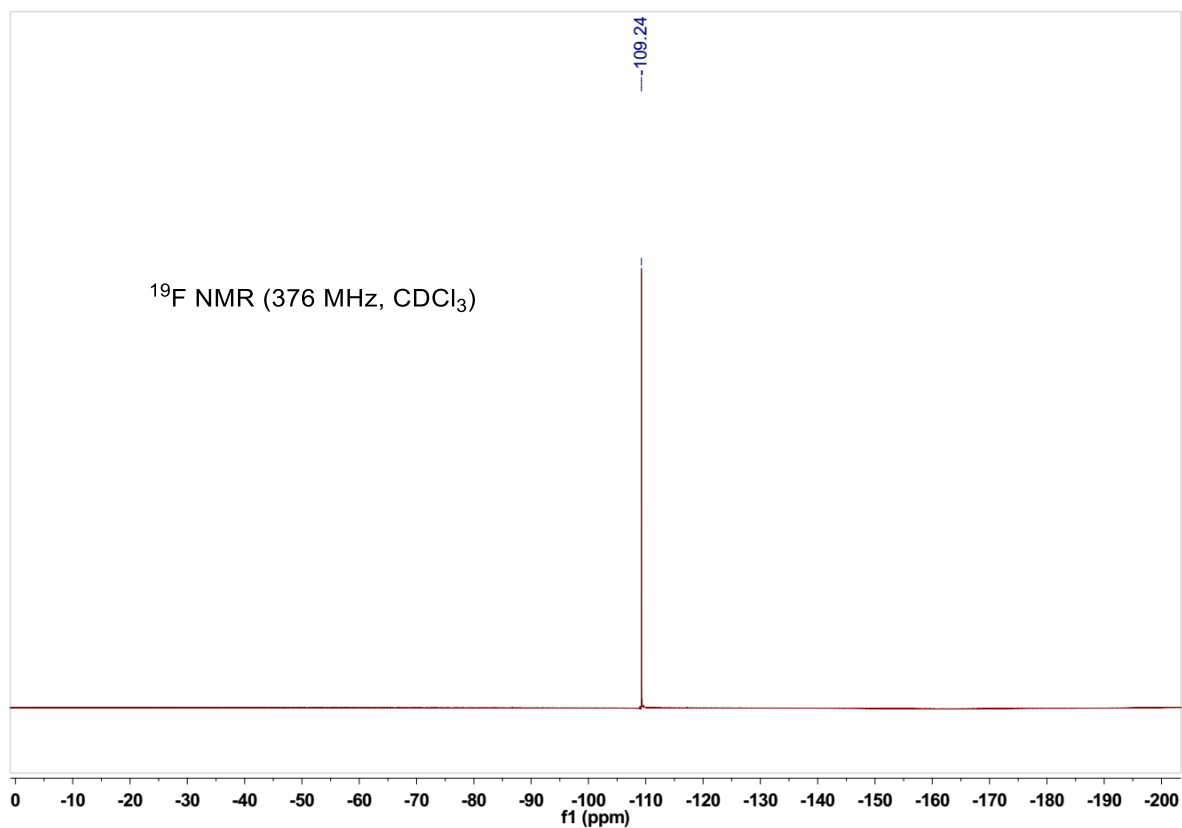

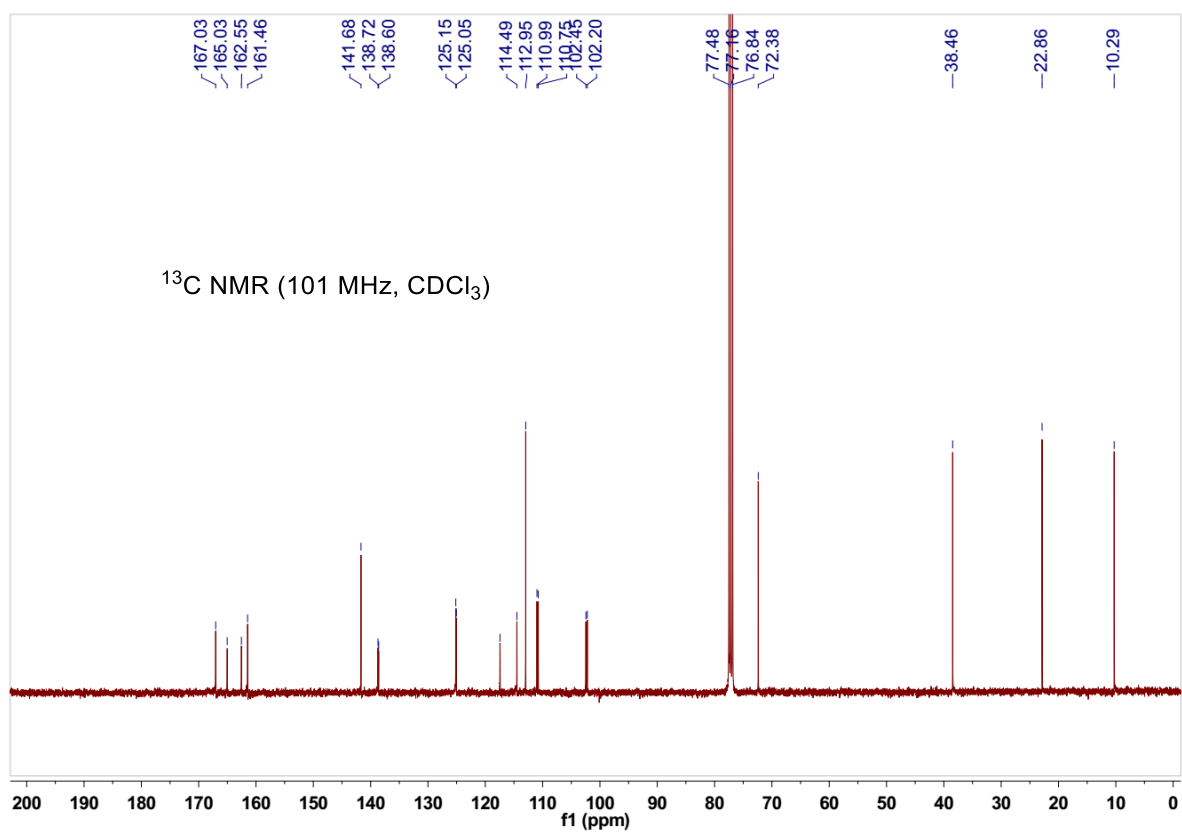

**3-methyl-4-((3,4,4-trifluorobut-3-en-1-yl)oxy)quinolin-2(1H)-one (8):**

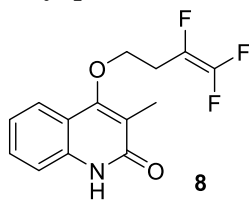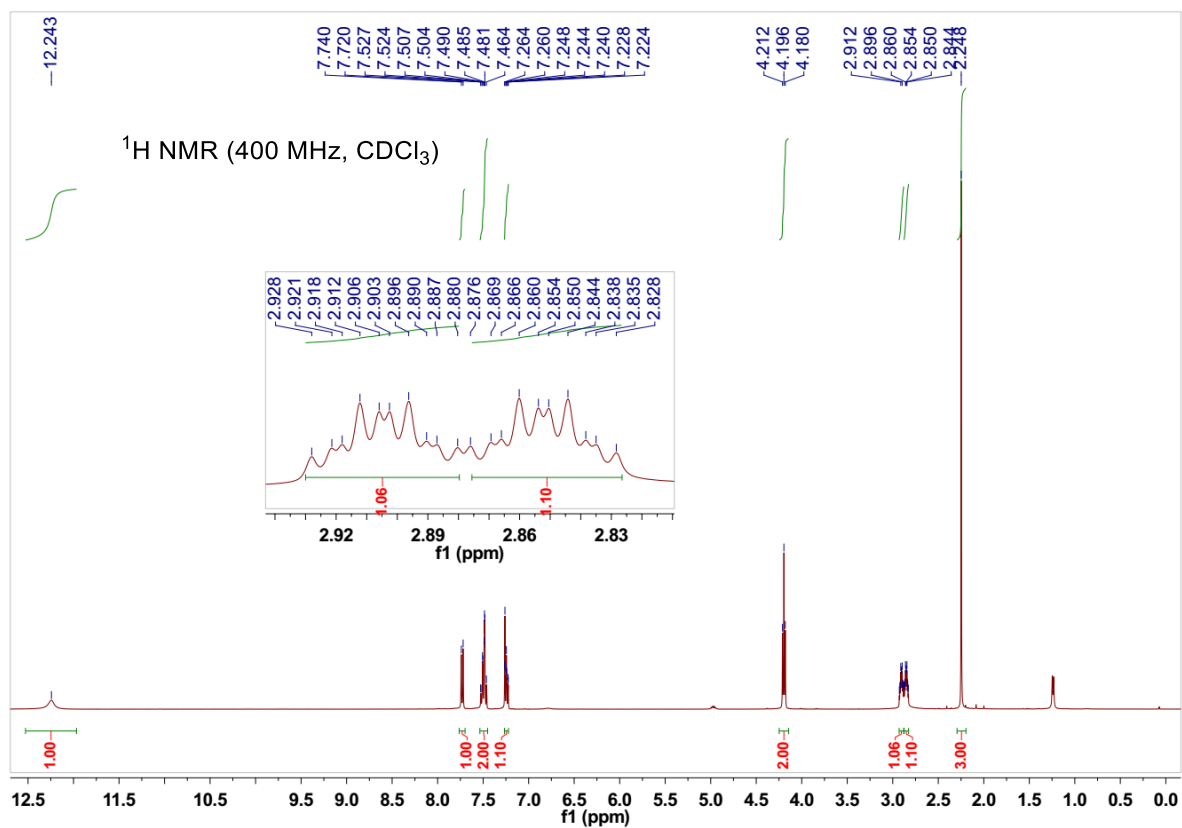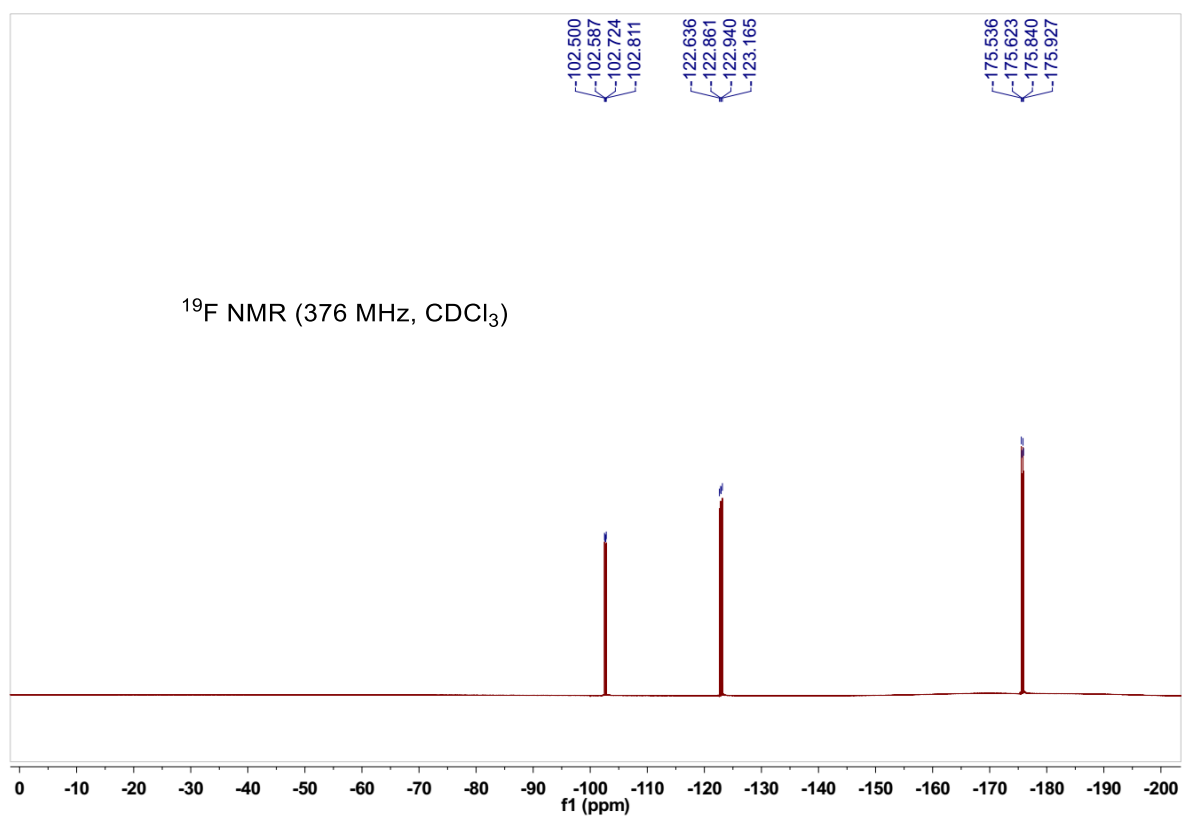

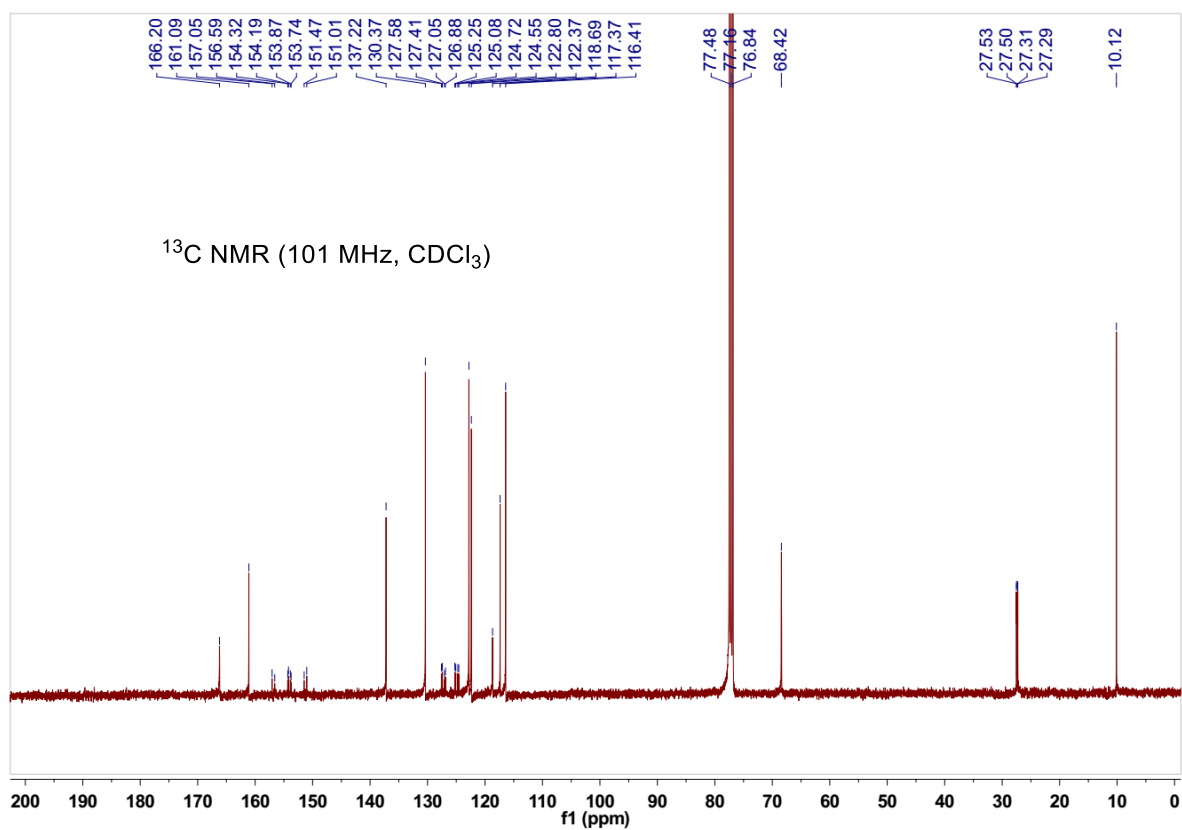



**4-((4 $\lambda^5$ -penta-3,4-dien-1-yl)oxy)-3-methylquinolin-2(1*H*)-one (10a):**

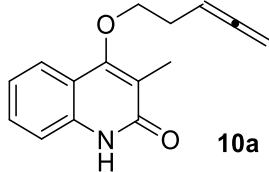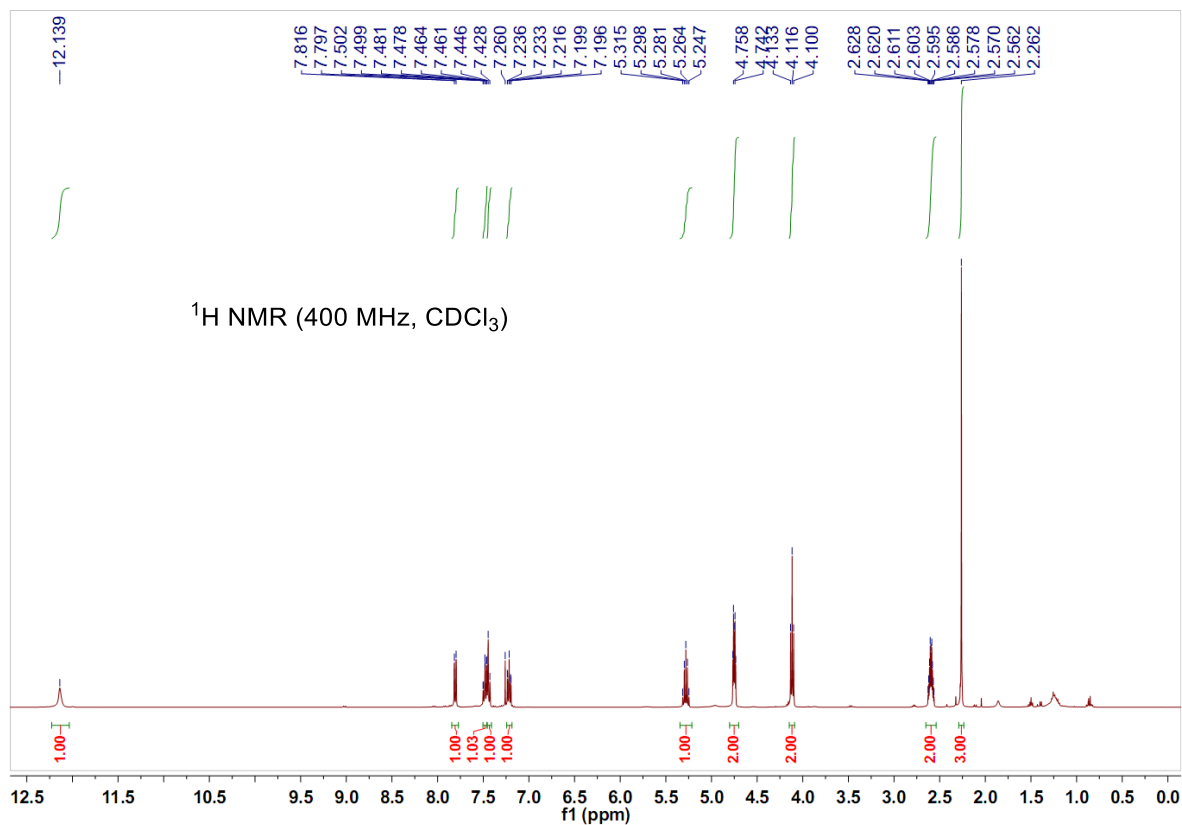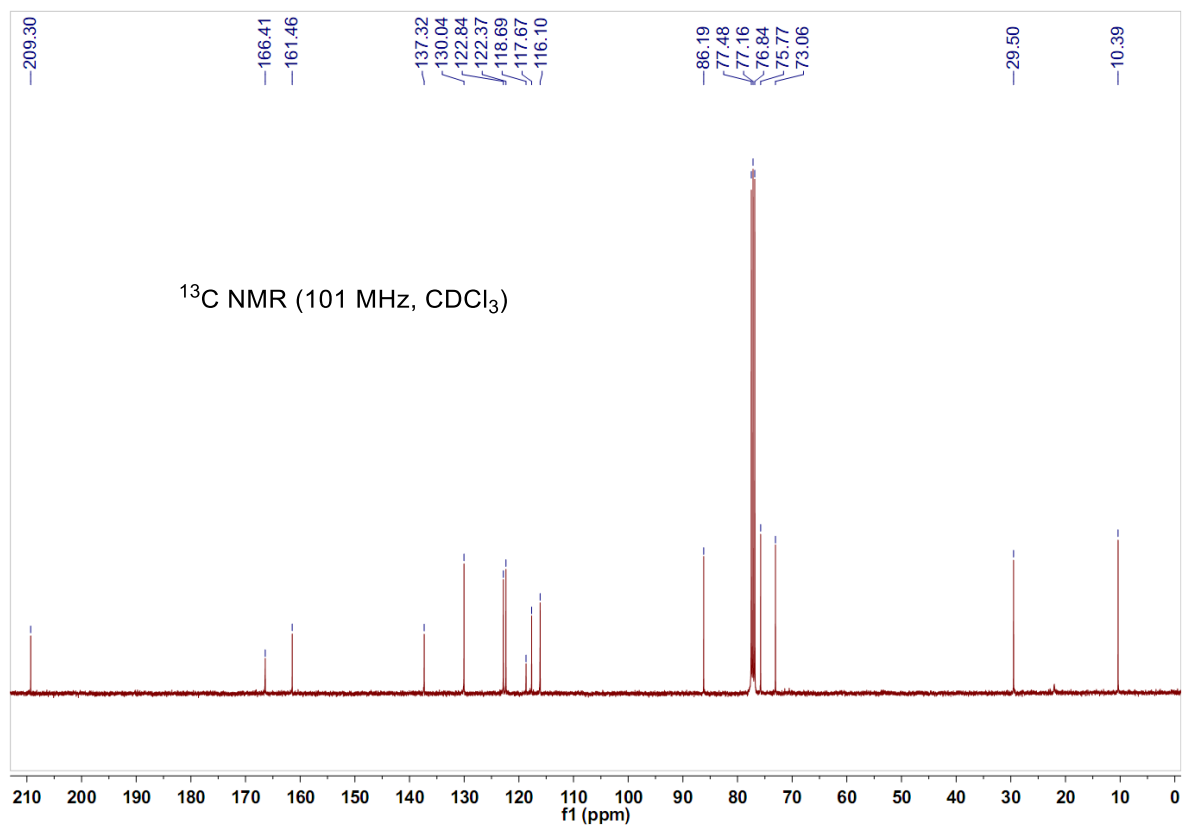

**3-methyl-4-((3-methyl-4λ<sup>5</sup>-penta-3,4-dien-1-yl)oxy)quinolin-2(1H)-one (10b):**

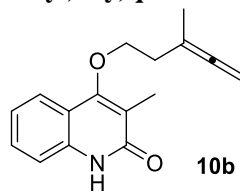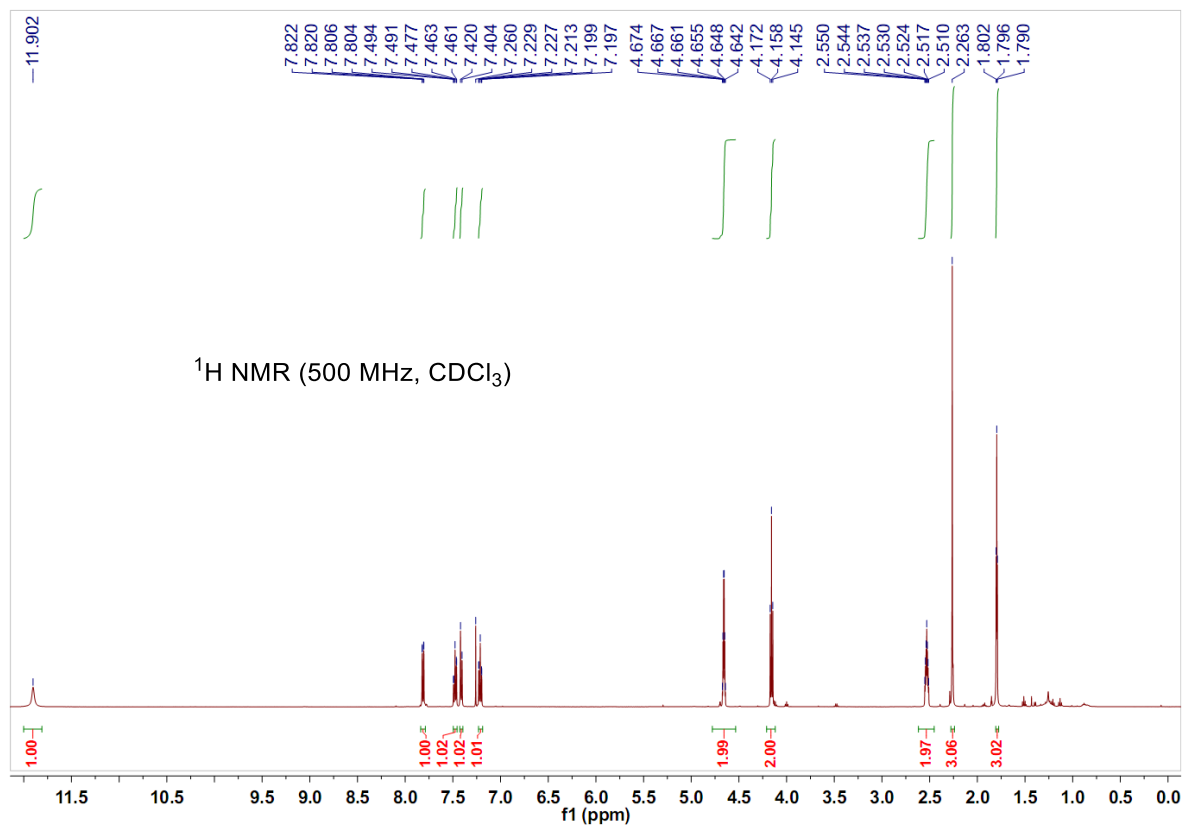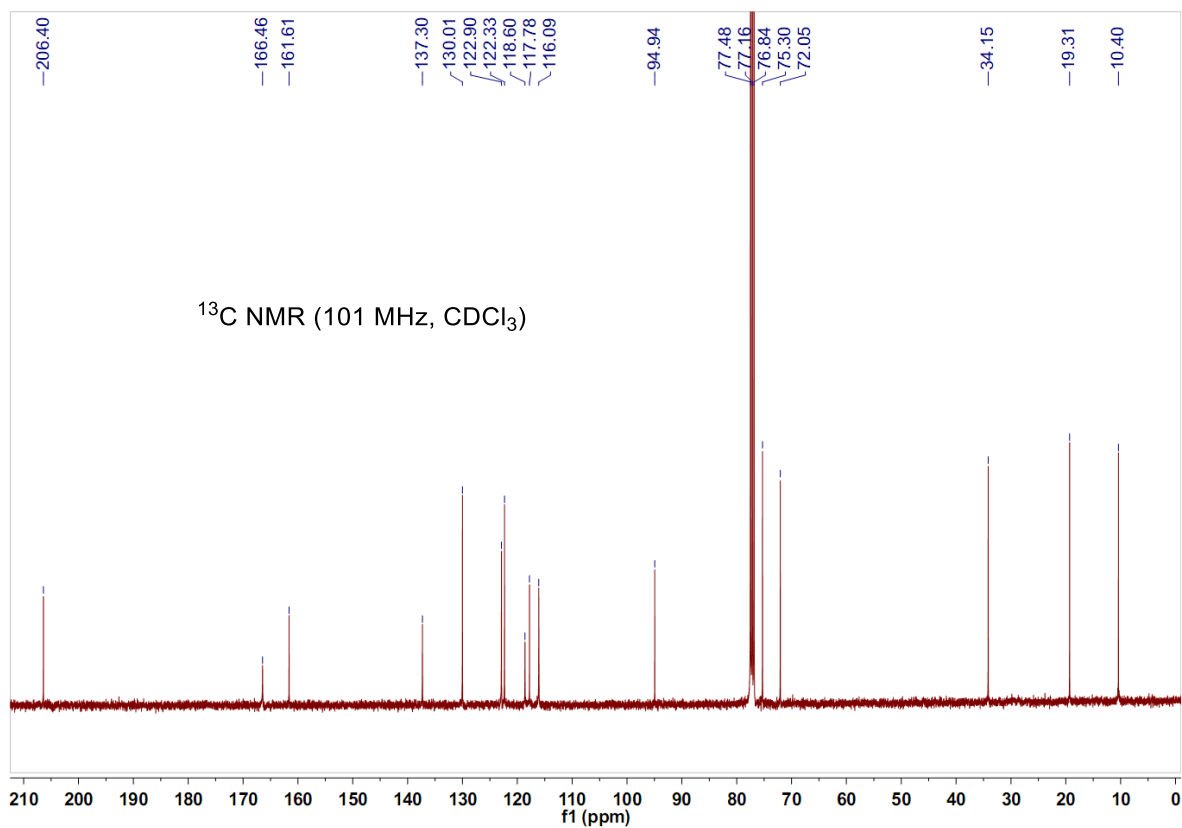

**6-chloro-3-methyl-4-((3-methyl-4 $\lambda^5$ -penta-3,4-dien-1-yl)oxy)quinolin-2(1*H*)-one (10c):**

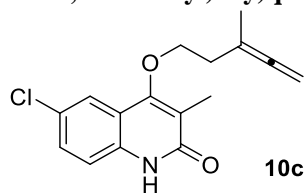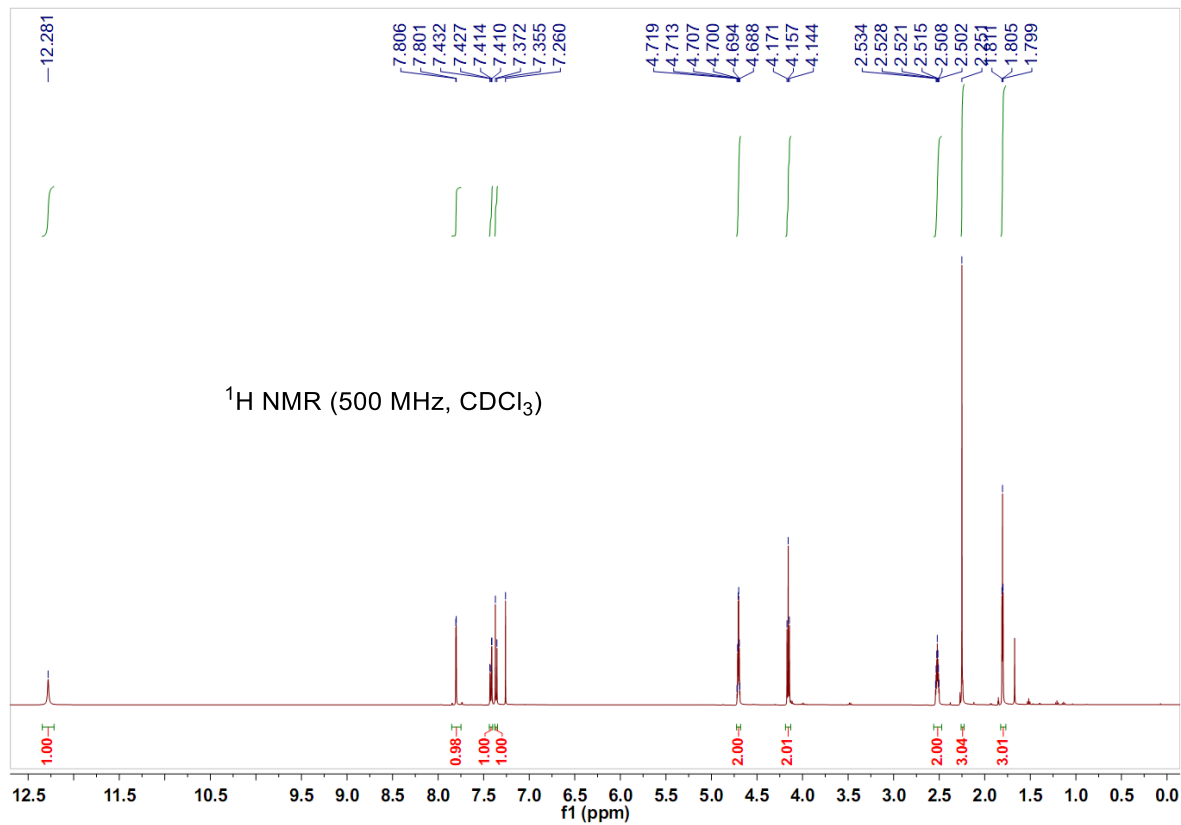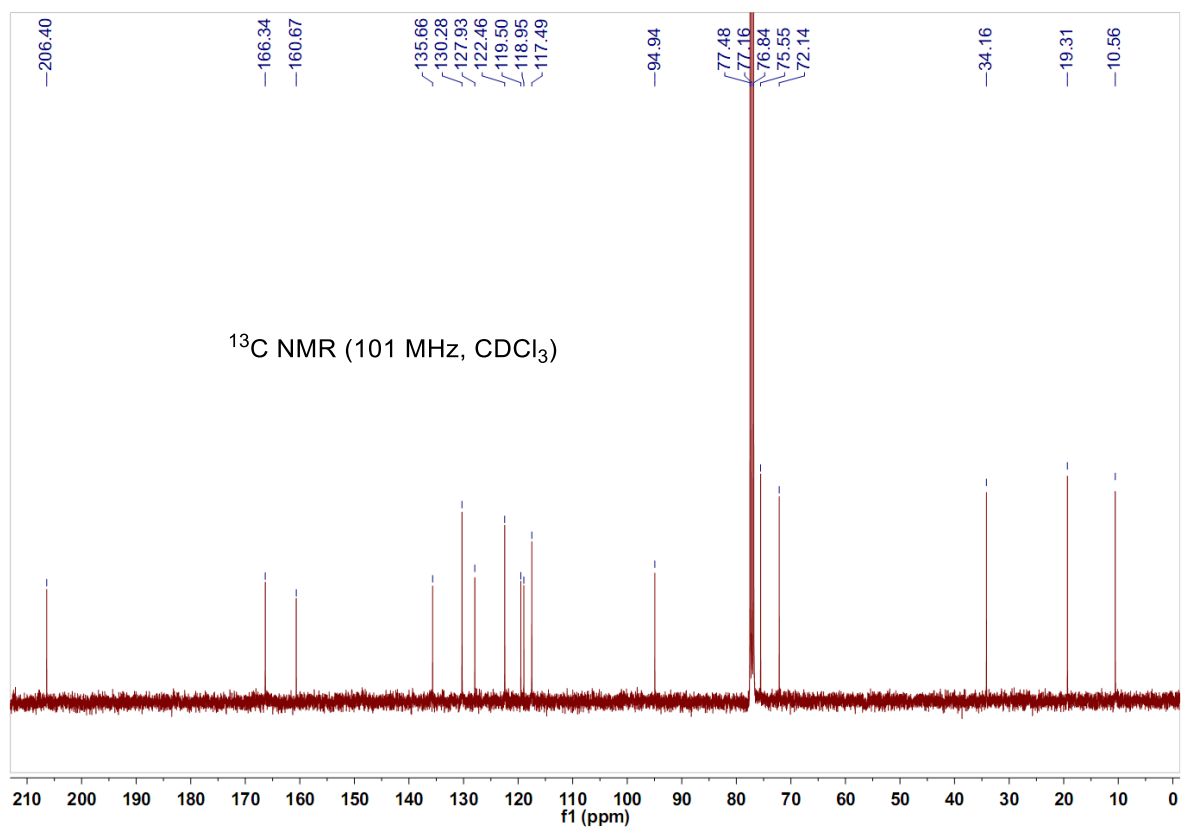

**3-ethyl-4-((3-methyl-4 $\lambda^5$ -penta-3,4-dien-1-yl)oxy)quinolin-2(1H)-one (10d):**

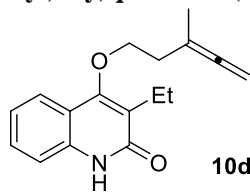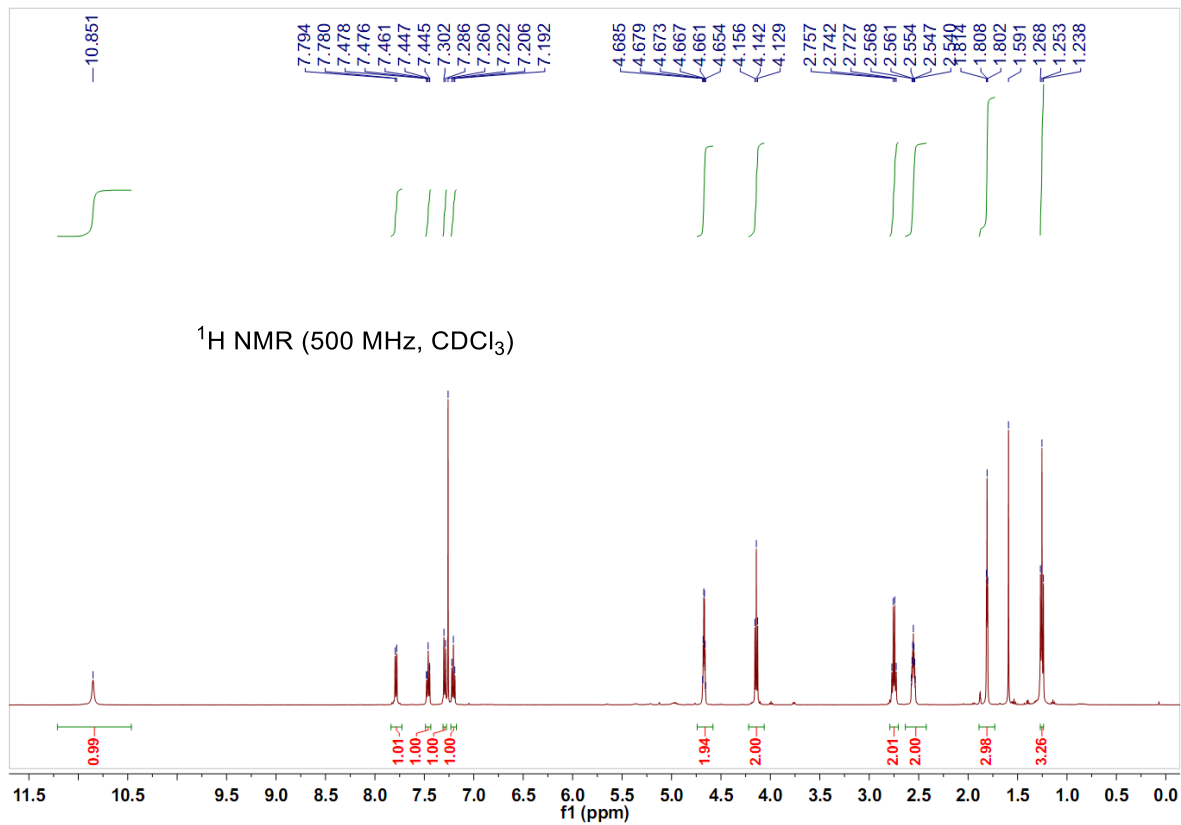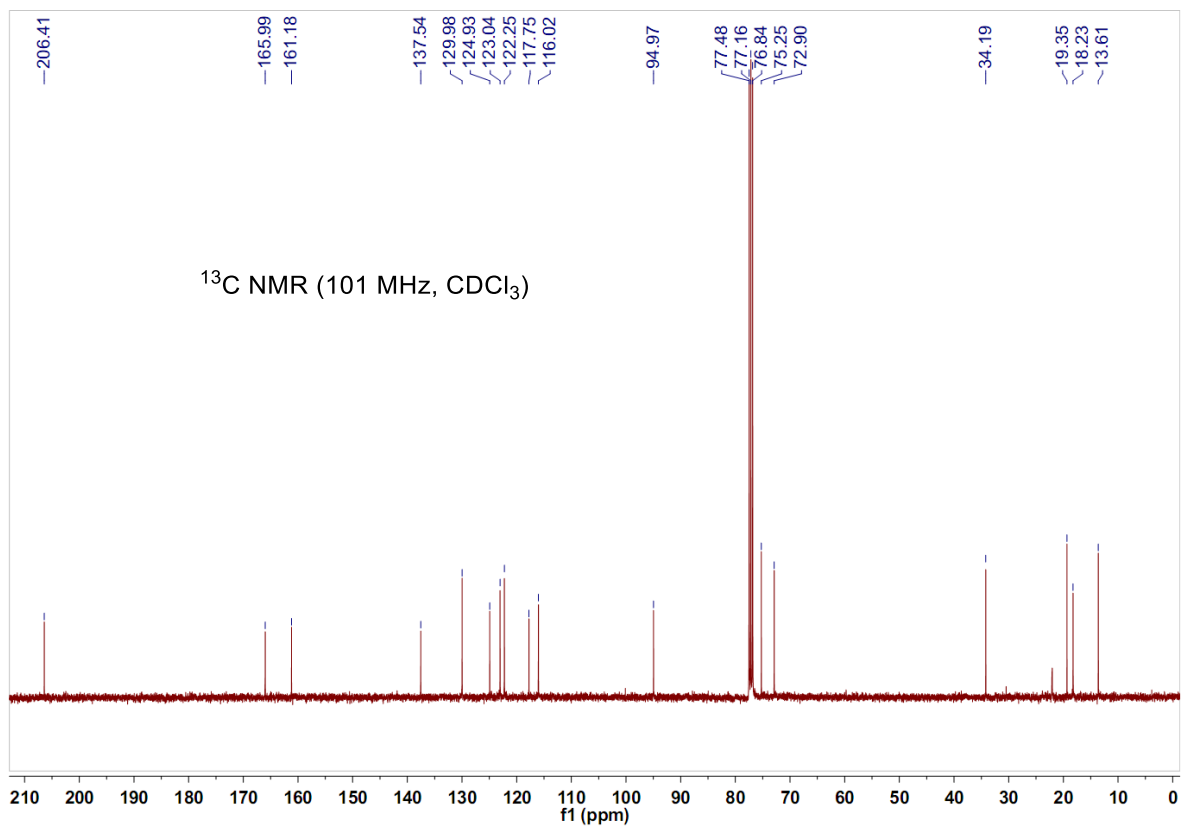

**4-((3 $\lambda^5$ -buta-2,3-dien-1-yl)oxy)-6-chloro-3-methylquinolin-2(1*H*)-one (12a):**

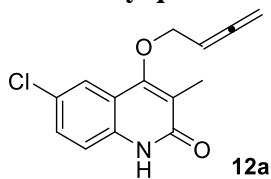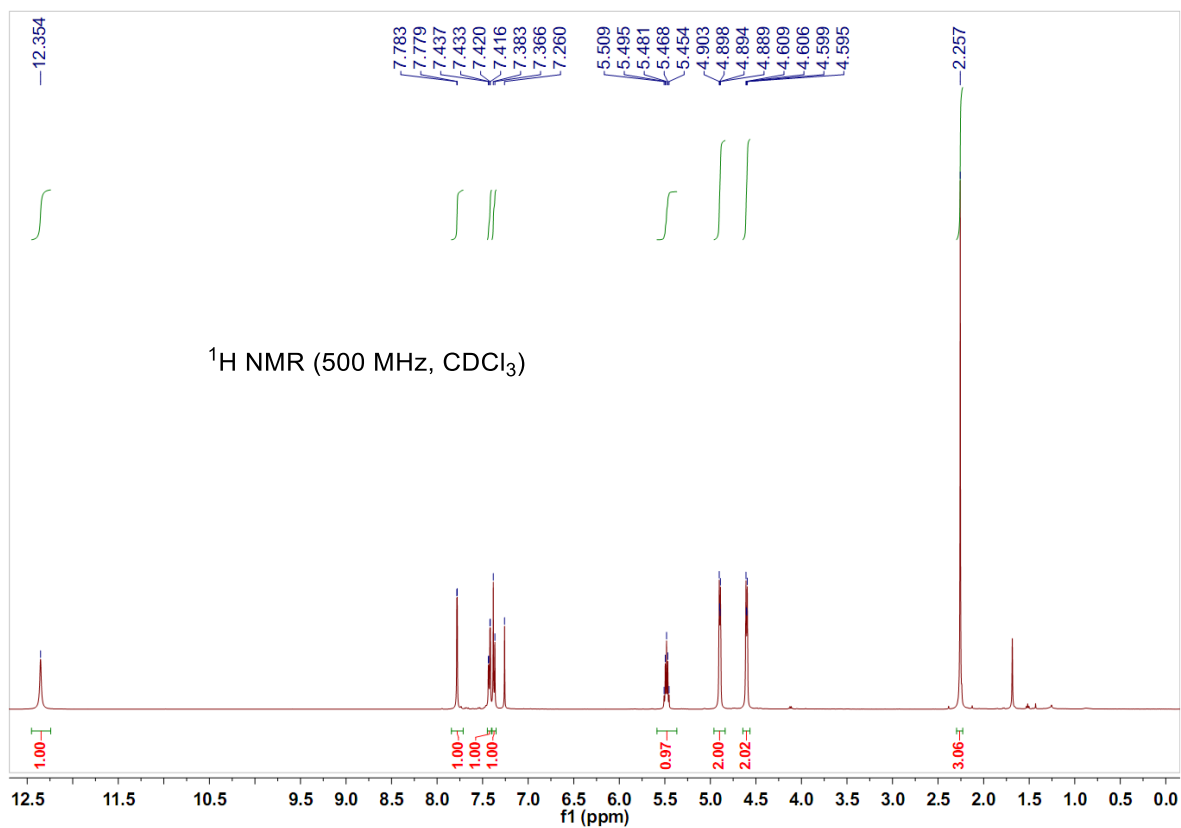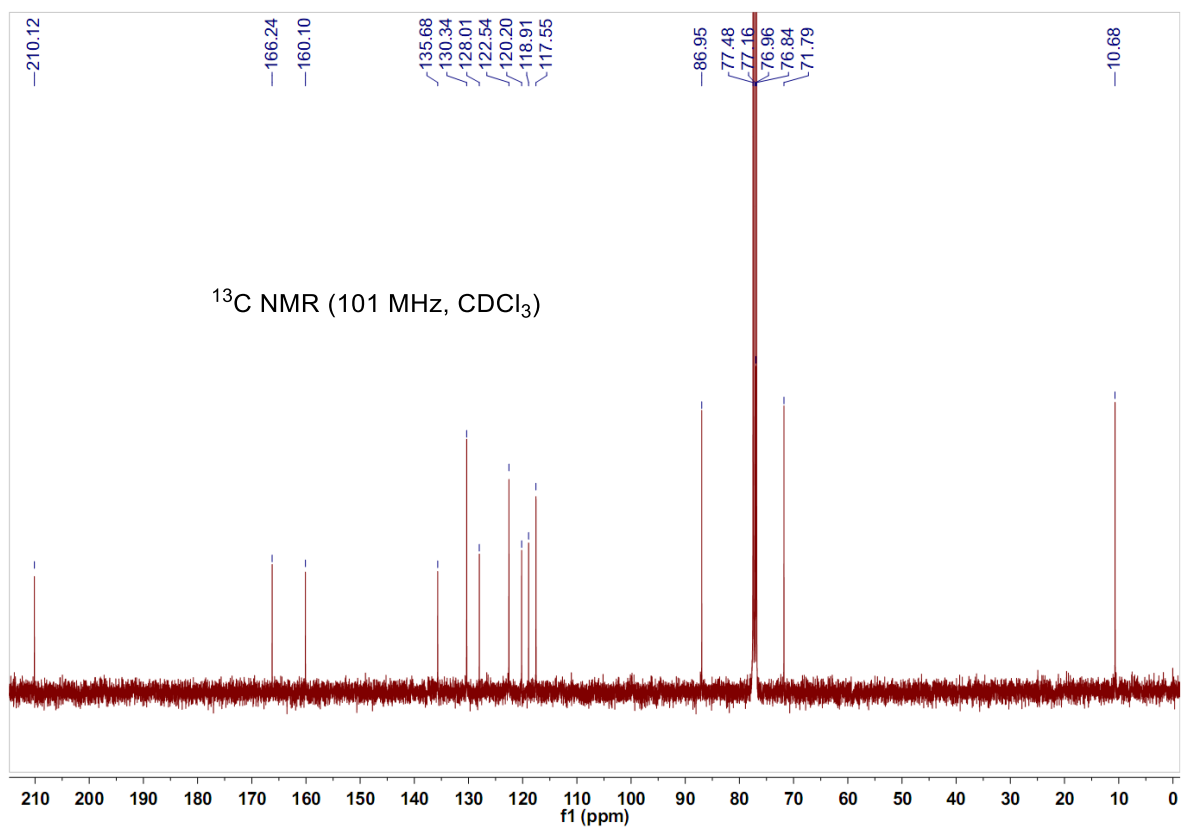

**4-((3 $\lambda^5$ -buta-2,3-dien-1-yl)oxy)-3-methylquinolin-2(1*H*)-one (12b):**

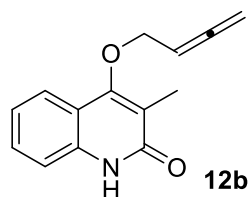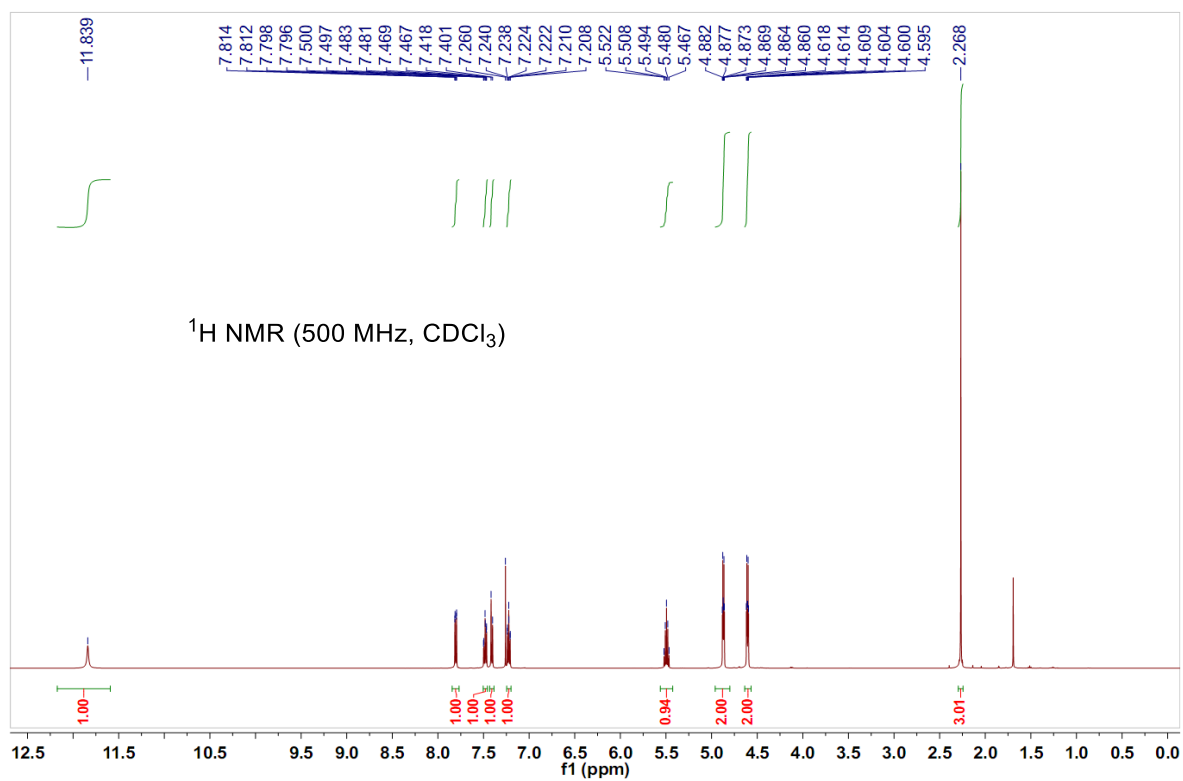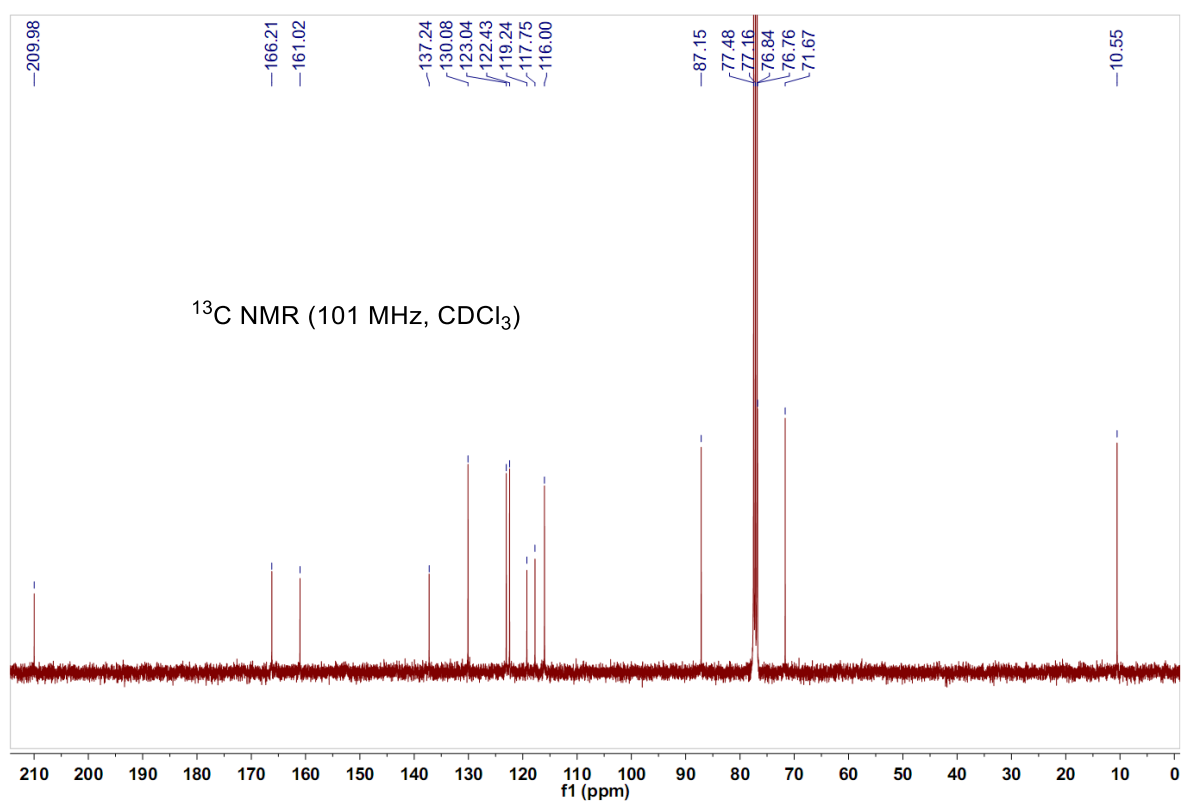

**3-methyl-4-((4-methyl-3λ<sup>5</sup>-penta-2,3-dien-1-yl)oxy)quinolin-2(1*H*)-one (15):**

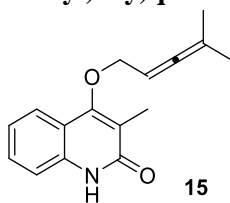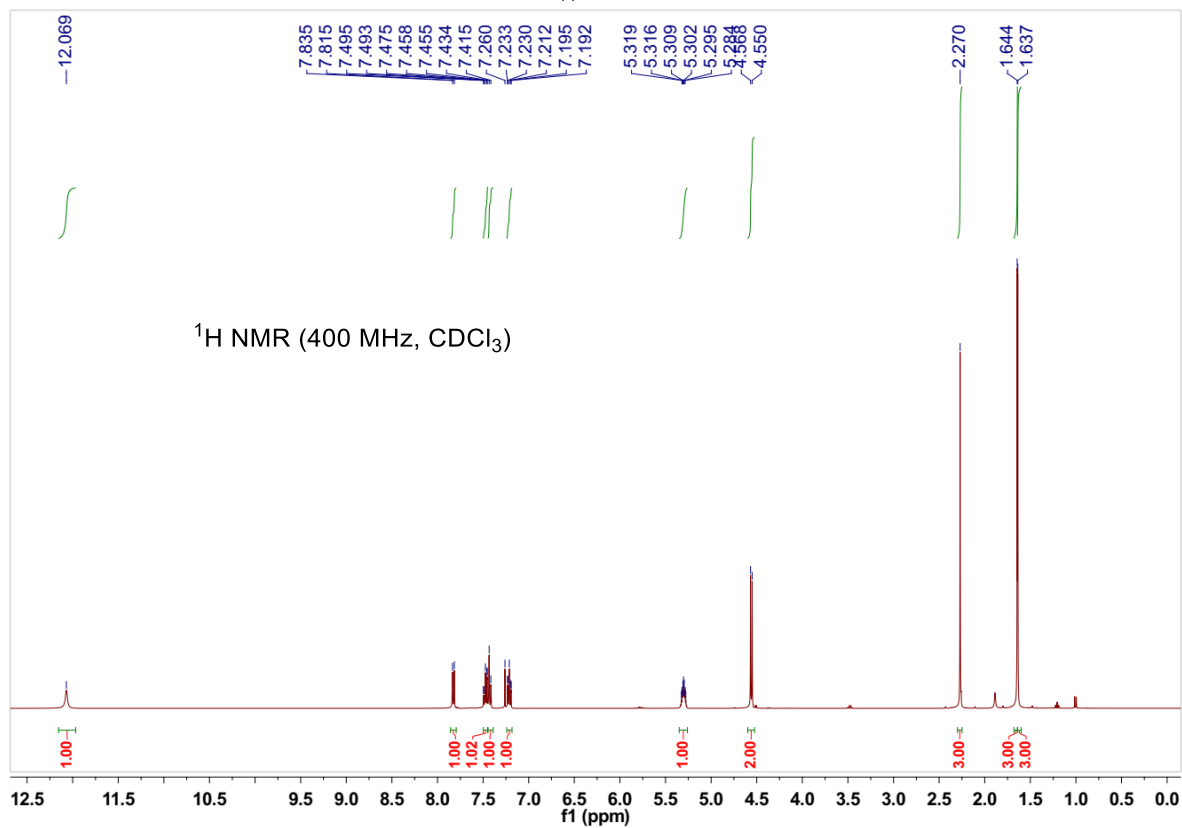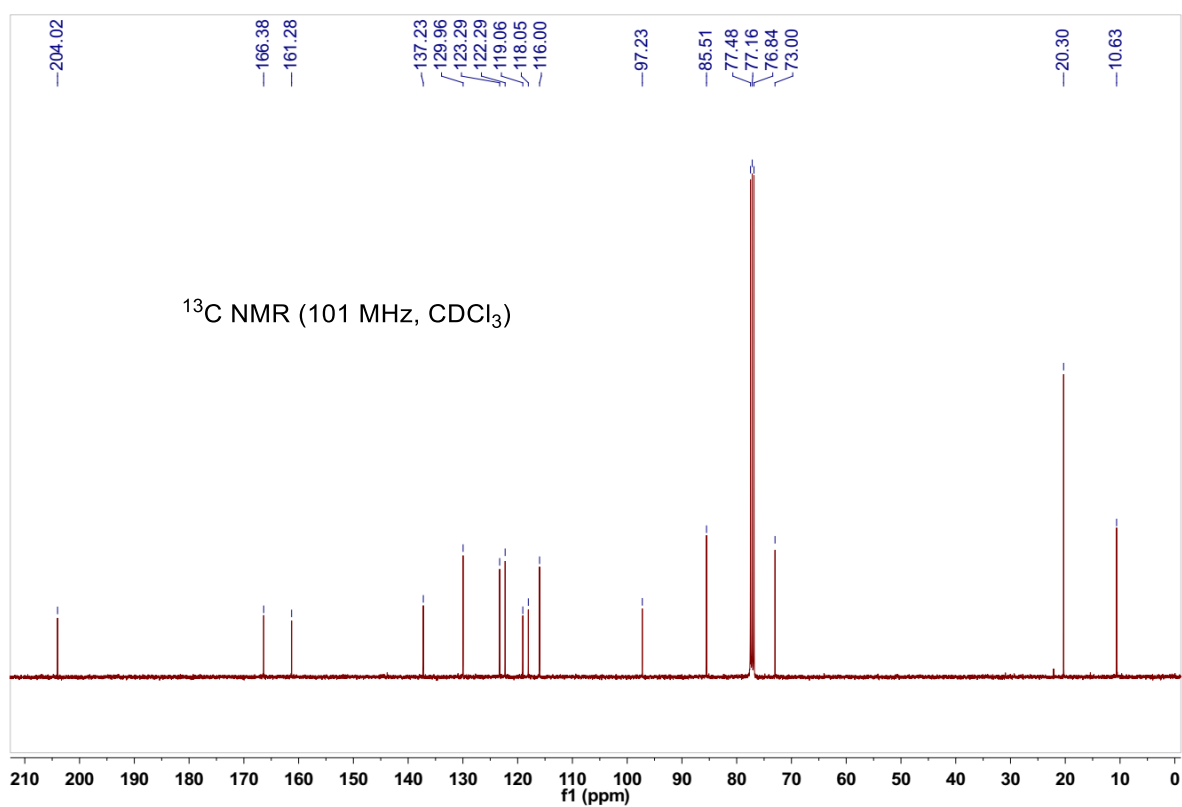

**(3aS,4aR,10bS)-4a-methyl-3,3a,4,4a-tetrahydro-2H-furo[2',3':2,3]cyclobuta[1,2-c]quinolin-5(6H)-one (7b):**

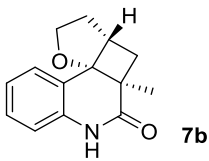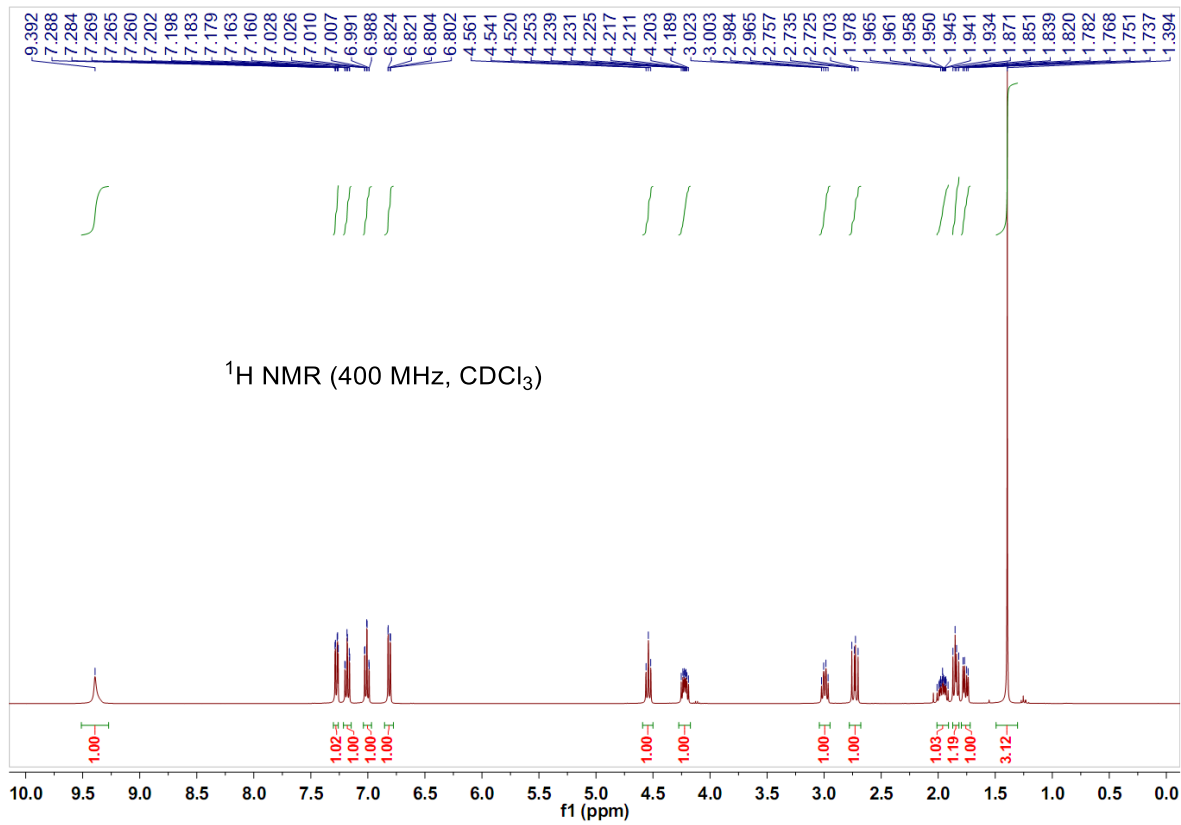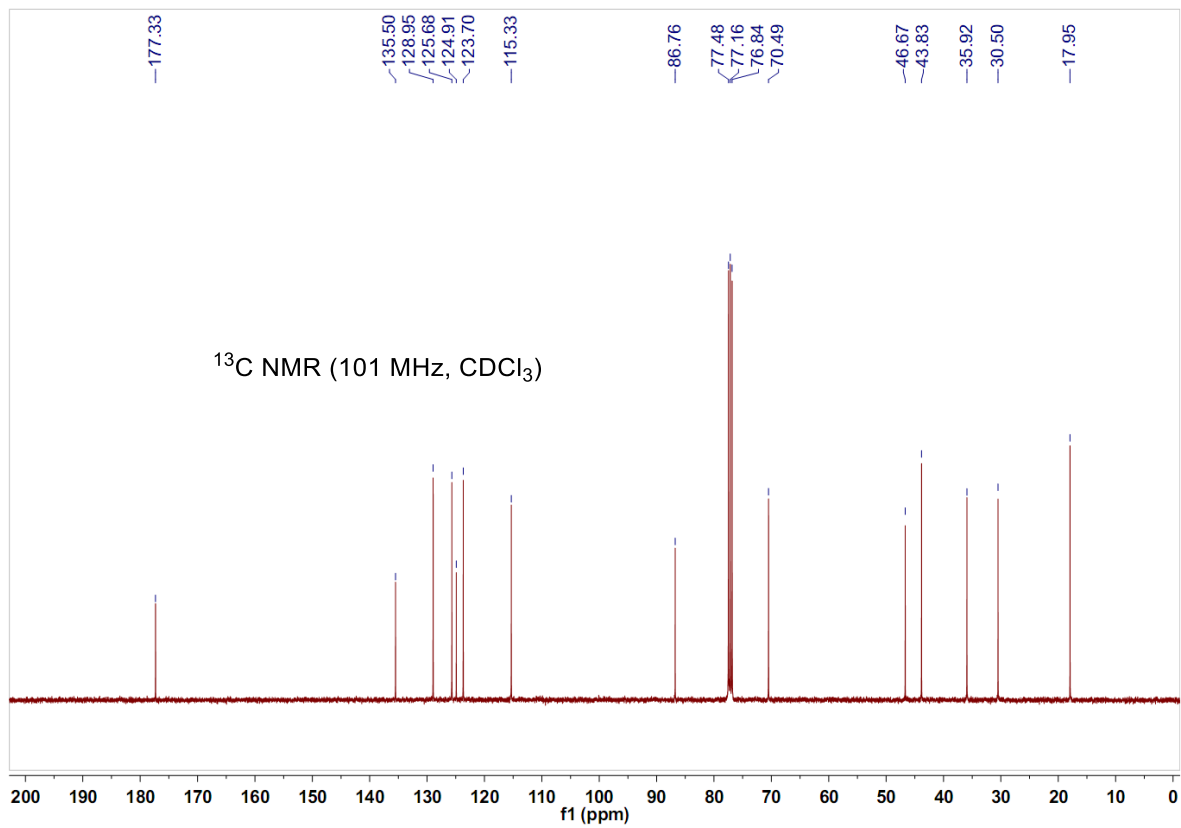



**7c**

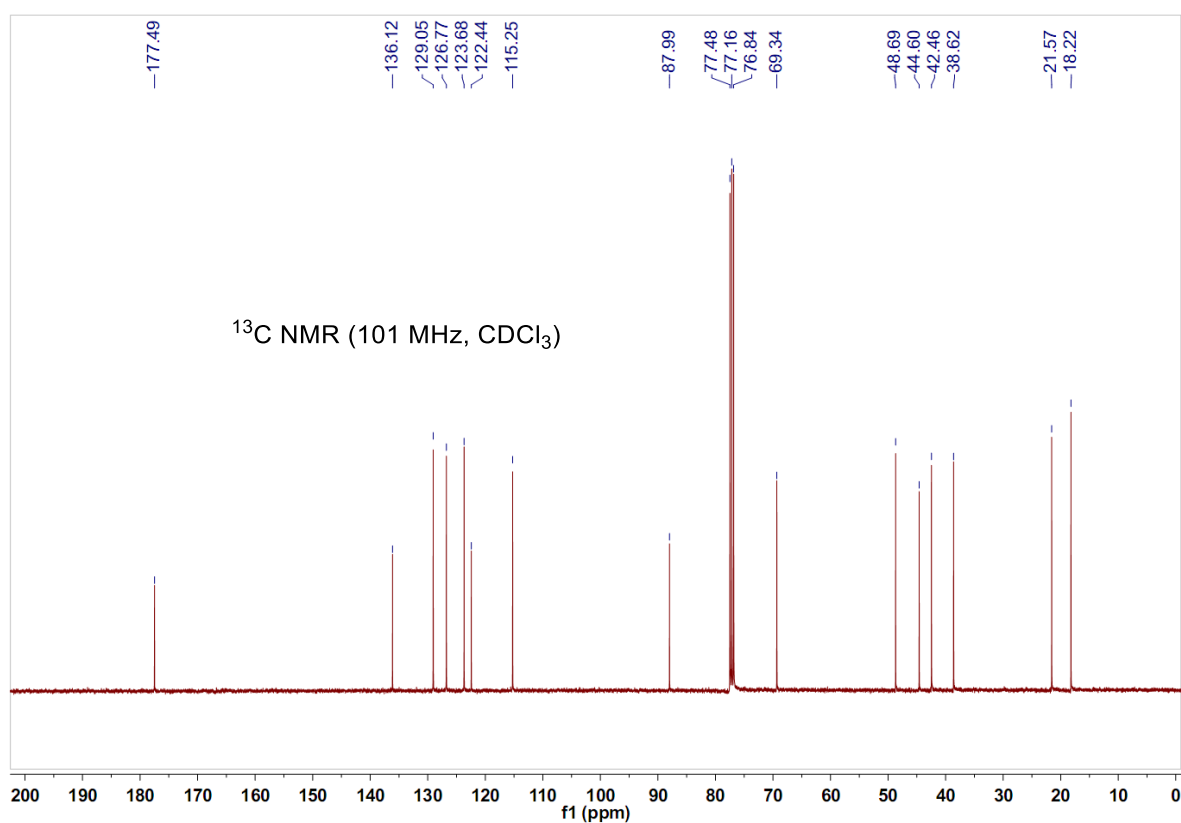

**(3a*R*,4a*R*,10b*S*)-4,4,4a-trimethyl-3,3a,4,4a-tetrahydro-2*H*-furo[2',3':2,3]cyclobuta[1,2-*c*]quinolin-5(6*H*)-one (7d):**

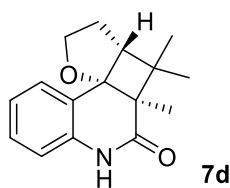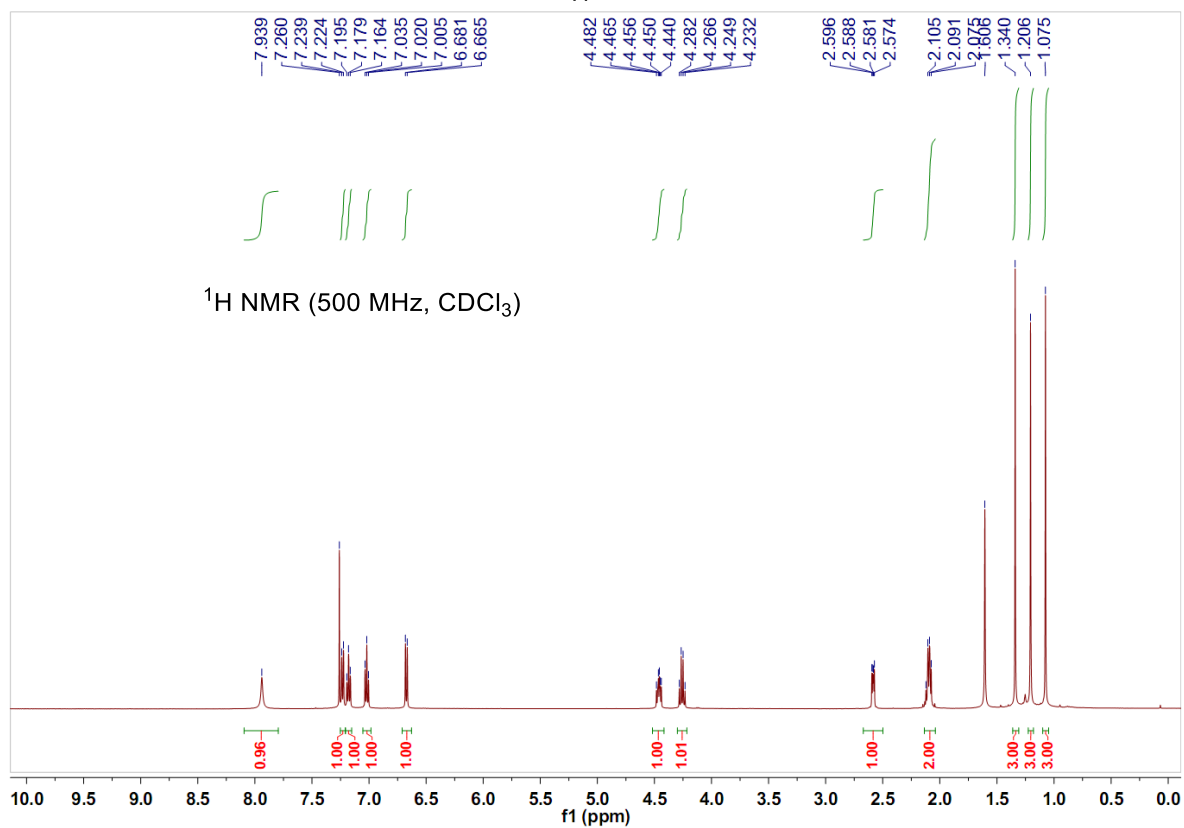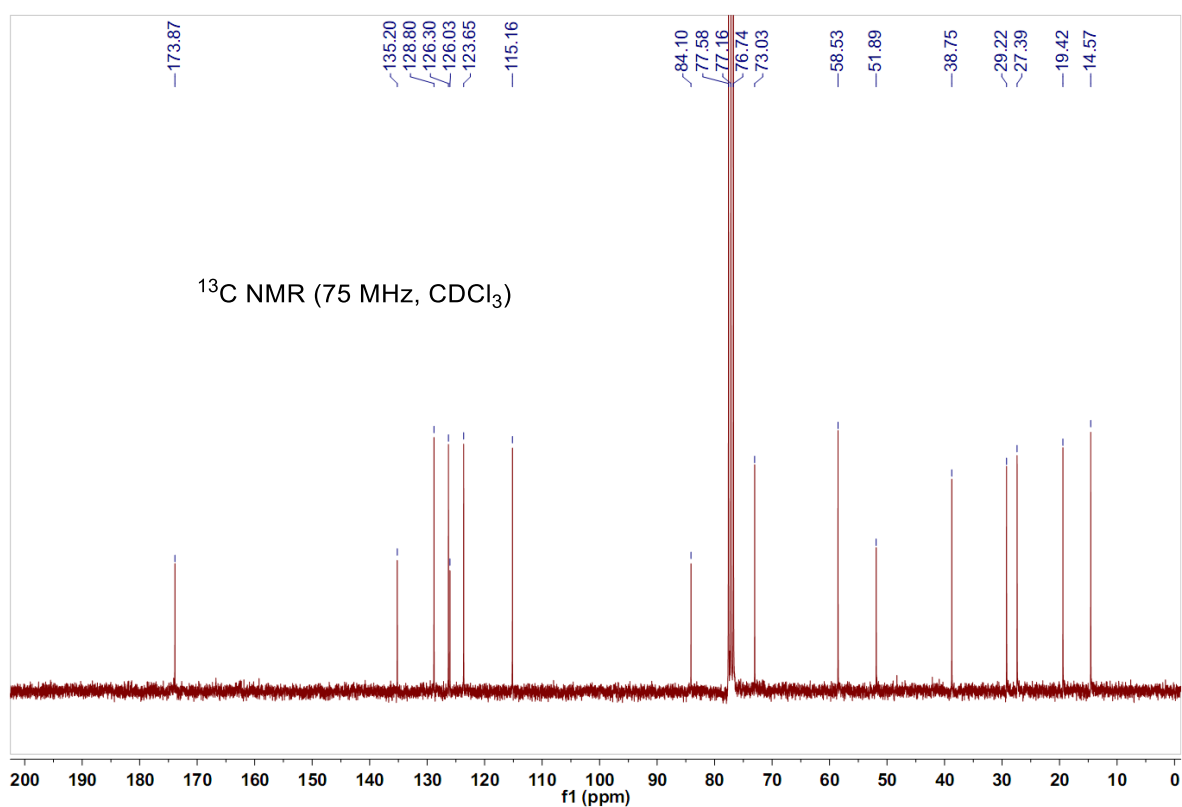

(6a*R*,6b*R*,9a*R*,12a*S*)-6a-methyl-6b,7,8,9,10,11-hexahydro-5*H*-cyclopenta[3,4]furo[2',3':2,3]cyclobuta-[1,2-*c*]quinolin-6(6a*H*)-one (7e):

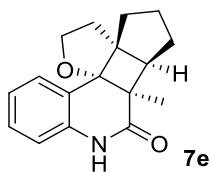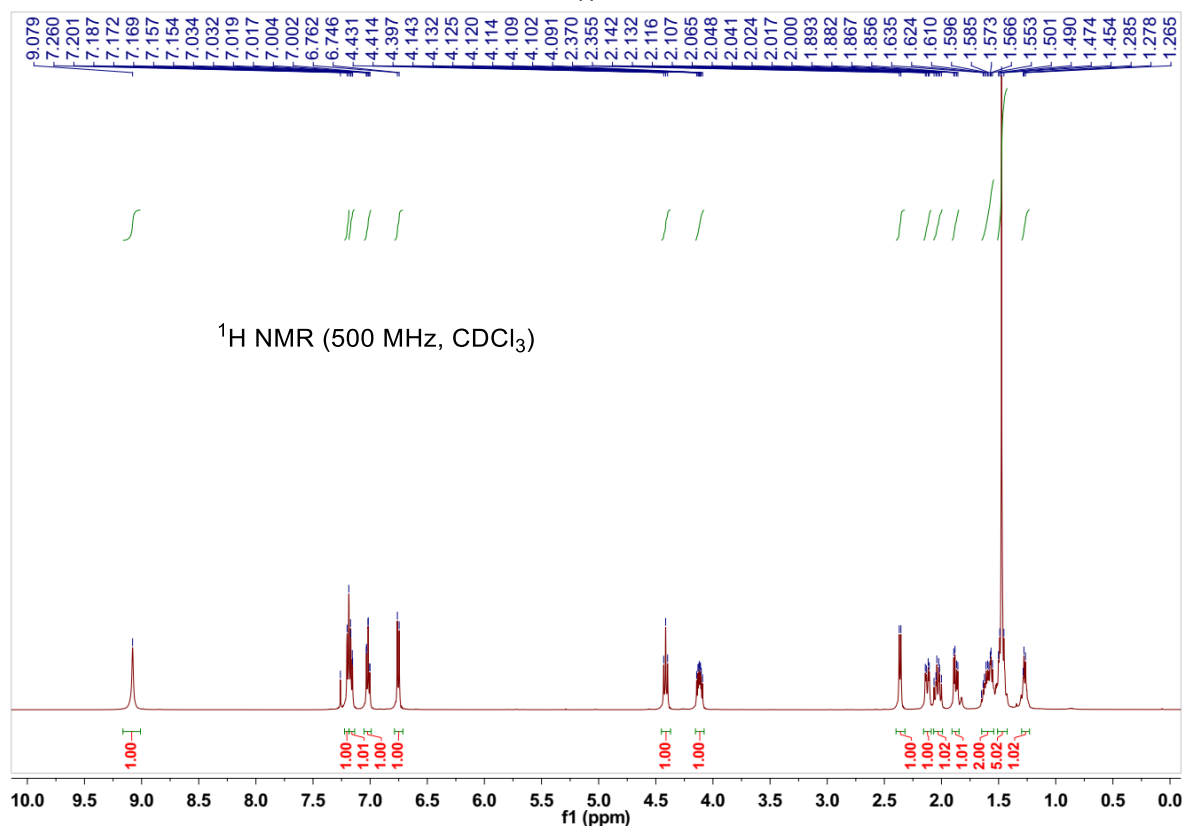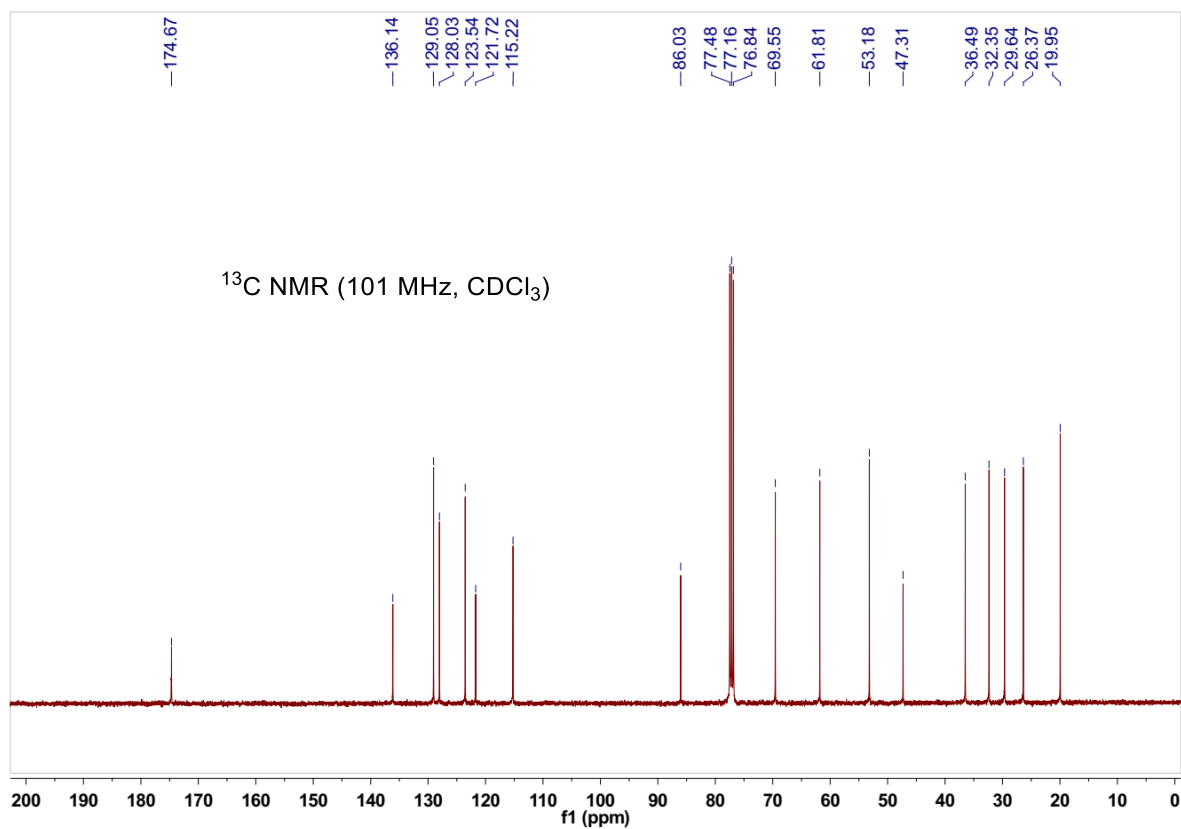

(6a*R*,6b*R*,10a*R*,13a*S*)-6a-methyl-6a,6b,7,8,9,10,11,12-octahydrobenzo[3,4]furo[2',3':2,3]cyclobuta-[1,2-*c*]quinolin-6(5*H*)-one (7f):

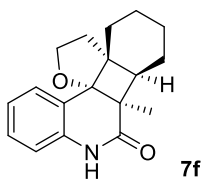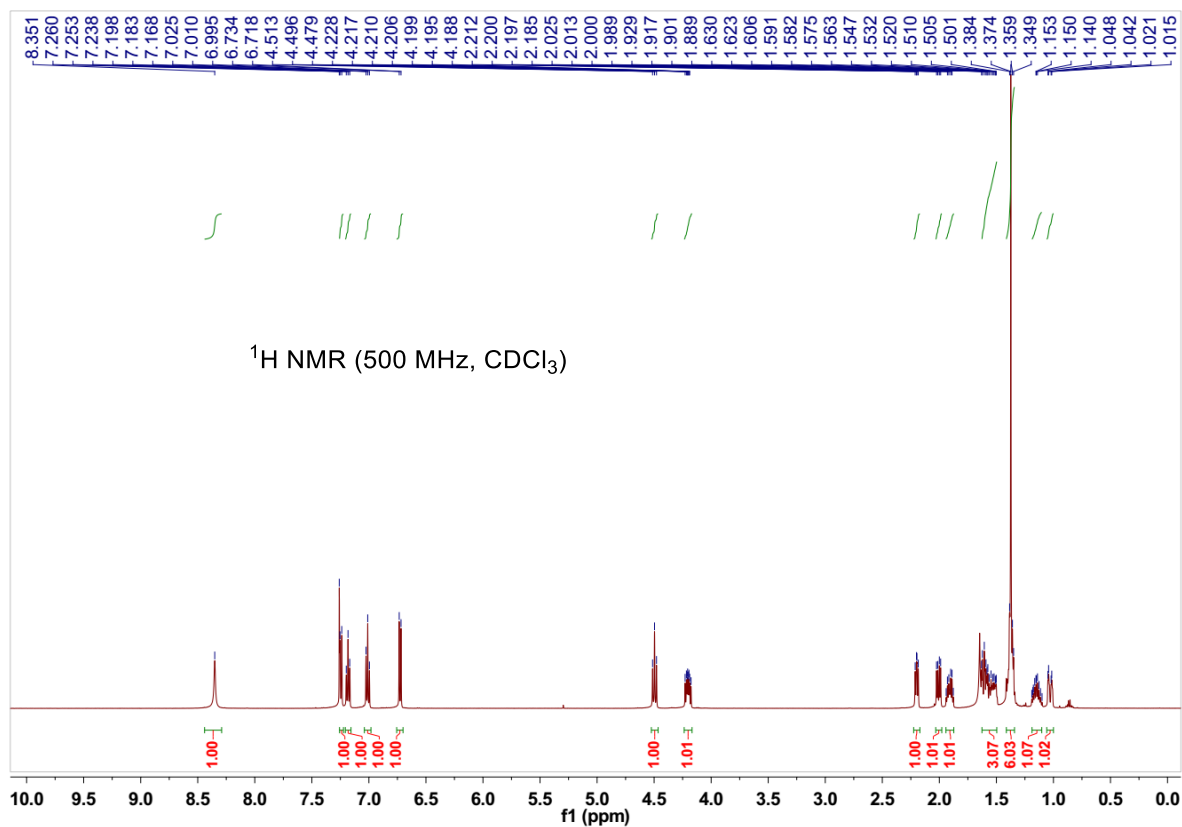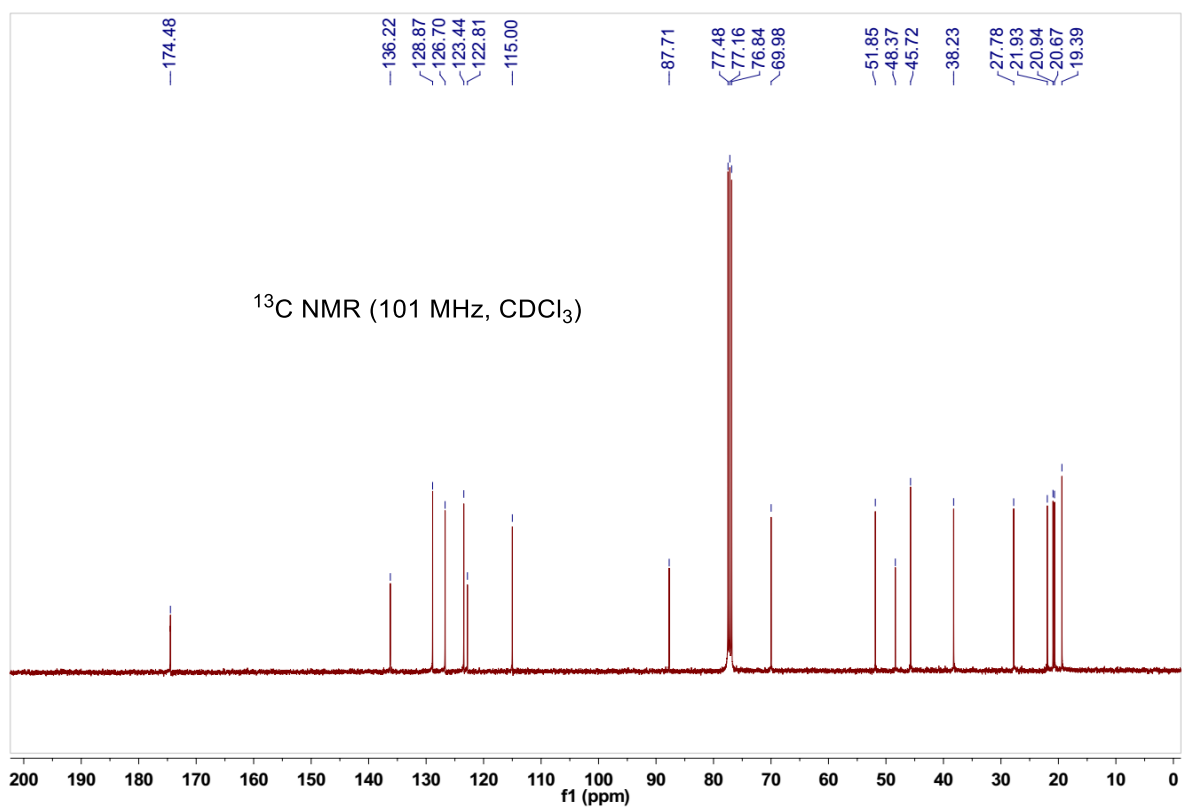

(3a*S*,4a*R*,10b*S*)-9-methoxy-3a,4a-dimethyl-3,3a,4,4a-tetrahydro-2*H*-furo[2',3':2,3]cyclobuta[1,2-*c*]quinolin-5(6*H*)-one (7g):

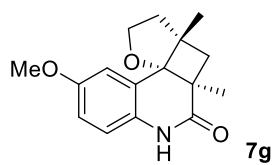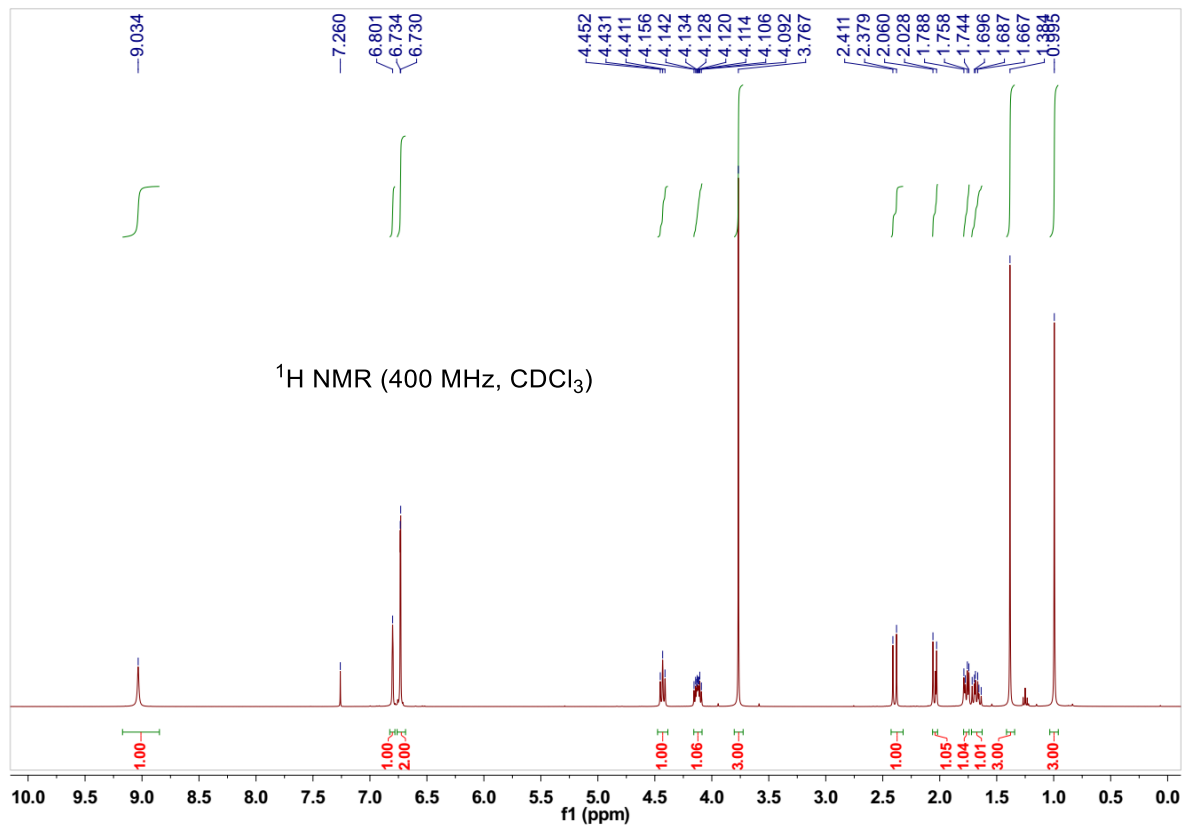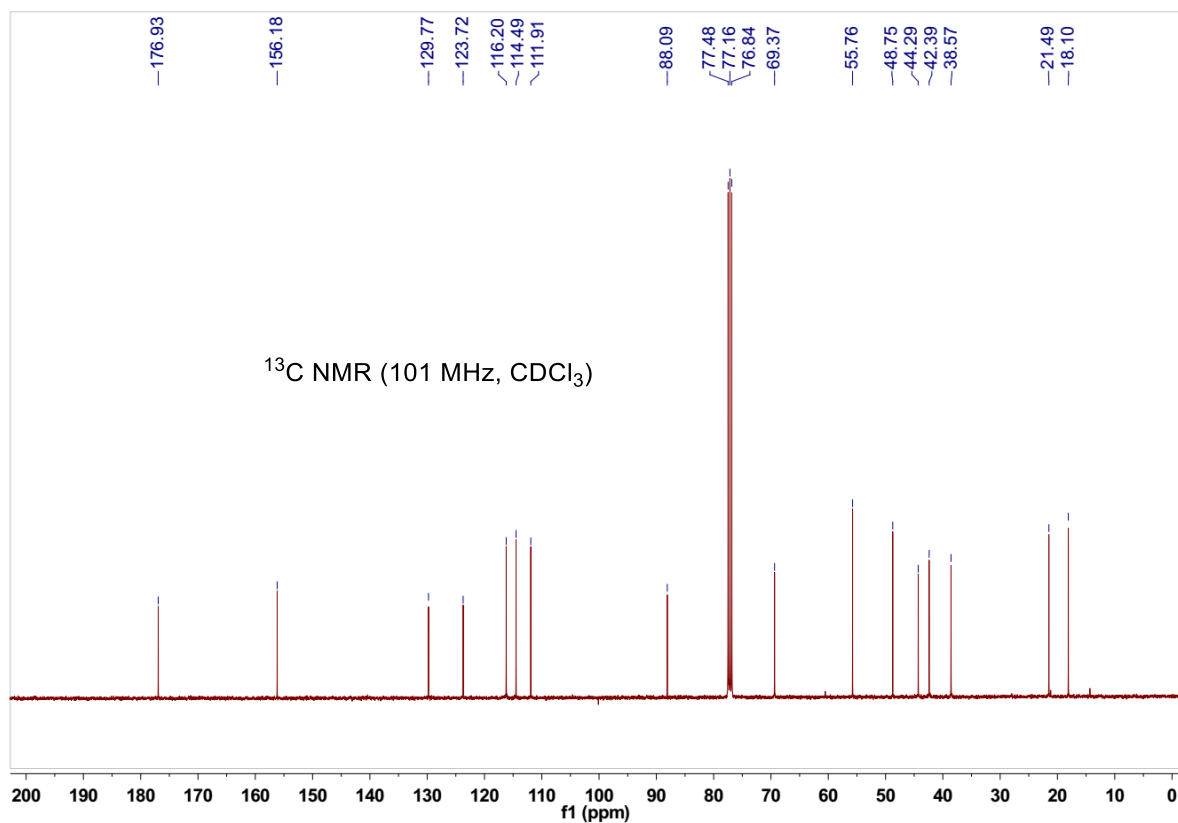

(3a*S*,4a*R*,10b*S*)-3a,4a,9-trimethyl-3,3a,4,4a-tetrahydro-2*H*-furo[2',3':2,3]cyclobuta[1,2-*c*]quinolin-5(6*H*)-one (7h):

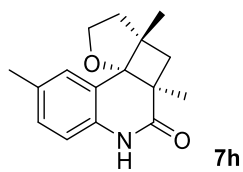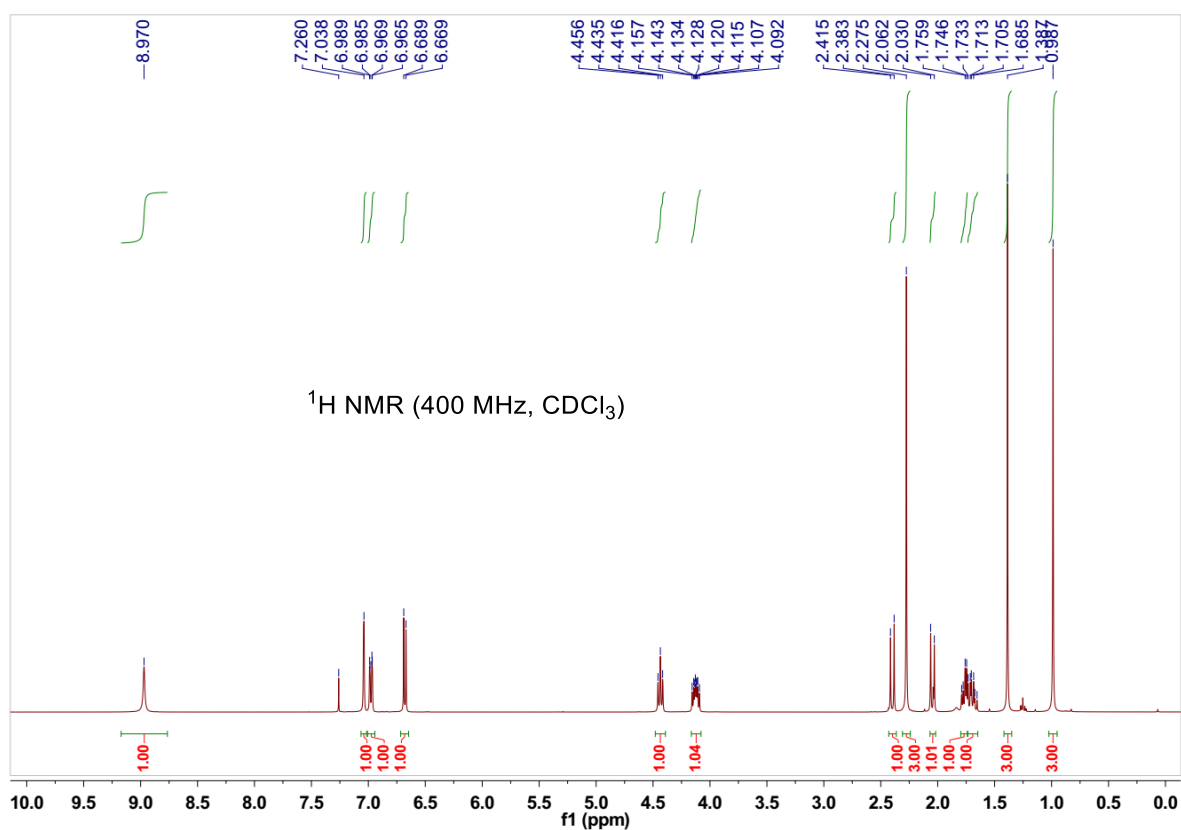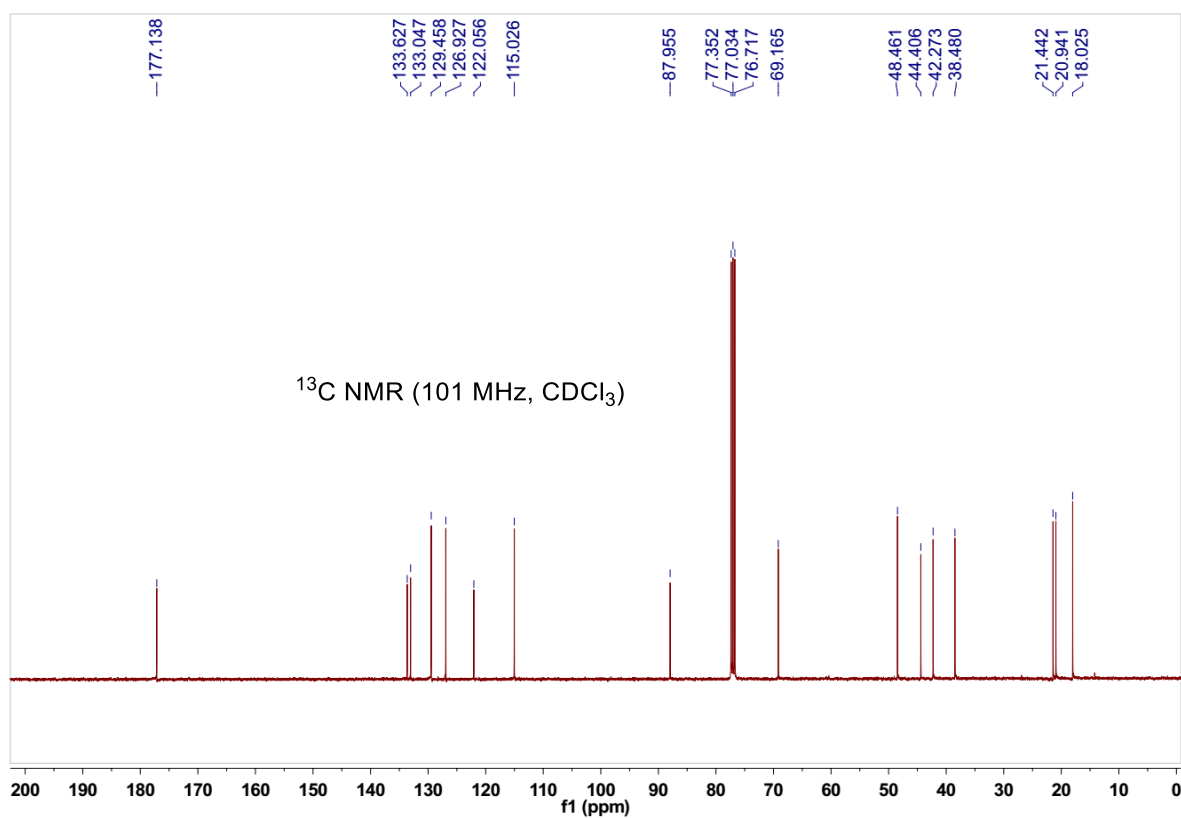

(3a*S*,4a*R*,10b*S*)-9-fluoro-3a,4a-dimethyl-3,3a,4,4a-tetrahydro-2*H*-furo[2',3':2,3]cyclobuta[1,2-*c*]quinolin-5(6*H*)-one (7i):

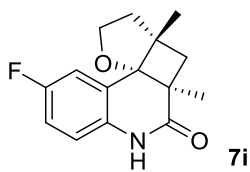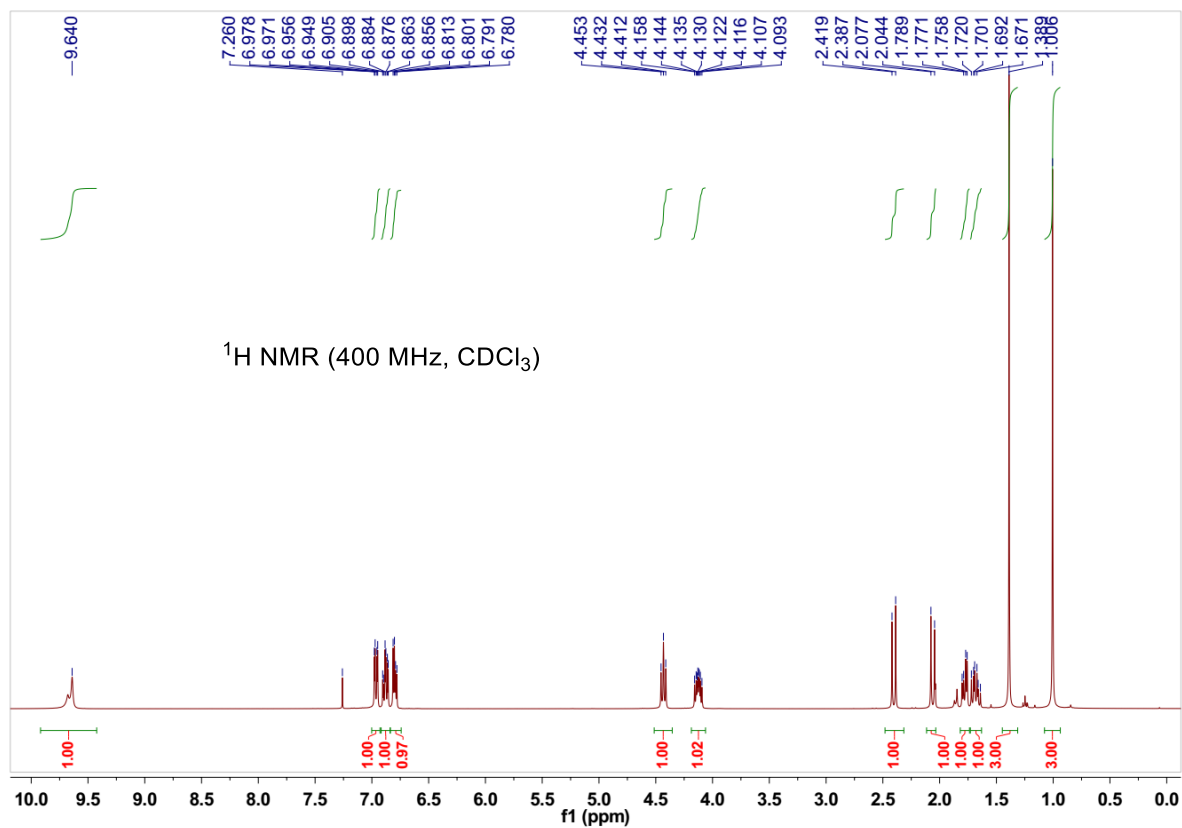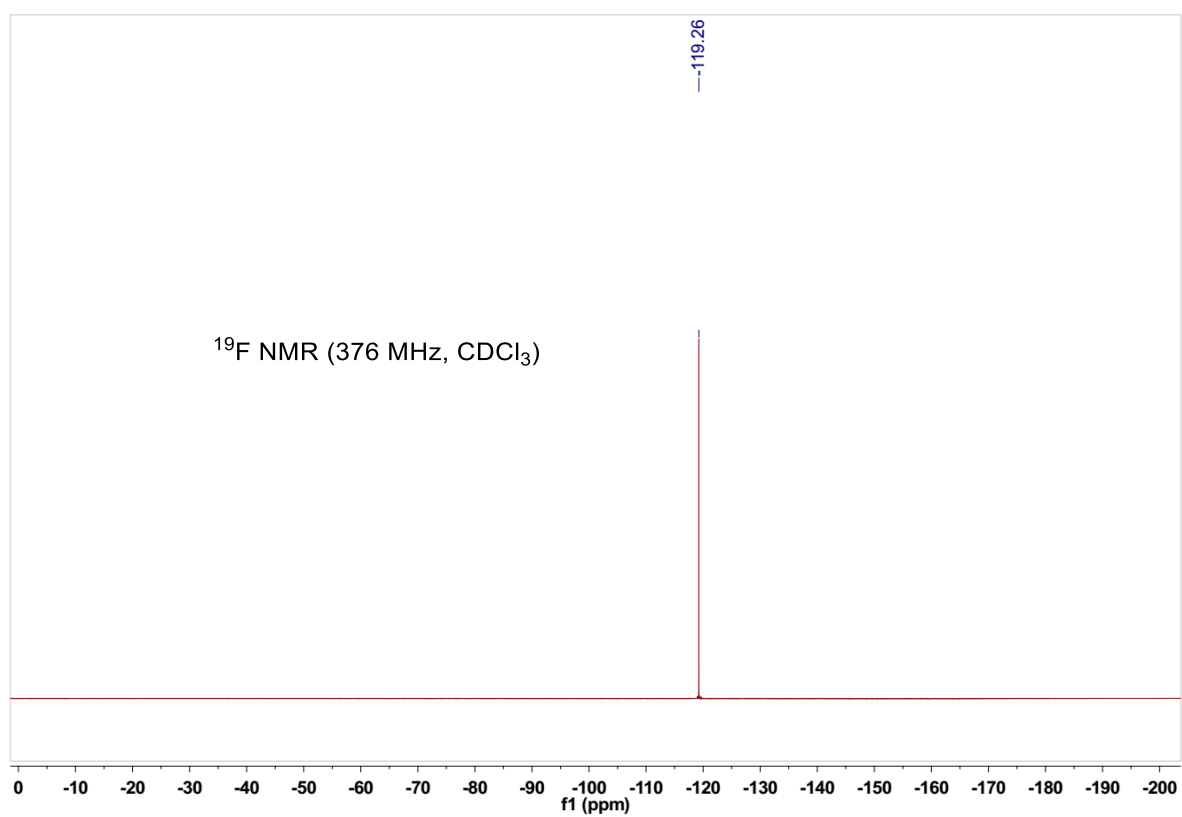

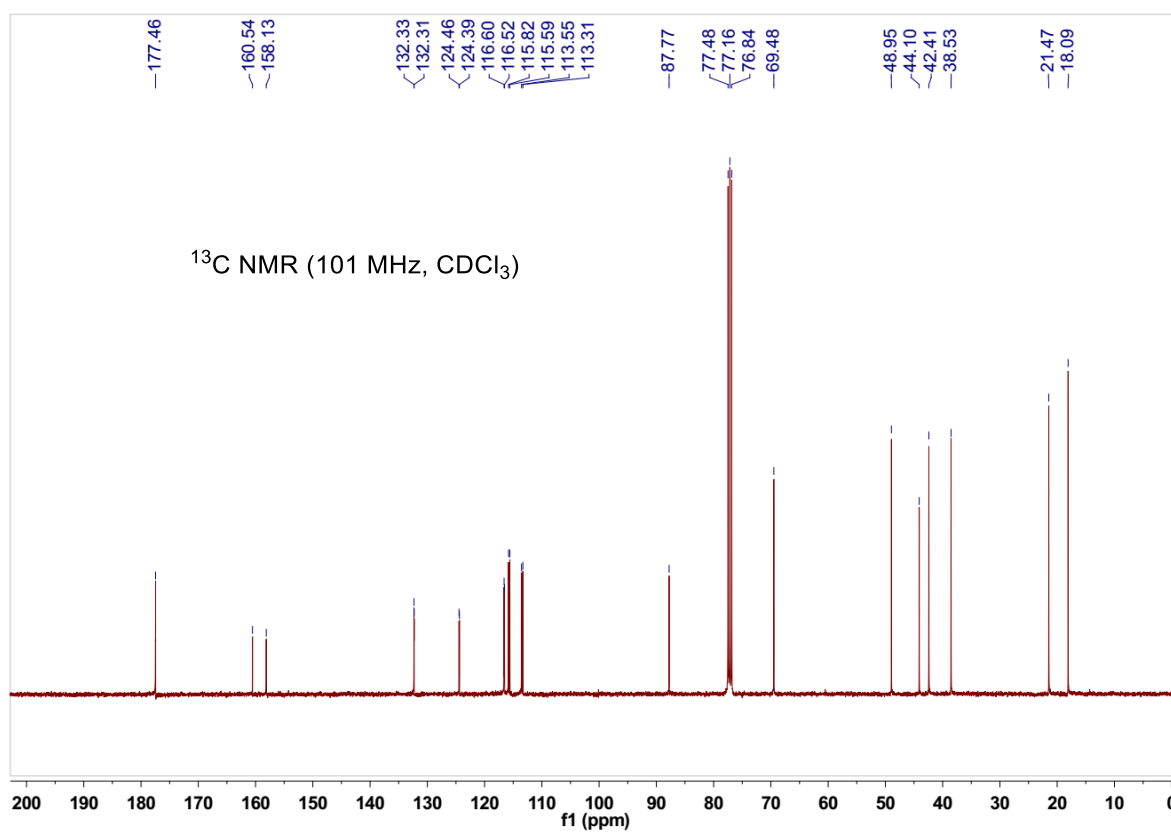



**(3a*S*,4a*R*,10b*S*)-9-chloro-3a,4a-dimethyl-3,3a,4,4a-tetrahydro-2*H*-furo[2',3':2,3]cyclobuta[1,2-*c*]quinolin-5(6*H*)-one (7j):**

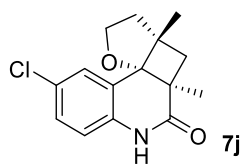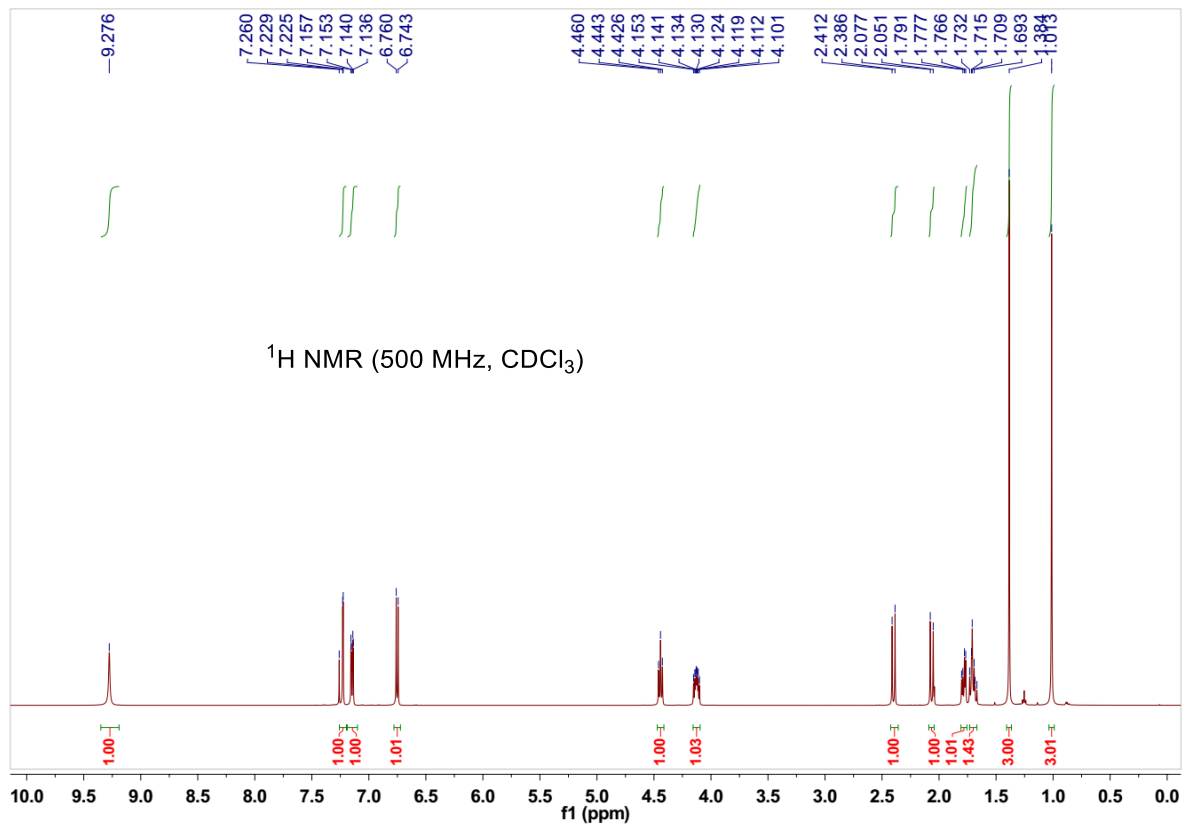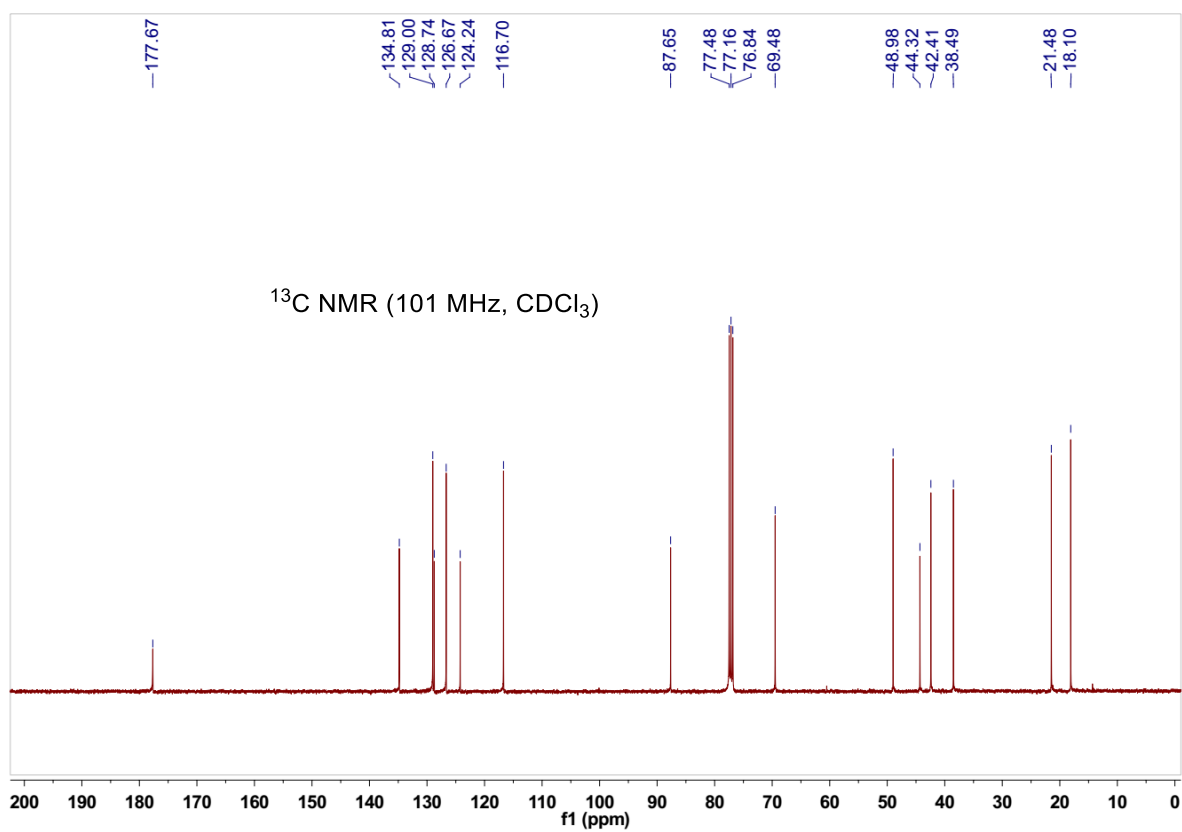

(3a*S*,4a*R*,10b*S*)-3a,4a-dimethyl-5-oxo-3,3a,4,4a,5,6-hexahydro-2*H*-furo[2',3':2,3]cyclobuta[1,2-*c*]quinoline-9-carbonitrile (7k):

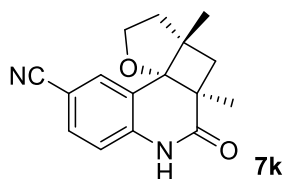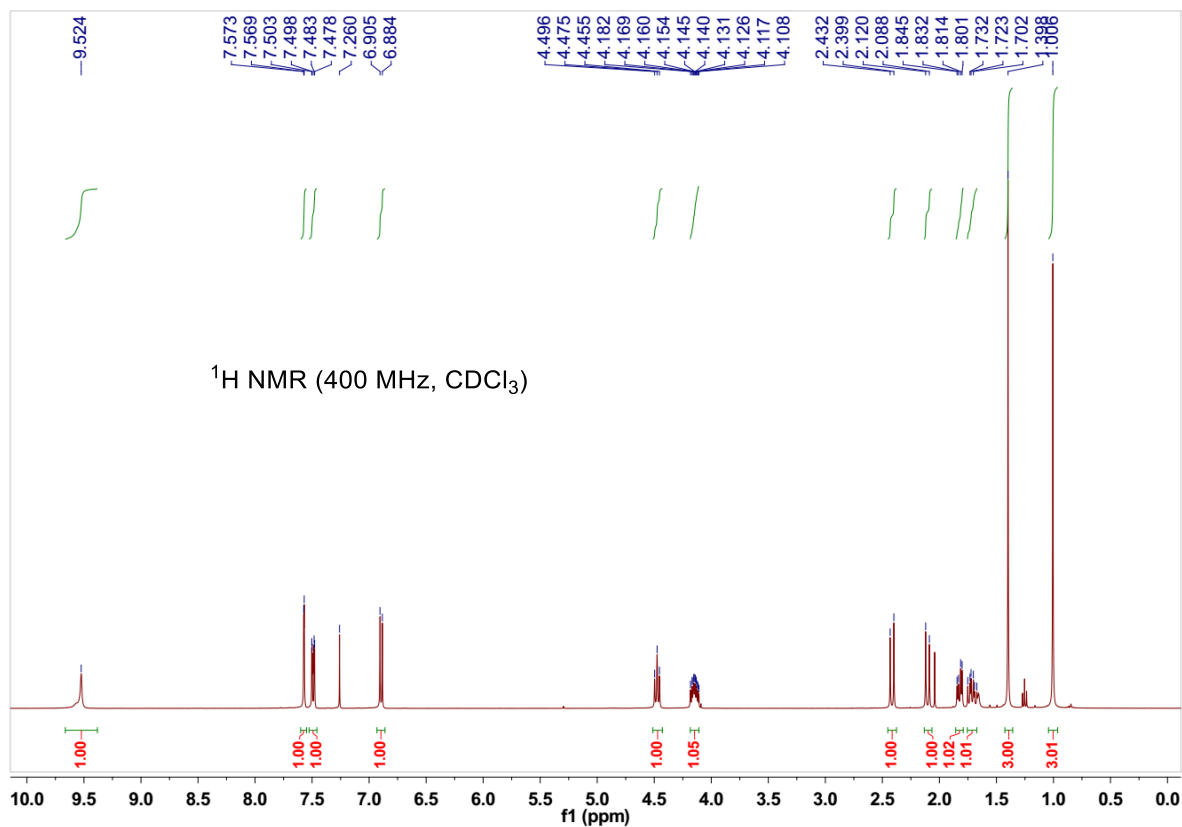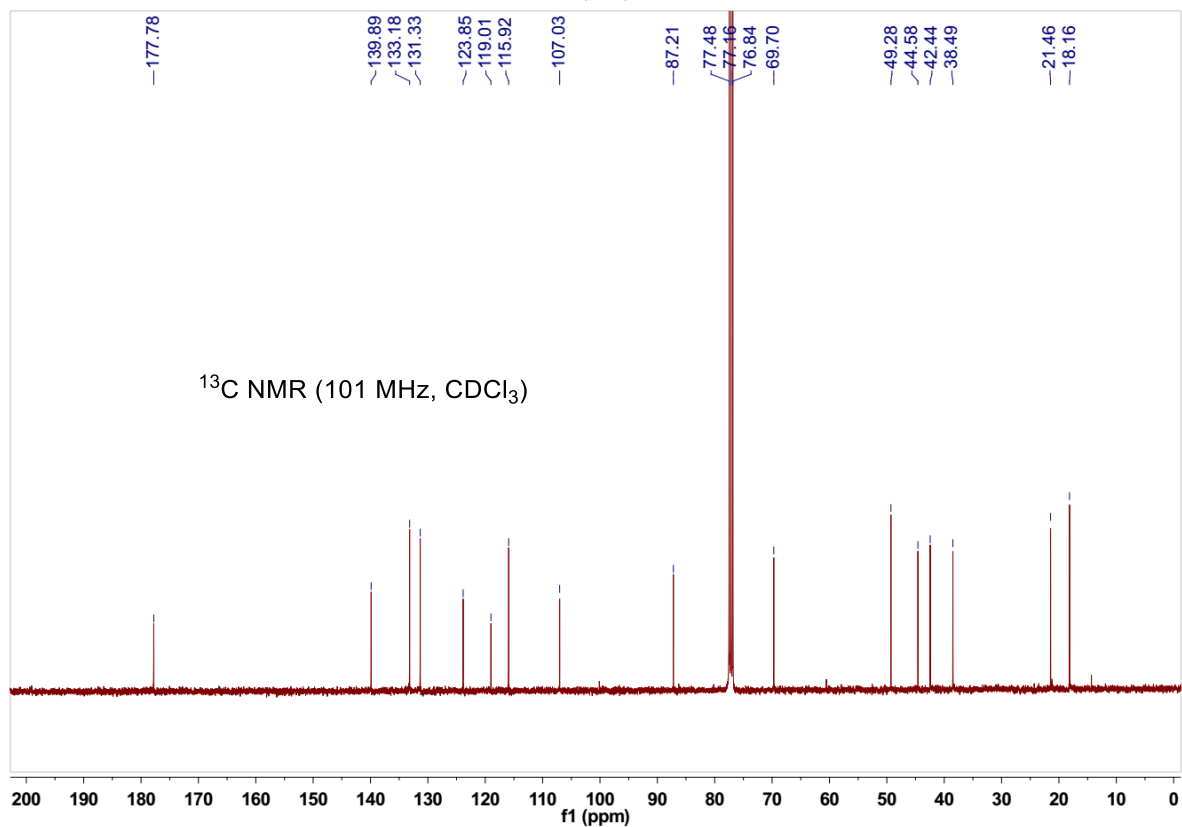

(3a*S*,4a*R*,10b*S*)-3a,4a,8-trimethyl-3,3a,4,4a-tetrahydro-2*H*-furo[2',3':2,3]cyclobuta[1,2-*c*]quinolin-5(6*H*)-one (71):

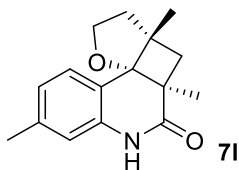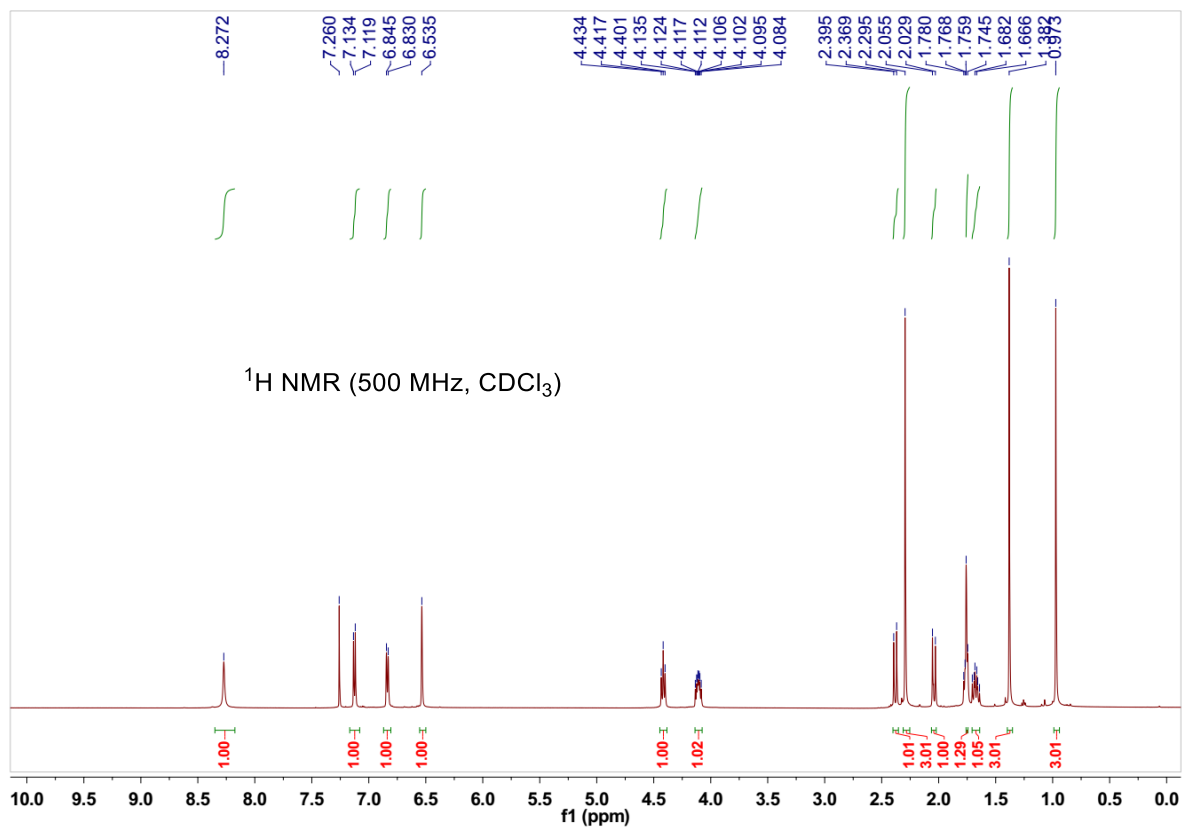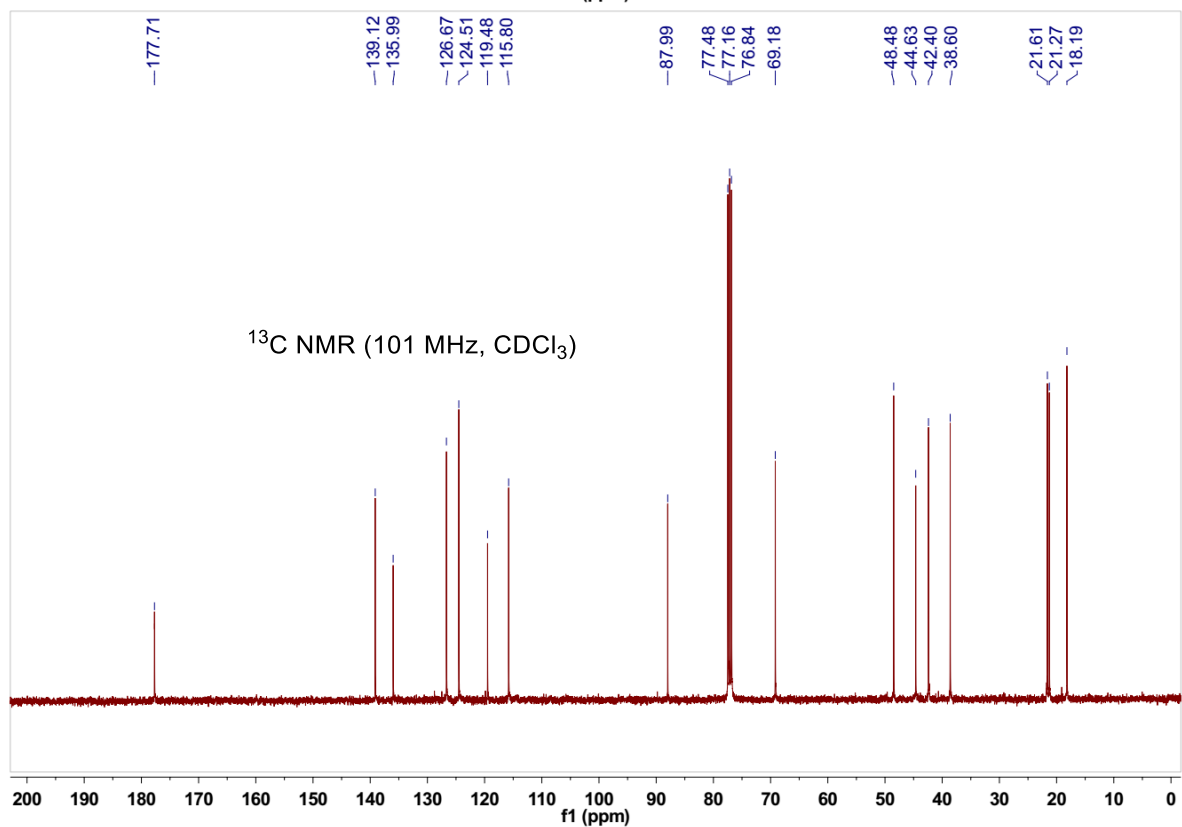

**(3a*S*,4a*R*,10b*S*)-4a-ethyl-3a-methyl-3,3a,4,4a-tetrahydro-2*H*-furo[2',3':2,3]cyclobuta[1,2-*c*]quinolin-5(6*H*)-one (7m):**

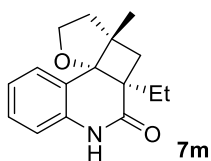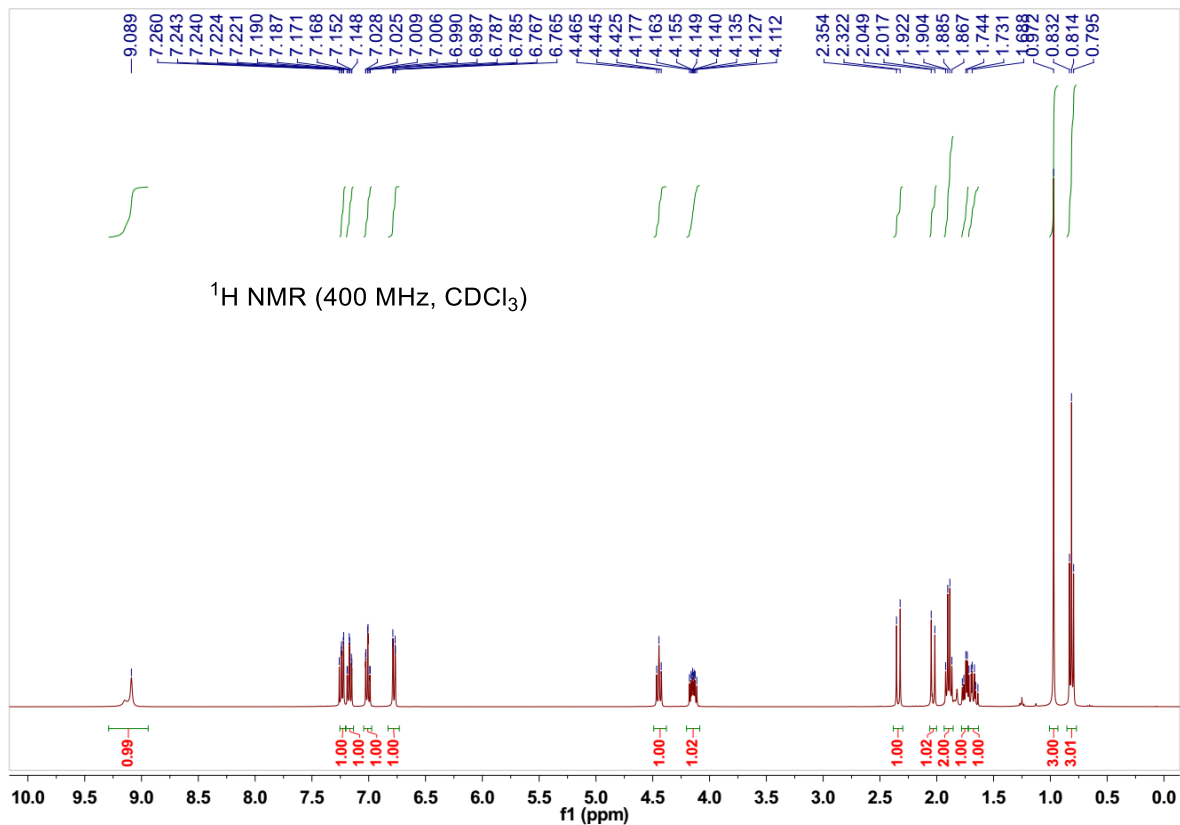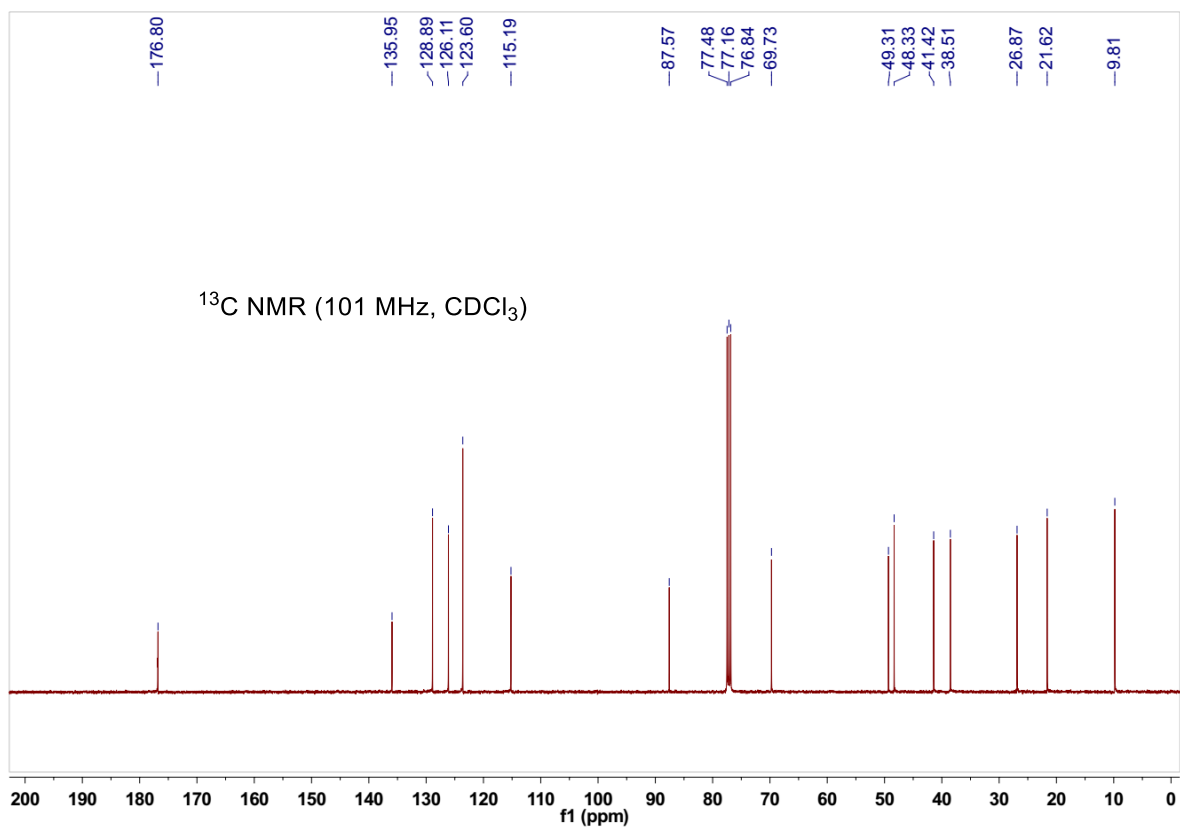

(3a*S*,4a*R*,10b*S*)-8-fluoro-3a,4a-dimethyl-3,3a,4,4a-tetrahydro-2*H*-furo[2',3':2,3]cyclobuta[1,2-*c*]quinolin-5(6*H*)-one (7n):

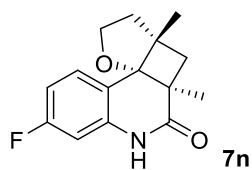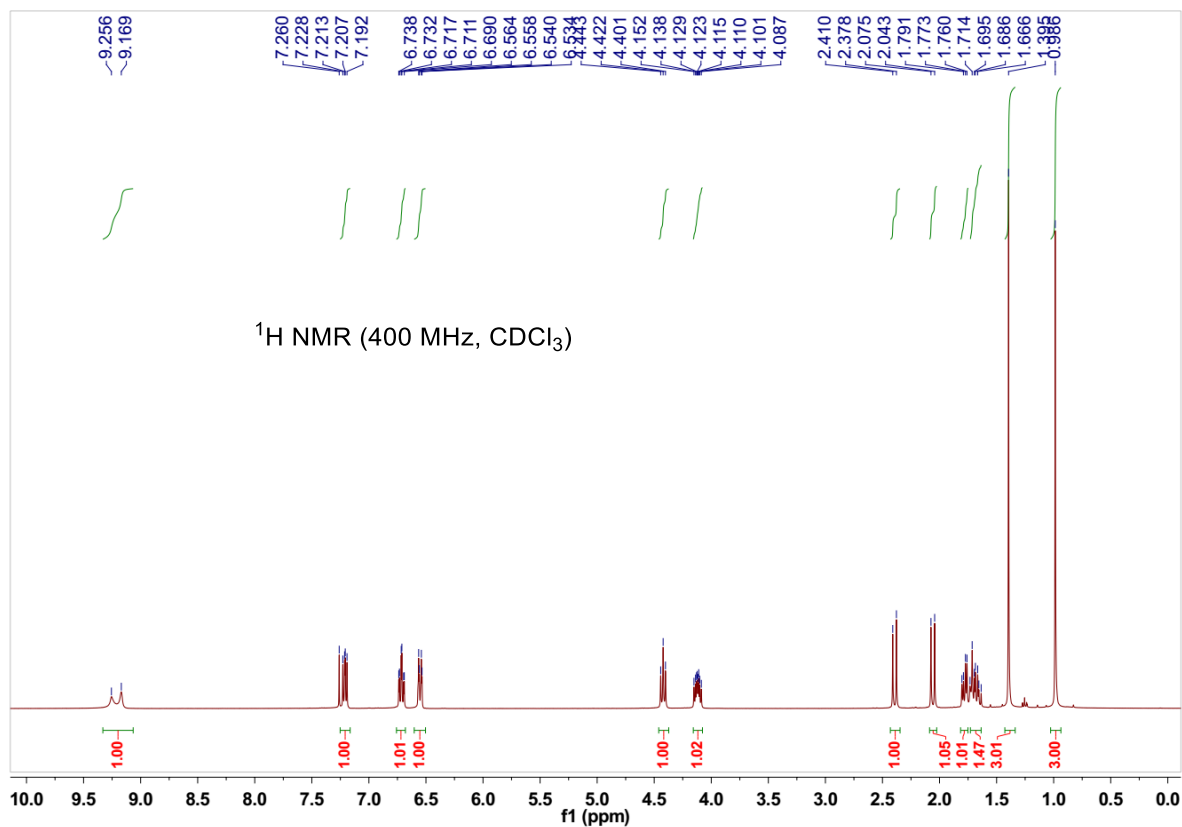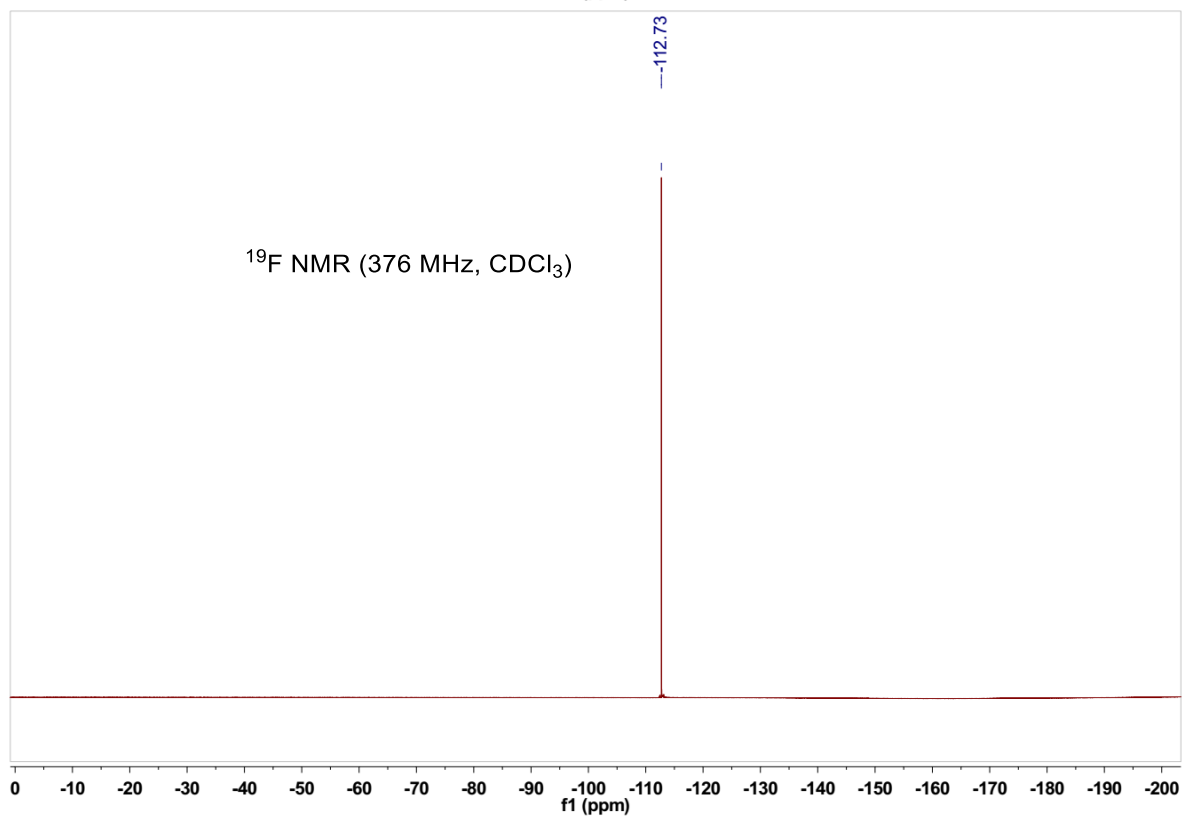

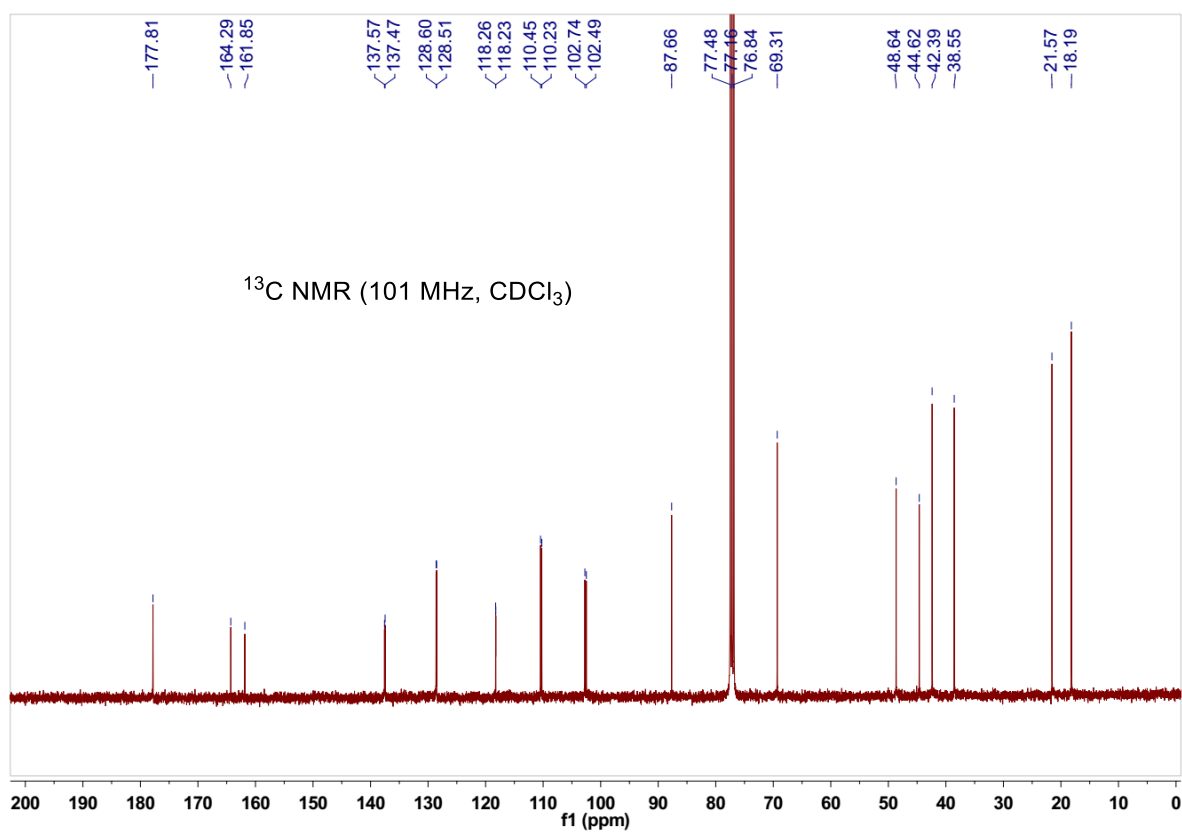

(3a*R*,4a*R*,10b*S*)-3a,4,4-trifluoro-4a-methyl-3,3a,4,4a-tetrahydro-2*H*-furo[2',3':2,3]cyclobuta[1,2-*c*]quinolin-5(6*H*)-one (**9**):

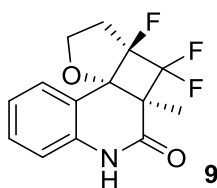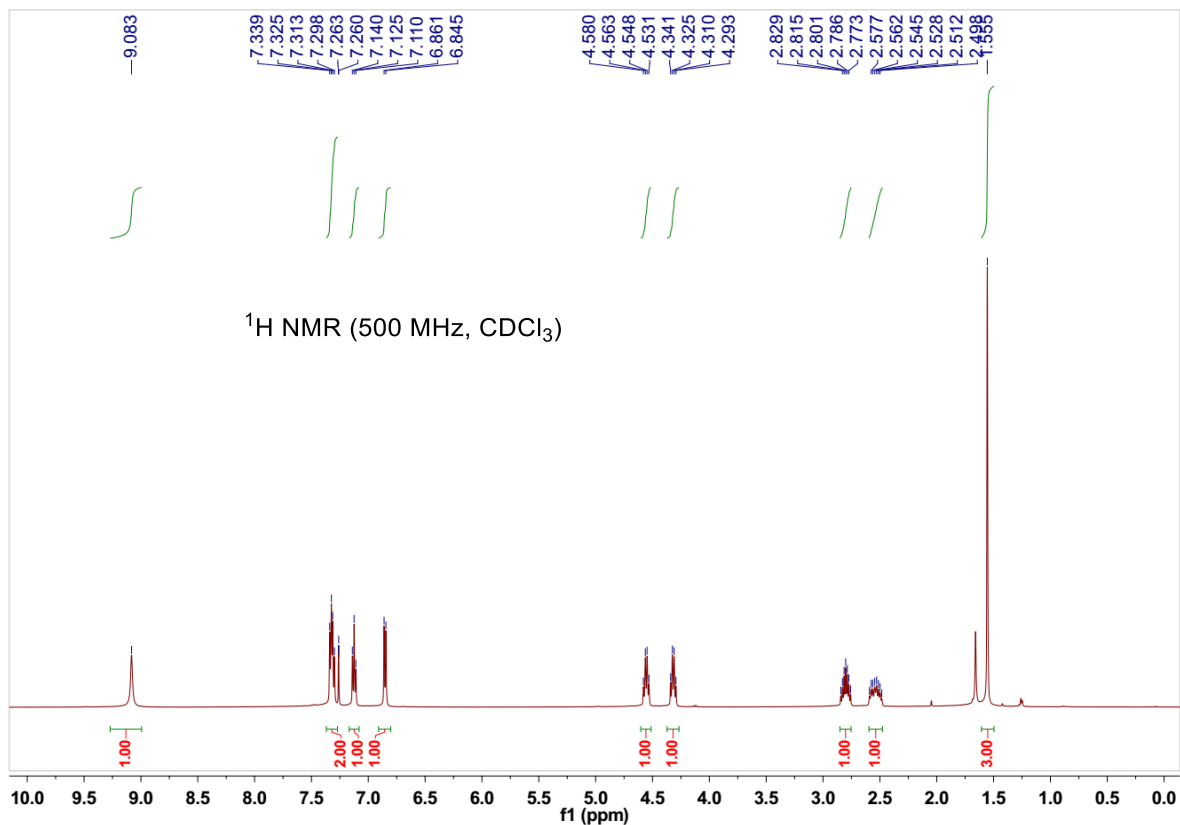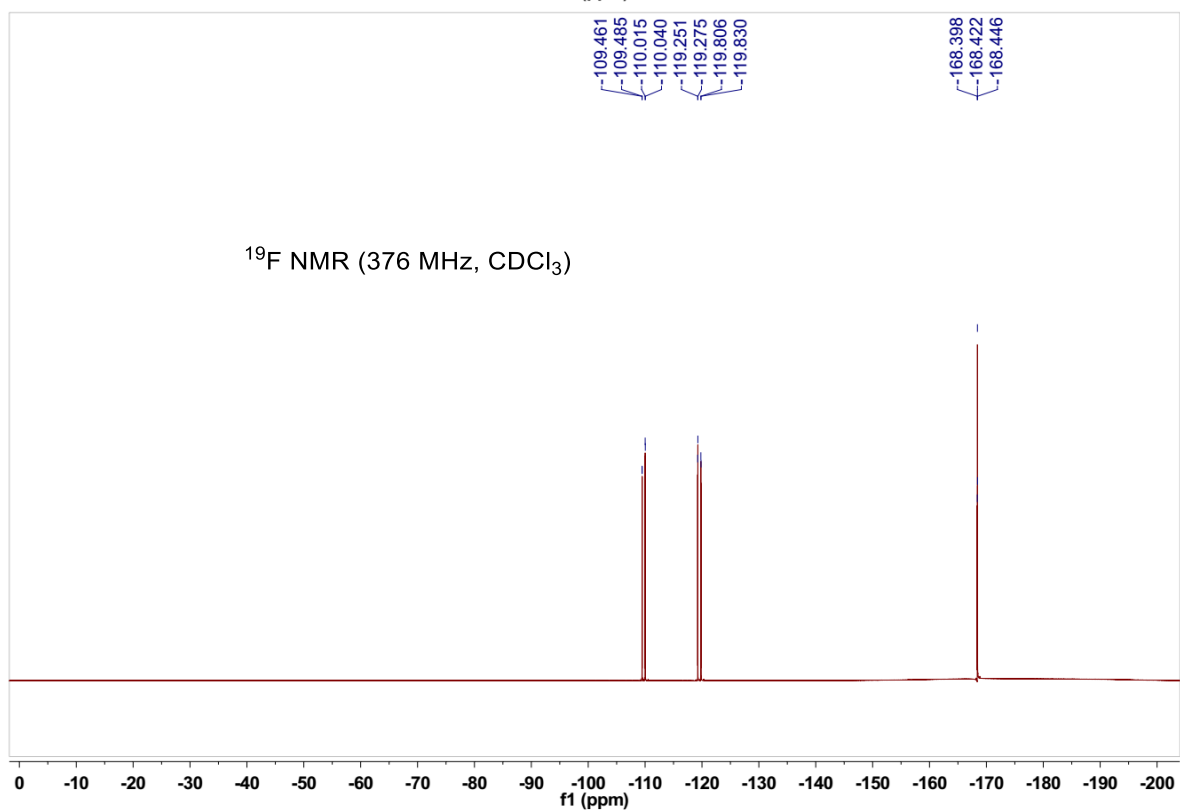

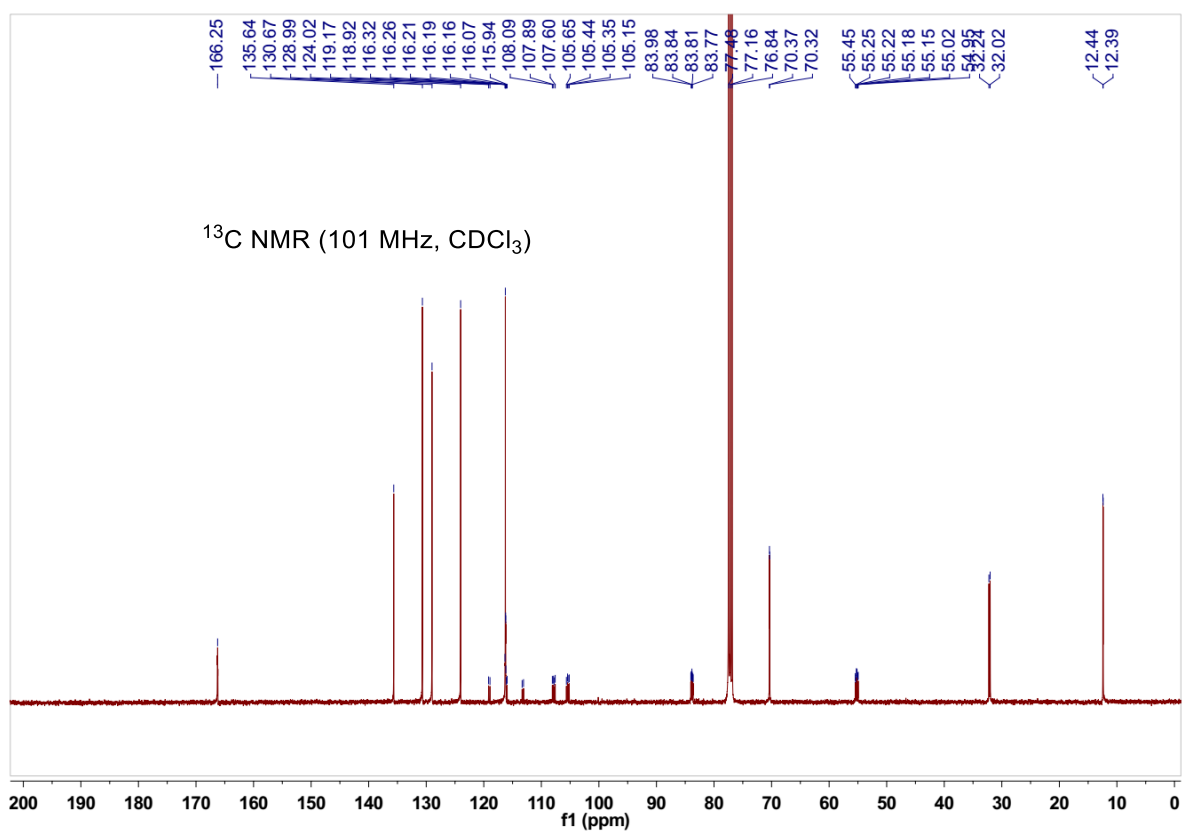



**(3a*R*,4a*R*,10b*S*)-4a-methyl-4-methylene-3,3a,4,4a-tetrahydro-2*H*-furo[2',3':2,3]cyclobuta[1,2-*c*]quinolin-5(6*H*)-one (11a):**

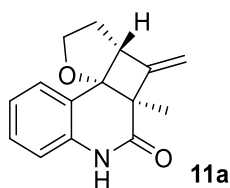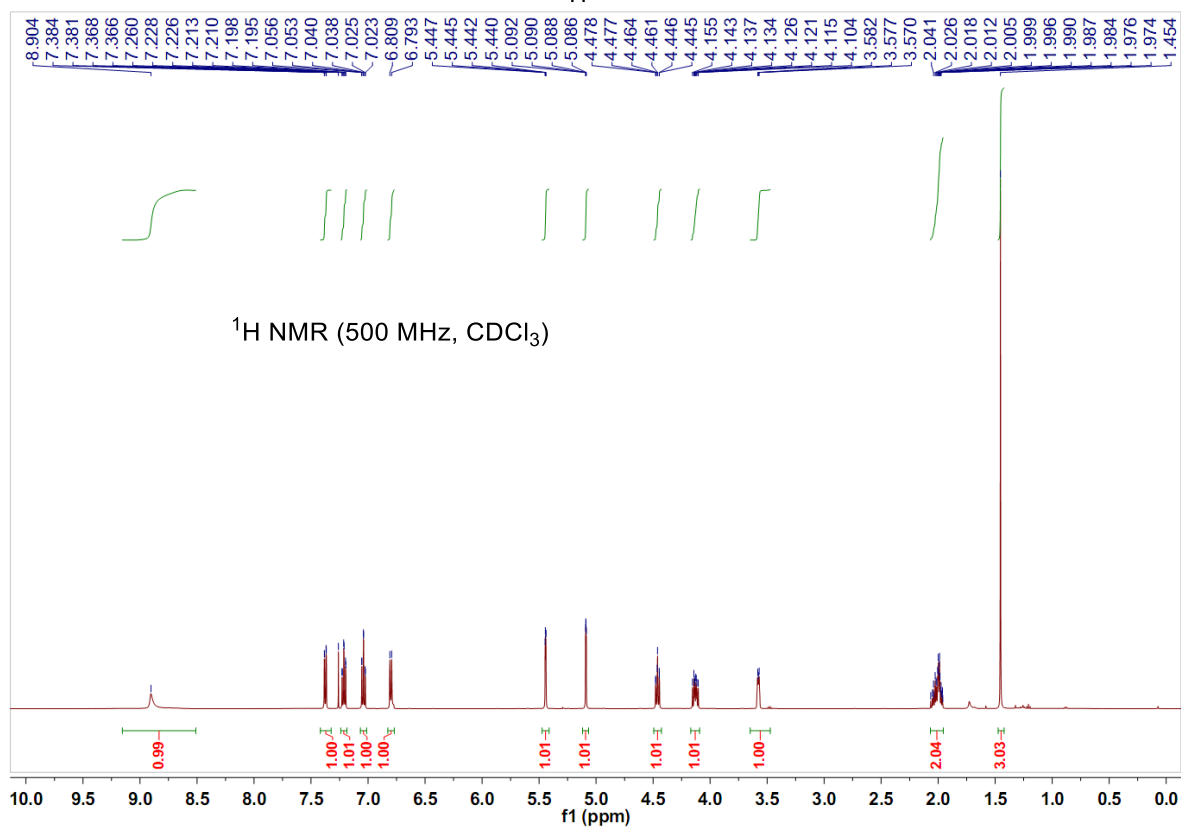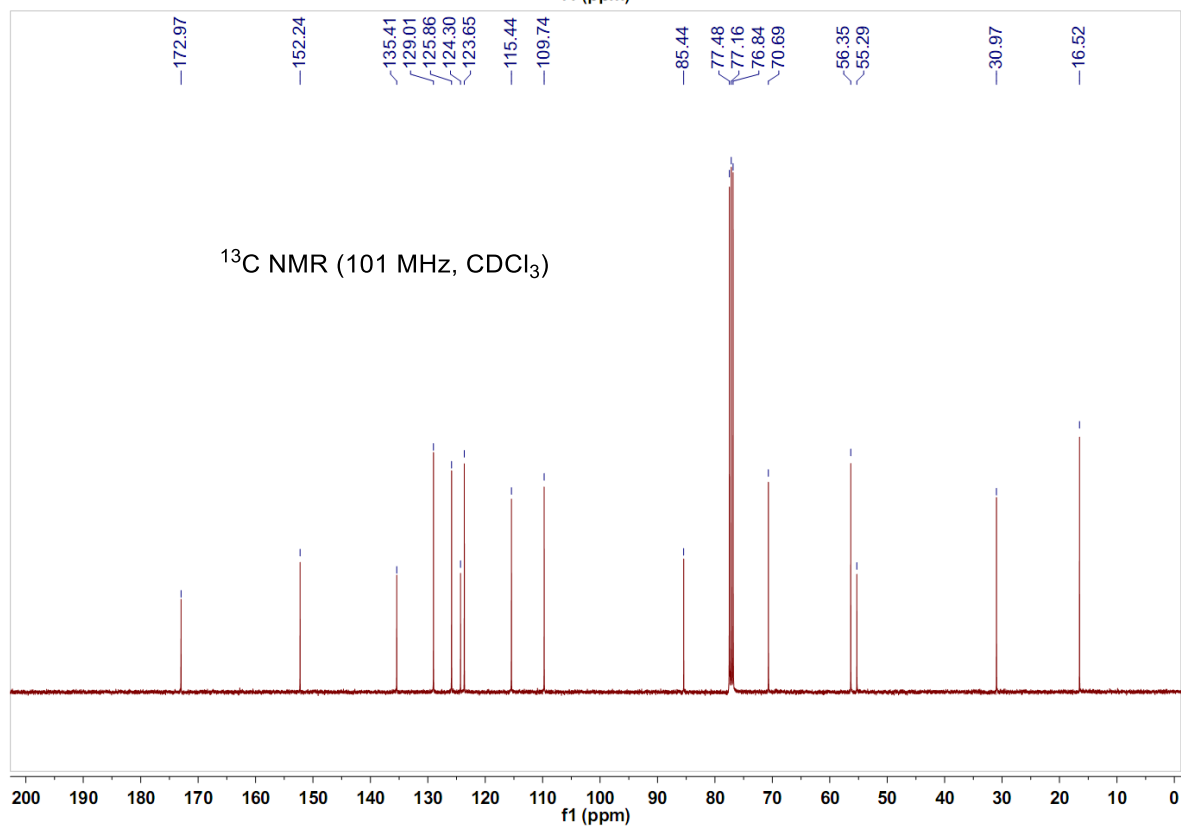

(3*aR*,4*aR*,10*bS*)-3*a*,4*a*-dimethyl-4-methylene-3,3*a*,4,4*a*-tetrahydro-2*H*-furo[2',3':2,3]cyclobuta[1,2-*c*]quinolin-5(6*H*)-one (11b):

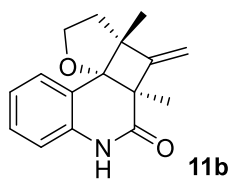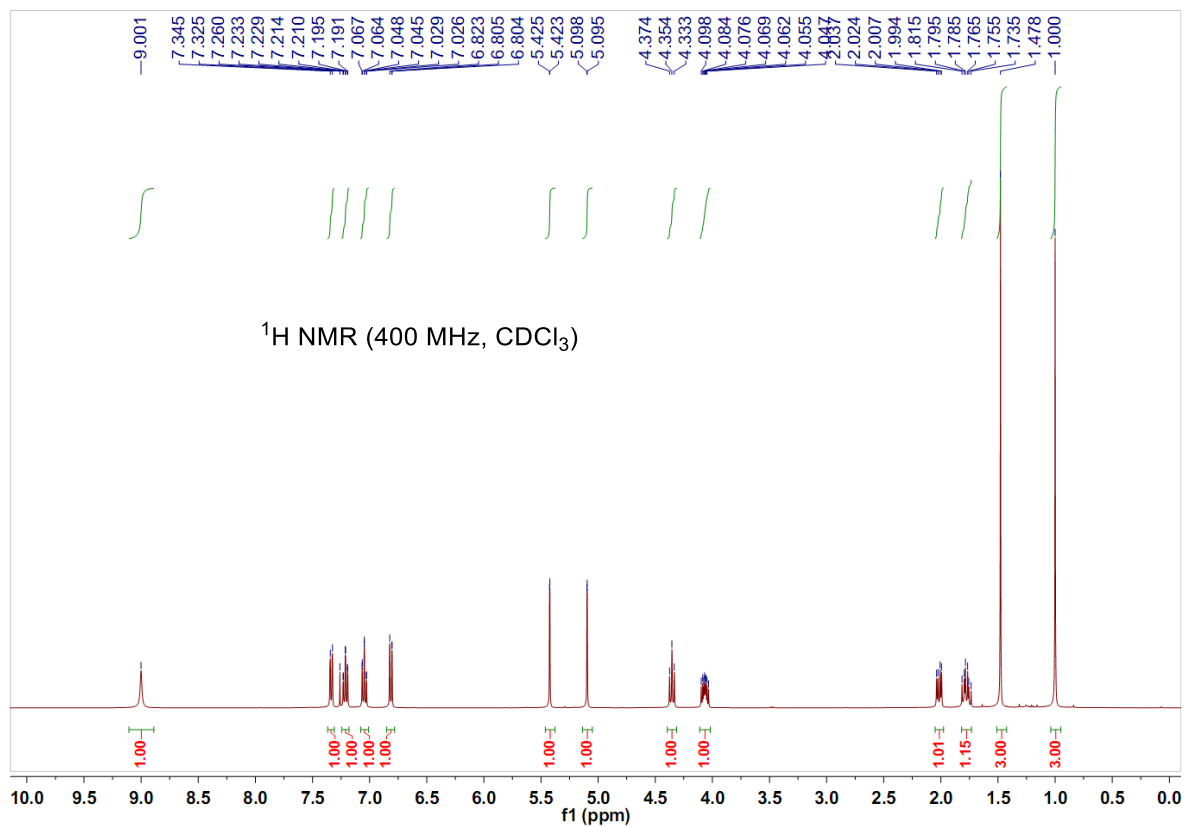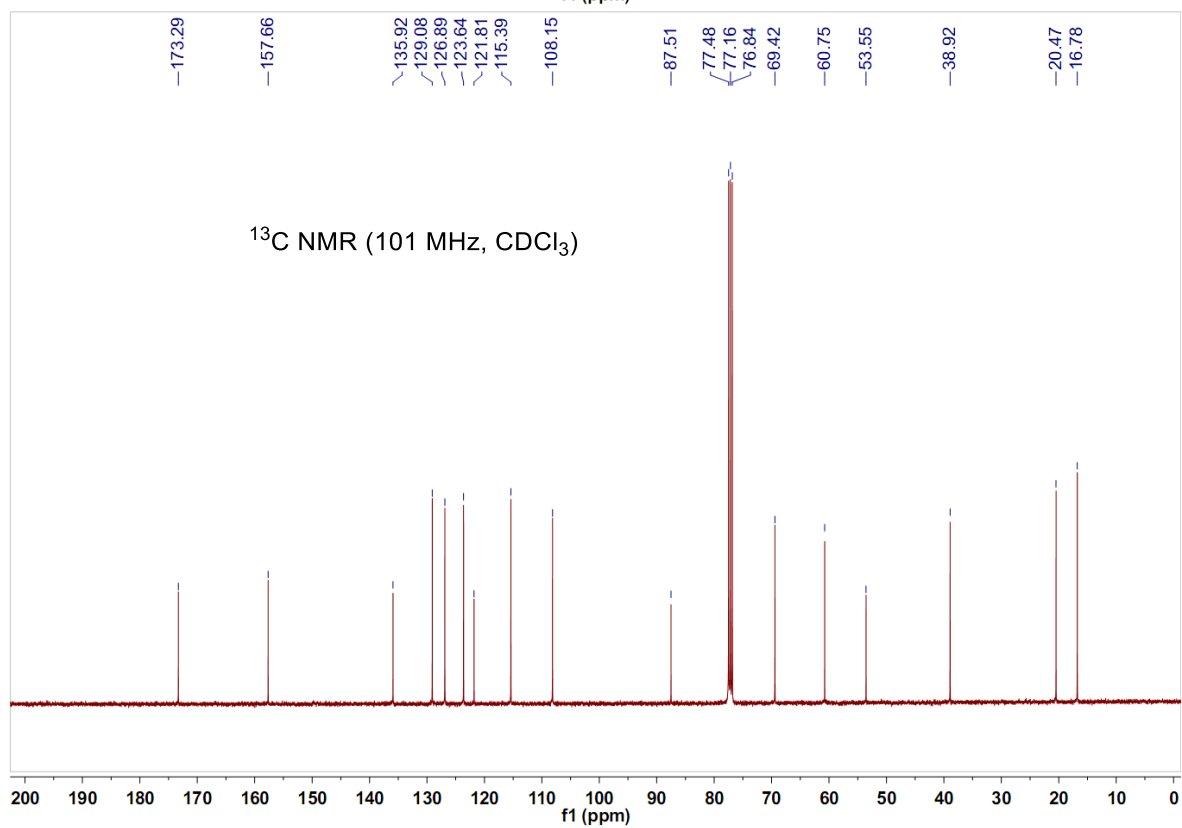

**(3a*R*,4a*R*,10b*S*)-9-chloro-3a,4a-dimethyl-4-methylene-3,3a,4,4a-tetrahydro-2*H*-furo[2',3':2,3]-cyclobuta[1,2-*c*]quinolin-5(6*H*)-one (11c):**

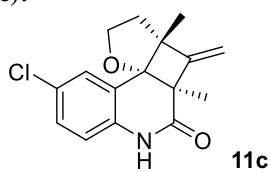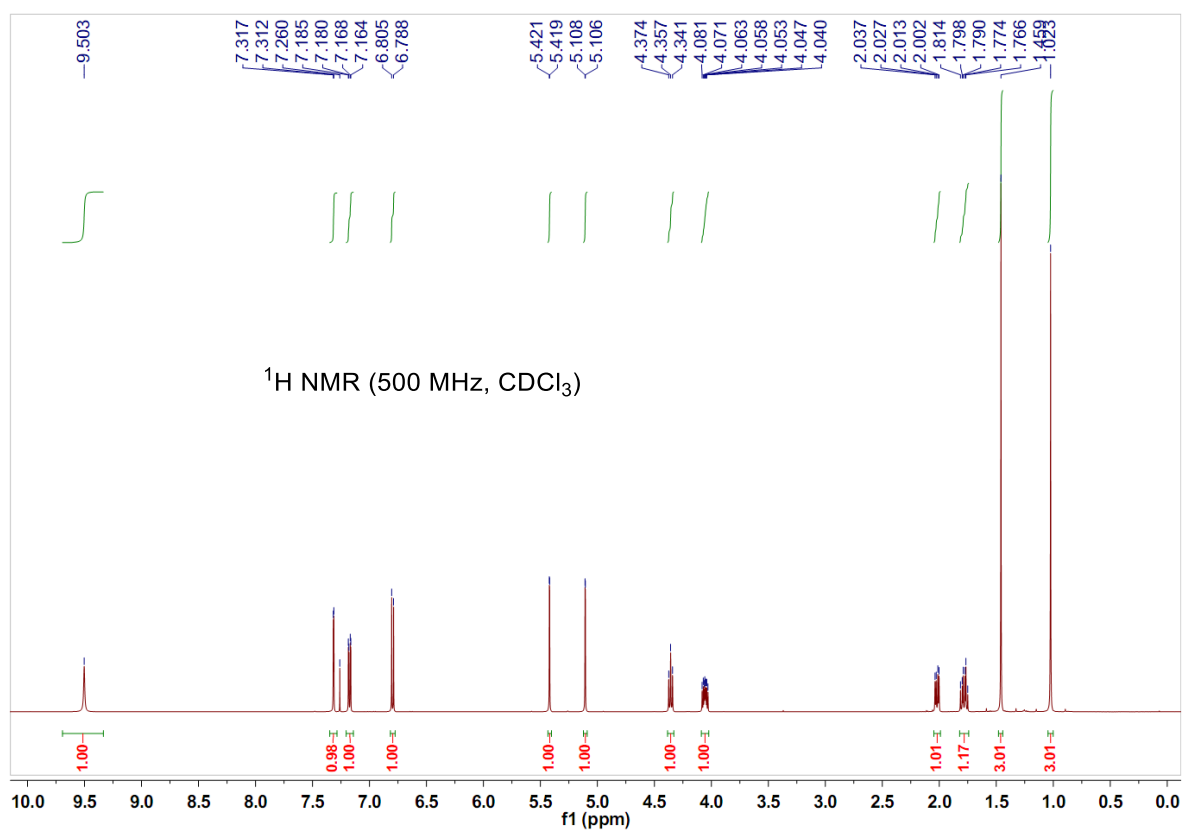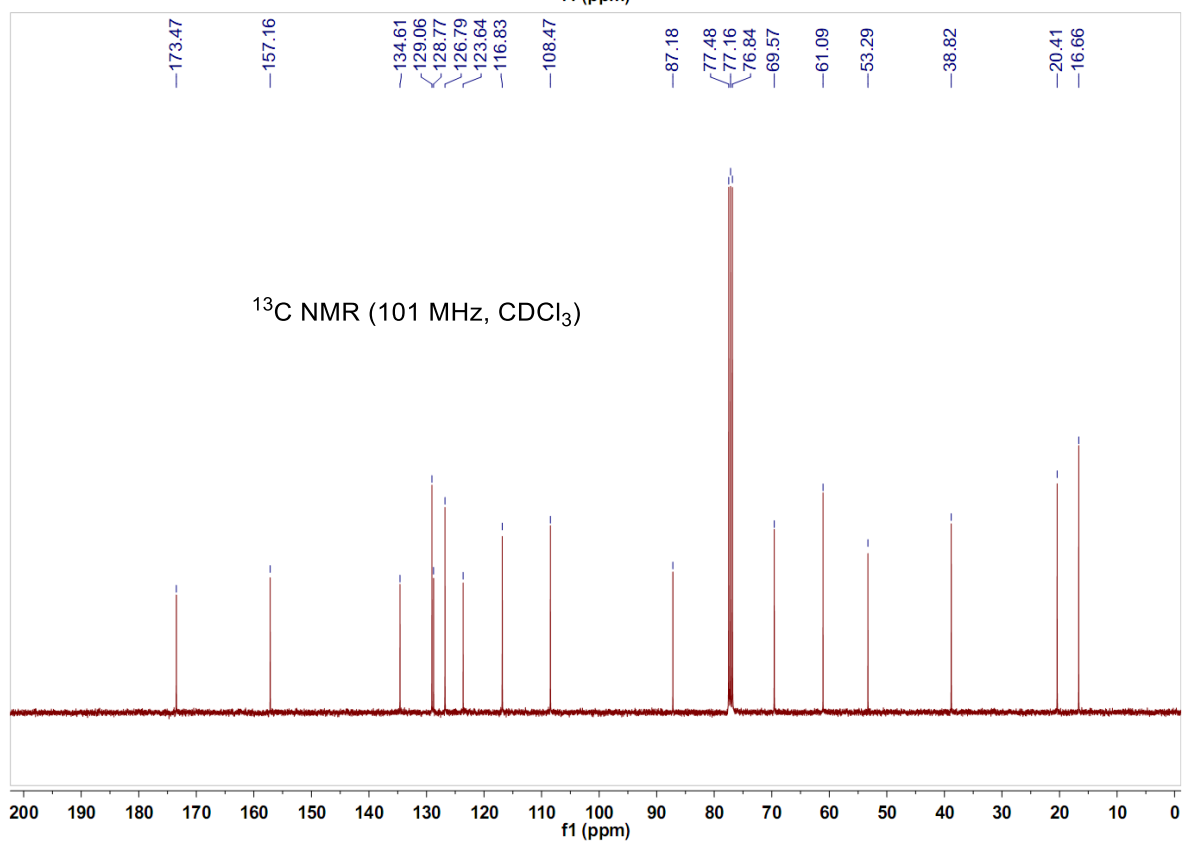

**(3a*R*,4a*R*,10b*S*)-4a-ethyl-3a-methyl-4-methylene-3,3a,4,4a-tetrahydro-2*H*-furo[2',3':2,3]cyclobuta[1,2-*c*]quinolin-5(6*H*)-one (11d):**

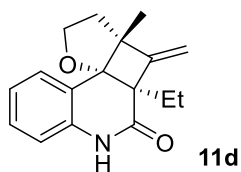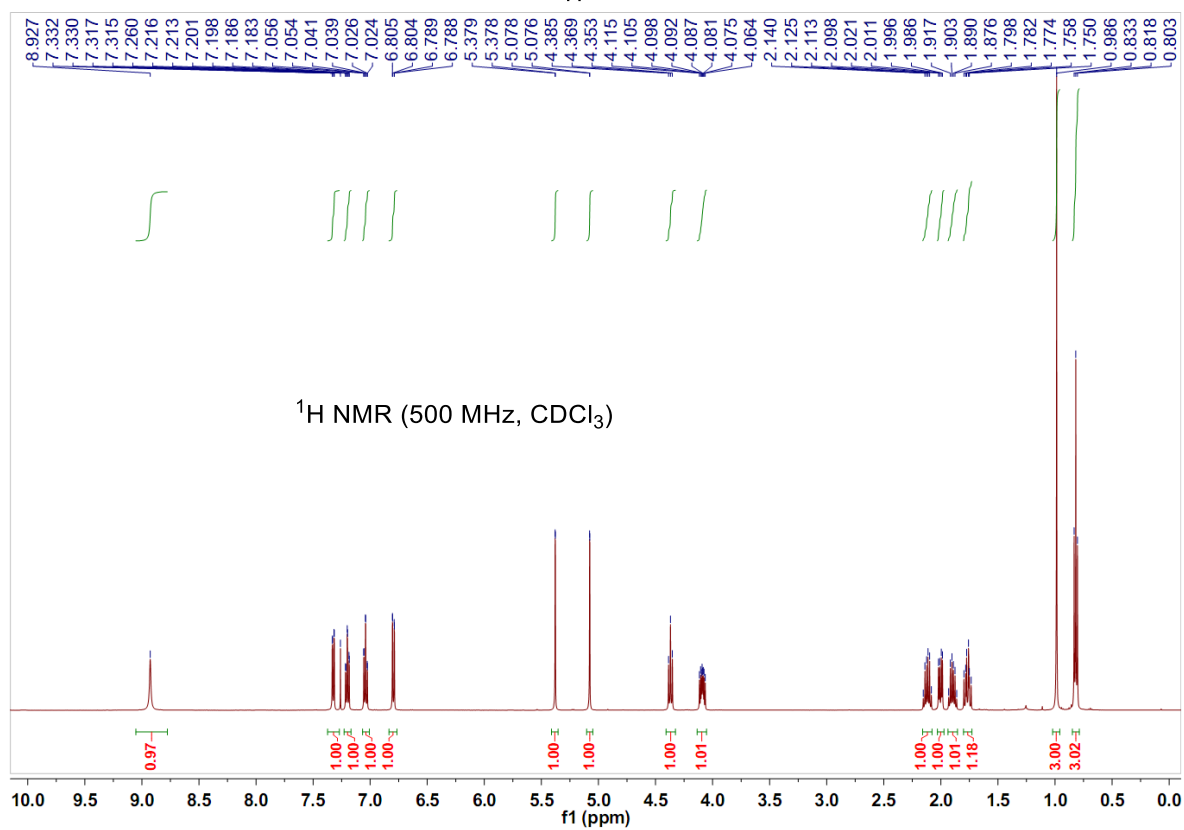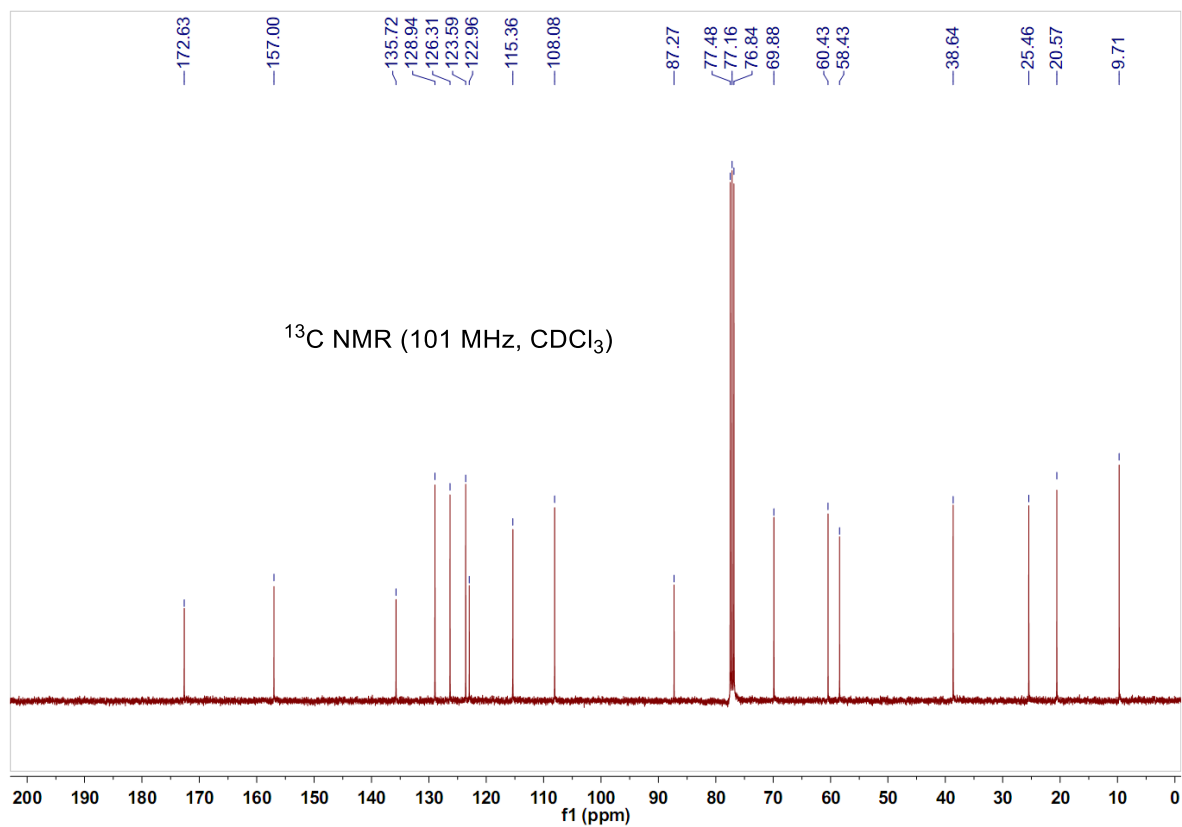

**(4a*R*,10b*S*)-9-chloro-4a-methyl-4,4a-dihydro-2*H*-furo[2',3':2,3]cyclobuta[1,2-*c*]quinolin-5(6*H*)-one (13a):**

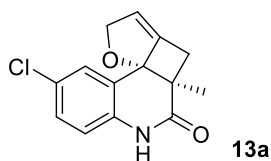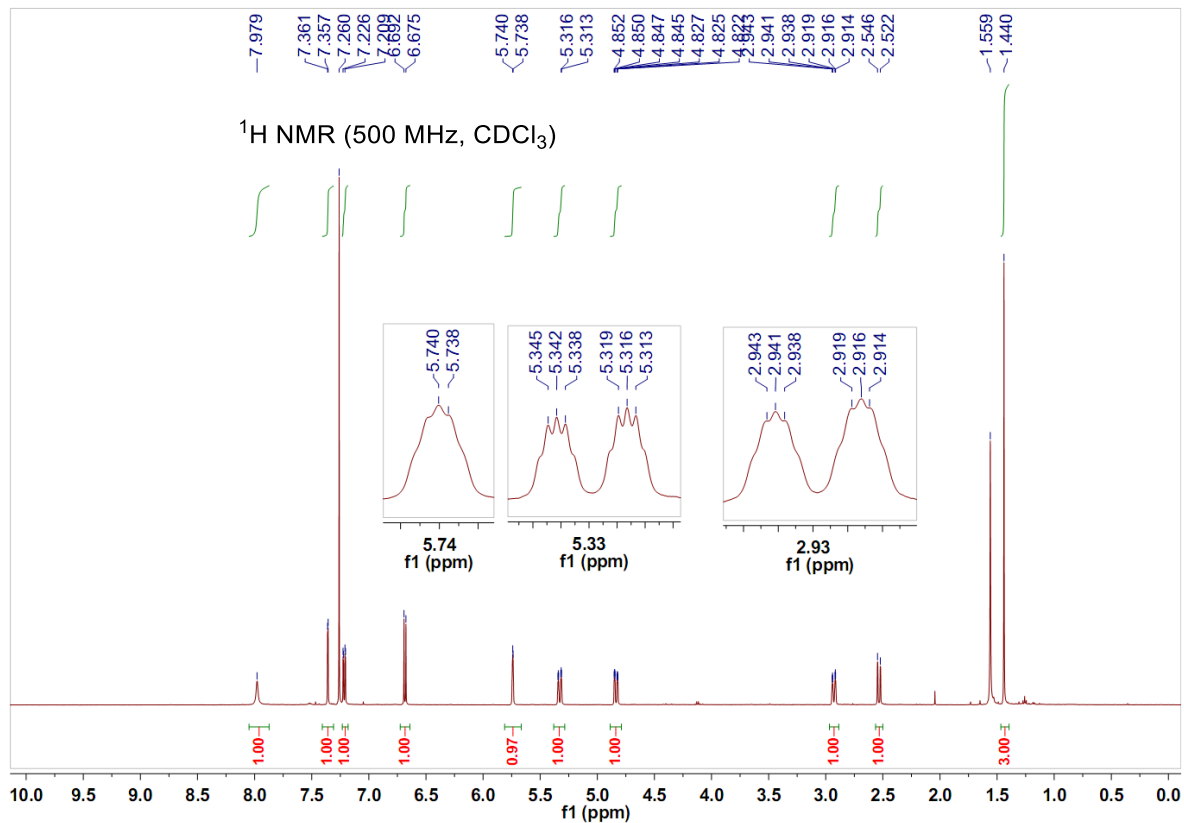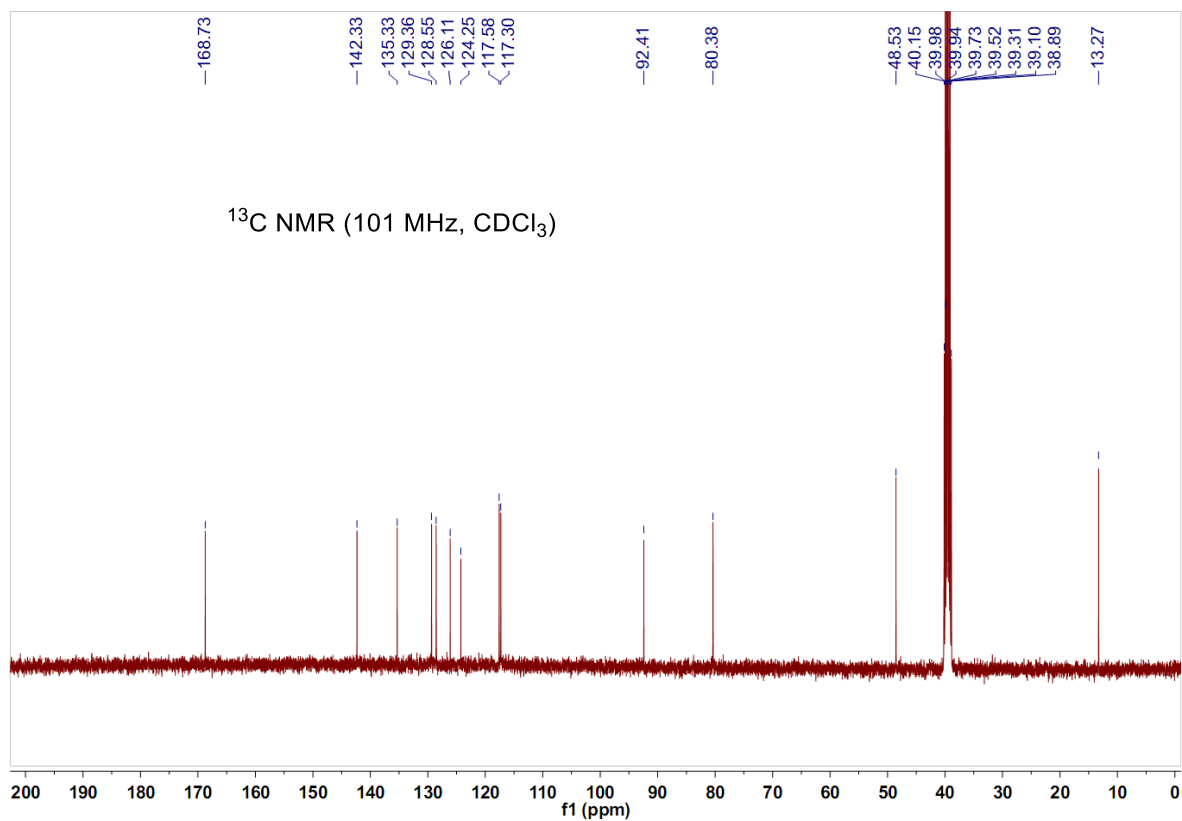

**5-methyl-4,7-dihydrobenzo[*b*]furo[2,3-*d*]azocin-6(5*H*)-one (*rac*-14b):**

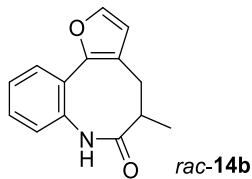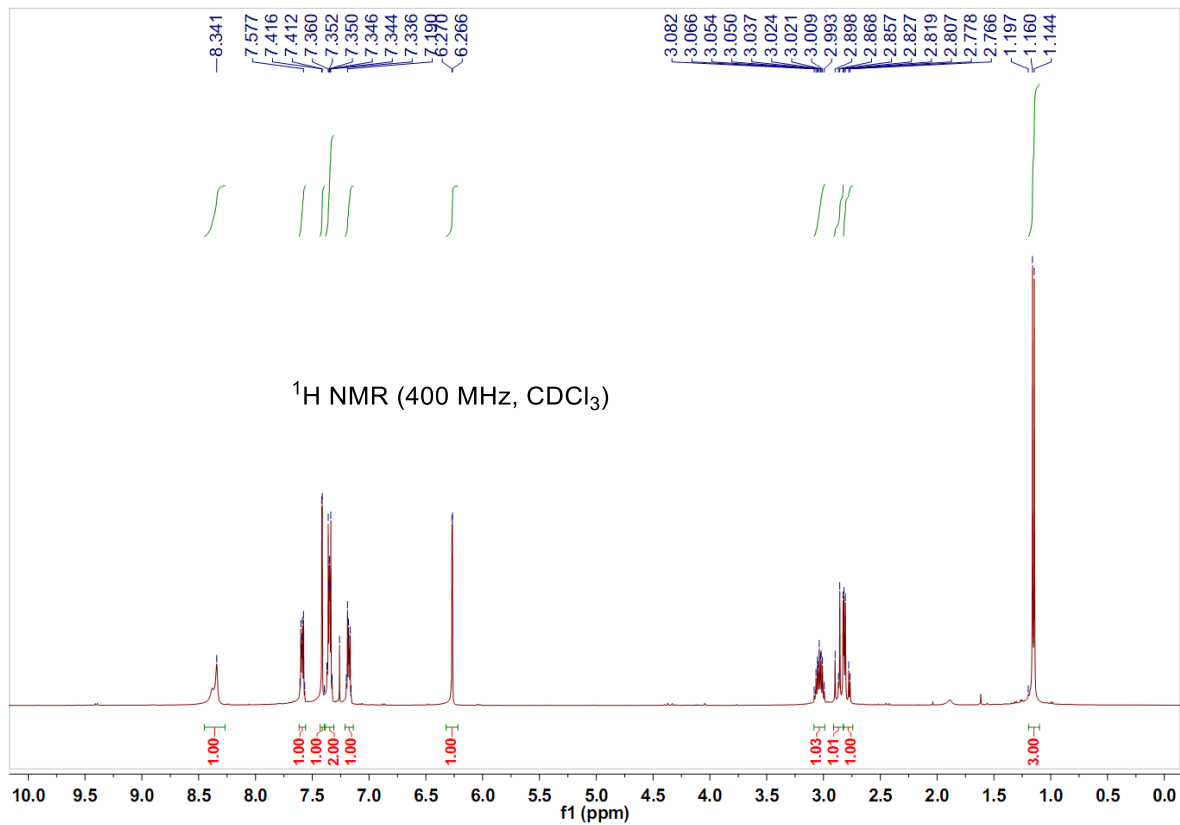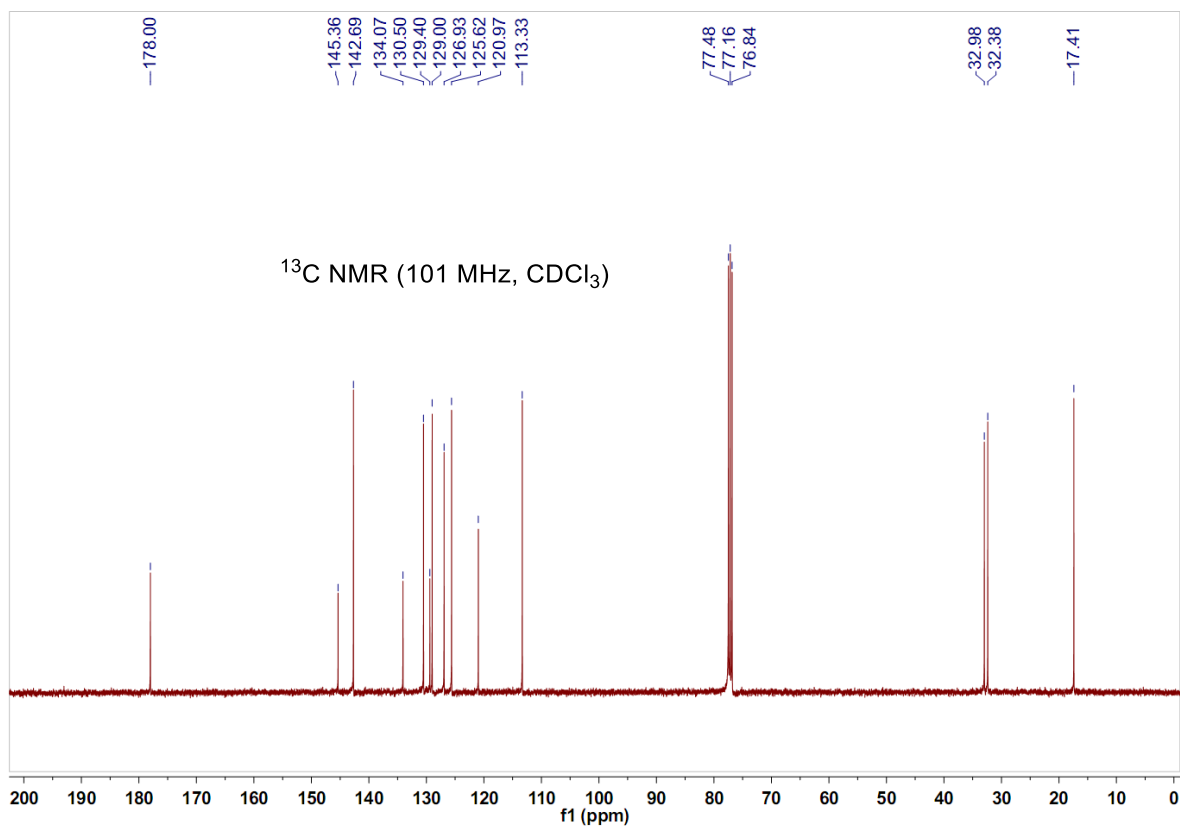

(4a*R*,10b*S*)-4,4,4a-trimethyl-4,4a-dihydro-2*H*-furo[2',3':2,3]cyclobuta[1,2-*c*]quinolin-5(6*H*)-one (16):

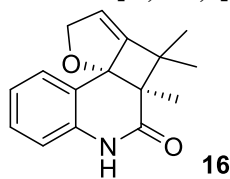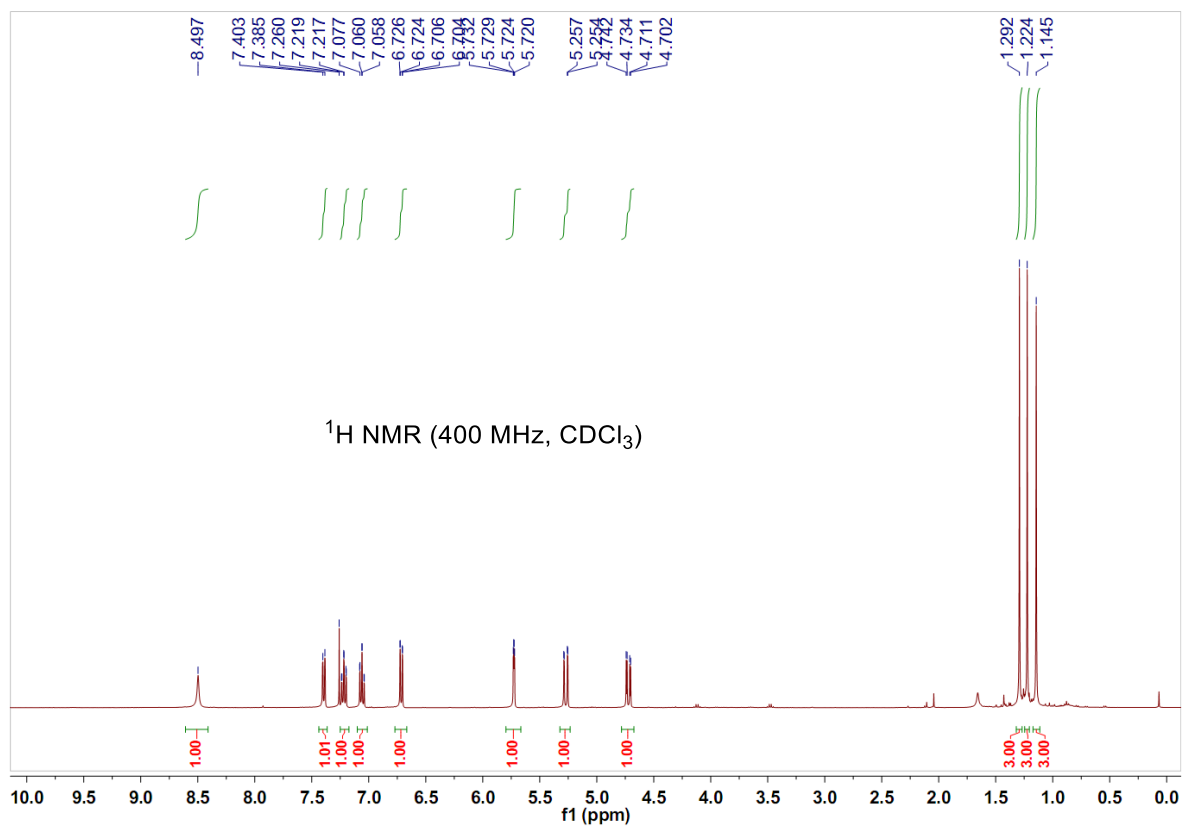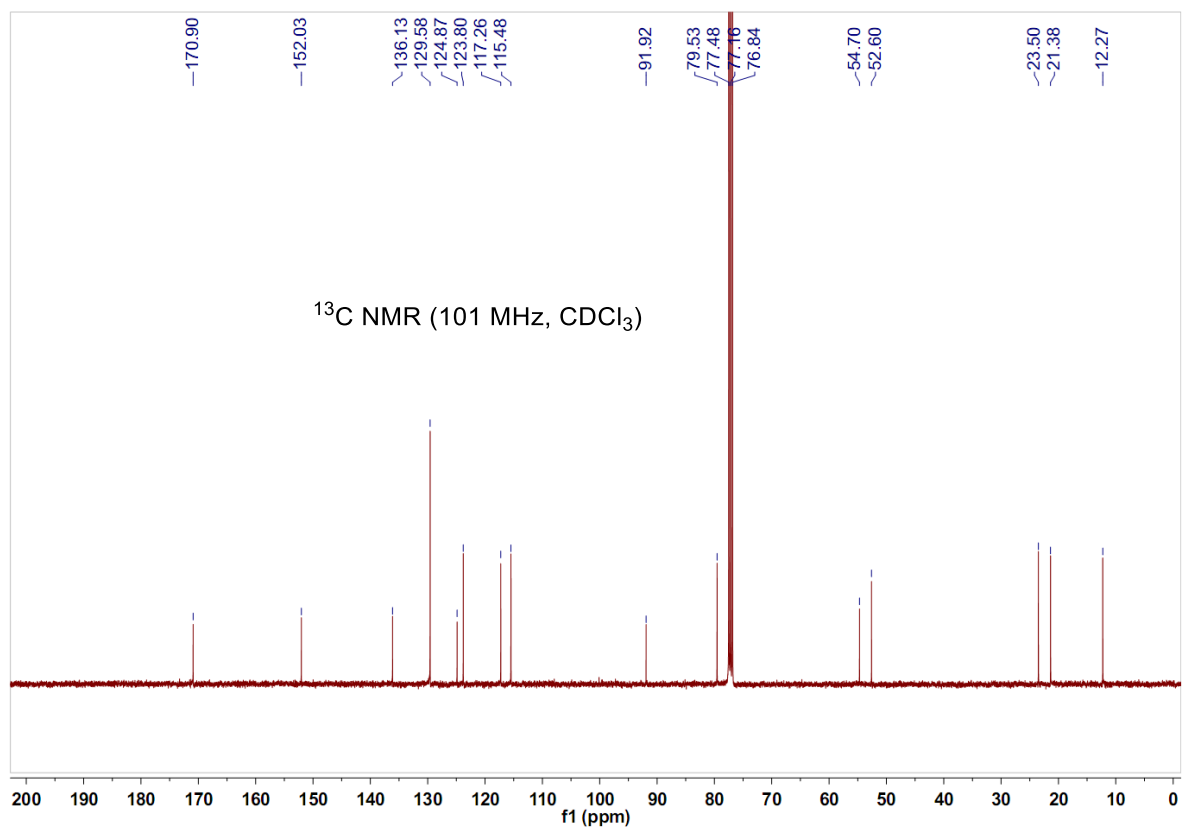

**(2*S*,3'*S*)-3'-methyl-3-(prop-1-en-2-yl)-1*H*,5*H*-spiro[furan-2,4'-quinolin]-2'(3'*H*)-one (18):**

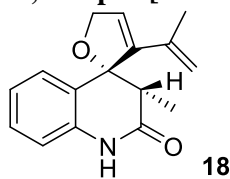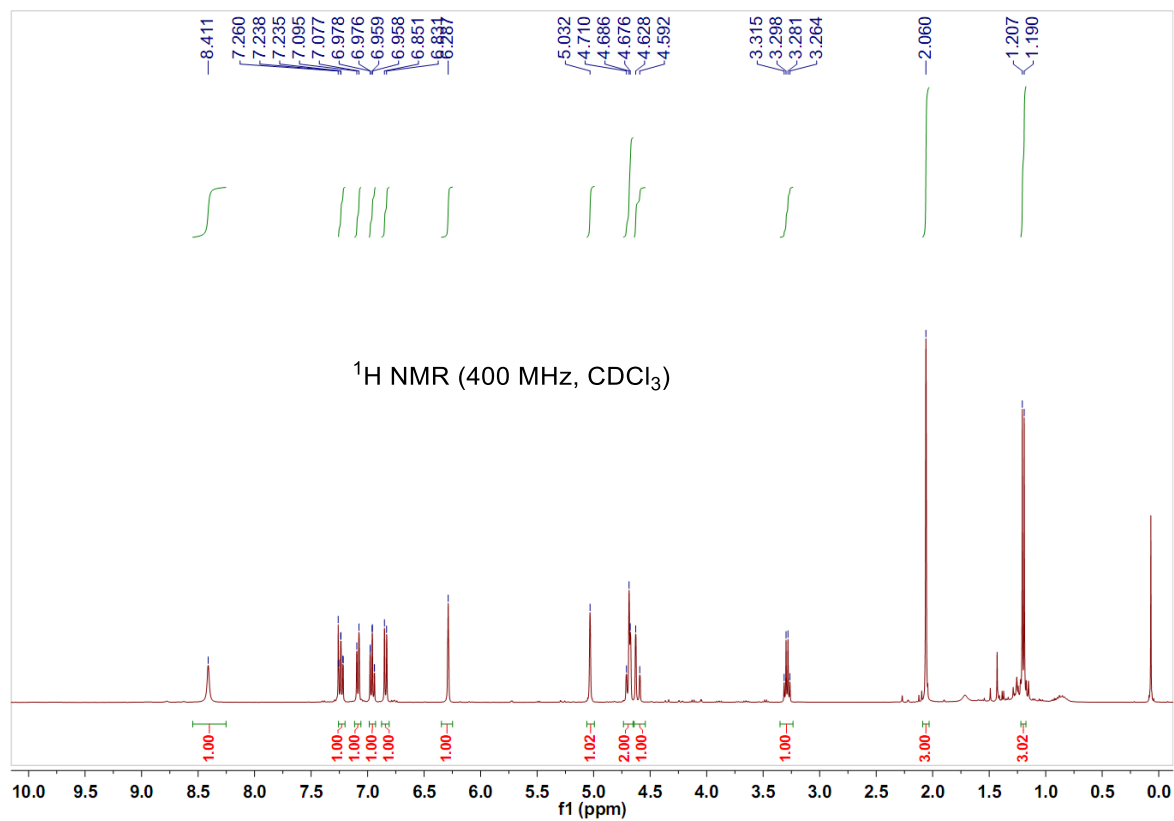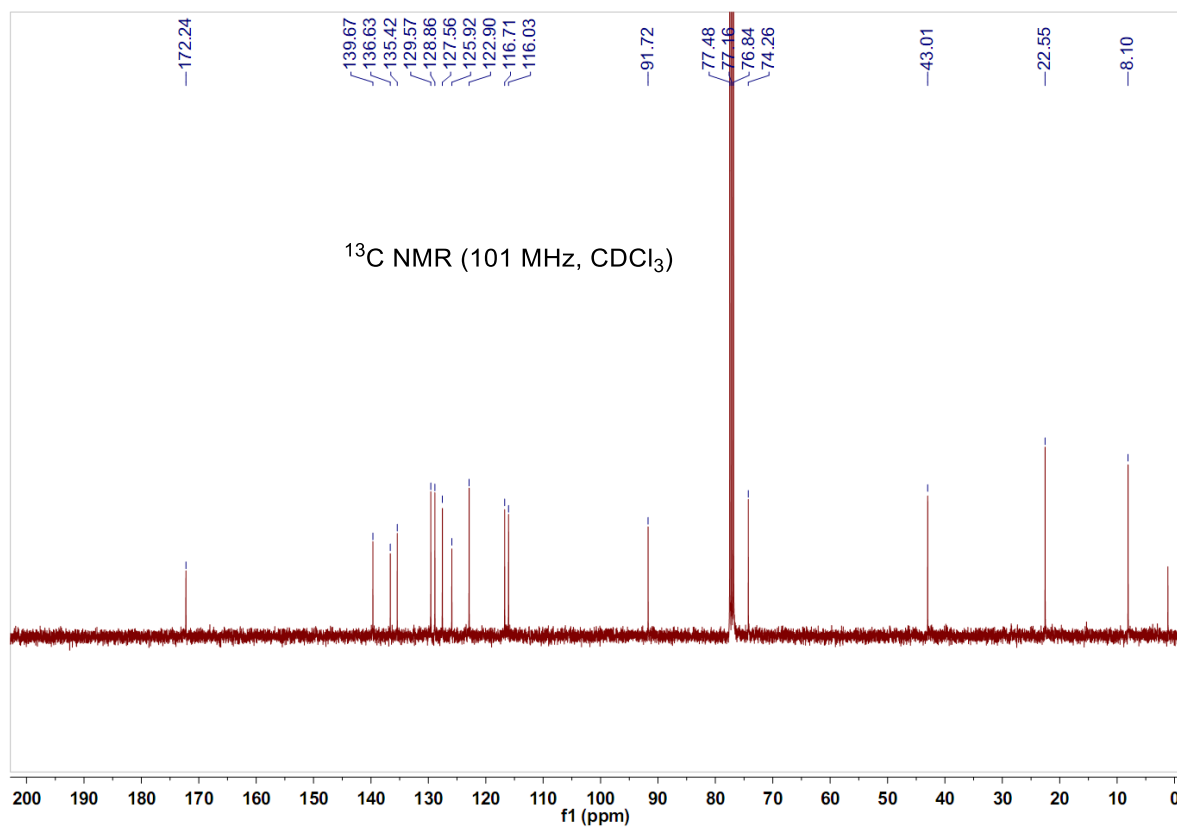



## 9. HPLC Traces

(3*aS*,4*aR*,10*bS*)-4*a*-methyl-3,3*a*,4,4*a*-tetrahydro-2*H*-furo[2',3':2,3]cyclobuta[1,2-*c*]quinolin-5(6*H*)-one (7*a*):

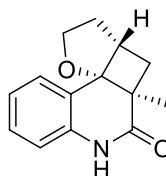

7*b*, 88% ee

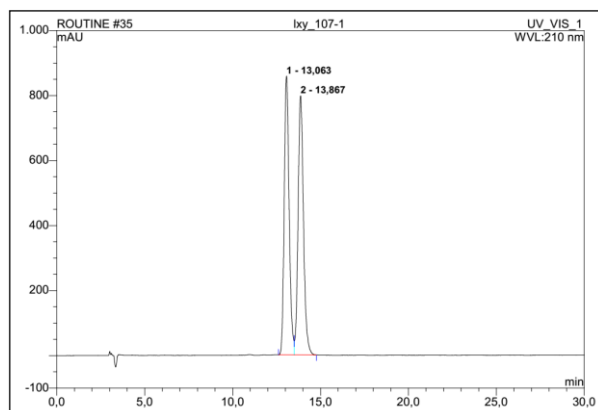

| No.    | Ret.Time<br>min | Peak Name | Height<br>mAU | Area<br>mAU*min | Rel.Area<br>% | Amount | Type |
|--------|-----------------|-----------|---------------|-----------------|---------------|--------|------|
| 1      | 13.06           | n.a.      | 857.914       | 279.032         | 49.51         | n.a.   | BM   |
| 2      | 13.87           | n.a.      | 797.443       | 284.579         | 50.49         | n.a.   | MB   |
| Total: |                 |           | 1655.357      | 563.612         | 100.00        | 0.000  |      |

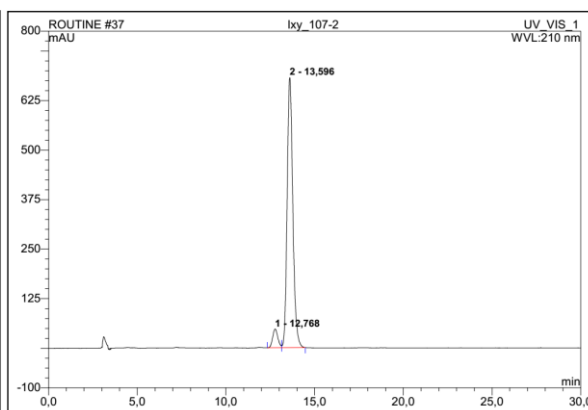

| No.    | Ret.Time<br>min | Peak Name | Height<br>mAU | Area<br>mAU*min | Rel.Area<br>% | Amount | Type |
|--------|-----------------|-----------|---------------|-----------------|---------------|--------|------|
| 1      | 12.77           | n.a.      | 47.218        | 16.021          | 5.96          | n.a.   | BM   |
| 2      | 13.60           | n.a.      | 681.534       | 252.580         | 94.04         | n.a.   | MB   |
| Total: |                 |           | 728.752       | 268.600         | 100.00        | 0.000  |      |

(3*aS*,4*aR*,10*bS*)-3*a*,4*a*-dimethyl-3,3*a*,4,4*a*-tetrahydro-2*H*-furo[2',3':2,3]cyclobuta[1,2-*c*]quinolin-5(6*H*)-one (7*c*):

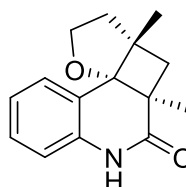

7*c*, 99% ee

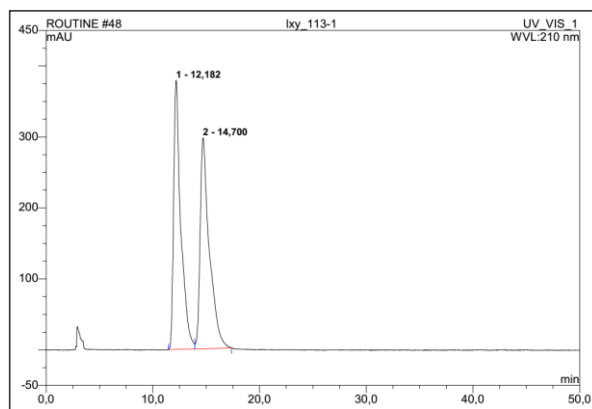

| No.    | Ret.Time<br>min | Peak Name | Height<br>mAU | Area<br>mAU*min | Rel.Area<br>% | Amount | Type |
|--------|-----------------|-----------|---------------|-----------------|---------------|--------|------|
| 1      | 12.18           | n.a.      | 379.101       | 296.487         | 49.92         | n.a.   | BM   |
| 2      | 14.70           | n.a.      | 297.002       | 297.393         | 50.08         | n.a.   | MB   |
| Total: |                 |           | 676.102       | 593.880         | 100.00        | 0.000  |      |

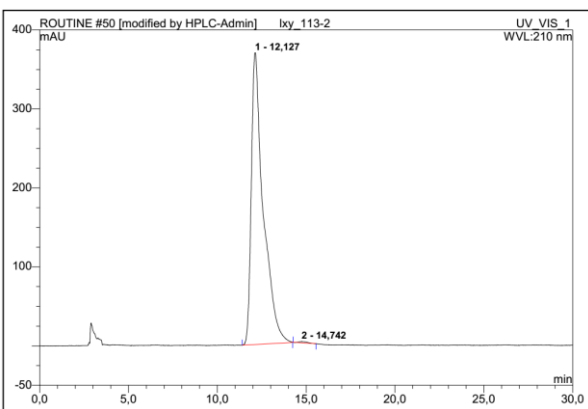

| No.    | Ret.Time<br>min | Peak Name | Height<br>mAU | Area<br>mAU*min | Rel.Area<br>% | Amount | Type |
|--------|-----------------|-----------|---------------|-----------------|---------------|--------|------|
| 1      | 12.13           | n.a.      | 369.697       | 287.231         | 99.69         | n.a.   | BMB  |
| 2      | 14.74           | n.a.      | 1.700         | 0.898           | 0.31          | n.a.   | BMB* |
| Total: |                 |           | 371.397       | 288.129         | 100.00        | 0.000  |      |

**(3a*R*,4a*R*,10b*S*)-4,4,4a-trimethyl-3,3a,4,4a-tetrahydro-2*H*-furo[2',3':2,3]cyclobuta[1,2-*c*]quinolin-5(6*H*)-one (7d):**

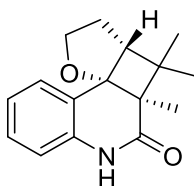

**7d, 96% ee**

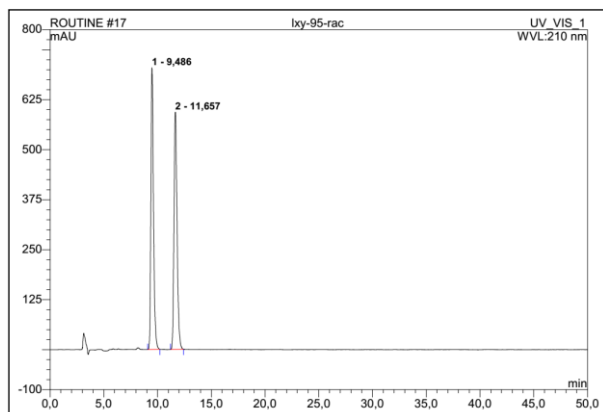

| No.    | Ret.Time<br>min | Peak Name | Height<br>mAU | Area<br>mAU*min | Rel.Area<br>% | Amount | Type |
|--------|-----------------|-----------|---------------|-----------------|---------------|--------|------|
| 1      | 9.49            | n.a.      | 704,277       | 197,682         | 50.08         | n.a.   | BMB  |
| 2      | 11.66           | n.a.      | 592,764       | 197,050         | 49.92         | n.a.   | BMB  |
| Total: |                 |           | 1297,041      | 394,731         | 100.00        | 0.000  |      |

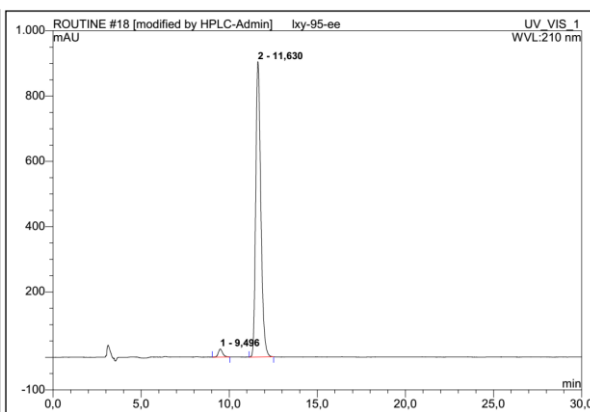

| No.    | Ret.Time<br>min | Peak Name | Height<br>mAU | Area<br>mAU*min | Rel.Area<br>% | Amount | Type |
|--------|-----------------|-----------|---------------|-----------------|---------------|--------|------|
| 1      | 9.50            | n.a.      | 24,325        | 6,757           | 2.18          | n.a.   | BMB* |
| 2      | 11.63           | n.a.      | 904,775       | 303,849         | 97.82         | n.a.   | BMB  |
| Total: |                 |           | 929,099       | 310,606         | 100.00        | 0.000  |      |

**(6a*R*,6b*R*,9a*R*,12a*S*)-6a-methyl-6b,7,8,9,10,11-hexahydro-5*H*-cyclopenta[3,4]furo[2',3':2,3]cyclobuta[1,2-*c*]quinolin-6(6a*H*)-one (7e):**

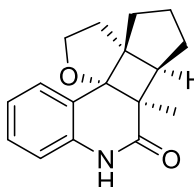

**7e, 98% ee**

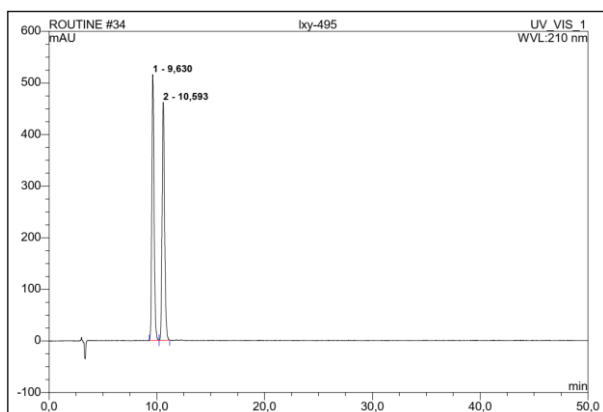

| No.    | Ret.Time<br>min | Peak Name | Height<br>mAU | Area<br>mAU*min | Rel.Area<br>% | Amount | Type |
|--------|-----------------|-----------|---------------|-----------------|---------------|--------|------|
| 1      | 9.63            | n.a.      | 515,351       | 125,073         | 50.05         | n.a.   | BM   |
| 2      | 10.59           | n.a.      | 460,831       | 124,800         | 49.95         | n.a.   | MB   |
| Total: |                 |           | 976,182       | 249,873         | 100.00        | 0.000  |      |

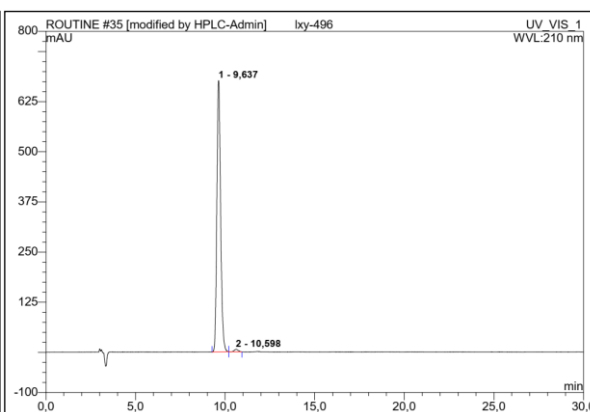

| No.    | Ret.Time<br>min | Peak Name | Height<br>mAU | Area<br>mAU*min | Rel.Area<br>% | Amount | Type |
|--------|-----------------|-----------|---------------|-----------------|---------------|--------|------|
| 1      | 9.64            | n.a.      | 675,887       | 163,676         | 99.14         | n.a.   | BMB* |
| 2      | 10.60           | n.a.      | 5,858         | 1,427           | 0.86          | n.a.   | bMB* |
| Total: |                 |           | 681,745       | 165,103         | 100.00        | 0.000  |      |

(6a*R*,6b*R*,10a*R*,13a*S*)-6a-methyl-6a,6b,7,8,9,10,11,12-octahydrobenzo[3,4]furo[2',3':2,3]cyclobuta[1,2-*c*]quinolin-6(5*H*)-one (7f):

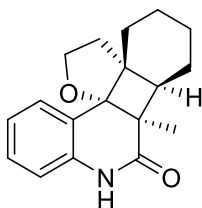

7f, 96% ee

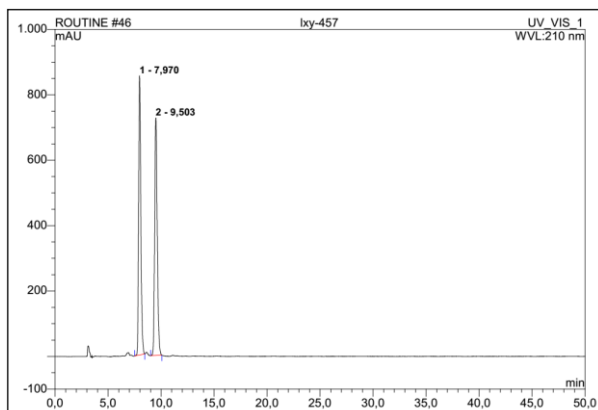

| No.    | Ret.Time<br>min | Peak Name | Height<br>mAU | Area<br>mAU*min | Rel.Area<br>% | Amount | Type |
|--------|-----------------|-----------|---------------|-----------------|---------------|--------|------|
| 1      | 7.97            | n.a.      | 853,670       | 204,047         | 49,72         | n.a.   | BMB  |
| 2      | 9.50            | n.a.      | 726,601       | 206,312         | 50,28         | n.a.   | BMB  |
| Total: |                 |           | 1580,271      | 410,359         | 100,00        | 0,000  |      |

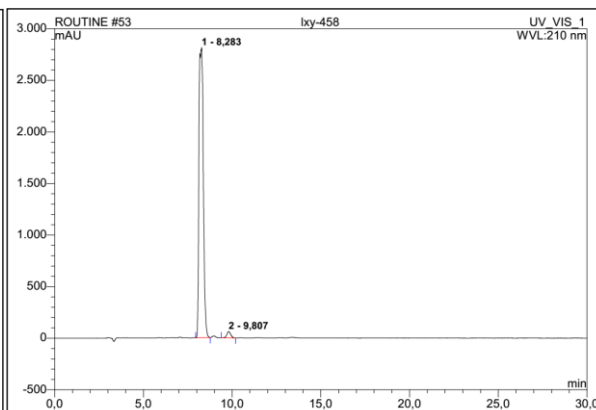

| No.    | Ret.Time<br>min | Peak Name | Height<br>mAU | Area<br>mAU*min | Rel.Area<br>% | Amount | Type |
|--------|-----------------|-----------|---------------|-----------------|---------------|--------|------|
| 1      | 8.28            | n.a.      | 2812,448      | 804,110         | 98,03         | n.a.   | BMB  |
| 2      | 9.81            | n.a.      | 62,555        | 16,179          | 1,97          | n.a.   | BMB  |
| Total: |                 |           | 2875,003      | 820,288         | 100,00        | 0,000  |      |

(3a*S*,4a*R*,10b*S*)-9-methoxy-3a,4a-dimethyl-3,3a,4,4a-tetrahydro-2*H*-furo[2',3':2,3]cyclobuta[1,2-*c*]quinolin-5(6*H*)-one (7g):

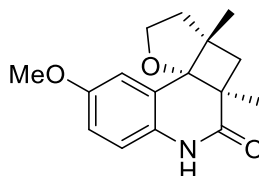

7g, 93% ee

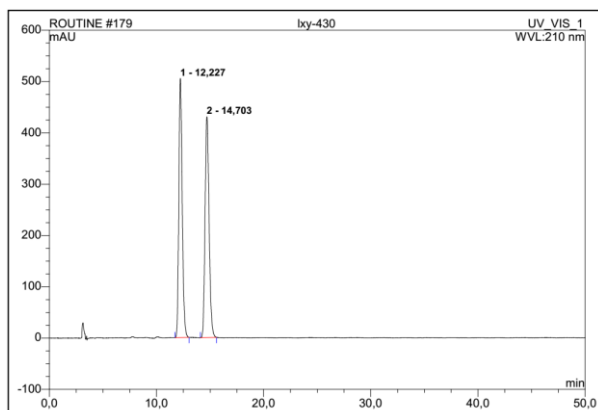

| No.    | Ret.Time<br>min | Peak Name | Height<br>mAU | Area<br>mAU*min | Rel.Area<br>% | Amount | Type |
|--------|-----------------|-----------|---------------|-----------------|---------------|--------|------|
| 1      | 12.23           | n.a.      | 505,707       | 186,629         | 49,95         | n.a.   | BMB  |
| 2      | 14.70           | n.a.      | 430,813       | 186,998         | 50,05         | n.a.   | BMB  |
| Total: |                 |           | 936,519       | 373,627         | 100,00        | 0,000  |      |

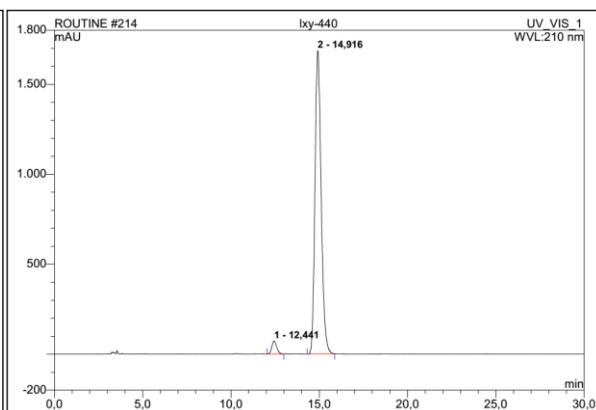

| No.    | Ret.Time<br>min | Peak Name | Height<br>mAU | Area<br>mAU*min | Rel.Area<br>% | Amount | Type |
|--------|-----------------|-----------|---------------|-----------------|---------------|--------|------|
| 1      | 12.44           | n.a.      | 71,949        | 23,474          | 3,30          | n.a.   | BMB  |
| 2      | 14.92           | n.a.      | 1686,329      | 686,825         | 96,70         | n.a.   | BMB  |
| Total: |                 |           | 1758,278      | 710,299         | 100,00        | 0,000  |      |

**(3a*S*,4a*R*,10b*S*)-3a,4a,9-trimethyl-3,3a,4,4a-tetrahydro-2*H*-furo[2',3':2,3]cyclobuta[1,2-*c*]quinolin-5(6*H*)-one (7h):**

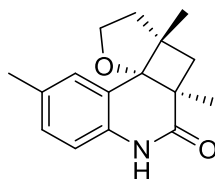

**7h, 98% ee**

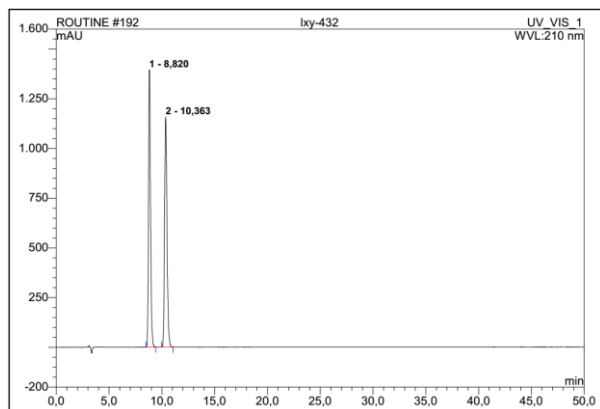

| No.    | Ret.Time<br>min | Peak Name | Height<br>mAU | Area<br>mAU*min | Rel.Area<br>% | Amount | Type |
|--------|-----------------|-----------|---------------|-----------------|---------------|--------|------|
| 1      | 8,82            | n.a.      | 1394,538      | 309,128         | 49,91         | n.a.   | BMB  |
| 2      | 10,36           | n.a.      | 1157,457      | 310,279         | 50,09         | n.a.   | BMB  |
| Total: |                 |           | 2551,995      | 619,407         | 100,00        | 0,000  |      |

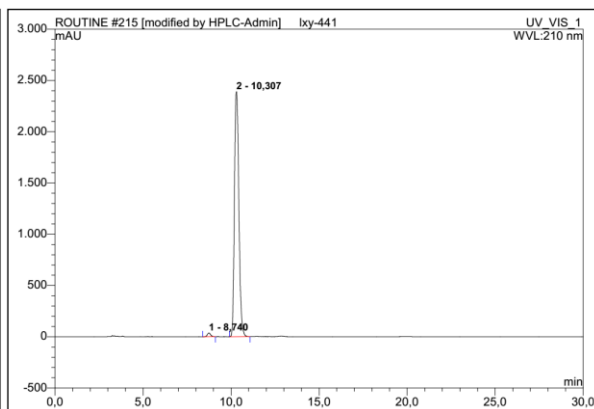

| No.    | Ret.Time<br>min | Peak Name | Height<br>mAU | Area<br>mAU*min | Rel.Area<br>% | Amount | Type |
|--------|-----------------|-----------|---------------|-----------------|---------------|--------|------|
| 1      | 8,74            | n.a.      | 36,618        | 7,875           | 1,12          | n.a.   | BMB* |
| 2      | 10,31           | n.a.      | 2389,092      | 694,958         | 98,88         | n.a.   | BMB  |
| Total: |                 |           | 2425,709      | 702,834         | 100,00        | 0,000  |      |

**(3a*S*,4a*R*,10b*S*)-9-fluoro-3a,4a-dimethyl-3,3a,4,4a-tetrahydro-2*H*-furo[2',3':2,3]cyclobuta[1,2-*c*]quinolin-5(6*H*)-one (7i):**

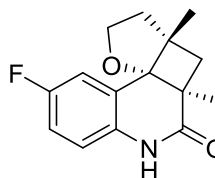

**7i, 94% ee**

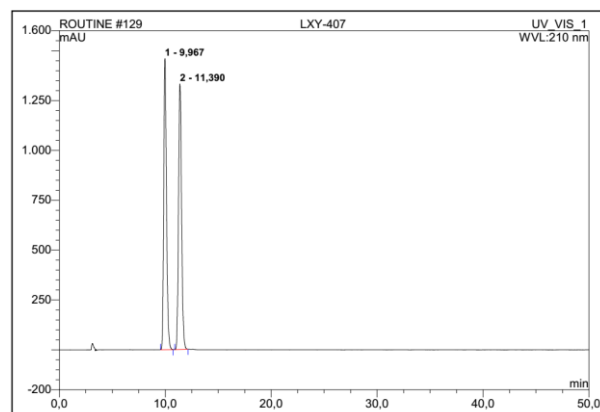

| No.    | Ret.Time<br>min | Peak Name | Height<br>mAU | Area<br>mAU*min | Rel.Area<br>% | Amount | Type |
|--------|-----------------|-----------|---------------|-----------------|---------------|--------|------|
| 1      | 9,97            | n.a.      | 1459,626      | 443,167         | 50,03         | n.a.   | BMB  |
| 2      | 11,39           | n.a.      | 1331,903      | 442,621         | 49,97         | n.a.   | BMB  |
| Total: |                 |           | 2791,530      | 885,788         | 100,00        | 0,000  |      |

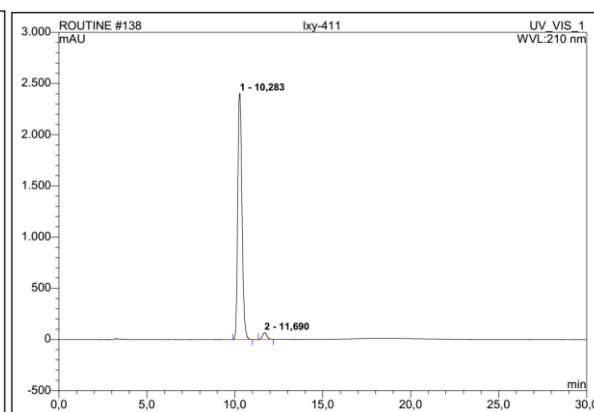

| No.    | Ret.Time<br>min | Peak Name | Height<br>mAU | Area<br>mAU*min | Rel.Area<br>% | Amount | Type |
|--------|-----------------|-----------|---------------|-----------------|---------------|--------|------|
| 1      | 10,28           | n.a.      | 2405,703      | 667,202         | 97,20         | n.a.   | BMB  |
| 2      | 11,69           | n.a.      | 65,589        | 19,191          | 2,80          | n.a.   | BMB  |
| Total: |                 |           | 2471,292      | 686,393         | 100,00        | 0,000  |      |

(3*aS*,4*aR*,10*bS*)-9-chloro-3*a*,4*a*-dimethyl-3,3*a*,4,4*a*-tetrahydro-2*H*-furo[2',3':2,3]cyclobuta[1,2-*c*]quinolin-5(6*H*)-one (7j):

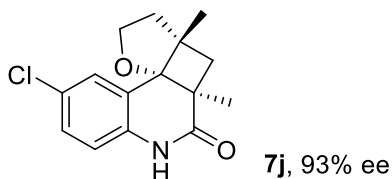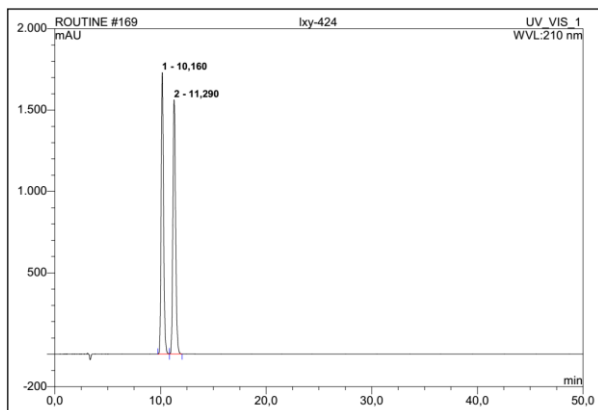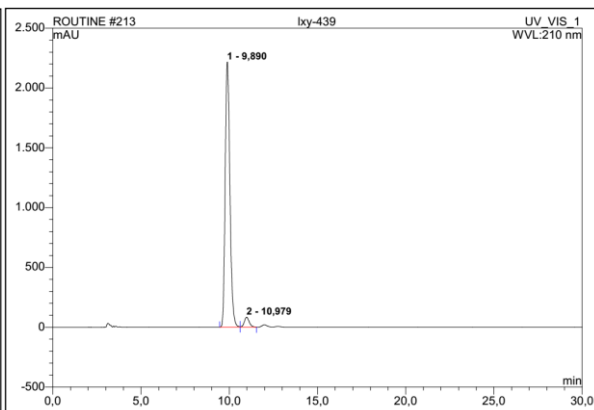

| No.    | Ret.Time<br>min | Peak Name | Height<br>mAU | Area<br>mAU*min | Rel.Area<br>% | Amount | Type |
|--------|-----------------|-----------|---------------|-----------------|---------------|--------|------|
| 1      | 10,16           | n.a.      | 1730,241      | 462,054         | 49,92         | n.a.   | BM   |
| 2      | 11,29           | n.a.      | 1561,727      | 463,550         | 50,08         | n.a.   | MB   |
| Total: |                 |           | 3291,968      | 925,604         | 100,00        | 0,000  |      |

| No.    | Ret.Time<br>min | Peak Name | Height<br>mAU | Area<br>mAU*min | Rel.Area<br>% | Amount | Type |
|--------|-----------------|-----------|---------------|-----------------|---------------|--------|------|
| 1      | 9,89            | n.a.      | 2216,791      | 686,647         | 96,27         | n.a.   | BM   |
| 2      | 10,98           | n.a.      | 82,593        | 26,622          | 3,73          | n.a.   | MB   |
| Total: |                 |           | 2299,385      | 713,269         | 100,00        | 0,000  |      |

(3*aS*,4*aR*,10*bS*)-3*a*,4*a*-dimethyl-5-oxo-3,3*a*,4,4*a*,5,6-hexahydro-2*H*-furo[2',3':2,3]cyclobuta[1,2-*c*]quinoline-9-carbonitrile (7k):

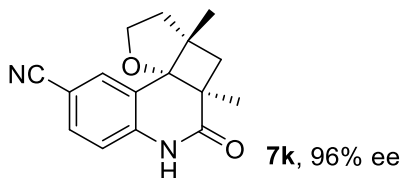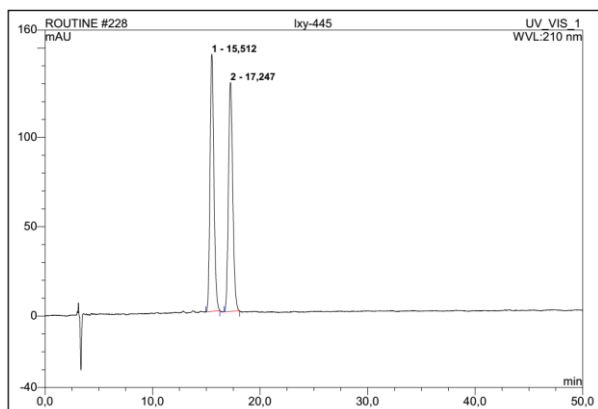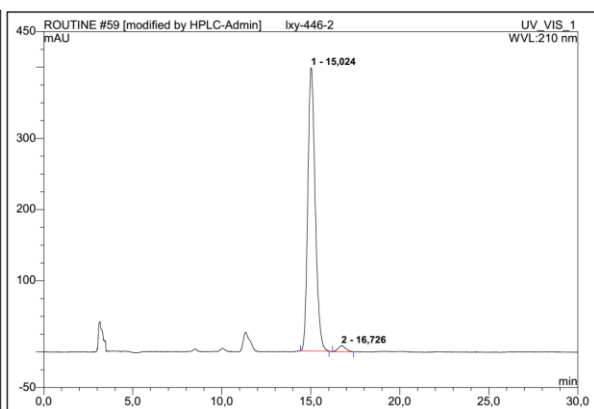

| No.    | Ret.Time<br>min | Peak Name | Height<br>mAU | Area<br>mAU*min | Rel.Area<br>% | Amount | Type |
|--------|-----------------|-----------|---------------|-----------------|---------------|--------|------|
| 1      | 15,51           | n.a.      | 143,837       | 60,442          | 50,32         | n.a.   | BMB  |
| 2      | 17,25           | n.a.      | 128,156       | 59,669          | 49,68         | n.a.   | BMB  |
| Total: |                 |           | 271,993       | 120,110         | 100,00        | 0,000  |      |

| No.    | Ret.Time<br>min | Peak Name | Height<br>mAU | Area<br>mAU*min | Rel.Area<br>% | Amount | Type |
|--------|-----------------|-----------|---------------|-----------------|---------------|--------|------|
| 1      | 15,02           | n.a.      | 398,107       | 191,206         | 97,86         | n.a.   | BMB  |
| 2      | 16,73           | n.a.      | 8,445         | 4,185           | 2,14          | n.a.   | BMB* |
| Total: |                 |           | 406,552       | 195,391         | 100,00        | 0,000  |      |

**(3a*S*,4a*R*,10b*S*)-3a,4a,8-trimethyl-3,3a,4,4a-tetrahydro-2*H*-furo[2',3':2,3]cyclobuta[1,2-*c*]quinolin-5(6*H*)-one (7l):**

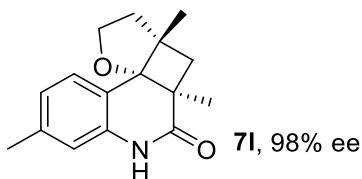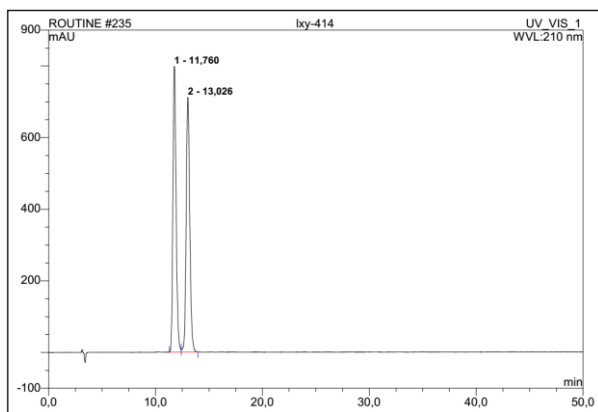

| No.           | Ret.Time<br>min | Peak Name | Height<br>mAU | Area<br>mAU*min | Rel.Area<br>% | Amount | Type |
|---------------|-----------------|-----------|---------------|-----------------|---------------|--------|------|
| 1             | 11.76           | n.a.      | 797.720       | 276.272         | 49.91         | n.a.   | BM   |
| 2             | 13.03           | n.a.      | 711.795       | 277.305         | 50.09         | n.a.   | MB   |
| <b>Total:</b> |                 |           | 1509.514      | 553.577         | 100.00        | 0.000  |      |

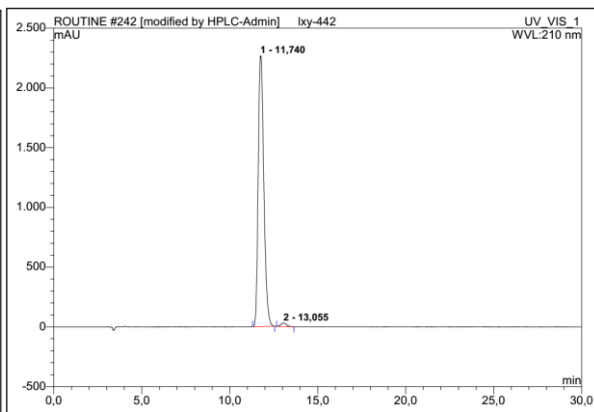

| No.           | Ret.Time<br>min | Peak Name | Height<br>mAU | Area<br>mAU*min | Rel.Area<br>% | Amount | Type |
|---------------|-----------------|-----------|---------------|-----------------|---------------|--------|------|
| 1             | 11.74           | n.a.      | 2265.833      | 840.007         | 98.76         | n.a.   | BMB* |
| 2             | 13.06           | n.a.      | 28.964        | 10.526          | 1.24          | n.a.   | BMB* |
| <b>Total:</b> |                 |           | 2294.797      | 850.533         | 100.00        | 0.000  |      |

**(3a*S*,4a*R*,10b*S*)-4a-ethyl-3a-methyl-3,3a,4,4a-tetrahydro-2*H*-furo[2',3':2,3]cyclobuta[1,2-*c*]quinolin-5(6*H*)-one (7m):**

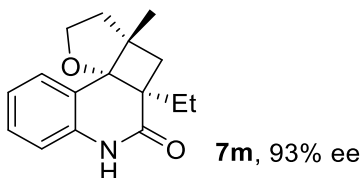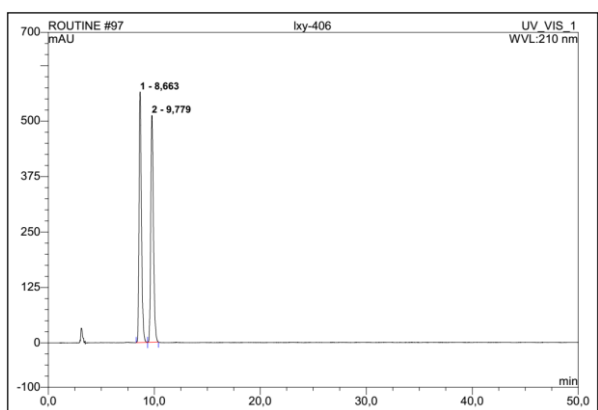

| No.           | Ret.Time<br>min | Peak Name | Height<br>mAU | Area<br>mAU*min | Rel.Area<br>% | Amount | Type |
|---------------|-----------------|-----------|---------------|-----------------|---------------|--------|------|
| 1             | 8.66            | n.a.      | 565.043       | 148.149         | 49.98         | n.a.   | BM   |
| 2             | 9.78            | n.a.      | 510.858       | 148.244         | 50.02         | n.a.   | MB   |
| <b>Total:</b> |                 |           | 1075.900      | 296.393         | 100.00        | 0.000  |      |

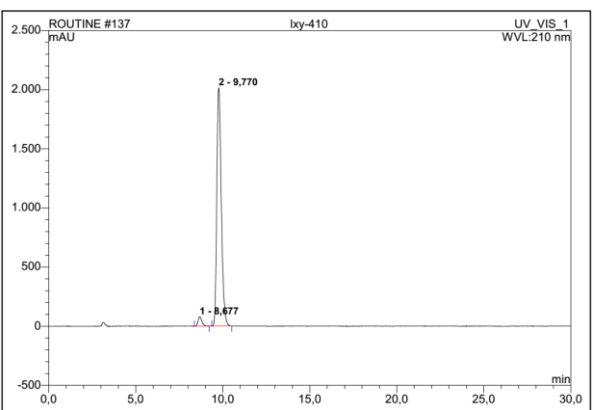

| No.           | Ret.Time<br>min | Peak Name | Height<br>mAU | Area<br>mAU*min | Rel.Area<br>% | Amount | Type |
|---------------|-----------------|-----------|---------------|-----------------|---------------|--------|------|
| 1             | 8.68            | n.a.      | 79.911        | 20.587          | 3.29          | n.a.   | BMB  |
| 2             | 9.77            | n.a.      | 2014.748      | 604.313         | 96.71         | n.a.   | BMB  |
| <b>Total:</b> |                 |           | 2094.659      | 624.900         | 100.00        | 0.000  |      |

**(3a*S*,4a*R*,10b*S*)-8-fluoro-3a,4a-dimethyl-3,3a,4,4a-tetrahydro-2*H*-furo[2',3':2,3]cyclobuta[1,2-*c*]quinolin-5(6*H*)-one (7n):**

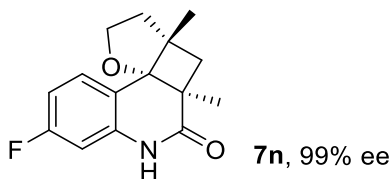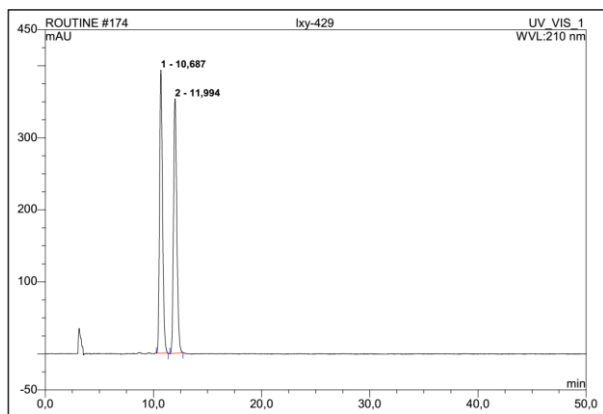

| No.           | Ret.Time<br>min | Peak Name | Height<br>mAU | Area<br>mAU*min | Rel.Area<br>% | Amount | Type |
|---------------|-----------------|-----------|---------------|-----------------|---------------|--------|------|
| 1             | 10.69           | n.a.      | 393.094       | 125.404         | 50.08         | n.a.   | BMB  |
| 2             | 11.99           | n.a.      | 353.353       | 125.024         | 49.92         | n.a.   | BMB  |
| <b>Total:</b> |                 |           | 746.447       | 250.429         | 100.00        | 0.000  |      |

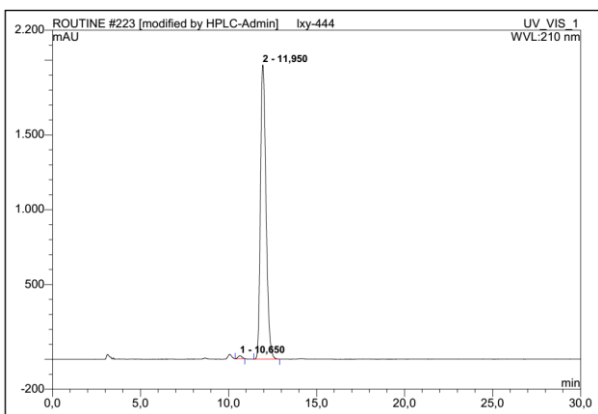

| No.           | Ret.Time<br>min | Peak Name | Height<br>mAU | Area<br>mAU*min | Rel.Area<br>% | Amount | Type |
|---------------|-----------------|-----------|---------------|-----------------|---------------|--------|------|
| 1             | 10.65           | n.a.      | 19.733        | 5.414           | 0.74          | n.a.   | MB*  |
| 2             | 11.95           | n.a.      | 1968.163      | 725.502         | 99.26         | n.a.   | BMB  |
| <b>Total:</b> |                 |           | 1987.896      | 730.916         | 100.00        | 0.000  |      |

**(3a*R*,4a*R*,10b*S*)-3a,4,4-trifluoro-4a-methyl-3,3a,4,4a-tetrahydro-2*H*-furo[2',3':2,3]cyclobuta[1,2-*c*]quinolin-5(6*H*)-one (9):**

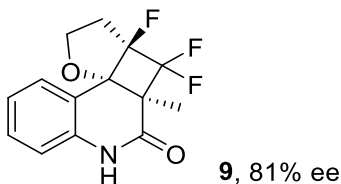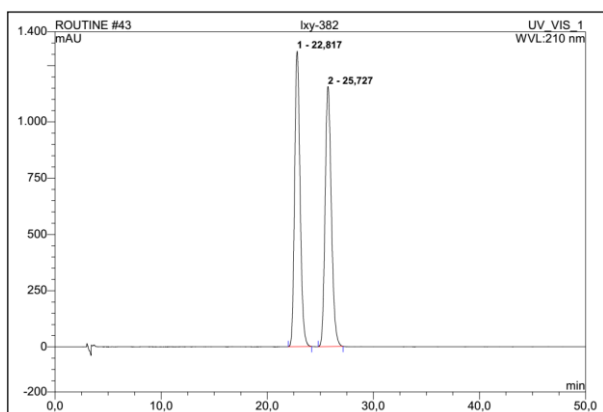

| No.           | Ret.Time<br>min | Peak Name | Height<br>mAU | Area<br>mAU*min | Rel.Area<br>% | Amount | Type |
|---------------|-----------------|-----------|---------------|-----------------|---------------|--------|------|
| 1             | 22.82           | n.a.      | 1312.814      | 787.461         | 49.92         | n.a.   | BMB  |
| 2             | 25.73           | n.a.      | 1155.386      | 790.094         | 50.08         | n.a.   | BMB  |
| <b>Total:</b> |                 |           | 2468.200      | 1577.555        | 100.00        | 0.000  |      |

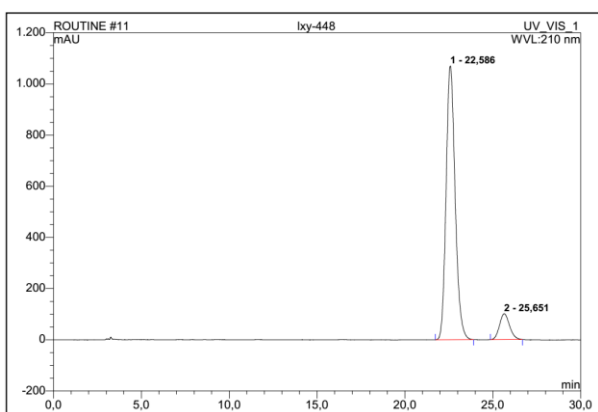

| No.           | Ret.Time<br>min | Peak Name | Height<br>mAU | Area<br>mAU*min | Rel.Area<br>% | Amount | Type |
|---------------|-----------------|-----------|---------------|-----------------|---------------|--------|------|
| 1             | 22.59           | n.a.      | 1069.746      | 638.689         | 90.48         | n.a.   | BMB  |
| 2             | 25.65           | n.a.      | 101.004       | 67.208          | 9.52          | n.a.   | BMB  |
| <b>Total:</b> |                 |           | 1170.751      | 705.897         | 100.00        | 0.000  |      |

**(3a*R*,4a*R*,10b*S*)-4a-methyl-4-methylene-3,3a,4,4a-tetrahydro-2*H*-furo[2',3':2,3]cyclobuta[1,2-*c*]quinolin-5(6*H*)-one (11a):**

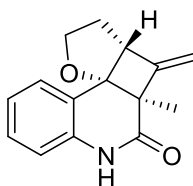

**11a, 91% ee**

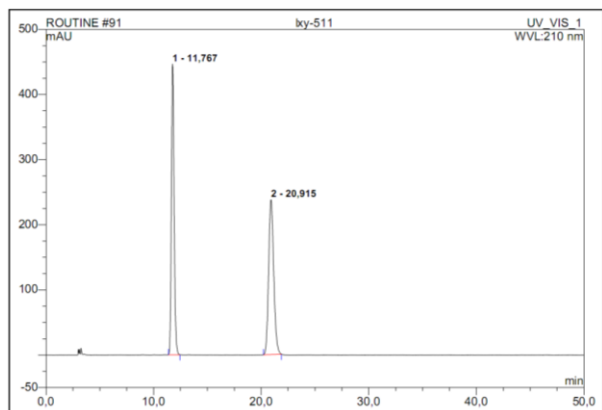

| No.           | Ret.Time<br>min | Peak Name | Height<br>mAU | Area<br>mAU*min | Rel.Area<br>% | Amount | Type |
|---------------|-----------------|-----------|---------------|-----------------|---------------|--------|------|
| 1             | 11.77           | n.a.      | 446.346       | 131.378         | 50.17         | n.a.   | BMB  |
| 2             | 20.91           | n.a.      | 237.860       | 130.471         | 49.83         | n.a.   | BMB  |
| <b>Total:</b> |                 |           | 684.206       | 261.849         | 100.00        | 0.000  |      |

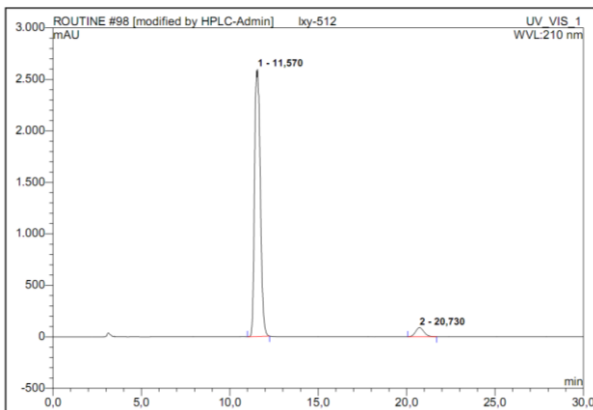

| No.           | Ret.Time<br>min | Peak Name | Height<br>mAU | Area<br>mAU*min | Rel.Area<br>% | Amount | Type |
|---------------|-----------------|-----------|---------------|-----------------|---------------|--------|------|
| 1             | 11.57           | n.a.      | 2595.406      | 979.901         | 95.28         | n.a.   | BMB* |
| 2             | 20.73           | n.a.      | 87.844        | 48.566          | 4.72          | n.a.   | BMB  |
| <b>Total:</b> |                 |           | 2683.250      | 1028.467        | 100.00        | 0.000  |      |

**(3a*R*,4a*R*,10b*S*)-3a,4a-dimethyl-4-methylene-3,3a,4,4a-tetrahydro-2*H*-furo[2',3':2,3]cyclobuta[1,2-*c*]quinolin-5(6*H*)-one (11b):**

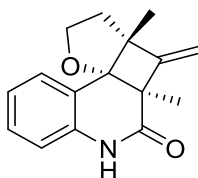

**11b, 96% ee**

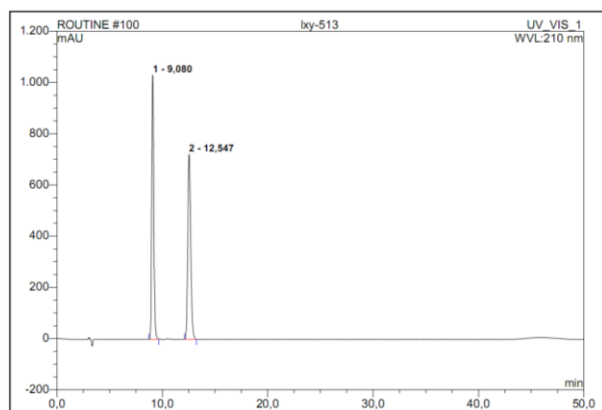

| No.           | Ret.Time<br>min | Peak Name | Height<br>mAU | Area<br>mAU*min | Rel.Area<br>% | Amount | Type |
|---------------|-----------------|-----------|---------------|-----------------|---------------|--------|------|
| 1             | 9.08            | n.a.      | 1032.433      | 232.317         | 49.96         | n.a.   | BMB  |
| 2             | 12.55           | n.a.      | 722.311       | 232.703         | 50.04         | n.a.   | BMB  |
| <b>Total:</b> |                 |           | 1754.745      | 465.019         | 100.00        | 0.000  |      |

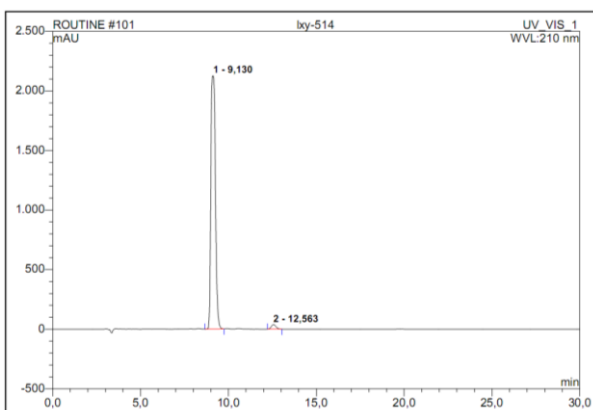

| No.           | Ret.Time<br>min | Peak Name | Height<br>mAU | Area<br>mAU*min | Rel.Area<br>% | Amount | Type |
|---------------|-----------------|-----------|---------------|-----------------|---------------|--------|------|
| 1             | 9.13            | n.a.      | 2125.964      | 638.501         | 98.13         | n.a.   | BMB  |
| 2             | 12.56           | n.a.      | 38.764        | 12.196          | 1.87          | n.a.   | BMB  |
| <b>Total:</b> |                 |           | 2164.728      | 650.697         | 100.00        | 0.000  |      |



**(3a*R*,4a*R*,10b*S*)-9-chloro-3a,4a-dimethyl-4-methylene-3,3a,4,4a-tetrahydro-2*H*-furo[2',3':2,3]-cyclobuta[1,2-*c*]quinolin-5(6*H*)-one (11c):**

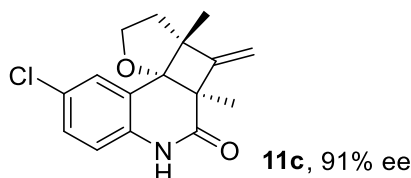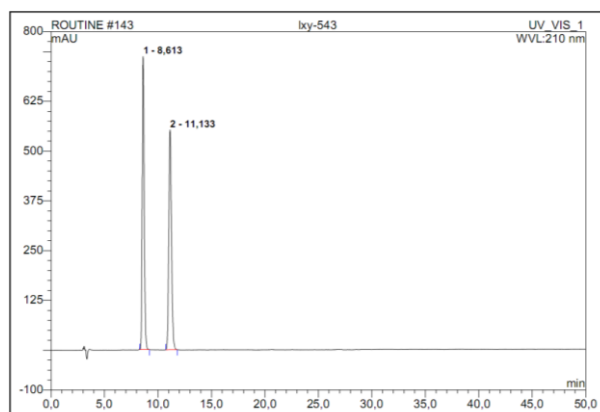

| No.    | Ret.Time<br>min | Peak Name | Height<br>mAU | Area<br>mAU*min | Rel.Area<br>% | Amount | Type |
|--------|-----------------|-----------|---------------|-----------------|---------------|--------|------|
| 1      | 8,61            | n.a.      | 736,294       | 160,481         | 50,00         | n.a.   | BMB  |
| 2      | 11,13           | n.a.      | 551,727       | 160,504         | 50,00         | n.a.   | BMB  |
| Total: |                 |           | 1288,021      | 320,985         | 100,00        | 0,000  |      |

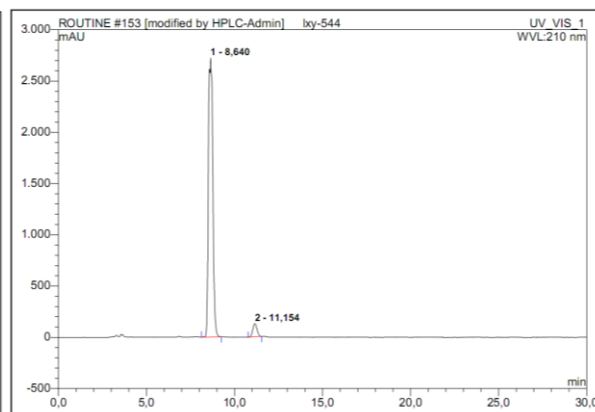

| No.    | Ret.Time<br>min | Peak Name | Height<br>mAU | Area<br>mAU*min | Rel.Area<br>% | Amount | Type |
|--------|-----------------|-----------|---------------|-----------------|---------------|--------|------|
| 1      | 8,64            | n.a.      | 2722,928      | 793,278         | 95,68         | n.a.   | BMB* |
| 2      | 11,15           | n.a.      | 129,425       | 35,790          | 4,32          | n.a.   | BMB  |
| Total: |                 |           | 2852,353      | 829,068         | 100,00        | 0,000  |      |

**(3a*R*,4a*R*,10b*S*)-4a-ethyl-3a-methyl-4-methylene-3,3a,4,4a-tetrahydro-2*H*-furo[2',3':2,3]cyclobuta[1,2-*c*]quinolin-5(6*H*)-one (11d):**

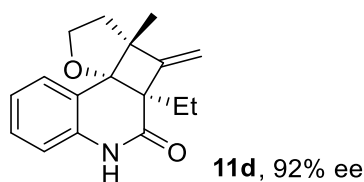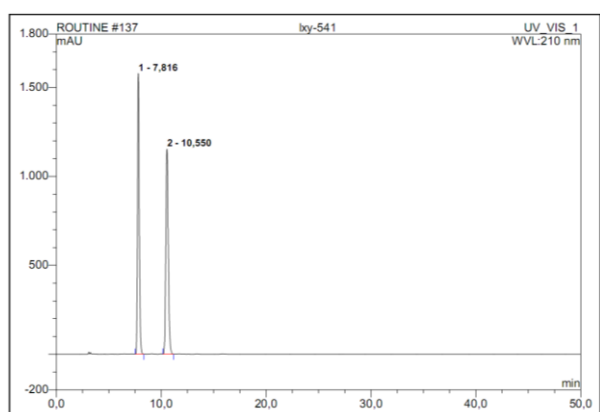

| No.    | Ret.Time<br>min | Peak Name | Height<br>mAU | Area<br>mAU*min | Rel.Area<br>% | Amount | Type |
|--------|-----------------|-----------|---------------|-----------------|---------------|--------|------|
| 1      | 7,82            | n.a.      | 1578,476      | 311,970         | 49,85         | n.a.   | BMB  |
| 2      | 10,55           | n.a.      | 1152,602      | 313,906         | 50,15         | n.a.   | BMB  |
| Total: |                 |           | 2731,079      | 625,876         | 100,00        | 0,000  |      |

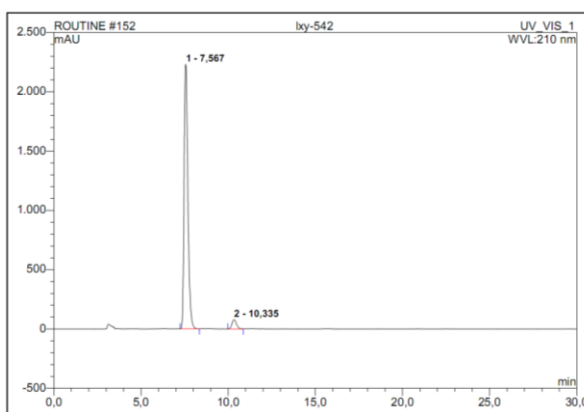

| No.    | Ret.Time<br>min | Peak Name | Height<br>mAU | Area<br>mAU*min | Rel.Area<br>% | Amount | Type |
|--------|-----------------|-----------|---------------|-----------------|---------------|--------|------|
| 1      | 7,57            | n.a.      | 2230,949      | 564,263         | 96,01         | n.a.   | BMB  |
| 2      | 10,34           | n.a.      | 78,936        | 23,421          | 3,99          | n.a.   | BMB  |
| Total: |                 |           | 2309,886      | 587,684         | 100,00        | 0,000  |      |

**(4a*R*,10b*S*)-9-chloro-4a-methyl-4,4a-dihydro-2*H*-furo[2',3':2,3]cyclobuta[1,2-*c*]quinolin-5(6*H*)-one (13a):**

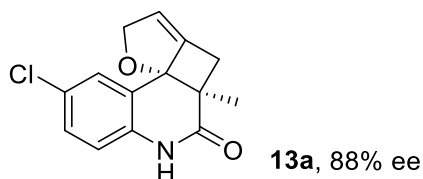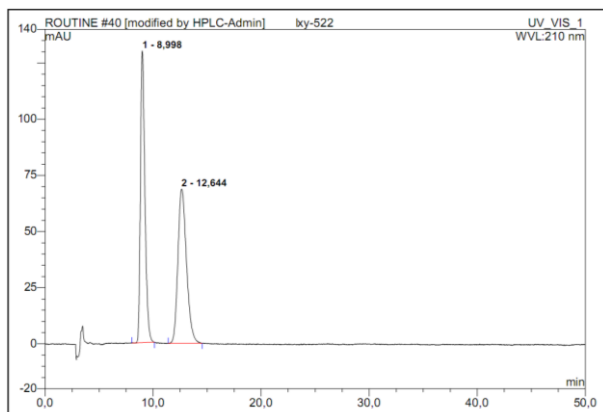

| No.    | Ret.Time<br>min | Peak Name | Height<br>mAU | Area<br>mAU*min | Rel.Area<br>% | Amount | Type |
|--------|-----------------|-----------|---------------|-----------------|---------------|--------|------|
| 1      | 9,00            | n.a.      | 129,866       | 62,513          | 49,76         | n.a.   | BMB* |
| 2      | 12,64           | n.a.      | 68,670        | 63,122          | 50,24         | n.a.   | BMB* |
| Total: |                 |           | 198,536       | 125,634         | 100,00        | 0,000  |      |

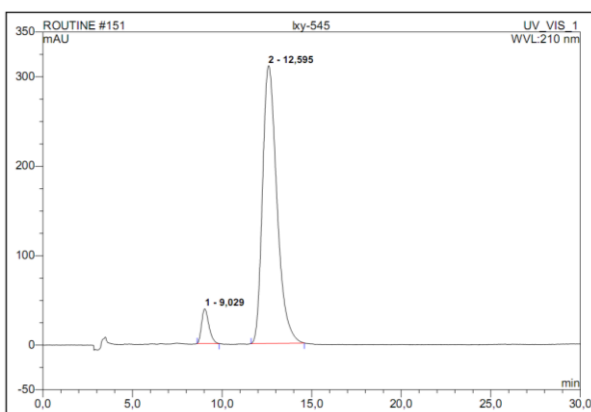

| No.    | Ret.Time<br>min | Peak Name | Height<br>mAU | Area<br>mAU*min | Rel.Area<br>% | Amount | Type |
|--------|-----------------|-----------|---------------|-----------------|---------------|--------|------|
| 1      | 9,03            | n.a.      | 39,045        | 18,325          | 5,96          | n.a.   | BMB  |
| 2      | 12,59           | n.a.      | 310,707       | 289,026         | 94,04         | n.a.   | BMB  |
| Total: |                 |           | 349,752       | 307,351         | 100,00        | 0,000  |      |

**(4a*R*,10b*S*)-4,4,4a-trimethyl-4,4a-dihydro-2*H*-furo[2',3':2,3]cyclobuta[1,2-*c*]quinolin-5(6*H*)-one (16):**

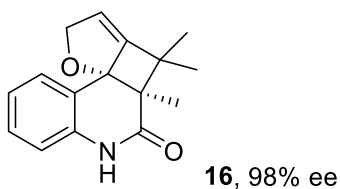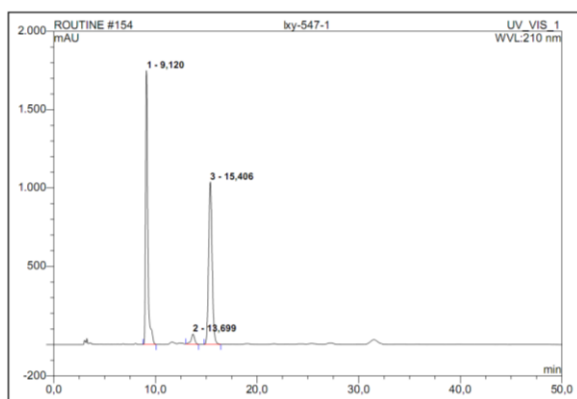

| No.    | Ret.Time<br>min | Peak Name | Height<br>mAU | Area<br>mAU*min | Rel.Area<br>% | Amount | Type |
|--------|-----------------|-----------|---------------|-----------------|---------------|--------|------|
| 1      | 9,12            | n.a.      | 1747,858      | 442,914         | 49,83         | n.a.   | BMB  |
| 2      | 13,70           | n.a.      | 64,335        | 25,670          | 2,89          | n.a.   | BMB  |
| 3      | 15,41           | n.a.      | 1036,661      | 420,262         | 47,28         | n.a.   | BMB  |
| Total: |                 |           | 2848,854      | 888,847         | 100,00        | 0,000  |      |

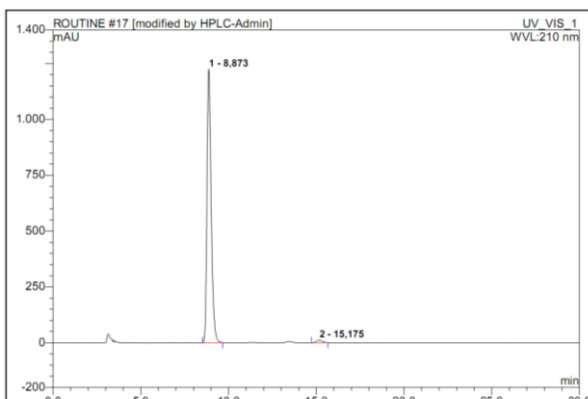

| No.    | Ret.Time<br>min | Peak Name | Height<br>mAU | Area<br>mAU*min | Rel.Area<br>% | Amount | Type |
|--------|-----------------|-----------|---------------|-----------------|---------------|--------|------|
| 1      | 8,87            | n.a.      | 1224,475      | 338,023         | 98,76         | n.a.   | BMB  |
| 2      | 15,17           | n.a.      | 10,733        | 4,247           | 1,24          | n.a.   | BMB* |
| Total: |                 |           | 1235,208      | 342,270         | 100,00        | 0,000  |      |

**(2*S*,3'*S*)-3'-methyl-3-(prop-1-en-2-yl)-1'*H*,5*H*-spiro[furan-2,4'-quinolin]-2'(3'*H*)-one (18):**

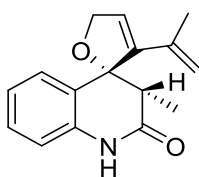

**18, 92% ee**

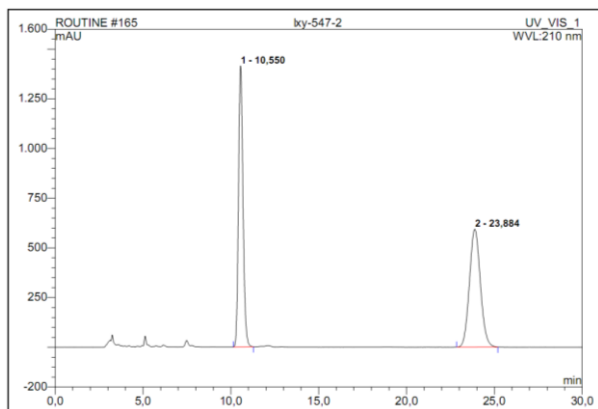

| No.    | Ret. Time<br>min | Peak Name | Height<br>mAU | Area<br>mAU*min | Rel. Area<br>% | Amount | Type |
|--------|------------------|-----------|---------------|-----------------|----------------|--------|------|
| 1      | 10.55            | n.a.      | 1413.753      | 421.051         | 49.58          | n.a.   | BMB  |
| 2      | 23.88            | n.a.      | 593.330       | 428.252         | 50.42          | n.a.   | BMB  |
| Total: |                  |           | 2007.083      | 849.302         | 100.00         | 0.000  |      |

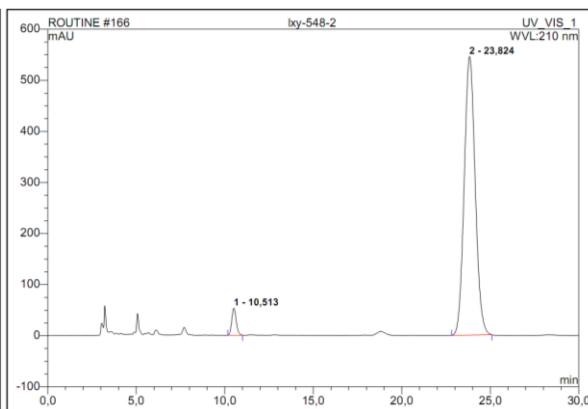

| No.    | Ret. Time<br>min | Peak Name | Height<br>mAU | Area<br>mAU*min | Rel. Area<br>% | Amount | Type |
|--------|------------------|-----------|---------------|-----------------|----------------|--------|------|
| 1      | 10.51            | n.a.      | 53.000        | 15.484          | 3.79           | n.a.   | BMB  |
| 2      | 23.82            | n.a.      | 545.588       | 392.956         | 96.21          | n.a.   | BMB  |
| Total: |                  |           | 598.588       | 408.440         | 100.00         | 0.000  |      |

## 10. Reference

1. (a) Kaneko, C.; Suzuki, T.; Sato, M.; Naito, T. *Chem. Pharm. Bull.* **1987**, *35*, 112–123. (b) Müller, C.; Bauer, A.; Bach, T. *Angew. Chem., Int. Ed.* **2009**, *48*, 6640–6642. (c) Müller, C.; Bauer, A.; Maturi, M. M.; Cuquerella, M. C.; Miranda, M. A.; Bach, T. *J. Am. Chem. Soc.* **2011**, *133*, 16689–16697.
2. Ochia, E. *J. Org. Chem.* **1953**, *18*, 534–551.
3. Bakowski, A.; Dressel, M.; Bauer, A.; Bach, T. *Org. Biomol. Chem.* **2011**, *9*, 3516–3529.
4. Gieshoff, T. N.; Villa, M.; Welther, A.; Plois, M.; Chakraborty, U.; Wolf, R.; Wangelin, A. J. *Green Chem.* **2015**, *17*, 1408–1413.
5. (a) Kafka, S.; Proisl, K.; Kašpárková, V.; Urankar, D.; Kimmel, R.; Košmrlj, J. *Tetrahedron* **2013**, *69*, 10826–10835. (b) Stadlbauer, W.; Laschober, R.; Lutschounig, H.; Schindler, G.; Kappe, T. *Monatsh. Chem.* **1992**, *123*, 617–636.
6. (a) Nishi, T.; Tabusa, F.; Tanaka, T.; Ueda, H.; Shimizu, T.; Kanbe, T.; Kimura, Y.; Nakagawa, K. *Chem. Pharm. Bull.* **1983**, *31*, 852–860. (b) Maturi, M. M.; Wenninger, M.; Alonso, R.; Bauer, A.; Pöthig, A.; Riedle, E.; Bach, T. *Chem.–Eur. J.* **2013**, *19*, 7461–7472.
7. *APEX suite of crystallographic software*, APEX 3, Version 2016-9.0, Bruker AXS Inc. Madison, Wisconsin, USA, 2016.
8. *SAINT*, Version 8.38A and *SADABS*, Version 2016/2, Bruker AXS Inc. Madison, Wisconsin, USA, 2016/2017.
9. Sheldrick, G. M. *Acta Crystallogr. Sect. A* **2015**, *71*, 3–8.
10. Sheldrick, G. M. *Acta Crystallogr. Sect. C* **2015**, *71*, 3–8.
11. Hübschle, C. B.; Sheldrick, G. M.; Dittrich, B. *J. Appl. Cryst.* **2011**, *44*, 1281–1284.
12. *International Tables for Crystallography, Vol. C* (Wilson, A. J. Ed.), Kluwer Academic Publishers, Dordrecht, The Netherlands, 1992, Tables 6.1.1.4 (pp. 500–502), 4.2.6.8 (pp. 219–222), and 4.2.4.2 (pp. 193–199).
13. Macrae, C. F.; Bruno, I. J.; Chisholm, J. A.; Edgington, P. R.; McCabe, P.; Pidcock, E.; Rodriguez-Monge, L.; Taylor, R.; van de Streek, J.; Wood, P. A. *J. Appl. Cryst.* **2008**, *41*, 466–470.
14. Spek, A. L. *Acta Crystallogr. Sect. D* **2009**, *65*, 148–155.
15. Flack, H. D. *Acta Crystallogr. Sect. A* **1983**, *39*, 876–881.
16. Parsons, S.; Flack, H. D.; Wagner, T. *Acta Crystallogr. Sect. B* **2013**, *69*, 249–259.
